# Supplementary material for: Bioinformatic analysis predicts that ethanol exposure during early development causes alternative splicing alterations of genes involved in RNA post-transcriptional regulation
Source: PLoS One. 2023 Apr 13;18(4):e0284357. doi: 10.1371/journal.pone.0284357 (PMC10101408; doi:10.1371/journal.pone.0284357)
Supplement: S1 Table — Datasheets including VAST-TOOLS, rMATS, MAJIQ, Microexonator and Gene Ontology results. (XLSX) [file pone.0284357.s004.xlsx]

## Sheet: vast_tools
GENE	EVENT	COORD	LENGTH	FullCO	COMPLEX	kawa_c1_filtered	kawa_c1_filtered-Q	kawa_c2_filtered	kawa_c2_filtered-Q	kawa_e1_filtered	kawa_e1_filtered-Q	kawa_e2_filtered	kawa_e2_filtered-Q	dPSI
CFDP1	HsaEX0014915	chr16:75395090-75395209	120	chr16:75411825,75395090-75395209,75305182	S	100.00	LOW,OK,25=12=0,OK,S@37.00,0.00	64.59	VLOW,OK,13=10=7,OK,S@19.38,10.62	55.61	VLOW,OK,19=8=11,OK,C1@21.13,16.87	46.24	OK,SOK,19=23=29,B1,S@32.83,38.17	-31.38
GAPVD1	HsaEX0027015	chr9:125342219-125342299	81	chr9:125341264,125341752+125342219-125342299,125346819	S	100.00	VLOW,VLOW,16=7=0,B1,S@23.00,0.00	91.30	VLOW,VLOW,8=13=1,OK,S@20.09,1.91	59.09	VLOW,VLOW,12=14=9,OK,C1@20.68,14.32	70.21	LOW,LOW,20=13=7,OK,S@28.08,11.92	-31
LARS	HsaEX0035401	chr5:146153174-146153227	54	chr5:146153734,146153174-146153227,146152002	S	90.24	LOW,LOW,25=12=2,B1,S@35.19,3.81	69.23	VLOW,VLOW,19=8=6,B1,S@22.85,10.15	50.88	VLOW,VLOW,22=7=14,B1,S@21.88,21.12	47.06	OK,OK,34=14=27,B1,S@35.30,39.70	-30.76
LENG8	HsaINT0091317	chr19:54458522-54460765	2244	chr19:54458314-54458521=54460766-54462037:+	IR	56.52	VLOW,VLOW,16.9=143,14=12=10,0.954@20.35,15.65	70	LOW,LOW,21.5=143,17=11=6,0.79@23.8,10.2	26.83	LOW,LOW,9.1=143,6=5=15,0.815@6.98,19.02	38.46	OK,OK,22.0=143,18=17=28,0.985@24.23,38.77	-30.62
MAPKAP1	HsaEX0037808	chr9:125506310-125506391	82	chr9:125543059+125543088,125506164+125506310-125506391+125506417+125506453,125484583	S	72.22	VLOW,VLOW,13=13=5,OK,S@22.39,8.61	62.79	VLOW,VLOW,9=18=8,OK,S@21.98,13.02	42.11	VLOW,VLOW,10=6=11,OK,C1@11.37,15.63	31.76	OK,OK,6=21=29,B1,S@17.79,38.21	-30.56
AGTPBP1	HsaEX0003186	chr9:85678335-85678398	64	chr9:85681268,85678335-85678398,85677582	S	84.00	VLOW,VLOW,16=5=2,B1,S@19.32,3.68	93.75	LOW,LOW,18=12=1,OK,S@29.06,1.94	46.34	VLOW,VLOW,13=6=11,B1,C1@13.90,16.10	70.91	LOW,LOW,27=12=8,B1,S@33.33,13.67	-30.26
WIZ	HsaEX0071548	chr19:15428110-15428508	399	chr19:15429586,15428110-15428508,15427527+15427533	S	44.52	VLOW,VLOW,6=12=11,B1,S@12.91,16.09	64.80	VLOW,VLOW,16=7=6,B1,S@18.79,10.21	22.80	LOW,LOW,7=4=18,OK,S@6.61,22.39	28.68	OK,OK,10=13=28,OK,S@14.63,36.37	-28.92
FGFR1	HsaEX1014516	chr8:38413596-38413804	209	chr8:38413918,38413596-38413804,38412595	S	27.66	LOW,LOW,13=0=17,Bl,S@8.30,21.70	44.44	VLOW,VLOW,16=0=10,B3,S@11.55,14.45	3.70	VLOW,VLOW,1=0=13,Bn,S@0.52,13.48	11.39	OK,OK,9=0=35,Bl,S@5.01,38.99	-28.51
MTSS1	HsaEX0040732	chr8:124558785-124558832	48	chr8:124562782,124558713+124558785-124558832,124556354+124556405	C2	67.57	LOW,LOW,15=10=6,OK,C1@20.95,10.05	78.95	LOW,LOW,16=14=4,OK,C1@26.84,7.16	58.49	LOW,LOW,20=11=11,OK,C2@24.57,17.43	33.33	OK,OK,16=14=30,OK,C2@20.00,40.00	-27.35
LINC01551	HsaINT1020318	chr14:28772856-28773359	504	chr14:28772704-28772855=28773360-28773433:+	IR	52.94	VLOW,VLOW,8.3=151,9=18=12,0.687@20.65,18.35	50	LOW,LOW,12.8=151,11=19=15,0.88@22.5,22.5	27.27	VLOW,VLOW,9.3=151,3=6=12,0.537@5.73,15.27	22.29	OK,OK,12.5=151,13=22=61,0.902@21.4,74.6	-26.69
ERC1	HsaEX0022977	chr12:1204501-1204512	12	chr12:1190052,1204501-1204512,1236769	S	58.33	LOW,LOW,2=4=15,OK,S@12.25,8.75	55.06	OK,OK,3=4=20,OK,S@14.87,12.13	30.43	LOW,LOW,0=2=16,Bl,S@5.48,12.52	32.31	OK,OK,0=3=22,B3,S@8.08,16.92	-25.33
CIAO1	HsaEX0015369	chr2:96269268-96269355	88	chr2:96268658,96269268-96269355,96271111	S	100.00	VLOW,VLOW,9=26=0,B1,S@35.00,0.00	100.00	VLOW,VLOW,7=26=0,B1,S@33.00,0.00	78.41	LOW,LOW,12=18=4,OK,S@26.66,7.34	71.43	OK,OK,16=34=10,B1,S@42.86,17.14	-25.08
HLTF	HsaEX0030138	chr3:149064791-149064866	76	chr3:149068229+149068240,149064791-149064866,149063524	S	100.00	LOW,LOW,11=19=0,OK,S@30.00,0.00	83.81	LOW,LOW,10=22=3,B1,S@29.33,5.67	59.29	VLOW,VLOW,8=10=6,OK,S@14.23,9.77	74.74	LOW,LOW,12=55=11,B1,S@58.30,19.70	-24.89
NRIP1	HsaEX0043828	chr21:15014344-15014466	123	chr21:15043495,15014344-15014466,14968526	S	50.18	LOW,LOW,14=15=14,OK,S@21.58,21.42	61.84	VLOW,VLOW,10=10=6,OK,S@16.08,9.92	41.05	VLOW,VLOW,5=12=12,B1,S@11.90,17.10	21.86	OK,OK,16=14=52,OK,S@17.93,64.07	-24.56
DOCK7	HsaEX0020639	chr1:62544947-62545039	93	chr1:62552732,62544947-62545039,62543745	S	80.00	VLOW,VLOW,15=9=3,OK,C1@21.60,5.40	62.50	VLOW,VLOW,11=9=6,OK,S@16.25,9.75	45.95	VLOW,VLOW,8=9=10,OK,S@12.41,14.59	47.73	OK,OK,21=21=23,OK,C1@31.02,33.98	-24.41
SLC25A36	HsaINT0151837	chr3:140963228-140970926	7699	chr3:140963127-140963227=140970927-140970993:+	IR	29.41	VLOW,VLOW,8.3=151,6=4=12,0.76@6.47,15.53	36.84	VLOW,VLOW,9.3=151,7=7=12,0.943@9.58,16.42	7.14	VLOW,VLOW,6.3=151,1=1=13,0.36@1.07,13.93	11.69	OK,OK,8.3=151,7=2=34,0.422@5.03,37.97	-23.71
ANO10	HsaEX0004630	chr3:43600384-43600581	198	chr3:43605714,43600384-43600581,43598666	S	90.48	VLOW,VLOW,8=11=1,OK,S@18.10,1.90	100.00	VLOW,VLOW,12=12=0,OK,S@24.00,0.00	58.82	VLOW,VLOW,10=10=7,OK,C1@15.88,11.12	84.62	OK,OK,31=24=5,OK,S@50.77,9.23	-23.52
PAM	HsaEX0045322	chr5:102974116-102974298	183	chr5:102961229,102974116-102974298+102974436,102990272	S	85.19	VLOW,VLOW,8=15=2,OK,S@21.30,3.70	63.64	VLOW,VLOW,8=13=6,OK,S@17.18,9.82	57.89	VLOW,VLOW,9=13=8,OK,S@17.37,12.63	45.45	LOW,LOW,14=11=15,OK,S@18.18,21.82	-22.74
VLDLR	HsaEX0070390	chr9:2641377-2641499	123	chr9:2639981,2641377-2641499,2643160	S	83.67	OK,OK,18=23=4,OK,S@37.65,7.35	72.55	OK,OK,17=20=7,OK,S@31.92,12.08	57.14	VLOW,VLOW,15=9=9,OK,S@18.86,14.14	53.68	OK,OK,24=27=22,OK,S@39.19,33.81	-22.7
FBXO25	HsaEX0025272	chr8:432886-432935	50	chr8:431444,432886-432935,435615	S	100.00	OK,OK,20=20=0,OK,S@40.00,0.00	95.18	LOW,LOW,26=14=1,OK,C1@39.02,1.98	65.24	VLOW,VLOW,11=8=5,OK,S@15.66,8.34	84.86	OK,OK,51=17=6,B1,C1@62.80,11.20	-22.54
PRDM4	HsaEX0049946	chr12:107751883-107752209	327	chr12:107753924,107751415+107751647+107751883-107752209,107746424	S	100.00	OK,OK,19=22=0,OK,S@41.00,0.00	100.00	LOW,LOW,13=16=0,OK,S@29.00,0.00	76.00	VLOW,VLOW,11=8=3,OK,S@16.72,5.28	79.22	OK,OK,25=36=8,OK,S@54.66,14.34	-22.39
SEC31A	HsaEX0056948	chr4:82862534-82862572	39	chr4:82863318,82862534-82862572,82857764	C3	71.99	LOW,OK,14=33=10,B1,C3@41.03,15.97	85.46	VLOW,VLOW,9=34=4,B1,C3@40.17,6.83	56.76	VLOW,VLOW,8=16=10,OK,C3@19.30,14.70	56.41	SOK,SOK,17=54=30,B1,C3@56.97,44.03	-22.14
ZNF207	HsaEX0073177	chr17:32361468-32361515	48	chr17:32360967,32361468-32361515,32362914	S	74.83	OK,OK,22=30=9,OK,S@45.65,15.35	65.36	LOW,OK,14=19=6,OK,C1@25.49,13.51	41.64	VLOW,OK,14=11=10,OK,C2@14.57,20.43	54.53	LOW,OK,13=34=16,OK,C1@34.35,28.65	-22
EMC9	HsaINT0060097	chr14:24141317-24141437	121	chr14:24141438-24141588=24141107-24141316:-	IR	89.47	VLOW,VLOW,1.9=72,11=6=1,0.235@16.1,1.9	100	VLOW,VLOW,2.9=72,10=8=0,0.466@18,0	72.73	VLOW,VLOW,7.3=72,6=10=3,0.857@13.82,5.18	72.73	OK,OK,7.8=72,32=16=9,0.152@41.46,15.54	-22
OXA1L	HsaINT0119136	chr14:22769935-22770192	258	chr14:22769791-22769934=22770193-22770278:+	IR	20	VLOW,VLOW,1.2=151,4=2=12,0.558@3.6,14.4	37.14	VLOW,VLOW,1.6=151,3=10=11,0.289@8.91,15.09	9.68	VLOW,VLOW,0.7=151,1=2=14,0.802@1.65,15.35	3.57	OK,OK,1.6=151,0=2=27,0.51@1.04,27.96	-21.95
TIAM2	HsaEX7003969	chr6:155016241-155016361	121	chr6:154995492,155016241-155016361,155090289	ANN	29.76	OK,OK,8=9=21,OK,C3@11.31,26.69	29.17	VLOW,VLOW,4=7=14,OK,C2@7.29,17.71	0.00	VLOW,VLOW,0=0=14,Bn,C1@0.00,14.00	15.20	LOW,LOW,1=4=17,B2,C2@3.34,18.66	-21.87
ACADVL	HsaINT0002189	chr17:7220047-7220121	75	chr17:7219806-7220046=7220122-7220197:+	IR	59.09	LOW,LOW,9.4=26,16=10=9,0.851@20.68,14.32	48.84	VLOW,VLOW,2.7=26,10=11=11,0.4@15.63,16.37	28.57	VLOW,VLOW,8.1=26,6=2=10,0.422@5.14,12.86	35.85	LOW,LOW,17.5=26,5=14=17,0.32@12.91,23.09	-21.76
TIMM44	HsaINT0167206	chr19:7928167-7931137	2971	chr19:7931138-7931188=7928077-7928166:-	IR	26.09	LOW,LOW,0.5=151,7=5=17,0.0949@7.57,21.43	31.03	VLOW,VLOW,0.2=151,6=3=10,0.133@5.9,13.1	10.34	VLOW,VLOW,0.2=151,1=2=13,0.51@1.65,14.35	3.45	OK,OK,0.7=151,2=0=28,0.51@1.04,28.96	-21.67
ZNF346	HsaEX0073496	chr5:177050751-177050936	186	chr5:177044526+177044533,177050703+177050751-177050936,177062058	C1	78.46	VLOW,VLOW,12=10=3,OK,C1@19.61,5.39	100.00	VLOW,VLOW,15=6=0,B1,S@21.00,0.00	73.25	VLOW,VLOW,14=8=4,OK,C1@19.05,6.95	62.37	VLOW,VLOW,10=10=6,OK,C1@16.22,9.78	-21.42
TANC2	HsaEX0063562	chr17:63151270-63151380	111	chr17:63099246+63099357,63151270-63151380,63193991	S	42.88	VLOW,VLOW,4=16=13,B1,S@14.15,18.85	70.37	VLOW,VLOW,9=25=7,B1,S@28.85,12.15	33.02	VLOW,VLOW,5=7=12,OK,S@7.92,16.08	37.41	OK,OK,11=23=28,B1,S@23.19,38.81	-21.4
UBALD1	HsaINT0059433	chr16:4610556-4614677	4122	chr16:4614678-4614926=4610493-4610555:-	IR	33.33	VLOW,VLOW,0.7=151,7=5=12,0.285@8,16	49.93	VLOW,VLOW,1.4=151,9=11=10,0.102@14.99,15.04	21.21	VLOW,VLOW,0.5=151,3=4=13,0.26@4.24,15.76	19.48	OK,OK,1.6=151,10=5=31,0.289@8.96,37.04	-21.29
PSPC1	HsaEX0050671	chr13:19709542-19709599	58	chr13:19730239,19709542-19709599,19677823	C2	69.81	OK,OK,15=22=8,OK,C3@31.41,13.59	88.47	VLOW,LOW,9=20=2,OK,C3@27.43,3.57	57.14	VLOW,VLOW,13=11=9,OK,C2@18.86,14.14	58.73	LOW,LOW,10=27=13,B1,C3@29.36,20.64	-21.2
KAT6B	HsaEX0041382	chr10:74838683-74838752	70	chr10:74825356+74825360+74825535+74825674+74825766,74838683-74838752+74838783,74842600	C1	100.00	LOW,LOW,15=13=0,OK,C1@28.00,0.00	100.00	VLOW,VLOW,11=14=0,OK,C2@25.00,0.00	73.47	VLOW,VLOW,15=7=4,B1,C2@19.10,6.90	84.12	OK,OK,24=29=5,OK,C1@48.79,9.21	-21.2
GPCPD1	HsaINT1014716	chr20:5586270-5593326	7057	chr20:5593327-5593411=5586194-5586269:-	IR	34.43	OK,OK,4.6=151,12=9=20,0.647@14.12,26.88	50.62	OK,OK,8.6=151,27=14=20,0.396@30.88,30.12	22.22	OK,OK,5.3=151,8=8=28,0.863@9.78,34.22	20.57	OK,OK,6.3=151,19=10=56,0.4@17.48,67.52	-21.13
CACNG7	HsaEX0012084	chr19:53941470-53941615	146	chr19:53915505,53941470-53941615,53942036	S	93.33	LOW,LOW,17=11=1,OK,S@27.07,1.93	88.24	LOW,LOW,14=16=2,OK,S@28.24,3.76	73.33	VLOW,VLOW,16=6=4,B1,S@19.07,6.93	67.09	OK,OK,32=21=13,OK,S@44.28,21.72	-20.57
ZMYM4	HsaEX0072915	chr1:35361619-35361789	171	chr1:35361255,35361619-35361789,35370029	C1	66.27	OK,OK,28=27=14,OK,C2@45.73,23.27	79.59	OK,OK,23=16=5,OK,C1@35.02,8.98	51.65	OK,OK,22=23=21,OK,C2@34.09,31.91	53.64	SOK,SOK,49=32=35,OK,C2@62.22,53.78	-20.29
SNHG5	HsaINT0155946	chr6:85677493-85677794	302	chr6:85677795-85677875=85677424-85677492:-	IR	38.1	VLOW,VLOW,6.5=151,1=15=13,0.034@11.05,17.95	30.16	OK,OK,6.5=151,2=17=22,0.0602@12.37,28.63	17.33	OK,OK,4.2=151,1=12=31,0.0781@7.63,36.37	10.48	OK,OK,6.7=151,0=11=47,0.0247@6.08,51.92	-20.23
RIT1	HsaINT0140970	chr1:155904805-155910449	5645	chr1:155910450-155910506=155904731-155904804:-	IR	23.08	VLOW,VLOW,1.2=151,6=0=10,0.133@3.69,12.31	35.29	VLOW,VLOW,2.3=151,6=6=11,0.588@8.12,14.88	14.29	VLOW,VLOW,0.5=151,3=1=12,0.364@2.29,13.71	3.7	OK,OK,1.2=151,2=0=26,0.51@1.04,26.96	-20.19
CLPX	HsaEX0015783	chr15:65162604-65162645	42	chr15:65164029,65162604-65162645,65158751	S	94.16	LOW,LOW,17=13=1,OK,S@29.19,1.81	100.00	VLOW,VLOW,17=7=0,B1,S@24.00,0.00	65.48	VLOW,VLOW,11=7=5,OK,S@15.06,7.94	88.42	OK,OK,33=37=5,OK,S@66.31,8.69	-20.13
FGFR1OP2	HsaINT1013622	chr12:26960629-26963341	2713	chr12:26960515-26960628=26963342-26963455:+	IR	37.14	VLOW,VLOW,1.6=151,12=1=11,0.0781@8.91,15.09	27.78	VLOW,VLOW,0.7=151,6=4=13,0.36@6.39,16.61	18.92	LOW,LOW,1.2=151,4=3=15,0.558@4.16,17.84	6.02	OK,OK,1.4=151,5=0=39,0.186@2.65,41.35	-19.99
TIA1	HsaINT1044243	chr2:70227823-70229058	1236	chr2:70229059-70229091=70227735-70227822:-	IR	30.22	OK,OK,12.3=151,7=15=23,0.882@15.9,36.72	28.5	LOW,OK,10.9=151,6=9=19,0.936@10.97,27.53	12.66	OK,OK,7.2=151,4=2=22,0.501@4.16,28.69	6.11	OK,OK,11.4=151,4=3=61,0.4@4.45,68.4	-19.98
DYRK1A	HsaINT0053318	chr21:37486615-37490174	3560	chr21:37486467-37486614=37490175-37490461:+	IR	24.14	VLOW,VLOW,0.9=151,7=0=11,0.0949@4.35,13.65	31.03	VLOW,VLOW,0.0=151,7=2=10,0.0949@5.9,13.1	12.5	VLOW,VLOW,0.2=151,3=1=14,0.364@2.25,15.75	3.23	OK,OK,0.0=151,2=0=30,0.51@1.03,30.97	-19.72
AKIRIN2	HsaINT0006416	chr6:87681764-87701449	19686	chr6:87701450-87702209=87681620-87681763:-	IR	24.46	LOW,LOW,0.9=151,10=2=18,0.133@7.47,23.06	29.82	LOW,LOW,1.2=151,13=1=16,0.0594@9.09,21.38	8.85	LOW,LOW,0.7=151,3=0=15,0.364@1.63,16.81	6.16	OK,OK,1.6=151,5=0=37,0.186@2.65,40.43	-19.64
RNF144A	HsaEX0053904	chr2:6996916-6997061	146	chr2:6941147,6996916-6997061,7014454	S	100.00	VLOW,VLOW,10=7=0,OK,S@17.00,0.00	100.00	VLOW,VLOW,10=7=0,OK,C1@17.00,0.00	66.67	VLOW,VLOW,10=6=4,OK,C1@13.33,6.67	94.12	LOW,LOW,17=15=1,OK,S@31.06,1.94	-19.6
PAPOLA	HsaEX0045441	chr14:96560649-96560711	63	chr14:96556413,96560649-96560711,96564955	C2	44.30	OK,OK,14=21=22,OK,C3@25.25,31.75	39.02	OK,OK,11=21=25,OK,C3@22.24,34.76	28.77	OK,OK,8=13=26,OK,C2@13.52,33.48	15.53	OK,OK,11=14=68,OK,C2@14.44,78.56	-19.51
TBC1D14	HsaEX0063778	chr4:7009877-7009948	72	chr4:7006726,7009877-7009948,7010653	S	90.91	OK,OK,20=20=2,OK,C1@38.18,3.82	87.88	LOW,LOW,13=16=2,OK,C1@27.24,3.76	63.33	LOW,LOW,19=19=11,OK,C2@31.03,17.97	76.70	OK,OK,25=54=12,B1,C1@69.80,21.20	-19.37
SAFB2	HsaEX0056115	chr19:5616422-5616486	65	chr19:5621309,5616422-5616486,5616335	S	100.00	OK,OK,27=16=0,OK,S@43.00,0.00	100.00	LOW,LOW,19=11=0,OK,S@30.00,0.00	77.78	OK,OK,20=15=5,OK,S@31.11,8.89	83.67	OK,OK,21=20=4,OK,S@37.65,7.35	-19.28
ARFGAP1	HsaINT0011068	chr20:63281348-63282818	1471	chr20:63281291-63281347=63282819-63282851:+	IR	30.35	VLOW,VLOW,2.3=77,5=5=10,0.501@7.65,17.55	31.51	VLOW,VLOW,2.7=77,7=4=10,0.687@8.14,17.7	7.34	VLOW,VLOW,2.3=77,1=1=11,0.802@1.26,15.89	16.42	VLOW,LOW,2.3=77,5=1=12,0.452@3.69,18.81	-19.05
WTAP	HsaINT1046747	chr6:159748370-159753459	5090	chr6:159748191-159748369=159753460-159753614:+	IR	43.24	OK,OK,4.2=151,29=3=21,0.00866@22.92,30.08	42.86	VLOW,VLOW,1.4=151,14=7=14,0.045@15,20	25.37	OK,OK,1.4=151,11=6=25,0.102@10.66,31.34	22.63	OK,OK,1.9=151,30=1=53,0.000395@19.01,64.99	-19.05
CD164	HsaEX0013764	chr6:109370411-109370467	57	chr6:109376074,109370411-109370467,109369017	S	94.97	OK,OK,23=16=1,OK,S@37.99,2.01	93.54	LOW,LOW,17=13=1,OK,S@29.00,2.00	63.47	LOW,LOW,15=14=8,OK,S@23.48,13.52	86.97	SOK,SOK,56=41=7,OK,S@90.45,13.55	-19.03
PSME4	HsaEX0050654	chr2:53939956-53940000	45	chr2:53948421,53939956-53940000,53937540	S	95.12	OK,OK,16=23=1,OK,S@38.05,1.95	81.82	LOW,LOW,12=15=3,OK,S@24.55,5.45	62.50	VLOW,VLOW,9=11=6,OK,S@16.25,9.75	76.47	OK,OK,18=34=8,OK,S@45.88,14.12	-18.99
CEP95	HsaINT0029632	chr17:64508721-64510172	1452	chr17:64508592-64508720=64510173-64510280:+	IR	19.36	VLOW,VLOW,1.0=144,4=2=13,0.558@3.73,15.52	37.05	VLOW,VLOW,1.9=144,5=10=13,0.289@10.49,17.82	13.5	VLOW,VLOW,1.2=144,2=1=10,0.802@1.77,11.35	5.28	OK,OK,1.7=144,2=1=28,0.802@1.64,29.48	-18.81
SNHG1	HsaEX1038152	chr11:62854888-62854938	51	chr11:62855133,62854888-62854938,62854551	S	90.73	VLOW,LOW,12=11=1,OK,S@21.78,2.22	91.67	VLOW,LOW,14=12=1,OK,S@24.75,2.25	79.61	LOW,LOW,16=12=3,OK,S@24.68,6.32	65.22	LOW,LOW,28=10=8,OK,S@30.00,16.00	-18.79
BDP1	HsaEX1005618	chr5:71488474-71488571	98	chr5:71486627,71488474-71488571,71489404	S	17.10	LOW,LOW,0=1=16,Bn,S@2.91,14.09	20.25	VLOW,VLOW,0=1=13,Bn,S@2.83,11.16	0.00	LOW,OK,0=0=19,Bn,S@0.00,19.00	0.00	OK,OK,0=0=35,Bn,S@0.00,35.00	-18.68
B4GALNT4	HsaINT0016236	chr11:373117-373190	74	chr11:373026-373116=373191-373291:+	IR	25.71	OK,OK,5.6=25,4=14=26,0.382@11.31,32.69	19.51	OK,OK,4.2=25,4=12=33,0.501@9.56,39.44	2.44	OK,OK,0.0=25,0=1=20,0.714@0.51,20.49	5.45	SOK,SOK,1.4=25,2=10=104,0.133@6.32,109.68	-18.66
ACAD9	HsaINT0002148	chr3:128901350-128902552	1203	chr3:128901276-128901349=128902553-128902628:+	IR	18.18	LOW,LOW,4.4=151,4=4=18,0.952@4.73,21.27	21.21	VLOW,VLOW,0.9=151,4=3=13,0.558@4.24,15.76	0	VLOW,VLOW,0.9=151,0=0=11,0.714@0,11	2.22	OK,OK,0.9=151,1=0=22,0.714@0.51,22.49	-18.59
DIAPH1	HsaEX0019670	chr5:141529603-141529697	95	chr5:141534335,141529603-141529697,141529273	S	96.36	OK,OK,32=21=1,OK,S@52.03,1.97	94.12	LOW,LOW,17=15=1,OK,S@31.06,1.94	80.00	VLOW,VLOW,12=12=3,OK,S@21.60,5.40	73.33	OK,OK,29=15=8,OK,S@38.13,13.87	-18.58
R3HDM2	HsaEX0051536	chr12:57292572-57292649	78	chr12:57295399,57292572-57292649+57292662+57292667+57292721,57289040	C1	57.89	LOW,LOW,23=10=10,OK,S@24.89,18.11	67.99	OK,OK,30=15=9,OK,S@36.71,17.29	37.77	VLOW,VLOW,11=3=10,B1,C2@9.06,14.94	51.14	OK,SOK,44=24=27,OK,C1@48.58,46.42	-18.49
PSMC5	HsaEX6024163	chr17:63830809-63830935	127	chr17:63830501,63830809-63830935,63831036	S	100.00	OK,OK,28=24=0,OK,S@52.00,0.00	100.00	OK,OK,28=17=0,OK,S@45.00,0.00	74.82	VLOW,VLOW,16=7=4,B1,S@20.20,6.80	88.77	SOK,SOK,69=37=7,OK,S@100.31,12.69	-18.21
ATP5C1	HsaEX0006927	chr10:7796121-7796155	35	chr10:7788263,7796121-7796155,7797047	S	96.39	OK,OK,16=30=1,OK,S@45.30,1.70	88.01	VLOW,LOW,9=33=3,B1,C2@39.60,5.40	68.87	VLOW,LOW,8=25=8,B1,C2@28.24,12.76	79.22	SOK,SOK,32=96=18,B1,C2@115.66,30.34	-18.15
PAPOLG	HsaEX0045451	chr2:60794710-60794775	66	chr2:60794191,60794710-60794775,60794964	S	100.00	VLOW,VLOW,12=11=0,OK,S@23.00,0.00	90.48	VLOW,VLOW,11=8=1,OK,S@18.10,1.90	71.43	VLOW,VLOW,13=7=4,OK,S@17.14,6.86	82.86	LOW,LOW,19=10=3,OK,S@26.52,5.48	-18.09
LDB1	HsaINT0091125	chr10:102111537-102114405	2869	chr10:102114406-102114946=102111434-102111536:-	IR	21.43	VLOW,VLOW,1.4=151,3=3=11,0.677@3.64,13.36	24.14	VLOW,VLOW,2.5=151,2=5=11,0.679@4.35,13.65	6.67	VLOW,VLOW,2.1=151,1=1=14,0.802@1.07,14.93	2.86	OK,OK,2.3=151,1=1=34,0.802@1.03,34.97	-18.03
NBR1	HsaEX0041895	chr17:43202655-43202712	58	chr17:43201780,43202655-43202712,43203681	S	93.35	LOW,LOW,11=16=1,OK,C1@26.14,1.86	93.40	LOW,LOW,10=18=1,OK,C1@27.09,1.91	67.26	VLOW,VLOW,5=11=4,B1,C1@13.45,6.55	83.76	OK,OK,32=39=7,OK,C1@65.33,12.67	-17.87
SUN1	HsaINT0161818	chr7:842131-843205	1075	chr7:841946-842130=843206-843232:+	IR	25.25	VLOW,LOW,1.9=151,9=2=11,0.351@7.83,23.17	26.7	VLOW,LOW,3.7=151,11=1=10,0.235@8.08,22.17	7.84	VLOW,OK,1.6=151,2=1=13,0.927@2.02,23.76	8.4	LOW,OK,3.9=151,5=0=16,0.186@2.71,29.57	-17.86
MTMR4	HsaINT0106275	chr17:58504489-58504778	290	chr17:58504779-58504974=58504303-58504488:-	IR	29.73	VLOW,VLOW,2.8=151,8=3=13,0.611@7.14,16.86	35.48	VLOW,VLOW,3.5=151,5=6=10,0.762@7.45,13.55	14.29	VLOW,VLOW,3.2=151,4=0=12,0.26@2.29,13.71	15.25	OK,OK,1.9=151,6=3=25,0.588@5.18,28.82	-17.83
WDFY3	HsaEX0070923	chr4:84932270-84932363	94	chr4:84966209,84932127+84932270-84932363,84897010	C1	91.42	VLOW,VLOW,11=10=1,OK,C2@20.11,1.89	76.03	VLOW,VLOW,12=13=4,OK,C2@22.05,6.95	65.45	LOW,LOW,19=11=8,OK,C2@24.87,13.13	66.40	LOW,LOW,14=17=8,OK,C2@25.90,13.10	-17.79
SF1	HsaINT1041386	chr11:64765519-64765950	432	chr11:64765951-64766155=64764606-64765518:-	IR	56.52	OK,OK,29.9=151,28=24=20,0.996@40.69,31.31	52	OK,OK,20.2=151,23=16=18,0.968@29.64,27.36	32.44	OK,OK,13.2=151,16=9=26,0.851@16.55,34.48	40.51	SOK,SOK,51.9=151,41=23=47,0.706@44.97,66.03	-17.79
PPP4R3B	HsaEX0060427	chr2:55598704-55599039	336	chr2:55603978,55598416+55598704-55599039,55588956	S	86.68	LOW,LOW,15=12=2,OK,C1@25.14,3.86	88.49	VLOW,VLOW,11=5=1,B1,S@15.04,1.96	74.33	VLOW,VLOW,15=9=4,OK,S@20.81,7.19	65.31	LOW,LOW,17=14=8,OK,C1@25.47,13.53	-17.77
DNM1L	HsaEX0020446	chr12:32713209-32713371	163	chr12:32711015,32713209-32713371,32718643	S	100.00	VLOW,VLOW,9=14=0,OK,S@23.00,0.00	100.00	VLOW,VLOW,12=9=0,OK,S@21.00,0.00	91.30	VLOW,VLOW,12=9=1,OK,S@20.09,1.91	73.31	VLOW,VLOW,9=20=5,B1,C1@24.93,9.07	-17.69
SLTM	HsaEX0060203	chr15:58912563-58912610	48	chr15:58913499,58912563-58912610,58901287	C1	95.09	OK,OK,22=25=1,OK,S@45.64,2.36	100.00	LOW,OK,18=14=0,OK,S@32.00,0.00	73.18	VLOW,VLOW,7=12=3,B1,C1@16.10,5.90	86.90	OK,OK,24=25=3,OK,C2@45.19,6.81	-17.51
LBR	HsaINT0090933	chr1:225415333-225417983	2651	chr1:225417984-225418180=225415278-225415332:-	IR	24.68	VLOW,VLOW,2.3=151,3=6=14,0.588@5.72,17.46	27.43	VLOW,VLOW,3.9=151,5=4=12,0.918@5.81,15.37	12.35	LOW,LOW,0.9=151,2=3=18,0.677@2.86,20.29	4.75	OK,OK,2.1=151,2=0=20,0.51@1.05,21.01	-17.5
DOCK3	HsaEX0020570	chr3:51064448-51064596	149	chr3:50934077,51064448-51064596,51075356	C2	100.00	VLOW,VLOW,11=14=0,OK,S@25.00,0.00	100.00	VLOW,VLOW,8=21=0,B1,S@29.00,0.00	76.70	VLOW,VLOW,8=11=3,OK,S@16.87,5.13	88.35	OK,OK,18=41=4,B1,S@55.66,7.34	-17.47
B4GALNT1	HsaINT0016187	chr12:57629147-57630151	1005	chr12:57630152-57630332=57629048-57629146:-	IR	65.22	VLOW,VLOW,9.7=151,21=9=8,0.655@24.78,13.22	54.29	VLOW,VLOW,6.0=151,14=5=8,0.529@14.66,12.34	35.48	VLOW,VLOW,5.6=151,11=0=10,0.0247@7.45,13.55	49.21	LOW,LOW,12.5=151,23=8=16,0.455@23.13,23.87	-17.41
CHTOP	HsaINT0022568	chr1:153636654-153638294	1641	chr1:153636572-153636653=153638295-153638448:+	IR	54.55	VLOW,VLOW,31.4=29,13=11=10,0.442@18.55,15.45	53.85	VLOW,VLOW,35.0=29,11=10=9,0.221@16.16,13.85	41.67	VLOW,VLOW,14.5=29,11=9=14,0.909@14.17,19.83	31.96	OK,OK,49.5=29,12=19=33,0.0777@20.45,43.55	-17.39
EXOC7	HsaEX0023503	chr17:76088060-76088122	63	chr17:76088464,76088060-76088122,76087720	S	96.49	OK,OK,33=22=1,OK,S@54.03,1.97	93.10	VLOW,VLOW,13=14=1,OK,S@26.07,1.93	68.63	LOW,LOW,21=14=8,OK,S@29.51,13.49	86.49	OK,OK,41=23=5,OK,S@59.68,9.32	-17.23
SUGP2	HsaINT0161624	chr19:18994487-18995143	657	chr19:18995144-18995280=18992367-18994486:-	IR	46.67	VLOW,VLOW,10.7=151,15=6=12,0.608@15.4,17.6	45.45	VLOW,VLOW,6.3=151,10=10=12,0.857@14.54,17.46	34.88	VLOW,VLOW,5.3=151,11=4=14,0.565@10.12,18.88	22.81	OK,OK,8.6=151,8=5=22,0.815@7.98,27.02	-17.22
TIMM23	HsaEX1040797	chr10:45975454-45975512	59	chr10:45972730,45975454-45975512,45982523	S	84.31	OK,OK,18=25=4,OK,S@39.63,7.37	78.95	LOW,LOW,12=18=4,OK,S@26.84,7.16	57.69	LOW,LOW,18=12=11,OK,S@23.65,17.35	71.17	OK,OK,30=49=16,OK,S@67.61,27.39	-17.2
SLTM	HsaEX0060202	chr15:58913499-58913696	198	chr15:58916935,58913499-58913696,58912610	S	92.41	OK,OK,39=21=2,OK,S@57.29,4.71	92.76	OK,OK,29=18=2,OK,S@45.45,3.55	75.15	VLOW,VLOW,26=7=4,B1,C1@27.81,9.19	75.64	LOW,OK,60=14=11,B1,C1@64.29,20.71	-17.19
CHD2	HsaINT0034453	chr15:92900825-92901166	342	chr15:92900320-92900824=92901167-92901299:+	IR	45.16	LOW,LOW,9.5=151,6=22=17,0.272@20.32,24.68	38.86	OK,OK,9.0=151,9=19=22,0.741@19.44,30.59	23.29	OK,OK,5.3=151,9=8=28,0.815@10.48,34.52	26.39	OK,OK,9.5=151,15=23=53,0.668@24.01,66.99	-17.17
CELF2	HsaINT1007184	chr10:11314259-11321188	6930	chr10:11314139-11314258=11321189-11321386:+	IR	25.18	LOW,LOW,3.0=151,8=3=16,0.611@6.94,20.62	22.91	LOW,LOW,6.0=151,3=6=15,0.762@5.64,18.98	9.4	LOW,LOW,4.2=151,2=2=19,0.77@2.22,21.4	4.41	OK,OK,4.2=151,4=1=53,0.558@2.63,56.96	-17.14
ENTPD6	HsaINT0056536	chr20:25224158-25225204	1047	chr20:25224101-25224157=25225205-25225317:+	IR	26.83	LOW,LOW,2.1=151,1=10=15,0.133@6.98,19.02	32	LOW,LOW,1.4=151,8=8=17,0.223@10.56,22.44	8.11	LOW,LOW,1.4=151,0=3=17,0.364@1.62,18.38	16.46	OK,OK,2.1=151,2=11=33,0.235@7.57,38.43	-17.12
PACS2	HsaINT0119502	chr14:105384988-105385684	697	chr14:105384879-105384987=105385685-105385717:+	IR	26.35	OK,OK,2.3=151,8=5=20,0.422@9.31,26.01	25.83	VLOW,VLOW,1.9=151,6=3=14,0.588@6.32,18.13	4.86	LOW,LOW,2.1=151,2=0=19,0.51@1.05,20.51	13.1	OK,OK,2.8=151,6=2=28,0.762@4.91,32.6	-17.11
ZNF569	HsaEX0073969	chr19:37425868-37425963	96	chr19:37426252+37426256,37425868-37425963,37413931+37414419	S	100.00	VLOW,VLOW,11=13=0,OK,S@24.00,0.00	100.00	VLOW,VLOW,11=11=0,OK,S@22.00,0.00	88.24	LOW,LOW,11=19=2,OK,C1@28.24,3.76	77.78	OK,OK,31=25=8,OK,C1@49.78,14.22	-16.99
ACADVL	HsaINT0002207	chr17:7222303-7222666	364	chr17:7222177-7222302=7222667-7222865:+	IR	40	OK,OK,7.7=151,18=22=30,0.5@28,42	31.91	OK,OK,6.5=151,8=22=32,0.272@19.78,42.22	16.98	OK,OK,3.2=151,2=7=22,0.501@5.26,25.74	20.99	OK,OK,10.0=151,14=20=64,0.785@20.57,77.43	-16.97
BNIP3	HsaINT1005266	chr10:131968570-131970637	2068	chr10:131970638-131970787=131966455-131968569:-	IR	22.81	OK,OK,3.0=151,5=8=22,0.611@7.98,27.02	37.93	OK,OK,11.1=151,11=22=27,0.79@22.76,37.24	16.46	OK,OK,5.6=151,5=8=33,0.863@7.57,38.43	10.39	OK,OK,7.0=151,6=10=69,0.857@8.83,76.17	-16.94
CCNK	HsaEX0013662	chr14:99501356-99501413	58	chr14:99500871,99501356-99501413,99502207+99502232	S	94.12	LOW,LOW,15=17=1,OK,S@31.06,1.94	82.61	VLOW,VLOW,5=14=2,B1,S@17.35,3.65	69.23	VLOW,VLOW,6=12=4,OK,S@15.23,6.77	73.68	LOW,LOW,11=17=5,OK,S@24.31,8.69	-16.91
TSFM	HsaEX0067549	chr12:57792986-57793073	88	chr12:57787162,57792986-57793073,57796177	S	91.40	VLOW,VLOW,9=13=1,OK,S@21.02,1.98	89.61	VLOW,VLOW,5=13=1,B1,S@17.03,1.97	62.67	VLOW,VLOW,6=15=6,B1,S@16.92,10.08	84.60	LOW,LOW,13=33=4,B1,C1@42.30,7.70	-16.87
CDC42SE1	HsaINT0031753	chr1:151055127-151055676	550	chr1:151055677-151055993=151055016-151055126:-	IR	34.95	OK,OK,4.4=151,12=13=23,0.439@17.13,31.87	43.12	LOW,LOW,6.3=151,14=12=17,0.662@18.86,24.88	26.05	OK,OK,2.5=151,10=5=21,0.466@9.55,27.1	18.3	OK,OK,3.5=151,11=9=44,0.4@11.99,53.51	-16.85
UNC5A	HsaINT0177858	chr5:176874567-176877191	2625	chr5:176874264-176874566=176877192-176877279:+	IR	22.58	VLOW,VLOW,2.1=151,2=5=12,0.679@4.29,14.71	25	OK,OK,4.2=151,3=11=21,0.4@8.75,26.25	7.69	VLOW,VLOW,1.9=151,0=2=12,0.51@1.08,12.92	6.25	OK,OK,2.3=151,1=3=30,0.677@2.12,31.88	-16.82
WDFY3	HsaINT0181611	chr4:84808418-84809886	1469	chr4:84809887-84810344=84808334-84808417:-	IR	18.99	VLOW,VLOW,2.1=151,5=0=11,0.186@3.25,13.88	31.62	VLOW,VLOW,3.7=151,8=4=13,0.697@8.39,18.15	6.99	OK,OK,1.9=151,2=1=20,0.802@1.71,22.69	10.17	OK,OK,2.8=151,3=2=22,0.855@2.91,25.7	-16.72
GIT1	HsaEX6021800	chr17:29575812-29575898	87	chr17:29576078,29575812-29575898,29575703	S	95.56	OK,OK,24=19=1,OK,S@42.05,1.95	95.33	OK,OK,23=19=1,OK,S@40.99,2.01	69.91	VLOW,VLOW,12=7=4,OK,C1@16.08,6.92	87.55	OK,OK,52=34=6,OK,C1@80.55,11.45	-16.71
FN1	HsaEX0026100	chr2:215372113-215372300	188	chr2:215373322,215372109+215372113-215372300+215372375,215372015	S	92.86	OK,OK,26=26=2,OK,S@50.14,3.86	94.44	LOW,LOW,17=17=1,OK,S@33.05,1.95	84.00	VLOW,VLOW,8=13=2,OK,S@19.32,3.68	70.21	LOW,LOW,13=20=7,OK,S@28.08,11.92	-16.55
LHX2	HsaINT0091715	chr9:124012469-124013960	1492	chr9:124011610-124012468=124013961-124014163:+	IR	22.22	VLOW,VLOW,3.2=151,6=2=14,0.588@4.89,17.11	16.67	OK,OK,4.4=151,3=5=20,0.831@4.67,23.33	4.76	OK,OK,2.3=151,1=1=20,0.802@1.05,20.95	1.12	OK,OK,3.7=151,0=1=44,0.26@0.5,44.5	-16.51
HLTF	HsaINT0076522	chr3:149064867-149068239	3373	chr3:149068240-149068335=149064791-149064866:-	IR	38.89	VLOW,VLOW,3.0=151,8=6=11,0.611@9.72,15.28	25.59	VLOW,VLOW,3.7=151,5=4=13,0.918@5.65,16.44	12.36	VLOW,VLOW,1.9=151,4=0=14,0.26@2.25,15.93	19.15	OK,OK,3.9=151,6=6=25,0.873@7.15,30.18	-16.49
SEZ6L2	HsaEX0057561	chr16:29872705-29872743	39	chr16:29873240,29872705-29872743,29872526	S	57.33	OK,OK,20=19=15,OK,C1@30.96,23.04	45.56	LOW,LOW,11=15=16,OK,C1@19.14,22.86	35.33	LOW,LOW,7=12=18,OK,C1@13.07,23.93	34.62	OK,OK,16=11=26,OK,C1@18.35,34.65	-16.48
NCOA1	HsaEX0042045	chr2:24564295-24564430	136	chr2:24491602,24564295-24564430,24584476	C2	94.93	VLOW,LOW,9=25=1,B1,C2@33.23,1.77	94.86	LOW,LOW,10=22=1,OK,C2@31.30,1.70	83.25	VLOW,VLOW,6=22=3,B1,C2@25.81,5.19	73.85	LOW,LOW,12=42=9,B1,C2@46.53,16.47	-16.35
REC8	HsaINT0139074	chr14:24177384-24177464	81	chr14:24177353-24177383=24177465-24177541:+	IR	27.27	VLOW,OK,0.0=32,9=2=14,0.0126@9.74,25.99	26.32	OK,OK,1.1=32,12=4=21,0.0144@13.82,38.68	4.35	OK,OK,1.1=32,2=0=22,0.364@1.52,33.48	16.55	OK,OK,4.4=32,7=6=29,0.631@9.77,49.29	-16.35
ST6GAL1	HsaEX0062026	chr3:187042887-187042985	99	chr3:187038780+187038873,187042654+187042887-187042985+187043310,187051249	S	100.00	VLOW,VLOW,10=11=0,OK,S@21.00,0.00	100.00	VLOW,VLOW,10=7=0,OK,S@17.00,0.00	72.73	VLOW,VLOW,6=10=3,OK,S@13.82,5.18	94.59	LOW,LOW,10=25=1,B1,S@34.05,1.95	-16.34
FAM49B	HsaEX0024489	chr8:129879389-129879471	83	chr8:129903312,129879389-129879471,129871496	C1	66.95	VLOW,LOW,14=9=5,OK,C1@18.75,9.25	70.59	VLOW,LOW,8=14=4,OK,S@18.35,7.65	46.33	VLOW,VLOW,10=9=10,OK,C1@13.44,15.56	58.66	OK,OK,29=25=17,OK,C1@41.65,29.35	-16.28
FUBP1	HsaINT0066541	chr1:77968204-77969924	1721	chr1:77969925-77970015=77968165-77968203:-	IR	17.59	LOW,LOW,3.2=151,2=5=16,0.679@4.39,20.58	35.68	VLOW,VLOW,5.6=151,8=6=12,0.926@9.88,17.81	11.1	LOW,OK,3.5=151,3=2=19,0.855@2.88,23.09	9.63	OK,OK,6.7=151,3=6=41,0.687@5.24,49.17	-16.26
RRN3	HsaEX1035713	chr16:15083513-15083582	70	chr16:15084642,15083513-15083582,15080096	C1	100.00	VLOW,VLOW,13=14=0,OK,S@27.00,0.00	84.92	VLOW,VLOW,14=7=2,B1,S@19.53,3.47	75.73	VLOW,VLOW,13=12=4,OK,C1@21.96,7.04	76.77	OK,OK,22=23=7,OK,S@39.92,12.08	-16.21
ADGRB1	HsaINT0016422	chr8:142539414-142541940	2527	chr8:142539374-142539413=142541941-142542647:+	IR	30.82	VLOW,VLOW,1.2=151,6=3=10,0.36@6.18,13.88	18.42	VLOW,VLOW,0.2=151,3=2=11,0.364@3.1,13.74	8.33	VLOW,VLOW,0.2=151,2=0=11,0.51@1.15,12.64	8.49	LOW,LOW,1.6=151,2=1=16,0.802@1.71,18.41	-16.21
AKAP8L	HsaINT0006323	chr19:15397856-15399301	1446	chr19:15399302-15399410=15397714-15397855:-	IR	21.74	LOW,LOW,3.0=151,5=5=18,0.831@6.09,21.91	30.7	LOW,LOW,4.2=151,5=11=18,0.565@10.46,23.6	8.7	OK,OK,2.5=151,1=3=21,0.677@2.17,22.82	11.43	OK,OK,6.0=151,9=7=62,0.894@8.92,69.08	-16.16
MED13	HsaINT1022713	chr17:61995366-62010549	15184	chr17:62010550-62011233=61995152-61995365:-	IR	24.79	LOW,LOW,2.8=151,9=1=16,0.133@6.58,19.96	30.13	VLOW,VLOW,3.5=151,8=1=11,0.223@6.17,14.31	15.02	LOW,LOW,2.3=151,5=0=15,0.186@3.05,17.25	7.73	OK,OK,2.8=151,6=0=38,0.133@3.43,40.93	-16.08
GRB10	HsaEX0028556	chr7:50710875-50710990	116	chr7:50732272,50710875-50710990,50703908	C3	39.69	VLOW,VLOW,5=10=12,OK,C3@10.72,16.28	27.09	VLOW,VLOW,4=5=12,OK,C3@5.69,15.31	20.91	VLOW,VLOW,4=2=10,B1,C3@3.35,12.65	13.84	OK,OK,3=5=22,OK,C3@4.15,25.85	-16.01
HIF1A	HsaEX6071617	chr14:61721739-61721823	85	chr14:61721654,61721739-61721823,61726706	S	100.00	VLOW,VLOW,9=36=0,B1,S@45.00,0.00	100.00	LOW,LOW,10=33=0,B1,S@43.00,0.00	85.37	VLOW,VLOW,8=27=3,B1,S@32.44,5.56	82.64	OK,OK,16=44=6,B1,S@54.54,11.46	-16
RXRB	HsaINT1040780	chr6:33195703-33195906	204	chr6:33195907-33196036=33195570-33195702:-	IR	21.59	VLOW,VLOW,3.2=151,4=2=11,0.77@3.68,13.38	21.56	VLOW,VLOW,2.3=151,2=5=13,0.679@4.34,15.8	6.34	LOW,LOW,2.3=151,1=1=15,0.802@1.08,15.95	4.9	OK,OK,2.5=151,0=3=30,0.364@1.62,31.47	-15.95
PSMC2	HsaINT0133419	chr7:103347782-103353920	6139	chr7:103347524-103347781=103353921-103353958:+	IR	17.22	LOW,LOW,0.7=151,3=4=16,0.452@4.4,21.18	21.69	VLOW,VLOW,2.1=151,7=1=13,0.285@4.95,17.86	2.17	OK,OK,0.9=151,1=0=20,0.714@0.51,23.07	4.95	OK,OK,1.4=151,4=0=34,0.26@2.1,40.29	-15.89
CCSER2	HsaEX0024309	chr10:84499911-84499959	49	chr10:84477664,84499875+84499911-84499959+84500007,84513449	C1	30.40	LOW,LOW,5=8=15,OK,C1@8.51,19.49	22.44	VLOW,VLOW,5=3=14,OK,C1@4.94,17.06	8.88	LOW,LOW,0=3=16,Bn,C1@1.69,17.31	12.21	OK,OK,1=8=33,B2,C1@5.13,36.87	-15.87
CLK1	HsaINT0036425	chr2:200858090-200859679	1590	chr2:200859680-200859746=200857973-200858089:-	IR	29.17	LOW,LOW,3.8=121,9=5=17,0.697@9.04,21.96	24.59	OK,OK,6.1=121,9=6=23,0.894@9.34,28.66	16.28	LOW,LOW,3.5=121,4=3=18,0.892@4.07,20.93	5.73	OK,OK,4.6=121,8=1=74,0.223@4.76,78.24	-15.87
CLK3	HsaINT0036451	chr15:74622217-74622493	277	chr15:74622120-74622216=74622494-74622560:+	IR	14.36	LOW,LOW,3.5=151,4=1=15,0.558@2.88,17.15	21.59	VLOW,VLOW,3.5=151,4=2=11,0.77@3.68,13.38	0	VLOW,VLOW,2.3=151,0=0=10,0.51@0,10.03	4.38	OK,OK,3.0=151,2=1=33,0.677@1.58,34.54	-15.79
R3HDM2	HsaEX0051534	chr12:57297328-57297387	60	chr12:57298090,57297328-57297387,57296551	S	95.83	OK,OK,18=28=1,OK,S@45.04,1.96	88.24	LOW,LOW,15=15=2,OK,S@28.24,3.76	69.70	VLOW,VLOW,12=11=5,OK,S@19.52,8.48	82.80	OK,OK,37=40=8,OK,S@70.38,14.62	-15.78
RICTOR	HsaEX0053588	chr5:38962315-38962361	47	chr5:38962485,38962315-38962361,38960533	S	100.00	VLOW,VLOW,11=9=0,OK,S@20.00,0.00	100.00	VLOW,VLOW,7=16=0,B1,S@23.00,0.00	81.21	VLOW,VLOW,6=10=2,OK,S@14.62,3.38	87.33	VLOW,VLOW,5=20=2,B1,S@23.58,3.42	-15.73
KLHL24	HsaEX0034823	chr3:183643480-183643542	63	chr3:183635747+183635782+183635793,183643480-183643542,183650296	C1	75.24	LOW,LOW,16=15=5,OK,C1@27.09,8.91	66.96	VLOW,VLOW,7=14=5,OK,C1@17.41,8.59	55.04	LOW,LOW,14=16=12,OK,C1@23.12,18.88	55.73	OK,OK,36=22=23,OK,C1@45.14,35.86	-15.72
SETD2	HsaEX0057458	chr3:47105997-47106120	124	chr3:47113876,47105997-47106120,47098081	C2	100.00	LOW,LOW,11=16=0,OK,C3@27.00,0.00	93.55	VLOW,VLOW,5=24=1,B1,C3@28.07,1.94	77.78	VLOW,VLOW,7=21=4,B1,C3@24.89,7.11	84.38	OK,OK,18=36=5,OK,C3@49.78,9.22	-15.7
MARS	HsaEX0037947	chr12:57512303-57512353	51	chr12:57512103,57512236+57512303-57512353,57512751	S	96.88	OK,OK,31=33=1,OK,S@62.97,2.03	91.94	OK,OK,24=23=2,OK,S@45.05,3.95	73.00	LOW,LOW,23=10=6,B1,S@28.47,10.53	84.43	SOK,SOK,60=63=11,OK,S@113.14,20.86	-15.69
DMTF1	HsaINT0049016	chr7:87194829-87195030	202	chr7:87194684-87194828=87195031-87196332:+	IR	21.24	OK,OK,2.5=151,0=11=21,0.0247@6.87,25.46	32.45	LOW,LOW,4.4=151,7=10=18,0.631@11.45,23.84	15.72	OK,OK,2.8=151,1=7=22,0.285@4.75,25.46	6.58	OK,OK,2.5=151,2=6=58,0.588@4.35,61.82	-15.69
SETD3	HsaEX0057465	chr14:99461192-99461340	149	chr14:99463486,99461192-99461340,99459181+99459185	S	100.00	LOW,LOW,10=20=0,OK,S@30.00,0.00	88.24	VLOW,VLOW,8=22=2,B1,S@28.24,3.76	75.76	VLOW,VLOW,6=19=4,B1,S@21.97,7.03	81.13	LOW,LOW,10=33=5,B1,S@38.94,9.06	-15.68
WDR74	HsaINT0182589	chr11:62834528-62835430	903	chr11:62835431-62835532=62834427-62834527:-	IR	12.5	OK,OK,1.2=151,2=6=28,0.36@4.5,31.5	24.44	LOW,LOW,1.2=151,4=7=17,0.285@6.84,21.16	2.86	LOW,LOW,0.2=151,1=0=17,0.714@0.51,17.49	2.78	OK,OK,1.4=151,2=0=35,0.51@1.03,35.97	-15.65
TRAPPC11	HsaINT0024156	chr4:183697836-183701696	3861	chr4:183697679-183697835=183701697-183701808:+	IR	18.52	VLOW,VLOW,2.8=151,3=2=11,0.855@2.96,13.04	33.33	VLOW,VLOW,3.9=151,6=7=13,0.82@8.67,17.33	11.76	LOW,LOW,4.2=151,2=2=15,0.77@2.23,16.77	8.77	OK,OK,1.9=151,4=1=26,0.558@2.72,28.28	-15.65
ATP2C1	HsaEX0006911	chr3:130979249-130979419	171	chr3:130975488,130979249-130979419,130980582+130980586	S	100.00	LOW,LOW,11=17=0,OK,S@28.00,0.00	100.00	VLOW,VLOW,6=10=0,OK,C1@16.00,0.00	73.91	VLOW,VLOW,12=5=3,B1,C1@14.78,5.22	94.88	OK,OK,20=54=2,B1,S@72.11,3.89	-15.61
MYO6	HsaEX0041241	chr6:75895231-75895260	30	chr6:75892690,75895231-75895260,75907605	C2	14.05	VLOW,VLOW,0=2=10,Bn,C1@1.69,10.31	17.17	VLOW,VLOW,2=1=11,OK,S@2.40,11.60	0.00	VLOW,VLOW,0=0=10,Bn,S@0.00,10.00	0.00	OK,OK,0=0=24,Bn,S@0.00,24.00	-15.61
USP4	HsaEX0069862	chr3:49300467-49300691	225	chr3:49302384,49300467-49300691,49298635	S	93.21	LOW,LOW,15=12=1,OK,S@26.10,1.90	100.00	VLOW,VLOW,10=6=0,OK,S@16.00,0.00	79.52	VLOW,VLOW,10=13=3,OK,S@20.68,5.32	82.46	OK,OK,21=16=4,OK,S@33.81,7.19	-15.61
TADA2A	HsaEX0063404	chr17:37437767-37437829	63	chr17:37427009,37437738+37437767-37437829+37437922+37437958+37437962,37440505+37440509	S	100.00	VLOW,VLOW,9=17=0,OK,S@26.00,0.00	100.00	VLOW,VLOW,5=11=0,B1,S@16.00,0.00	81.68	VLOW,VLOW,8=11=3,B1,C1@17.97,4.03	87.23	LOW,LOW,12=29=3,B1,S@38.38,5.62	-15.54
SPIDR	HsaEX0033476	chr8:47407861-47407961	101	chr8:47396626,47407861-47407961,47440323	C1	93.57	LOW,LOW,22=10=1,B1,C1@30.88,2.12	100.00	LOW,LOW,18=11=0,OK,S@29.00,0.00	82.22	VLOW,VLOW,12=7=2,OK,C2@17.27,3.73	80.36	LOW,LOW,24=10=4,B1,C1@30.54,7.46	-15.49
PHIP	HsaINT0124132	chr6:79017387-79017482	96	chr6:79017483-79017583=79017346-79017386:-	IR	13.64	LOW,LOW,2.2=47,0=6=19,0.133@3.51,22.23	32	LOW,LOW,4.5=47,2=15=18,0.0969@11.51,24.46	8.5	LOW,LOW,3.7=47,1=2=16,0.558@1.66,17.87	6.31	OK,OK,2.2=47,2=6=59,0.588@4.35,64.56	-15.42
SRSF11	HsaINT1042966	chr1:70221840-70228421	6582	chr1:70221612-70221839=70228422-70228555:+	IR	25	LOW,LOW,4.2=151,7=3=15,0.687@6.25,18.75	30	VLOW,VLOW,5.8=151,12=0=14,0.0176@7.8,18.2	15.38	VLOW,VLOW,3.7=151,4=0=11,0.26@2.31,12.69	8.8	OK,OK,3.0=151,11=0=57,0.0247@5.98,62.02	-15.41
SAP130	HsaEX0056190	chr2:127977985-127978089	105	chr2:127986785,127977985-127978089,127955344	S	79.31	VLOW,VLOW,17=6=3,B1,S@20.62,5.38	71.43	VLOW,VLOW,10=5=3,OK,S@12.86,5.14	55.56	VLOW,VLOW,15=5=8,B1,S@15.56,12.44	64.38	OK,OK,32=15=13,B1,S@38.63,21.37	-15.4
RNF19B	HsaEX0054005	chr1:32938397-32938528	132	chr1:32942252,32938397-32938528,32937259+32937309	S	93.75	VLOW,VLOW,9=21=1,B1,S@29.06,1.94	100.00	VLOW,VLOW,5=18=0,B1,S@23.00,0.00	85.71	VLOW,VLOW,9=15=2,OK,S@22.28,3.72	77.27	LOW,LOW,10=24=5,B1,S@30.14,8.86	-15.39
FZD3	HsaINT0066853	chr8:28551752-28555737	3986	chr8:28551603-28551751=28555738-28555971:+	IR	17.65	VLOW,VLOW,0.9=151,5=1=14,0.452@3.53,16.47	15.38	VLOW,VLOW,0.9=151,2=2=11,0.802@2.31,12.69	0	VLOW,VLOW,0.7=151,0=0=13,0.714@0,13	2.7	LOW,LOW,0.2=151,1=0=18,0.714@0.51,18.49	-15.17
RNF181	HsaINT0141486	chr2:85596650-85596821	172	chr2:85596519-85596649=85596822-85596931:+	IR	20	VLOW,VLOW,2.3=123,2=4=12,0.77@3.6,14.4	18.75	VLOW,VLOW,2.9=123,2=4=13,0.77@3.56,15.44	5	LOW,LOW,1.7=123,2=0=19,0.51@1.05,19.95	3.45	OK,OK,3.1=123,2=0=28,0.364@1.04,28.96	-15.16
EML4	HsaINT0056011	chr2:42282973-42284633	1661	chr2:42282823-42282972=42284634-42284703:+	IR	17.24	VLOW,VLOW,2.5=151,3=2=12,0.855@2.93,14.07	13.04	VLOW,VLOW,1.4=151,1=2=10,0.802@1.7,11.3	0	VLOW,VLOW,0.5=151,0=0=11,1@0,11	0	VLOW,VLOW,0.9=151,0=0=14,0.714@0,14	-15.14
ZEB2	HsaEX0072576	chr2:144424796-144424867	72	chr2:144429769,144424796-144424867,144405024	S	87.69	OK,OK,48=19=4,B1,S@62.26,8.74	77.00	LOW,OK,34=13=6,B1,S@40.81,12.19	67.35	OK,OK,26=17=9,OK,S@35.02,16.98	67.08	SOK,SOK,98=28=26,B1,S@101.96,50.04	-15.12
PPIP5K2	HsaEX1029070	chr5:103176866-103176910	45	chr5:103173972,103176767+103176866-103176910,103177667	S	27.27	LOW,LOW,3=9=16,B1,S@7.64,20.36	17.65	VLOW,VLOW,2=4=14,OK,S@3.53,16.47	6.25	LOW,LOW,1=1=15,OK,S@1.06,15.94	8.47	OK,OK,3=2=27,OK,S@2.71,29.29	-15.1
MPDZ	HsaEX0039905	chr9:13115248-13115334	87	chr9:13119502,13115081+13115248-13115334,13114021	S	100.00	VLOW,VLOW,14=5=0,B1,S@19.00,0.00	90.66	VLOW,VLOW,12=7=1,OK,S@18.13,1.87	84.34	VLOW,VLOW,12=9=2,OK,S@19.40,3.60	76.15	VLOW,VLOW,16=9=4,OK,S@22.08,6.92	-15.08
BAZ2B	HsaINT0016825	chr2:159400665-159404848	4184	chr2:159404849-159404910=159400599-159400664:-	IR	17.83	VLOW,VLOW,2.5=151,6=0=13,0.133@3.53,16.29	22.97	VLOW,VLOW,2.3=151,6=1=11,0.36@4.3,14.43	5.2	LOW,LOW,1.6=151,1=1=17,0.802@1.05,19.18	5.52	OK,OK,1.6=151,3=0=24,0.364@1.58,27.07	-15.04
TCAF1	HsaALTD0002373-3/4	chr7:143857074-143857350	26	chr7:143857100+143857078+143857074+143857056-143857350,143854142	Alt5	20.00	LOW,LOW,100.00,6=30=0,S@6.00,24.00	19.44	LOW,LOW,100.00,7=36=0,S@7.00,29.00	39.13	VLOW,VLOW,100.00,9=23=0,S@9.00,14.00	30.34	OK,OK,100.00,27=89=0,S@27.00,62.00	15.01
RAB1A	HsaEX0051582	chr2:65090983-65091078	96	chr2:65097971,65090983-65091078,65089070	S	85.06	OK,OK,34=28=6,OK,S@57.84,10.16	74.47	OK,OK,20=20=8,OK,C1@35.75,12.25	96.39	OK,OK,32=18=1,OK,S@49.16,1.84	93.32	SOK,SOK,77=71=6,OK,S@143.71,10.29	15.08
SCRIB	HsaEX0056634	chr8:143804568-143804825	258	chr8:143804934+143804955,143804568-143804825,143804156	S	89.39	VLOW,VLOW,5=12=1,B1,S@16.09,1.91	80.31	VLOW,VLOW,5=11=2,B1,S@14.46,3.54	100.00	VLOW,VLOW,11=11=0,OK,S@22.00,0.00	100.00	OK,OK,19=33=0,OK,S@52.00,0.00	15.15
CLIP2	HsaEX0015683	chr7:74372932-74373036	105	chr7:74364315,74372932-74373036,74375887	S	53.85	OK,OK,21=21=18,OK,S@32.31,27.69	55.93	LOW,LOW,17=16=13,OK,C1@25.73,20.27	62.07	LOW,LOW,19=17=11,OK,S@29.17,17.83	78.02	OK,OK,36=35=10,OK,S@63.20,17.80	15.16
TAF1C	HsaEX0063454	chr16:84183076-84183149	74	chr16:84183244,84183072+84183076-84183149,84182440	S	83.33	VLOW,VLOW,13=7=2,OK,S@18.33,3.67	80.00	VLOW,VLOW,6=10=2,OK,C1@14.40,3.60	100.00	VLOW,VLOW,7=10=0,OK,C1@17.00,0.00	93.75	LOW,LOW,16=14=1,OK,S@29.06,1.94	15.22
SHF	HsaEX0058177	chr15:45173576-45173716	141	chr15:45175219+45175223,45173576-45173716,45172318	C2	28.70	OK,OK,12=9=26,OK,C2@13.49,33.51	46.60	VLOW,VLOW,11=10=12,OK,C2@15.38,17.62	52.16	VLOW,VLOW,9=13=10,OK,C2@16.69,15.31	53.58	LOW,LOW,30=7=16,B1,C1@28.40,24.60	15.22
CSNK2A2	HsaEX0017564	chr16:58174451-58174510	60	chr16:58184260,58174451-58174510,58168693	S	86.05	LOW,LOW,18=19=3,OK,C1@34.42,5.58	73.33	LOW,LOW,17=16=6,OK,C1@28.60,10.40	91.67	OK,OK,25=19=2,OK,S@42.17,3.83	98.21	SOK,SOK,58=52=1,OK,S@109.01,1.99	15.25
BEX4	HsaEX0008047	chrX:103215682-103215764	83	chrX:103215238,103215655+103215682-103215764,103216149	S	77.98	OK,OK,16=45=9,B1,S@54.59,15.41	67.77	VLOW,VLOW,6=34=10,B2,S@33.88,16.12	83.86	LOW,LOW,14=26=4,OK,S@36.90,7.10	92.42	SOK,SOK,17=99=5,B2,S@111.83,9.17	15.26
GSE1	HsaEX0033484	chr16:85665976-85666347	372	chr16:85663614,85665976-85666347,85668140	C2	92.00	OK,OK,24=22=2,OK,C2@44.16,3.84	75.00	OK,OK,20=16=6,OK,C2@31.50,10.50	100.00	OK,OK,25=25=0,OK,C2@50.00,0.00	97.75	OK,OK,44=43=1,OK,C2@86.02,1.98	15.38
GUCY1A2	HsaINT0073602	chr11:106978741-106986069	7329	chr11:106986070-106986131=106978619-106978740:-	IR	0	LOW,LOW,0.2=151,0=0=18,1@0,18	0	LOW,LOW,0.0=151,0=0=15,1@0,15	15.38	VLOW,VLOW,0.0=151,3=1=11,0.364@2.31,12.69	15.38	VLOW,VLOW,0.0=151,4=0=11,0.26@2.31,12.69	15.38
PICALM	HsaINT0124673	chr11:85990379-85996825	6447	chr11:85996826-85996929=85990250-85990378:-	IR	23.45	OK,OK,2.6=121,0=16=26,0.00459@9.88,32.24	25.68	OK,OK,5.2=121,1=15=23,0.034@10.05,29.09	38.7	VLOW,VLOW,2.0=121,0=14=11,0.009@9.71,15.38	41.62	OK,OK,4.0=121,0=40=28,1.43e-06@28.33,39.73	15.6
BCAR1	HsaEX0007813	chr16:75236882-75236998	117	chr16:75237183,75236828+75236882-75236998,75235986	S	78.18	VLOW,VLOW,13=9=3,OK,S@19.55,5.45	81.49	VLOW,VLOW,11=7=2,OK,C1@16.30,3.70	100.00	VLOW,VLOW,11=13=0,OK,S@24.00,0.00	90.97	LOW,LOW,28=13=2,B1,S@39.12,3.88	15.64
HUWE1	HsaEX1017290	chrX:53625786-53626028	243	chrX:53627410,53625786-53626028+53626034,53625258	S	62.79	OK,OK,26=28=16,OK,S@43.95,26.05	69.05	OK,OK,27=31=13,OK,S@49.03,21.97	77.46	OK,OK,21=34=8,OK,S@48.80,14.20	85.71	SOK,SOK,27=81=9,B1,S@100.28,16.72	15.66
CLK1	HsaEX0015694	chr2:200857718-200857884	167	chr2:200857973,200857718-200857884,200856985	S	78.57	VLOW,VLOW,8=14=3,OK,S@19.64,5.36	90.00	VLOW,VLOW,5=13=1,B1,C1@17.10,1.90	100.00	VLOW,VLOW,13=13=0,OK,C1@26.00,0.00	100.00	VLOW,VLOW,6=24=0,B1,C1@30.00,0.00	15.72
KALRN	HsaALTA1038753-2/2	chr3:124633849-124633953	3	chr3:124632703,124633852+124633849-124633953	Alt3	50.00	LOW,LOW,100.00,15=30=0,S@15.00,15.00	50.00	VLOW,VLOW,100.00,10=20=0,S@10.00,10.00	62.50	VLOW,VLOW,100.00,10=16=0,S@10.00,6.00	68.97	LOW,LOW,100.00,20=29=0,S@20.00,9.00	15.73
FUBP3	HsaEX0026573	chr9:130634667-130634738	72	chr9:130632278,130634667-130634738,130635999	S	75.00	LOW,LOW,18=12=5,OK,S@26.25,8.75	67.44	VLOW,VLOW,20=9=7,B1,C1@24.28,11.72	86.67	VLOW,VLOW,19=7=2,B1,C1@24.27,3.73	87.30	LOW,LOW,43=12=4,B1,C1@51.51,7.49	15.76
PACSIN2	HsaEX0045194	chr22:42912021-42912157	137	chr22:43015021,42912021-42912157,42893613	S	78.55	LOW,LOW,13=24=5,OK,S@32.99,9.01	71.13	VLOW,VLOW,12=13=5,OK,S@21.34,8.66	93.68	LOW,LOW,11=19=1,OK,S@29.04,1.96	87.61	OK,OK,44=28=5,OK,S@67.46,9.54	15.81
DAZAP1	HsaALTA1005425-2/2	chr19:1434737-	3	chr19:1432690,1434740+1434737-	Alt3	68.75	LOW,LOW,100.00,22=32=0,S@22.00,10.00	67.86	LOW,LOW,100.00,19=28=0,S@19.00,9.00	84.62	LOW,LOW,100.00,22=26=0,S@22.00,4.00	83.61	OK,OK,100.00,51=61=0,S@51.00,10.00	15.81
BAG6	HsaALTD0000659-1/2	chr6:31652247-31652323	0	chr6:31652247+31652235-31652323,31651776	Alt5	78.00	OK,OK,52.79,31=40=36,S@31.20,8.80	79.31	LOW,LOW,62.47,26=33=20,S@26.17,6.83	94.88	VLOW,VLOW,49.15,18=19=20,S@18.03,0.97	94.07	OK,OK,60.61,77=82=54,S@77.14,4.86	15.81
CTB-50L17.10	HsaALTA1043658-1/2	chr19:4493706-4493762	0	chr19:4491835,4493706+4493703-4493762	Alt3	8.82	LOW,LOW,100.00,3=34=0,S@3.00,31.00	0.00	LOW,LOW,100.00,0=29=0,S@0.00,29.00	20.00	VLOW,VLOW,100.00,4=20=0,S@4.00,16.00	20.59	LOW,LOW,100.00,7=34=0,S@7.00,27.00	15.89
ITGB1BP1	HsaEX0032438	chr2:9407449-9407584	136	chr2:9408113,9407430+9407449-9407584+9407598,9406905	S	88.71	LOW,LOW,16=15=2,OK,S@29.27,3.73	76.69	LOW,LOW,15=11=4,OK,S@23.01,6.99	100.00	LOW,LOW,16=13=0,OK,S@29.00,0.00	97.23	OK,OK,29=40=1,OK,S@68.06,1.94	15.92
SENP3	HsaEX0057198	chr17:7565717-7565764	48	chr17:7565587,7565695+7565717-7565764,7566927	S	76.69	LOW,LOW,11=15=4,OK,C1@23.01,6.99	78.81	VLOW,VLOW,11=11=3,OK,S@19.70,5.30	100.00	VLOW,VLOW,11=7=0,OK,S@18.00,0.00	87.66	OK,OK,21=21=3,OK,S@39.45,5.55	16.08
NFIC	HsaEX0042741	chr19:3456550-3456635	86	chr19:3453916,3456550-3456635,3462752	C2	63.58	LOW,LOW,20=11=9,OK,C3@25.43,14.57	55.61	VLOW,VLOW,16=9=10,OK,C3@19.46,15.54	76.17	LOW,LOW,22=10=5,B1,C3@28.18,8.82	75.22	OK,OK,24=30=9,OK,C2@47.39,15.61	16.1
PLEC	HsaEX0048199	chr8:143937749-143937784	36	chr8:143938151,143937749-143937784,143937242	S	19.93	LOW,LOW,0=7=16,Bn,S@4.58,18.42	10.20	VLOW,VLOW,0=2=10,Bn,S@1.22,10.78	29.64	VLOW,VLOW,2=6=11,B1,S@5.63,13.37	32.78	VLOW,VLOW,0=12=14,Bl,S@8.52,17.48	16.15
HUWE1	HsaALTD0003156-2/2	chrX:53543841-53543968	45	chrX:53543886+53543841-53543968,53542539	Alt5	62.22	OK,OK,100.00,28=45=0,S@28.00,17.00	59.38	LOW,LOW,93.60,19=32=2,S@19.00,13.00	76.19	VLOW,VLOW,100.00,16=21=0,S@16.00,5.00	77.78	OK,OK,97.63,35=45=1,S@35.00,10.00	16.18
SYNE2	HsaEX0063188	chr14:64215286-64215354	69	chr14:64214470,64215286-64215354,64216248	S	88.89	VLOW,VLOW,23=9=2,B1,S@30.22,3.78	73.68	VLOW,VLOW,21=7=5,B1,S@24.31,8.69	100.00	VLOW,VLOW,13=6=0,B1,S@19.00,0.00	95.35	VLOW,VLOW,35=6=1,B2,S@40.05,1.95	16.39
SFSWAP	HsaALTD1002833-3/3	chr12:131714071-131714240	47	chr12:131714071-131714193+131714235+131714240,131714822	Alt5	70.93	LOW,LOW,100.00,23=33=0,S@23.41,9.59	65.34	LOW,LOW,100.00,16=25=0,S@16.34,8.67	82.68	VLOW,VLOW,100.00,18=22=0,S@18.19,3.81	86.42	OK,OK,100.00,48=56=0,S@48.40,7.60	16.41
IWS1	HsaALTD1031201-2/3	chr2:127489818-127489943	14	chr2:127489832+127489818+127489812-127489943,127489235	Alt5	0.00	VLOW,VLOW,100.00,0=21=0,S@0.00,21.00	0.00	VLOW,VLOW,100.00,0=16=0,S@0.00,16.00	10.00	VLOW,VLOW,100.00,2=20=0,S@2.00,18.00	22.86	LOW,LOW,100.00,8=35=0,S@8.00,27.00	16.43
GOLGB1	HsaEX0028001	chr3:121722262-121722378	117	chr3:121726913,121722262-121722378,121719753	C3	77.97	VLOW,LOW,10=9=2,OK,C2@16.37,4.63	89.11	VLOW,LOW,14=10=1,OK,C3@22.28,2.72	100.00	VLOW,VLOW,8=10=0,B1,C2@18.00,0.00	100.00	OK,OK,21=23=0,OK,C3@44.00,0.00	16.46
APC	HsaEX0005096	chr5:112834951-112835165	215	chr5:112828972,112834951-112835165,112837553	S	85.86	OK,OK,29=29=5,OK,S@54.09,8.91	78.97	OK,OK,21=22=6,OK,S@38.70,10.30	100.00	OK,OK,16=21=0,OK,S@37.00,0.00	97.88	OK,OK,40=48=1,OK,S@87.11,1.89	16.53
RBFOX3	HsaEX0052571	chr17:79104073-79104126	54	chr17:79106651,79103953+79104005+79104073-79104126,79101644	C2	78.57	VLOW,VLOW,17=5=3,B1,S@19.64,5.36	76.51	LOW,LOW,16=10=4,OK,C2@22.95,7.05	100.00	VLOW,VLOW,11=7=0,OK,C1@18.00,0.00	88.24	VLOW,VLOW,36=9=3,B1,C1@42.36,5.64	16.58
GAK	HsaEX0026833	chr4:913607-913668	62	chr4:932043,913607-913668,904774+904779	C3	81.83	VLOW,VLOW,13=14=3,OK,C2@24.55,5.45	70.37	VLOW,VLOW,10=9=4,OK,C2@16.19,6.81	91.67	VLOW,VLOW,11=11=1,OK,C3@21.08,1.92	93.76	OK,OK,33=27=2,OK,C2@58.13,3.87	16.62
	HsaEX1000292	chr15:82477203-82477298	96	chr15:82477394,82477203-82477298,82477123	S	72.25	OK,OK,44=20=12,B1,S@54.91,21.09	68.43	VLOW,VLOW,49=9=13,B2,S@48.59,22.41	79.86	LOW,LOW,39=10=6,B1,S@43.92,11.08	94.21	SOK,SOK,117=17=4,B2,S@130.01,7.99	16.69
XPO7	HsaALTD0007254-2/2	chr8:21971881-21971968	27	chr8:21971881-21971941+21971968,21974670	Alt5	4.17	VLOW,LOW,95.47,1=24=1,S@1.00,23.00	0.00	VLOW,VLOW,82.42,0=16=3,S@0.00,16.00	27.78	VLOW,VLOW,72.50,5=18=6,S@5.00,13.00	9.84	OK,OK,85.62,6=61=9,S@6.00,55.00	16.73
SMARCA4	HsaALTA1023070-2/2	chr19:10984121-10984373	3	chr19:10961174,10984124+10984121-10984373	Alt3	50.71	OK,OK,100.00,34=67=0,C1@33.98,33.02	49.13	OK,OK,100.00,29=59=0,S@28.99,30.01	59.12	OK,OK,100.00,26=44=0,C1@26.01,17.99	74.46	SOK,SOK,100.00,137=184=0,S@137.01,46.99	16.87
LARP1	HsaALTD0003552-4/4	chr5:154793800-154794000	99	chr5:154793800-154793901+154793910+154793922+154794000,154794100	Alt5	56.26	LOW,LOW,91.39,19=33=3,S@18.57,14.43	61.26	LOW,LOW,93.90,20=32=2,S@19.60,12.40	73.52	LOW,LOW,88.50,24=32=4,S@23.53,8.47	77.82	OK,OK,86.69,43=55=8,S@42.80,12.20	16.91
RALGPS1	HsaEX0052091	chr9:127210698-127210778	81	chr9:127195217,127210695+127210698-127210778,127212131	C2	73.34	LOW,LOW,13=21=6,OK,C2@29.34,10.66	67.48	VLOW,VLOW,5=21=6,B1,C1@21.59,10.41	92.86	VLOW,VLOW,8=18=1,B1,C1@25.07,1.93	81.84	VLOW,VLOW,6=30=4,B1,C1@32.74,7.26	16.94
EP400	HsaALTD0002243-2/2	chr12:131979697-131979793	9	chr12:131979697-131979784+131979793,131982093	Alt5	59.65	VLOW,VLOW,100.00,14=23=0,C3@13.72,9.28	54.14	VLOW,VLOW,100.00,11=20=0,C2@10.83,9.17	65.80	VLOW,LOW,100.00,16=24=0,C3@15.79,8.21	81.91	LOW,LOW,100.00,24=29=0,C3@23.75,5.25	16.96
CHD4	HsaINT0034548	chr12:6583114-6583197	84	chr12:6583198-6583375=6583027-6583113:-	IR	35.85	LOW,LOW,15.0=35,8=11=17,0.815@12.91,23.09	34.55	LOW,LOW,11.0=35,10=9=18,0.965@12.78,24.22	44.83	LOW,LOW,14.0=35,20=6=16,0.354@18.83,23.17	59.55	OK,OK,18.0=35,29=24=18,0.946@42.28,28.72	16.99
CSNK2A2	HsaEX0017563	chr16:58184260-58184310	51	chr16:58196733,58184260-58184310,58174510	C3	72.22	LOW,LOW,10=16=5,OK,C2@22.39,8.61	73.68	LOW,LOW,10=18=5,OK,C2@24.31,8.69	88.89	VLOW,VLOW,7=25=2,B1,C2@30.22,3.78	91.01	OK,OK,26=55=4,B1,C2@77.36,7.64	17
TRA2B	HsaEX0066781	chr3:185931577-185931852	276	chr3:185937825,185931455+185931577-185931852,185926734	C1	53.57	VLOW,VLOW,22=8=13,B1,C1@23.04,19.96	62.79	VLOW,VLOW,18=9=8,OK,C1@21.98,13.02	69.81	OK,OK,21=16=8,OK,C1@31.41,13.59	80.70	SOK,SOK,70=22=11,B1,S@83.12,19.88	17.07
DAB1	HsaEX0018423	chr1:57010680-57010790	111	chr1:57011145,57010680-57010790,56998128	S	86.36	LOW,LOW,11=27=3,B1,S@35.41,5.59	78.95	LOW,LOW,15=15=4,OK,S@26.84,7.16	100.00	VLOW,VLOW,6=10=0,OK,S@16.00,0.00	100.00	OK,OK,15=47=0,B1,S@62.00,0.00	17.34
SLC16A14	HsaEX0058714	chr2:230049761-230049904	144	chr2:230059035+230059094,230049761-230049904,230046722	C1	48.43	VLOW,VLOW,16=8=13,OK,C2@17.92,19.08	61.62	VLOW,VLOW,14=8=7,OK,C1@17.87,11.13	73.96	LOW,LOW,15=18=6,OK,C1@28.84,10.16	70.77	OK,OK,59=22=17,B1,C1@69.35,28.65	17.34
ZC3H7B	HsaEX0072280	chr22:41332171-41332227	57	chr22:41330103+41330107,41332171-41332227,41338313	S	87.50	LOW,LOW,31=11=3,B1,S@39.38,5.62	77.78	LOW,LOW,24=11=5,B1,S@31.11,8.89	100.00	LOW,LOW,19=14=0,OK,S@33.00,0.00	100.00	OK,OK,56=39=0,OK,S@95.00,0.00	17.36
KIAA1598	HsaEX0034191	chr10:116901765-116901957	193	chr10:116906627,116901765-116901957,116886566	C1	51.13	OK,OK,24=25=20,OK,C2@35.28,33.72	55.21	OK,OK,21=28=17,OK,C2@36.44,29.56	70.31	OK,OK,25=25=9,OK,C1@41.48,17.52	70.86	SOK,SOK,85=97=32,OK,C1@151.64,62.36	17.42
ENTPD6	HsaEX0022556	chr20:25207079-25207397	319	chr20:25195867,25207076+25207079-25207397+25207522,25209849	C2	69.37	VLOW,VLOW,6=16=5,B1,C1@18.73,8.27	67.31	VLOW,VLOW,9=11=5,OK,C2@16.83,8.17	90.26	VLOW,VLOW,5=13=1,B1,C1@17.15,1.85	81.40	OK,OK,21=30=6,OK,C1@46.40,10.60	17.49
SLTM	HsaEX0060200	chr15:58932356-58932443	88	chr15:58933404,58932356-58932443,58916999	S	81.52	LOW,LOW,10=16=3,OK,C1@23.64,5.36	78.68	VLOW,VLOW,13=8=3,OK,S@18.88,5.12	100.00	LOW,LOW,11=16=0,OK,C1@27.00,0.00	95.60	OK,OK,15=25=1,OK,S@39.20,1.80	17.7
KMT2C	HsaEX0039507	chr7:152195522-152195569	48	chr7:152195907,152195522-152195569,152194568	C1	22.73	LOW,LOW,4=6=17,OK,S@6.14,20.86	19.23	OK,OK,5=5=21,OK,C1@5.96,25.04	42.22	VLOW,VLOW,8=11=13,OK,C1@13.51,18.49	35.21	OK,OK,9=16=23,OK,S@16.90,31.10	17.74
TNC	HsaEX0066149	chr9:115062917-115063189	273	chr9:115063796,115062917-115063189,115060002	S	76.94	OK,OK,21=21=6,OK,S@36.93,11.07	77.91	LOW,LOW,11=19=4,OK,S@26.49,7.51	92.53	VLOW,LOW,12=14=1,OK,C1@24.98,2.02	97.91	SOK,SOK,44=55=1,OK,S@97.91,2.09	17.8
ZMIZ2	HsaEX0072863	chr7:44760151-44760228	78	chr7:44759311+44759460,44760151-44760228,44760425	S	24.24	OK,OK,9=7=25,OK,S@9.94,31.06	23.08	LOW,LOW,4=5=15,OK,S@5.54,18.46	37.02	VLOW,VLOW,7=10=14,OK,S@11.48,19.52	46.07	OK,OK,24=17=24,OK,S@29.95,35.05	17.89
KDM5C	HsaALTA0004487-2/2	chrX:53217143-53217277	3	chrX:53217796,53217143-53217274+53217277	Alt3	62.07	LOW,LOW,100.00,18=29=0,S@18.00,11.00	71.43	LOW,LOW,100.00,25=35=0,S@25.00,10.00	89.47	VLOW,VLOW,100.00,17=19=0,S@17.00,2.00	80.00	OK,OK,100.00,36=45=0,S@36.00,9.00	17.98
PUM1	HsaALTA0006869-3/3	chr1:30966147-30966278	81	chr1:30967167,30966147-30966197+30966269+30966278	Alt3	33.52	VLOW,VLOW,100.00,7=21=0,C1@7.04,13.96	43.91	VLOW,VLOW,100.00,7=16=0,C1@7.03,8.97	63.87	VLOW,VLOW,100.00,14=22=0,C1@14.05,7.95	49.74	VLOW,VLOW,100.00,11=22=0,C1@10.94,11.06	18.08
BAG6	HsaALTD0000658-2/2	chr6:31652400-31652445	24	chr6:31652424+31652400-31652445,31651776	Alt5	34.82	LOW,LOW,86.33,11=31=5,S@10.79,20.21	41.40	VLOW,VLOW,95.08,8=19=1,S@7.87,11.13	62.48	VLOW,VLOW,95.05,12=19=1,S@11.87,7.13	50.22	OK,OK,98.17,27=53=1,S@26.62,26.38	18.24
KHDRBS3	HsaEX0033406	chr8:135645059-135645117	59	chr8:135607037,135645059-135645117,135646993	S	72.11	LOW,LOW,17=19=7,OK,C1@31.01,11.99	67.93	VLOW,VLOW,10=11=5,OK,C1@17.66,8.34	87.84	LOW,LOW,13=16=2,OK,C1@27.23,3.77	88.87	OK,OK,40=39=5,OK,S@74.65,9.35	18.34
ADGRB2	HsaEX0007567	chr1:31728025-31728081	57	chr1:31728182,31728025-31728081,31727605	S	47.13	OK,OK,19=22=23,OK,S@30.16,33.84	58.44	OK,OK,24=21=16,OK,S@35.65,25.35	77.27	LOW,LOW,16=18=5,OK,S@30.14,8.86	65.22	OK,OK,36=24=16,OK,S@49.57,26.43	18.47
ZC3H14	HsaEX0072241	chr14:88602828-88603060	233	chr14:88602083,88602828-88603060,88607243	C2	45.50	VLOW,VLOW,13=9=12,OK,C2@15.47,18.53	21.44	LOW,LOW,5=4=15,OK,C3@5.15,18.85	52.38	VLOW,VLOW,20=7=11,B1,C2@19.90,18.10	51.63	OK,OK,23=17=17,OK,C2@29.43,27.57	18.54
PTK2	HsaEX0050855	chr8:140769575-140769592	18	chr8:140789474,140769575-140769592,140764284+140764290	S	34.17	OK,OK,4=3=21,OK,C1@9.57,18.43	52.24	LOW,LOW,5=6=16,OK,S@14.10,12.90	65.39	LOW,OK,12=7=16,OK,S@22.89,12.11	58.20	OK,OK,7=14=24,B1,S@26.19,18.81	18.6
YTHDC1	HsaALTA1007522-3/3	chr4:68318690-68318753	35	chr4:68318826,68318690-68318718+68318729+68318753	Alt3	33.33	VLOW,LOW,100.00,7=21=0,S@7.00,14.00	33.33	VLOW,LOW,100.00,8=24=0,S@8.00,16.00	55.56	VLOW,VLOW,95.62,10=18=1,S@10.00,8.00	48.39	LOW,LOW,100.00,15=31=0,S@15.00,16.00	18.65
NRCAM	HsaEX0043768	chr7:108225645-108225701	57	chr7:108226208,108225645-108225701,108223836	S	83.55	OK,OK,16=25=4,OK,S@37.60,7.40	67.65	OK,OK,15=23=9,OK,S@31.80,15.20	100.00	VLOW,VLOW,10=8=0,OK,S@18.00,0.00	88.57	OK,OK,21=42=4,OK,S@59.34,7.66	18.68
PTPRF	HsaEX0051138	chr1:43602071-43602097	27	chr1:43598913,43602071-43602097+43602108,43603416	S	21.21	VLOW,VLOW,0=4=13,Bn,S@3.61,13.39	41.72	LOW,LOW,4=5=15,OK,S@10.01,13.99	53.27	VLOW,VLOW,2=12=12,B1,S@13.85,12.15	47.12	OK,OK,9=4=20,B1,S@15.55,17.45	18.74
MMP24	HsaEX0039672	chr20:35263791-35263952	162	chr20:35254754,35263791-35263952,35267205	S	69.57	LOW,LOW,14=18=7,OK,S@27.13,11.87	53.49	VLOW,VLOW,14=9=10,OK,S@17.65,15.35	75.61	LOW,LOW,13=18=5,OK,S@27.22,8.78	84.95	OK,OK,43=36=7,OK,S@73.06,12.94	18.75
ASAP2	HsaEX0006176	chr2:9318524-9318598	75	chr2:9297445,9318524-9318598+9318685,9320288	S	76.47	VLOW,VLOW,13=13=4,OK,S@22.94,7.06	71.43	VLOW,VLOW,8=12=4,OK,S@17.14,6.86	100.00	VLOW,VLOW,10=8=0,OK,S@18.00,0.00	85.45	OK,OK,29=18=4,OK,S@43.58,7.42	18.77
NSD3	HsaEX0071501	chr8:38299444-38299590	147	chr8:38304587,38299444-38299590,38295952	C1	68.78	VLOW,VLOW,12=10=5,OK,C1@18.57,8.43	86.56	VLOW,VLOW,18=8=2,B1,C1@24.24,3.76	93.45	LOW,LOW,11=18=1,OK,C2@28.04,1.97	100.00	OK,OK,28=19=0,OK,C1@47.00,0.00	19.05
CCDC66	HsaALTA1049414-4/4	chr3:56593491-56593741	129	chr3:56593101,56593620+56593560+56593536+56593491-56593741	Alt3	73.33	VLOW,VLOW,100.00,11=15=0,S@11.00,4.00	73.91	VLOW,VLOW,100.00,17=23=0,S@17.00,6.00	94.12	VLOW,VLOW,100.00,16=17=0,S@16.00,1.00	91.30	VLOW,VLOW,100.00,21=23=0,S@21.00,2.00	19.09
ASNS	HsaALTA0000719-2/2	chr7:97854580-97854754	74	chr7:97855353,97854580-97854680+97854754	Alt3	9.68	LOW,LOW,100.00,3=31=0,S@3.00,28.00	6.45	LOW,LOW,100.00,2=31=0,S@2.00,29.00	39.29	LOW,LOW,100.00,11=28=0,S@11.00,17.00	15.19	OK,OK,100.00,12=79=0,S@12.00,67.00	19.18
CSPP1	HsaEX0017595	chr8:67115914-67116122	209	chr8:67113862,67115914-67116122+67116156,67118248	C1	66.72	VLOW,VLOW,10=7=4,OK,C2@14.01,6.99	75.87	VLOW,VLOW,12=8=3,OK,C2@17.45,5.55	80.99	VLOW,VLOW,11=7=2,OK,C2@16.20,3.80	100.00	LOW,LOW,13=20=0,OK,C1@33.00,0.00	19.2
UBR3	HsaEX0068975	chr2:169877494-169877637	144	chr2:169875949,169877494-169877637,169878525	S	75.00	LOW,LOW,18=18=6,OK,S@31.50,10.50	69.23	VLOW,VLOW,14=13=6,OK,S@22.85,10.15	89.74	LOW,LOW,17=18=2,OK,S@33.20,3.80	93.33	OK,OK,33=23=2,OK,S@54.13,3.87	19.41
MRPL47	HsaEX0040147	chr3:179602652-179602737	86	chr3:179604225+179604298+179604395+179604527,179602652-179602737+179602797,179601784+179601790	S	78.12	OK,OK,15=35=7,B1,S@44.53,12.47	74.47	VLOW,VLOW,8=27=6,B1,S@30.53,10.47	100.00	VLOW,VLOW,8=17=0,B1,S@25.00,0.00	91.58	LOW,LOW,14=73=4,B2,S@83.34,7.66	19.49
KIAA1598	HsaEX0034190	chr10:116906627-116906747	121	chr10:116911790,116906627-116906747,116901957	C2	48.94	OK,OK,21=24=20,OK,C2@31.81,33.19	47.35	OK,OK,15=21=17,OK,C2@25.10,27.90	65.89	OK,OK,16=25=9,OK,C2@32.95,17.05	69.78	SOK,SOK,88=85=32,OK,C1@143.05,61.95	19.7
UAP1	HsaEX0068590	chr1:162592735-162592782	48	chr1:162590511+162590515,162592732+162592735-162592782,162597792	S	7.69	OK,OK,1=3=24,B1,S@2.15,25.85	7.69	VLOW,VLOW,1=1=12,OK,S@1.08,12.92	33.33	VLOW,VLOW,4=6=10,OK,S@6.67,13.33	21.52	OK,OK,9=8=31,OK,S@10.33,37.67	19.73
DNM1L	HsaEX0020452	chr12:32738264-32738296	33	chr12:32737161,32738264-32738296,32740064	C2	63.24	VLOW,LOW,13=10=9,OK,C2@20.24,11.76	60.61	VLOW,VLOW,10=6=7,OK,C2@13.94,9.06	85.83	VLOW,VLOW,11=7=2,OK,C1@17.17,2.83	77.59	LOW,LOW,26=10=7,B1,C2@33.36,9.64	19.79
CHD2	HsaALTA1046865-2/3	chr15:92978148-92978383	86	chr15:92974950,92978234+92978148+92978011-92978383	Alt3	25.00	VLOW,VLOW,100.00,4=16=0,S@4.00,12.00	22.73	VLOW,VLOW,100.00,5=22=0,S@5.00,17.00	40.00	VLOW,VLOW,100.00,8=20=0,S@8.00,12.00	47.83	VLOW,VLOW,100.00,11=23=0,S@11.00,12.00	20.04
SFXN1	HsaEX0057718	chr5:175522375-175522422	48	chr5:175521968,175522375-175522422,175526638	S	82.54	LOW,LOW,25=12=4,OK,C1@33.84,7.16	72.37	VLOW,LOW,11=14=5,OK,C1@21.71,8.29	100.00	VLOW,VLOW,11=11=0,OK,S@22.00,0.00	95.49	OK,OK,51=32=2,OK,S@81.17,3.83	20.29
HERC2	HsaALTD0003014-1/5	chr15:28218521-28218668	0	chr15:28218521+28218489+28218419+28218415+28218047-28218668,28215802	Alt5	40.56	OK,OK,100.00,24=61=0,C2@24.74,36.26	39.90	LOW,LOW,100.00,13=34=0,C2@13.57,20.43	51.50	LOW,LOW,100.00,16=32=0,C2@16.48,15.52	69.54	OK,OK,100.00,30=44=0,C2@30.60,13.40	20.29
IGF1R	HsaALTA0004212-2/2	chr15:98929558-98929660	3	chr15:98924684,98929561+98929558-98929660	Alt3	42.86	LOW,LOW,100.00,12=28=0,S@12.00,16.00	45.45	VLOW,VLOW,100.00,10=22=0,S@10.00,12.00	60.00	LOW,LOW,100.00,18=30=0,S@18.00,12.00	68.97	LOW,LOW,100.00,20=29=0,S@20.00,9.00	20.32
ZC3H14	HsaALTA0009631-3/4	chr14:88609712-88609803	15	chr14:88609403,88609727+88609715+88609712+88609679-88609803	Alt3	42.42	LOW,LOW,100.00,14=33=0,S@14.00,19.00	42.42	LOW,LOW,100.00,14=33=0,S@14.00,19.00	57.69	LOW,LOW,100.00,15=26=0,S@15.00,11.00	67.92	OK,OK,100.00,36=53=0,S@36.00,17.00	20.38
C12orf10	HsaINT0020005	chr12:53299954-53300149	196	chr12:53299686-53299953=53300150-53300262:+	IR	5.88	OK,OK,3.3=147,2=1=24,0.677@1.59,25.41	4.35	VLOW,VLOW,2.6=147,0=1=11,0.364@0.52,11.48	21.21	VLOW,VLOW,1.2=147,3=4=13,0.558@4.24,15.76	30	VLOW,VLOW,2.9=147,6=6=14,0.762@7.8,18.2	20.49
USP47	HsaEX0069942	chr11:11880177-11880380	204	chr11:11842224,11880177-11880380,11884467	S	58.33	LOW,LOW,17=11=10,OK,S@22.17,15.83	60.98	VLOW,VLOW,16=9=8,OK,S@20.12,12.88	80.65	VLOW,VLOW,16=9=3,OK,S@22.58,5.42	79.71	OK,OK,36=19=7,OK,S@49.42,12.58	20.52
SLC38A1	HsaEX0059517	chr12:46196725-46196871	147	chr12:46197720,46196725-46196871+46196937,46189071+46189129	C3	2.56	LOW,LOW,1=0=19,Bn,C1@0.51,19.49	23.08	VLOW,VLOW,5=1=10,B1,C1@3.69,12.31	37.50	VLOW,VLOW,7=5=10,OK,S@8.25,13.75	29.23	OK,OK,15=4=23,B1,C1@12.28,29.72	20.55
SAT2	HsaEX0056273	chr17:7626943-7627044	102	chr17:7627143,7626943-7627044,7626793	S	66.67	VLOW,VLOW,10=6=4,OK,S@13.33,6.67	51.35	VLOW,VLOW,14=5=9,B1,C1@14.38,13.62	72.41	VLOW,VLOW,16=5=4,B1,S@18.10,6.90	87.23	LOW,LOW,31=10=3,B1,S@38.38,5.62	20.81
HNRNPH1	HsaALTD0003092-2/5	chr5:179623595-179623646	41	chr5:179623636+179623595+179623442+179623360+179623281-179623646,179623164	Alt5	50.17	OK,OK,94.81,35=43=4,S@21.57,21.43	45.77	LOW,OK,89.30,22=28=6,S@12.82,15.18	59.94	VLOW,VLOW,79.02,13=15=6,S@8.99,6.01	77.84	SOK,SOK,92.54,156=167=17,S@129.99,37.01	20.92
HNRNPUL1	HsaALTA0004081-3/6	chr19:41305676-41305854	156	chr19:41304261,41305832+41305681+41305676+41305646+41305628+41305612-41305854	Alt3	63.16	OK,OK,95.00,36=57=3,S@36.00,21.00	75.00	OK,OK,97.78,33=44=1,S@33.00,11.00	96.88	LOW,LOW,96.97,31=32=1,S@31.00,1.00	84.03	SOK,SOK,100.00,100=119=0,S@100.00,19.00	21.37
NCOR1	HsaALTA0005614-2/3	chr17:16126132-16126209	3	chr17:16137311,16126132-16126206+16126209+16126284	Alt3	38.33	VLOW,LOW,100.00,9=23=0,S@8.82,14.18	47.15	LOW,LOW,100.00,12=25=0,S@11.79,13.21	69.88	VLOW,VLOW,100.00,12=17=0,S@11.88,5.12	58.64	LOW,OK,100.00,22=37=0,S@21.70,15.30	21.52
GANAB	HsaEX0026994	chr11:62634310-62634375	66	chr11:62634821,62634310-62634375,62633514+62633567	S	20.00	OK,OK,5=5=20,OK,S@6.00,24.00	23.64	OK,OK,3=10=21,B1,S@8.04,25.96	48.72	VLOW,VLOW,11=8=10,OK,S@14.13,14.87	38.00	OK,OK,18=20=31,OK,S@26.22,42.78	21.54
MAP2K5	HsaEX0037501	chr15:67664597-67664645	49	chr15:67658614,67664597-67664645,67692479	C1	81.93	VLOW,VLOW,6=14=2,B1,C1@18.02,3.98	74.30	VLOW,VLOW,8=11=3,OK,S@16.35,5.65	100.00	LOW,LOW,15=10=0,OK,S@25.00,0.00	100.00	OK,OK,20=15=0,OK,S@35.00,0.00	21.88
MGEA5	HsaEX0039116	chr10:101793913-101793998	86	chr10:101797980,101793913-101793998,101792901+101792943	C3	69.23	LOW,LOW,35=10=10,B1,S@38.08,16.92	70.37	LOW,LOW,46=11=12,B1,C1@48.56,20.44	88.24	OK,OK,27=18=3,OK,C1@42.36,5.64	95.51	SOK,SOK,270=28=7,B2,S@291.31,13.69	22.08
ARID1A	HsaALTA1019413-2/2	chr1:26772812-26772987	3	chr1:26772632,26772815+26772812-26772987	Alt3	57.14	LOW,LOW,100.00,16=28=0,S@16.00,12.00	33.33	VLOW,VLOW,100.00,8=24=0,S@8.00,16.00	62.96	LOW,LOW,100.00,17=27=0,S@17.00,10.00	72.73	OK,OK,100.00,40=55=0,S@40.00,15.00	22.61
SCN3B	HsaINT0145862	chr11:123633777-123634120	344	chr11:123634121-123634206=123629189-123633776:-	IR	14.26	LOW,LOW,3.0=151,4=1=15,0.558@2.92,17.58	19.97	LOW,LOW,3.5=151,8=1=18,0.223@5.54,22.2	36.79	VLOW,VLOW,6.3=151,13=1=12,0.0594@9.84,16.9	42.86	OK,OK,10.4=151,36=0=24,3.92e-06@26.47,35.29	22.72
CCDC186	HsaEX0008780	chr10:114162637-114163329	693	chr10:114174015+114174441,114162637-114163329,114157680	C2	71.58	VLOW,VLOW,9=11=4,OK,C2@17.18,6.82	82.80	VLOW,VLOW,13=6=2,B1,C2@17.39,3.61	100.00	VLOW,VLOW,11=9=0,OK,C2@20.00,0.00	100.00	LOW,LOW,10=15=0,OK,C2@25.00,0.00	22.81
SMARCA4	HsaALTA0008029-3/3	chr19:11058255-11058363	6	chr19:11041560,11058261+11058258+11058255-11058363	Alt3	58.62	LOW,LOW,100.00,17=29=0,S@17.00,12.00	57.14	LOW,LOW,100.00,16=28=0,S@16.00,12.00	78.26	VLOW,LOW,100.00,18=23=0,S@18.00,5.00	84.00	LOW,LOW,100.00,21=25=0,S@21.00,4.00	23.25
RBM26	HsaALTA1030201-2/3	chr13:79365578-79365718	15	chr13:79366055,79365578-79365703+79365718+79365733	Alt3	76.64	VLOW,VLOW,100.00,15=20=0,S@15.33,4.67	66.32	LOW,LOW,100.00,18=28=0,S@18.57,9.43	100.00	VLOW,VLOW,100.00,19=19=0,S@19.00,0.00	91.22	VLOW,VLOW,100.00,19=21=0,S@19.16,1.84	24.13
SLC16A14	HsaEX0058715	chr2:230045745-230046722	978	chr2:230059035+230059094,230045745-230046722,230037531	C2	49.87	VLOW,VLOW,11=8=10,OK,C2@14.46,14.54	72.44	VLOW,VLOW,11=9=4,OK,C2@17.39,6.61	82.58	VLOW,VLOW,21=6=3,B1,C3@24.77,5.23	88.30	OK,OK,33=53=6,OK,C2@81.24,10.76	24.28
CAMSAP2	HsaALTA0001445-2/2	chr1:200847210-200847292	48	chr1:200844869,200847258+200847210-200847292	Alt3	74.63	LOW,LOW,100.00,25=32=0,S@23.88,8.12	66.55	VLOW,LOW,95.88,17=24=1,S@15.97,8.03	90.06	VLOW,LOW,100.00,22=24=0,S@21.61,2.39	100.00	LOW,LOW,100.00,38=38=0,S@38.00,0.00	24.44
DGUOK	HsaEX0019479	chr2:73957125-73957240	116	chr2:73950732,73957125-73957240,73958146	C2	39.91	VLOW,VLOW,11=5=12,B1,C2@11.17,16.83	28.28	VLOW,VLOW,7=4=14,OK,C2@7.07,17.93	53.26	VLOW,VLOW,9=12=9,OK,C1@15.98,14.02	63.86	VLOW,VLOW,14=7=6,B1,C1@17.24,9.76	24.47
XIST	HsaALTA1058191-2/2	chrX:73827801-73827984	56	chrX:73829068,73827801-73827928+73827984	Alt3	62.22	OK,OK,96.12,28=45=2,S@28.00,17.00	61.11	LOW,OK,100.00,22=36=0,S@22.00,14.00	94.44	VLOW,VLOW,100.00,17=18=0,S@17.00,1.00	78.57	OK,OK,100.00,33=42=0,S@33.00,9.00	24.84
NR2C2	HsaEX0043703	chr3:14959536-14959641	106	chr3:14947906,14959536-14959641+14959738,15003876	C2	8.95	VLOW,VLOW,0=2=10,Bn,C2@1.07,10.93	8.33	VLOW,VLOW,0=2=11,Bn,C1@1.08,11.92	33.62	VLOW,VLOW,5=5=10,OK,C3@6.72,13.28	33.47	VLOW,VLOW,2=8=10,B1,C3@6.69,13.31	24.91
VAMP2	HsaALTD1054275-2/2	chr17:8162444-8162932	434	chr17:8162878+8162444-8162932,8162369	Alt5	17.95	LOW,LOW,100.00,7=39=0,S@7.00,32.00	40.00	LOW,LOW,100.00,10=25=0,S@10.00,15.00	62.86	LOW,LOW,100.00,22=35=0,S@22.00,13.00	46.51	OK,OK,100.00,40=86=0,S@40.00,46.00	25.71
RFWD2	HsaALTD0005370-1/2	chr1:176163827-176163891	0	chr1:176163827+176163815-176163891,176162988	Alt5	14.22	VLOW,VLOW,95.35,3=18=1,S@2.56,15.44	15.08	VLOW,VLOW,95.21,3=17=1,S@2.56,14.44	53.47	VLOW,VLOW,100.00,11=19=0,C1@10.16,8.84	28.19	LOW,LOW,100.00,9=28=0,S@7.89,20.11	26.18
WDR33	HsaINT0182017	chr2:127763160-127764827	1668	chr2:127764828-127764979=127763062-127763159:-	IR	29.59	OK,OK,4.6=151,7=14=26,0.472@14.16,33.69	50.75	VLOW,VLOW,4.4=151,11=13=12,0.382@18.68,18.13	73.58	VLOW,VLOW,4.2=151,13=14=5,0.33@24.17,8.68	62.24	OK,OK,5.8=151,26=19=14,0.15@37.44,22.71	27.74

## Sheet: majiq
	gene_name	gene_id	lsv_id	mean_dpsi_per_lsv_junction	probability_changing	probability_non_changing	c1_mean_psi	c2_mean_psi	lsv_type	num_junctions	num_exons	de_novo_junctions	seqid	strand	junctions_coords	exons_coords	ir_coords
1	KIAA0586	ENSG00000100578.18	ENSG00000100578.18:s:58427684-58427857	-0.0004;-0.0004;0.0011	3.697e-04;3.697e-04;1.495e-03	7.912e-01;7.912e-01;5.859e-01	0.0238;0.0238;0.9524	0.0191;0.0191;0.9619	s|1e1.1o1|2e1.1o1|i	3	2	0;0;0	chr14	+	58427813-58429363;58427857-58429363;58427858-58427989	58427684-58427857;58429363-58429433	58427858-58427989
2	KIAA0586	ENSG00000100578.18	ENSG00000100578.18:t:58427990-58428463	-0.0004;-0.0004;0.0011	3.697e-04;3.697e-04;1.495e-03	7.912e-01;7.912e-01;5.859e-01	0.0238;0.0238;0.9524	0.0191;0.0191;0.9619	t|1e1.1o1|2e1.1o1|i	3	2	0;0;0	chr14	+	58427637-58428238;58427637-58428272;58427858-58427989	58427385-58427637;58427990-58428463	58427858-58427989
3	NELFCD	ENSG00000101158.15	ENSG00000101158.15:s:58993624-58993764	-0.0000;-0.0000;0.0000	8.825e-04;8.825e-04;3.500e-03	7.015e-01;7.015e-01;4.675e-01	0.0303;0.0303;0.9394	0.0333;0.0333;0.9333	s|1e1.1o1|2e1.1o1|i	3	2	0;0;0	chr20	+	58993675-58994110;58993764-58994110;58993765-58993922	58993624-58993764;58993923-58994239	58993765-58993922
4	NELFCD	ENSG00000101158.15	ENSG00000101158.15:s:58994642-58994824	-0.0001;0.0001	4.062e-08;4.065e-08	9.829e-01;9.829e-01	0.0094;0.9906	0.0077;0.9923	s|1e1.1o1|i	2	2	0;0	chr20	+	58994824-58994926;58994825-58994925	58994642-58994824;58994926-58995133	58994825-58994925
5	PSMA7	ENSG00000101182.15	ENSG00000101182.15:s:62139696-62139905	-0.0003;-0.0003;0.0009	2.324e-04;2.324e-04;9.224e-04	8.083e-01;8.083e-01;6.173e-01	0.0238;0.0238;0.9524	0.0196;0.0196;0.9608	s|1e1.1o1|2e1.1o1|i	3	2	0;0;0	chr20	-	62139197-62139781;62139197-62139696;62139397-62139695	62139075-62139197;62139696-62139905	62139397-62139695
6	PSMA7	ENSG00000101182.15	ENSG00000101182.15:t:62139075-62139197	0.0000;0.0000;-0.0000	2.779e-04;2.779e-04;1.097e-03	7.939e-01;7.939e-01;5.961e-01	0.0215;0.0215;0.9569	0.0256;0.0256;0.9487	t|1e1.1o2|1e1.2o2|i	3	2	0;0;0	chr20	-	62139197-62139781;62139197-62139696;62139198-62139330	62139075-62139197;62139696-62139905	62139198-62139330
7	ARFGAP1	ENSG00000101199.13	ENSG00000101199.13:s:63288310-63289496	0.0002;-0.0002	1.504e-04;1.504e-04	7.884e-01;7.884e-01	0.0238;0.9762	0.0294;0.9706	s|1e1.1o1|i	2	2	0;0	chr20	+	63289496-63289678;63289497-63289677	63288310-63289496;63289678-63289790	63289497-63289677
8	ARFGAP1	ENSG00000101199.13	ENSG00000101199.13:t:63284866-63284922	-0.0003;-0.0003;-0.0003;0.0012	6.108e-04;6.108e-04;6.108e-04;5.176e-03	7.678e-01;7.678e-01;7.678e-01;4.111e-01	0.0264;0.0264;0.0264;0.9208	0.0227;0.0227;0.0227;0.9318	t|1e1.1o1|1e2.1o1|1e3.1o1|i	4	4	0;0;0;0	chr20	+	63282851-63284866;63283880-63284866;63284512-63284866;63284513-63284865	63282819-63283528;63283851-63283880;63284115-63284512;63284866-63284922	63284513-63284865
9	TUBB4A	ENSG00000104833.12	ENSG00000104833.12:s:6501615-6501787	-0.0002;0.0002	1.706e-07;1.706e-07	9.806e-01;9.806e-01	0.0105;0.9895	0.0049;0.9951	s|1e1.1o1|i	2	2	0;0	chr19	-	6496174-6501615;6501581-6501614	6496131-6496174;6501615-6501787	6501581-6501614
10	TUBB4A	ENSG00000104833.12	ENSG00000104833.12:t:6494319-6496027	-0.0000;0.0000	1.743e-11;4.255e-11	9.979e-01;9.979e-01	0.0061;0.9939	0.0034;0.9966	t|1e1.1o2|i	2	2	0;0	chr19	-	6496027-6501522;6496028-6496060	6494319-6496027;6501515-6501580	6496028-6496060
11	TUBB4A	ENSG00000104833.12	ENSG00000104833.12:t:6496061-6496129	-0.0000;0.0000	2.250e-21;8.417e-13	9.991e-01;9.991e-01	0.0048;0.9952	0.0039;0.9961	t|1e1.1o2|i	2	2	0;0	chr19	-	6496129-6501522;6496130-6496130	6496061-6496129;6501515-6501580	6496130-6496130
12	TUBB4A	ENSG00000104833.12	ENSG00000104833.12:t:6496131-6496174	-0.0000;0.0000	2.247e-21;3.236e-21	1.000e+00;1.000e+00	0.0031;0.9969	0.0021;0.9979	t|1e1.1o1|i	2	2	0;0	chr19	-	6496174-6501615;6496175-6496175	6496131-6496174;6501615-6501787	6496175-6496175
13	TUBB4A	ENSG00000104833.12	ENSG00000104833.12:t:6501515-6501580	-0.0001;-0.0001;0.0004	7.496e-08;7.496e-08;3.381e-07	9.895e-01;9.895e-01;9.689e-01	0.0070;0.0070;0.9860	0.0033;0.0033;0.9934	t|1e1.1o2|1e1.2o2|i	3	2	0;0;0	chr19	-	6501580-6502189;6501580-6502156;6501581-6501614	6501515-6501580;6502156-6502338	6501581-6501614
14	RNF167	ENSG00000108523.16	ENSG00000108523.16:s:4940381-4940642	-0.0003;0.0003	9.514e-07;9.514e-07	9.590e-01;9.590e-01	0.0135;0.9865	0.0079;0.9921	s|1e1.1o2|i	2	2	0;0	chr17	+	4940642-4940873;4940643-4940657	4940381-4940642;4940873-4940993	4940643-4940657
15	RNF167	ENSG00000108523.16	ENSG00000108523.16:t:4940873-4940993	-0.0001;-0.0001;-0.0001;-0.0001;-0.0001;0.0010	2.835e-06;2.835e-06;2.835e-06;2.835e-06;2.835e-06;6.082e-05	9.762e-01;9.762e-01;9.762e-01;9.762e-01;9.762e-01;8.115e-01	0.0061;0.0061;0.0061;0.0061;0.0061;0.9697	0.0041;0.0041;0.0041;0.0041;0.0041;0.9797	t|1e1.1o1|1e2.1o1|1e3.1o1|1e4.1o1|2e4.1o1|i	6	5	0;0;0;0;0;0	chr17	+	4940230-4940873;4940360-4940873;4940642-4940873;4940726-4940873;4940726-4940923;4940837-4940872	4940008-4940230;4940268-4940360;4940381-4940642;4940658-4940836;4940873-4940993	4940837-4940872
16	SMC4	ENSG00000113810.16	ENSG00000113810.16:s:160399638-160399749	-0.0000;-0.0000;-0.0000;-0.0000;-0.0000;-0.0000;-0.0000;-0.0000;0.0002	8.634e-05;8.634e-05;8.634e-05;8.634e-05;8.634e-05;8.634e-05;8.634e-05;8.634e-05;3.346e-03	9.269e-01;9.269e-01;9.269e-01;9.269e-01;9.269e-01;9.269e-01;9.269e-01;9.269e-01;4.530e-01	0.0080;0.0080;0.0080;0.0080;0.0080;0.0080;0.0080;0.0080;0.9362	0.0079;0.0079;0.0079;0.0079;0.0079;0.0079;0.0079;0.0079;0.9365	s|1e1.3o3|1e3.1o1|1e4.1o1|2e1.1o3|2e1.2o3|2e1.3o3|2e2.1o1|2e4.1o1|i	9	5	0;0;0;0;0;0;0;0;0	chr3	+	160399697-160400822;160399697-160401990;160399697-160402676;160399749-160400600;160399749-160400628;160399749-160400822;160399749-160401915;160399749-160402676;160399750-160400481	160399638-160399749;160400482-160400965;160401915-160401923;160401990-160402093;160402676-160402867	160399750-160400481
17	SMC4	ENSG00000113810.16	ENSG00000113810.16:s:160401915-160401923	-0.0001;0.0001	1.392e-06;1.392e-06	9.456e-01;9.456e-01	0.0130;0.9870	0.0117;0.9883	s|1e1.1o1|i	2	2	0;0	chr3	+	160401923-160411920;160401924-160401989	160401915-160401923;160411758-160411977	160401924-160401989
18	SMC4	ENSG00000113810.16	ENSG00000113810.16:s:160411758-160411977	-0.0001;0.0001	2.150e-08;2.153e-08	9.871e-01;9.871e-01	0.0087;0.9913	0.0064;0.9936	s|1e1.1o1|i	2	2	0;0	chr3	+	160411977-160412326;160411978-160412021	160411758-160411977;160412326-160412453	160411978-160412021
19	SMC4	ENSG00000113810.16	ENSG00000113810.16:t:160401990-160402093	-0.0001;-0.0001;0.0002	6.200e-07;6.200e-07;2.721e-06	9.692e-01;9.692e-01;9.169e-01	0.0087;0.0087;0.9827	0.0078;0.0078;0.9844	t|1e1.1o2|1e2.1o1|i	3	3	0;0;0	chr3	+	160399697-160401990;160400965-160401990;160401924-160401989	160399638-160399749;160400482-160400965;160401990-160402093	160401924-160401989
20	IP6K2	ENSG00000068745.15	ENSG00000068745.15:s:48694624-48694824	0.0001;0.0001;-0.0002	3.524e-05;3.524e-05;1.423e-04	8.973e-01;8.973e-01;7.671e-01	0.0136;0.0136;0.9728	0.0152;0.0152;0.9697	s|1e1.1o1|2e1.1o1|i	3	2	0;0;0	chr3	-	48694240-48694702;48694240-48694694;48694526-48694623	48693448-48694240;48694624-48694824	48694526-48694623
21	IP6K2	ENSG00000068745.15	ENSG00000068745.15:t:48694345-48694525	0.0001;-0.0001	7.593e-05;7.593e-05	8.336e-01;8.336e-01	0.0204;0.9796	0.0227;0.9773	t|1e1.1o1|i	2	2	0;0	chr3	-	48694525-48695090;48694526-48694623	48694345-48694525;48694872-48695421	48694526-48694623
22	PRKACA	ENSG00000072062.15	ENSG00000072062.15:t:14091688-14092843	-0.0002;0.0002	1.192e-07;1.192e-07	9.806e-01;9.806e-01	0.0104;0.9896	0.0059;0.9941	t|1e1.1o1|i	2	2	0;0	chr19	-	14092843-14107348;14092844-14093042	14091688-14092843;14107348-14107409	14092844-14093042
23	MARK3	ENSG00000075413.19	ENSG00000075413.19:s:103385377-103385697	-0.0001;-0.0001;0.0002	4.512e-08;4.512e-08;2.090e-07	9.866e-01;9.866e-01;9.605e-01	0.0071;0.0071;0.9858	0.0053;0.0053;0.9893	s|1e1.1o1|1e2.1o1|i	3	3	0;0;0	chr14	+	103385697-103386041;103385697-103405076;103385698-103385859	103385377-103385697;103385860-103386080;103405076-103405267	103385698-103385859
24	MARK3	ENSG00000075413.19	ENSG00000075413.19:t:103491539-103492034	-0.0000;-0.0000;-0.0000;-0.0000;-0.0000;-0.0001	2.244e-04;2.244e-04;2.244e-04;2.244e-04;2.244e-04;4.313e-03	8.602e-01;8.602e-01;8.602e-01;8.602e-01;8.602e-01;4.159e-01	0.0152;0.0152;0.0152;0.0152;0.0152;0.9242	0.0152;0.0152;0.0152;0.0152;0.0152;0.9242	t|1e1.1o1|1e2.1o1|1e3.1o1|1e4.1o1|1e5.1o1|i	6	6	0;0;0;0;0;0	chr14	+	103428440-103491777;103451983-103491777;103480490-103491777;103487707-103491777;103491107-103491777;103491108-103491538	103428387-103428440;103451918-103451995;103480387-103481655;103487181-103487707;103489053-103491107;103491539-103492034	103491108-103491538
25	SNRPA	ENSG00000077312.9	ENSG00000077312.9:s:40750867-40750977	-0.0003;-0.0003;0.0007	1.549e-04;1.549e-04;6.141e-04	8.284e-01;8.284e-01;6.495e-01	0.0222;0.0222;0.9556	0.0185;0.0185;0.9630	s|1e1.1o1|2e1.1o1|i	3	2	0;0;0	chr19	+	40750937-40751387;40750977-40751387;40750978-40751202	40750867-40750977;40751203-40751481	40750978-40751202
26	XPO1	ENSG00000082898.19	ENSG00000082898.19:s:61493638-61494091	-0.0001;-0.0001;0.0004	1.359e-04;1.359e-04;5.390e-04	8.354e-01;8.354e-01;6.607e-01	0.0202;0.0202;0.9596	0.0191;0.0191;0.9619	s|1e1.1o1|1e2.1o1|i	3	3	0;0;0	chr2	-	61493053-61493894;61481281-61493894;61493388-61493637	61481185-61481281;61492915-61493387;61493638-61494091	61493388-61493637
27	XPO1	ENSG00000082898.19	ENSG00000082898.19:s:61526067-61526453	-0.0001;-0.0001;0.0003	5.884e-07;5.884e-07;2.574e-06	9.711e-01;9.711e-01;9.213e-01	0.0089;0.0089;0.9822	0.0075;0.0075;0.9850	s|1e1.1o1|1e2.1o1|i	3	3	0;0;0	chr2	-	61525333-61526420;61522683-61526420;61525776-61526066	61522611-61523690;61525270-61525333;61526067-61526453	61525776-61526066
28	XPO1	ENSG00000082898.19	ENSG00000082898.19:s:61536202-61536588	-0.0001;0.0001	1.878e-05;1.878e-05	8.828e-01;8.828e-01	0.0170;0.9830	0.0182;0.9818	s|1e1.1o1|i	2	2	0;0	chr2	-	61533903-61536202;61535871-61536201	61533772-61534246;61536202-61536588	61535871-61536201
29	XPO1	ENSG00000082898.19	ENSG00000082898.19:s:61536870-61537117	-0.0002;-0.0002;0.0005	2.570e-05;2.570e-05;1.046e-04	9.036e-01;9.036e-01;7.792e-01	0.0159;0.0159;0.9683	0.0121;0.0121;0.9757	s|1e1.1o1|2e1.1o1|i	3	2	0;0;0	chr2	-	61533903-61537019;61533903-61536870;61536791-61536869	61533772-61534246;61536870-61537117	61536791-61536869
30	XPO1	ENSG00000082898.19	ENSG00000082898.19:s:61538070-61538356	-0.0000;-0.0000;-0.0000;-0.0000;-0.0000;0.0002	6.932e-11;6.932e-11;6.932e-11;6.932e-11;6.932e-11;2.988e-09	9.990e-01;9.990e-01;9.990e-01;9.990e-01;9.990e-01;9.863e-01	0.0024;0.0024;0.0024;0.0024;0.0024;0.9879	0.0014;0.0014;0.0014;0.0014;0.0014;0.9932	s|1e3.2o2|2e1.2o3|2e1.3o3|2e2.1o1|3e1.1o3|i	6	4	0;0;0;0;0;0	chr2	-	61526505-61538192;61537668-61538138;61537587-61538138;61534518-61538138;61537743-61538070;61537781-61538069	61526462-61526523;61534423-61534518;61537562-61537780;61538070-61538356	61537781-61538069
31	XPO1	ENSG00000082898.19	ENSG00000082898.19:t:61492915-61493387	-0.0001;-0.0001;0.0004	1.359e-04;1.359e-04;5.390e-04	8.354e-01;8.354e-01;6.607e-01	0.0202;0.0202;0.9596	0.0191;0.0191;0.9619	t|1e1.1o1|1e2.1o1|i	3	3	0;0;0	chr2	-	61493053-61496879;61493053-61493894;61493388-61493637	61492915-61493387;61493638-61494091;61496879-61497007	61493388-61493637
32	XPO1	ENSG00000082898.19	ENSG00000082898.19:t:61525270-61525333	0.0000;0.0000;-0.0001	6.300e-05;6.300e-05;2.526e-04	8.716e-01;8.716e-01;7.213e-01	0.0167;0.0167;0.9667	0.0180;0.0180;0.9639	t|1e1.1o1|1e2.1o1|i	3	3	0;0;0	chr2	-	61525333-61526420;61525333-61525492;61525334-61525491	61525270-61525333;61525492-61525775;61526067-61526453	61525334-61525491
33	XPO1	ENSG00000082898.19	ENSG00000082898.19:t:61533772-61534246	0.0000;0.0000;0.0000;0.0000;0.0000;0.0000;0.0000;0.0000;-0.0003	3.217e-05;3.217e-05;3.217e-05;3.217e-05;3.217e-05;3.217e-05;3.217e-05;3.217e-05;1.257e-03	9.467e-01;9.467e-01;9.467e-01;9.467e-01;9.467e-01;9.467e-01;9.467e-01;9.467e-01;5.447e-01	0.0062;0.0062;0.0062;0.0062;0.0062;0.0062;0.0062;0.0062;0.9506	0.0077;0.0077;0.0077;0.0077;0.0077;0.0077;0.0077;0.0077;0.9386	t|1e1.1o1|1e2.1o1|1e3.1o2|1e3.2o2|1e4.1o1|1e5.1o1|1e6.1o1|1e7.1o1|i	9	8	0;0;0;0;0;0;0;0;0	chr2	-	61533903-61538492;61533903-61537562;61533903-61537019;61533903-61536870;61533903-61536710;61533903-61536202;61533903-61534558;61533903-61534423;61534247-61534422	61533772-61534246;61534423-61534518;61534558-61535870;61536202-61536588;61536710-61536790;61536870-61537117;61537562-61537780;61538492-61538741	61534247-61534422
34	XPO1	ENSG00000082898.19	ENSG00000082898.19:t:61534558-61535870	-0.0001;-0.0001;0.0001	8.591e-06;8.591e-06;3.574e-05	9.299e-01;9.299e-01;8.309e-01	0.0113;0.0113;0.9774	0.0121;0.0121;0.9757	t|1e1.1o1|2e1.1o1|i	3	2	0;0;0	chr2	-	61534678-61537562;61534654-61537562;61535871-61536201	61534558-61535870;61537562-61537780	61535871-61536201
35	XPO1	ENSG00000082898.19	ENSG00000082898.19:t:61537562-61537780	-0.0000;-0.0000;-0.0000;-0.0000;-0.0000;0.0002	6.932e-11;6.932e-11;6.932e-11;6.932e-11;6.932e-11;2.988e-09	9.990e-01;9.990e-01;9.990e-01;9.990e-01;9.990e-01;9.863e-01	0.0024;0.0024;0.0024;0.0024;0.0024;0.9879	0.0014;0.0014;0.0014;0.0014;0.0014;0.9932	t|1e2.3o3|2e1.1o1|2e2.2o3|3e1.1o1|3e2.2o3|i	6	3	0;0;0;0;0;0	chr2	-	61537743-61538070;61537668-61538492;61537668-61538138;61537587-61538492;61537587-61538138;61537781-61538069	61537562-61537780;61538070-61538356;61538492-61538741	61537781-61538069
36	MAP2	ENSG00000078018.21	ENSG00000078018.21:s:209579315-209579438	-0.0003;0.0003	1.730e-05;1.730e-05	8.904e-01;8.904e-01	0.0179;0.9821	0.0158;0.9842	s|1e1.1o1|i	2	2	0;0	chr2	+	209579438-209580036;209579439-209579608	209579315-209579438;209580036-209580100	209579439-209579608
37	GNAO1	ENSG00000087258.16	ENSG00000087258.16:t:56356103-56357444	-0.0001;-0.0001;-0.0001;-0.0001;0.0007	1.376e-05;1.376e-05;1.376e-05;1.376e-05;1.962e-04	9.434e-01;9.434e-01;9.434e-01;9.434e-01;7.150e-01	0.0098;0.0098;0.0098;0.0098;0.9610	0.0082;0.0082;0.0082;0.0082;0.9673	t|1e1.1o1|1e2.1o2|1e2.2o2|1e3.1o1|i	5	4	0;0;0;0;0	chr16	+	56351537-56356103;56354987-56356103;56355081-56356103;56355328-56356103;56355440-56356102	56351384-56351537;56354866-56355182;56355256-56355439;56356103-56357444	56355440-56356102
38	METTL2A	ENSG00000087995.16	ENSG00000087995.16:s:62423875-62424012	-0.0003;-0.0003;0.0007	3.306e-05;3.306e-05;1.335e-04	9.037e-01;9.037e-01;7.788e-01	0.0159;0.0159;0.9683	0.0119;0.0119;0.9762	s|1e1.1o1|1e2.1o1|i	3	3	0;0;0	chr17	+	62424012-62424219;62424012-62426299;62424013-62424218	62423875-62424012;62424219-62424310;62426299-62426654	62424013-62424218
39	RNF31	ENSG00000092098.17	ENSG00000092098.17:s:24147453-24147591	-0.0004;0.0004	1.984e-04;1.984e-04	7.762e-01;7.762e-01	0.0278;0.9722	0.0238;0.9762	s|1e1.1o1|i	2	2	0;0	chr14	+	24147591-24147976;24147592-24147697	24147453-24147591;24147976-24148061	24147592-24147697
40	RNF31	ENSG00000092098.17	ENSG00000092098.17:t:24147698-24147890	-0.0002;-0.0002;0.0006	9.265e-05;9.265e-05;3.691e-04	8.573e-01;8.573e-01;6.965e-01	0.0185;0.0185;0.9630	0.0159;0.0159;0.9683	t|1e1.1o1|2e1.1o1|i	3	2	0;0;0	chr14	+	24146817-24147698;24146817-24147832;24147592-24147697	24146740-24146817;24147698-24147890	24147592-24147697
41	RNF31	ENSG00000092098.17	ENSG00000092098.17:t:24149477-24149583	-0.0004;0.0004	7.272e-05;7.272e-05	8.402e-01;8.402e-01	0.0227;0.9773	0.0178;0.9822	t|1e1.1o1|i	2	2	0;0	chr14	+	24148876-24149477;24149432-24149476	24148801-24149150;24149477-24149583	24149432-24149476
42	PNN	ENSG00000100941.9	ENSG00000100941.9:s:39180503-39180701	-0.0000;0.0000	1.572e-10;1.490e-10	9.973e-01;9.973e-01	0.0061;0.9939	0.0042;0.9958	s|1e1.1o1|i	2	2	0;0	chr14	+	39180676-39182309;39180702-39182308	39180503-39180701;39182309-39183220	39180702-39182308
43	POFUT1	ENSG00000101346.14	ENSG00000101346.14:s:32234914-32235122	-0.0005;0.0005	1.281e-04;1.281e-04	8.253e-01;8.253e-01	0.0250;0.9750	0.0179;0.9821	s|1e1.1o1|i	2	2	0;0	chr20	+	32235122-32236433;32235123-32236432	32234914-32235122;32236433-32238658	32235123-32236432
44	INTS6	ENSG00000102786.15	ENSG00000102786.15:t:51452415-51452791	-0.0003;-0.0003;-0.0003;0.0011	9.323e-06;9.323e-06;9.323e-06;8.168e-05	9.564e-01;9.564e-01;9.564e-01;8.197e-01	0.0096;0.0096;0.0096;0.9712	0.0061;0.0061;0.0061;0.9817	t|1e1.1o1|1e2.1o1|1e3.1o1|i	4	4	0;0;0;0	chr13	-	51452500-51454061;51452500-51453523;51452500-51452993;51452792-51452992	51452415-51452791;51452993-51453207;51453523-51453592;51454061-51454264	51452792-51452992
45	NUP93	ENSG00000102900.13	ENSG00000102900.13:s:56748234-56748266	-0.0002;0.0002	3.196e-07;3.198e-07	9.679e-01;9.679e-01	0.0123;0.9877	0.0080;0.9920	s|1e1.1o1|i	2	2	0;0	chr16	+	56748266-56821580;56748267-56748348	56748234-56748266;56821580-56821593	56748267-56748348
46	NFAT5	ENSG00000102908.22	ENSG00000102908.22:t:69694086-69694239	-0.0003;0.0003	1.363e-06;1.363e-06	9.563e-01;9.563e-01	0.0135;0.9865	0.0089;0.9911	t|1e1.1o2|i	2	2	0;0	chr16	+	69647167-69694086;69692054-69694085	69647028-69647586;69694086-69694239	69692054-69694085
47	GDAP1	ENSG00000104381.14	ENSG00000104381.14:s:74351252-74351321	0.0000;0.0000;0.0000;0.0000;0.0000;0.0000;-0.0005	1.460e-06;1.460e-06;1.460e-06;1.460e-06;1.460e-06;1.460e-06;4.264e-05	9.805e-01;9.805e-01;9.805e-01;9.805e-01;9.805e-01;9.805e-01;8.080e-01	0.0040;0.0040;0.0040;0.0040;0.0040;0.0040;0.9762	0.0051;0.0051;0.0051;0.0051;0.0051;0.0051;0.9694	s|1e1.1o1|1e2.1o2|1e2.2o2|1e3.1o1|1e4.1o1|1e5.1o1|i	7	6	0;0;0;0;0;0;0	chr8	+	74351321-74351454;74351321-74360137;74351321-74360141;74351321-74361884;74351321-74362939;74351321-74488678;74351322-74351339	74351252-74351321;74351454-74351638;74360137-74360310;74361884-74361978;74362841-74363053;74488678-74488879	74351322-74351339
48	GDAP1	ENSG00000104381.14	ENSG00000104381.14:s:74351340-74351418	-0.0000;0.0000	3.358e-06;3.358e-06	9.309e-01;9.309e-01	0.0138;0.9862	0.0135;0.9865	s|1e1.1o2|i	2	2	0;0	chr8	+	74351418-74360137;74351419-74351453	74351340-74351418;74360137-74360310	74351419-74351453
49	GDAP1	ENSG00000104381.14	ENSG00000104381.14:s:74361884-74361978	-0.0002;-0.0002;0.0004	9.656e-05;9.656e-05;3.847e-04	8.586e-01;8.586e-01;6.984e-01	0.0175;0.0175;0.9649	0.0167;0.0167;0.9667	s|1e1.1o1|1e2.1o1|i	3	3	0;0;0	chr8	+	74361978-74362264;74361978-74362939;74361979-74362263	74361884-74361978;74362264-74362780;74362841-74363053	74361979-74362263
50	GDAP1	ENSG00000104381.14	ENSG00000104381.14:t:74351454-74351638	-0.0000;0.0000	3.358e-06;3.358e-06	9.309e-01;9.309e-01	0.0138;0.9862	0.0135;0.9865	t|1e1.1o1|i	2	2	0;0	chr8	+	74351321-74351454;74351419-74351453	74351252-74351321;74351454-74351638	74351419-74351453
51	PTPRZ1	ENSG00000106278.12	ENSG00000106278.12:s:122010334-122011309	-0.0000;-0.0000;-0.0000;-0.0000;0.0000	2.247e-21;2.247e-21;2.247e-21;2.247e-21;2.043e-21	1.000e+00;1.000e+00;1.000e+00;1.000e+00;9.999e-01	0.0011;0.0011;0.0011;0.0011;0.9955	0.0007;0.0007;0.0007;0.0007;0.9972	s|1e1.1o2|1e1.2o2|1e2.1o1|1e3.1o1|i	5	4	0;0;0;0;0	chr7	+	122011309-122012078;122011309-122012648;122011309-122012822;122011309-122019124;122011310-122012077	122010334-122011309;122012078-122012821;122012822-122013312;122019124-122019268	122011310-122012077
52	PTPRZ1	ENSG00000106278.12	ENSG00000106278.12:s:122012078-122012821	0.0000;-0.0000	2.249e-21;2.430e-12	9.992e-01;9.992e-01	0.0040;0.9960	0.0041;0.9959	s|1e1.1o1|i	2	2	0;0	chr7	+	122012821-122019124;122012822-122012821	122012078-122012821;122012822-122013312;122019124-122019268	122012822-122012821
53	PTPRZ1	ENSG00000106278.12	ENSG00000106278.12:t:122012822-122013312	0.0000;-0.0000	2.249e-21;2.430e-12	9.992e-01;9.992e-01	0.0040;0.9960	0.0041;0.9959	t|1e1.1o1|i	2	2	0;0	chr7	+	122011309-122012822;122012822-122012821	122010334-122011309;122012078-122012821;122012822-122013312	122012822-122012821
54	HNRNPC	ENSG00000092199.19	ENSG00000092199.19:s:21213069-21213419	-0.0000;0.0000	2.247e-21;1.110e-16	9.999e-01;9.999e-01	0.0033;0.9967	0.0015;0.9985	s|1e1.2o2|i	2	2	0;0	chr14	-	21211903-21213069;21213045-21213068	21211810-21212002;21213069-21213419	21213045-21213068
55	HNRNPC	ENSG00000092199.19	ENSG00000092199.19:s:21262993-21263582	0.0000;0.0000;0.0000;0.0000;0.0000;0.0000;-0.0002	2.262e-06;2.262e-06;2.262e-06;2.262e-06;2.262e-06;2.262e-06;6.526e-05	9.753e-01;9.753e-01;9.753e-01;9.753e-01;9.753e-01;9.753e-01;7.737e-01	0.0048;0.0048;0.0048;0.0048;0.0048;0.0048;0.9709	0.0054;0.0054;0.0054;0.0054;0.0054;0.0054;0.9673	s|1e1.1o2|1e1.2o2|1e2.1o1|1e3.1o1|1e4.1o1|1e5.1o1|i	7	6	0;0;0;0;0;0;0	chr14	-	21262768-21263311;21262698-21263311;21254593-21263311;21236460-21263311;21234831-21263311;21234229-21263311;21262769-21262992	21233953-21234229;21234769-21234831;21236373-21236460;21254547-21254593;21262601-21262768;21262993-21263582	21262769-21262992
56	HNRNPC	ENSG00000092199.19	ENSG00000092199.19:t:21209136-21211306	0.0004;0.0004;-0.0011	4.765e-04;4.765e-04;1.903e-03	7.599e-01;7.599e-01;5.442e-01	0.0222;0.0222;0.9556	0.0318;0.0318;0.9364	t|1e1.1o1|1e2.1o1|i	3	3	0;0;0	chr14	-	21211306-21211810;21211306-21211406;21211307-21211405	21209136-21211306;21211406-21211566;21211810-21212002	21211307-21211405
57	HNRNPC	ENSG00000092199.19	ENSG00000092199.19:t:21212960-21213044	-0.0000;0.0000	2.247e-21;1.110e-16	9.999e-01;9.999e-01	0.0033;0.9967	0.0015;0.9985	t|1e1.2o2|i	2	2	0;0	chr14	-	21213044-21230958;21213045-21213068	21212960-21213044;21230898-21231072	21213045-21213068
58	HNRNPC	ENSG00000092199.19	ENSG00000092199.19:t:21262993-21263582	-0.0001;-0.0001;-0.0001;-0.0001;0.0006	7.244e-07;7.244e-07;7.244e-07;7.244e-07;1.142e-05	9.803e-01;9.803e-01;9.803e-01;9.803e-01;8.703e-01	0.0059;0.0059;0.0059;0.0059;0.9765	0.0046;0.0046;0.0046;0.0046;0.9814	t|1e1.1o1|2e1.1o1|2e2.1o1|2e3.1o1|i	5	4	0;0;0;0;0	chr14	-	21263582-21269298;21263336-21269298;21263336-21268623;21263336-21263667;21263583-21263666	21262993-21263582;21263667-21265516;21268623-21268668;21269298-21269494	21263583-21263666
59	ARCN1	ENSG00000095139.15	ENSG00000095139.15:t:118601636-118603033	-0.0002;0.0002	3.561e-07;3.561e-07	9.727e-01;9.727e-01	0.0112;0.9888	0.0071;0.9929	t|1e1.1o2|i	2	2	0;0	chr11	+	118581401-118601636;118600994-118601635	118581246-118581509;118601636-118603033	118600994-118601635
60	MICALL1	ENSG00000100139.14	ENSG00000100139.14:s:37940709-37941533	-0.0004;0.0004	3.598e-05;3.599e-05	8.648e-01;8.648e-01	0.0217;0.9783	0.0172;0.9828	s|1e1.1o1|i	2	2	0;0	chr22	+	37941533-37941670;37941534-37941669	37940709-37941533;37941670-37942822	37941534-37941669
61	FBXW7	ENSG00000109670.16	ENSG00000109670.16:s:152535127-152536092	0.0001;0.0001;0.0001;-0.0004	9.897e-05;9.897e-05;9.897e-05;8.284e-04	8.747e-01;8.747e-01;8.747e-01;6.093e-01	0.0135;0.0135;0.0135;0.9594	0.0167;0.0167;0.0167;0.9500	s|1e1.1o1|1e2.1o1|1e3.1o1|i	4	4	0;0;0;0	chr4	-	152535033-152535127;152412529-152535127;152411872-152535127;152535034-152535126	152411160-152411878;152412480-152412606;152534941-152535033;152535127-152536092	152535034-152535126
62	MFSD10	ENSG00000109736.15	ENSG00000109736.15:s:2931061-2931150	0.0003;-0.0003	2.964e-04;2.964e-04	7.507e-01;7.507e-01	0.0250;0.9750	0.0323;0.9677	s|1e1.1o1|i	2	2	0;0	chr4	-	2930953-2931061;2930954-2931060	2930561-2930953;2931061-2931150	2930954-2931060
63	MFSD10	ENSG00000109736.15	ENSG00000109736.15:s:2933106-2933209	0.0000;0.0000;-0.0001	2.961e-04;2.961e-04;1.171e-03	7.915e-01;7.915e-01;5.919e-01	0.0238;0.0238;0.9524	0.0247;0.0247;0.9505	s|1e1.1o2|1e1.2o2|i	3	2	0;0;0	chr4	-	2932758-2933106;2932690-2933106;2932759-2933105	2932600-2932758;2933106-2933209	2932759-2933105
64	HSPA8	ENSG00000109971.14	ENSG00000109971.14:s:123058632-123058830	-0.0001;-0.0001;0.0003	1.289e-04;1.289e-04;5.111e-04	8.358e-01;8.358e-01;6.618e-01	0.0208;0.0208;0.9583	0.0208;0.0208;0.9583	s|1e2.1o1|2e1.1o1|i	3	3	0;0;0	chr11	-	123057828-123058767;123058484-123058632;123058485-123058631	123057489-123057828;123058252-123058484;123058632-123058830	123058485-123058631
65	HSPA8	ENSG00000109971.14	ENSG00000109971.14:s:123059059-123059103	-0.0006;0.0006	4.995e-05;4.995e-05	8.636e-01;8.636e-01	0.0217;0.9783	0.0147;0.9853	s|1e1.1o1|i	2	2	0;0	chr11	-	123058830-123059059;123058831-123059058	123058632-123058830;123059059-123059103	123058831-123059058
66	HSPA8	ENSG00000109971.14	ENSG00000109971.14:s:123060116-123060426	-0.0002;-0.0002;0.0004	1.755e-04;1.755e-04;6.929e-04	8.212e-01;8.212e-01;6.383e-01	0.0222;0.0222;0.9556	0.0215;0.0215;0.9569	s|1e1.1o1|1e2.1o1|i	3	3	0;0;0	chr11	-	123060028-123060116;123059762-123060116;123060029-123060115	123059473-123059762;123059965-123060028;123060116-123060426	123060029-123060115
67	HSPA8	ENSG00000109971.14	ENSG00000109971.14:s:123060698-123060798	-0.0000;-0.0000;0.0000	2.247e-21;2.247e-21;2.043e-21	1.000e+00;1.000e+00;1.000e+00	0.0012;0.0012;0.9977	0.0004;0.0004;0.9992	s|1e2.1o1|2e1.1o1|i	3	3	0;0;0	chr11	-	123059103-123060705;123059848-123060698;123060676-123060697	123059059-123059103;123059814-123059848;123060698-123060798	123060676-123060697
68	HSPA8	ENSG00000109971.14	ENSG00000109971.14:t:123057489-123057828	0.0000;0.0000	2.247e-21;2.043e-21	1.000e+00;1.000e+00	0.0010;0.9990	0.0004;0.9996	t|1e1.1o2|i	2	2	0;0	chr11	-	123057828-123058767;123057829-123057878	123057489-123057828;123058632-123058830	123057829-123057878
69	HSPA8	ENSG00000109971.14	ENSG00000109971.14:t:123059059-123059103	-0.0000;0.0000	2.247e-21;2.043e-21	1.000e+00;1.000e+00	0.0015;0.9985	0.0005;0.9995	t|1e1.1o2|i	2	2	0;0	chr11	-	123059103-123060705;123059104-123059155	123059059-123059103;123060698-123060798	123059104-123059155
70	HSPA8	ENSG00000109971.14	ENSG00000109971.14:t:123059473-123059762	-0.0000;0.0000	2.247e-21;2.043e-21	1.000e+00;1.000e+00	0.0019;0.9981	0.0008;0.9992	t|1e1.1o1|i	2	2	0;0	chr11	-	123059762-123060116;123059763-123059813	123059473-123059762;123060116-123060426	123059763-123059813
71	HSPA8	ENSG00000109971.14	ENSG00000109971.14:t:123059814-123059848	-0.0000;0.0000	2.247e-21;2.043e-21	1.000e+00;1.000e+00	0.0017;0.9983	0.0006;0.9994	t|1e1.2o2|i	2	2	0;0	chr11	-	123059848-123060698;123059849-123059964	123059814-123059848;123060698-123060798	123059849-123059964
72	HSPA8	ENSG00000109971.14	ENSG00000109971.14:t:123060593-123060675	-0.0000;0.0000	2.247e-21;2.043e-21	1.000e+00;1.000e+00	0.0017;0.9983	0.0006;0.9994	t|1e1.1o1|i	2	2	0;0	chr11	-	123060675-123061120;123060676-123060697	123060593-123060675;123060825-123061332	123060676-123060697
73	SBF1	ENSG00000100241.22	ENSG00000100241.22:s:50445000-50445750	-0.0001;-0.0001;0.0002	1.992e-08;1.992e-08;9.359e-08	9.896e-01;9.896e-01;9.689e-01	0.0064;0.0064;0.9872	0.0050;0.0050;0.9900	s|1e1.1o1|1e2.1o1|i	3	3	0;0;0	chr22	-	50444978-50445618;50444453-50445618;50444979-50444999	50443219-50444453;50444629-50444978;50445000-50445750	50444979-50444999
74	SBF1	ENSG00000100241.22	ENSG00000100241.22:s:50446806-50447240	-0.0002;0.0002	1.680e-06;1.680e-06	9.476e-01;9.476e-01	0.0137;0.9863	0.0106;0.9894	s|1e1.1o1|i	2	2	0;0	chr22	-	50445744-50447089;50445751-50446805	50445000-50445750;50446806-50447240	50445751-50446805
75	SBF1	ENSG00000100241.22	ENSG00000100241.22:s:50459970-50460159	-0.0000;0.0000	8.730e-11;1.459e-10	9.969e-01;9.969e-01	0.0064;0.9936	0.0045;0.9955	s|1e1.1o1|i	2	2	0;0	chr22	-	50459666-50459970;50459957-50459969	50459470-50459666;50459970-50460159	50459957-50459969
76	SBF1	ENSG00000100241.22	ENSG00000100241.22:t:50443219-50444453	-0.0001;0.0001	1.490e-07;1.490e-07	9.732e-01;9.732e-01	0.0105;0.9895	0.0087;0.9913	t|1e1.1o1|i	2	2	0;0	chr22	-	50444453-50445618;50444454-50444628	50443219-50444453;50445000-50445750	50444454-50444628
77	SDR39U1	ENSG00000100445.18	ENSG00000100445.18:s:24440783-24440976	-0.0001;-0.0001;-0.0001;0.0005	5.347e-05;5.347e-05;5.347e-05;4.514e-04	8.988e-01;8.988e-01;8.988e-01;6.638e-01	0.0139;0.0139;0.0139;0.9583	0.0125;0.0125;0.0125;0.9625	s|1e1.1o3|1e1.2o3|1e1.3o3|i	4	2	0;0;0;0	chr14	-	24440601-24440783;24440492-24440783;24440408-24440783;24440602-24440782	24439766-24440601;24440783-24440976	24440602-24440782
78	SDR39U1	ENSG00000100445.18	ENSG00000100445.18:s:24442098-24442281	-0.0001;-0.0001;-0.0001;-0.0001;-0.0001;-0.0001;0.0006	7.820e-05;7.820e-05;7.820e-05;7.820e-05;7.820e-05;7.820e-05;1.974e-03	9.132e-01;9.132e-01;9.132e-01;9.132e-01;9.132e-01;9.132e-01;5.003e-01	0.0102;0.0102;0.0102;0.0102;0.0102;0.0102;0.9388	0.0102;0.0102;0.0102;0.0102;0.0102;0.0102;0.9388	s|1e1.1o1|1e2.1o1|2e1.1o1|2e2.1o1|3e1.1o1|3e2.1o1|i	7	3	0;0;0;0;0;0;0	chr14	-	24441795-24442178;24440926-24442178;24441795-24442109;24440926-24442109;24441795-24442098;24440926-24442098;24441796-24442097	24440783-24440976;24441009-24441795;24442098-24442281	24441796-24442097
79	SDR39U1	ENSG00000100445.18	ENSG00000100445.18:t:24441009-24441795	-0.0001;-0.0001;-0.0001;-0.0001;0.0006	1.250e-04;1.250e-04;1.250e-04;1.250e-04;1.678e-03	8.764e-01;8.764e-01;8.764e-01;8.764e-01;5.253e-01	0.0143;0.0143;0.0143;0.0143;0.9429	0.0143;0.0143;0.0143;0.0143;0.9429	t|1e1.1o1|1e2.1o3|1e2.2o3|1e2.3o3|i	5	3	0;0;0;0;0	chr14	-	24441795-24442346;24441795-24442178;24441795-24442109;24441795-24442098;24441796-24442097	24441009-24441795;24442098-24442281;24442324-24442694	24441796-24442097
80	GALNT16	ENSG00000100626.17	ENSG00000100626.17:s:69352029-69352170	-0.0002;-0.0002;0.0005	2.046e-04;2.046e-04;8.065e-04	8.082e-01;8.082e-01;6.189e-01	0.0238;0.0238;0.9524	0.0222;0.0222;0.9556	s|1e1.1o2|1e1.2o2|i	3	2	0;0;0	chr14	+	69352170-69353332;69352170-69353771;69352171-69353331	69352029-69352170;69353332-69353968	69352171-69353331
81	GALNT16	ENSG00000100626.17	ENSG00000100626.17:t:69354314-69357033	-0.0006;0.0006	1.539e-04;1.539e-04	7.959e-01;7.959e-01	0.0278;0.9722	0.0208;0.9792	t|1e1.2o2|i	2	2	0;0	chr14	+	69351741-69354314;69353969-69354313	69347877-69351741;69354314-69357033	69353969-69354313
82	TM9SF1	ENSG00000100926.15	ENSG00000100926.15:s:24194947-24195051	-0.0003;0.0003	3.109e-06;3.109e-06	9.353e-01;9.353e-01	0.0149;0.9851	0.0116;0.9884	s|1e1.3o3|i	2	2	0;0	chr14	-	24190435-24194947;24194831-24194946	24190042-24190653;24194947-24195051	24194831-24194946
83	TM9SF1	ENSG00000100926.15	ENSG00000100926.15:s:24195550-24195687	0.0003;-0.0003	9.888e-04;9.888e-04	6.464e-01;6.464e-01	0.0357;0.9643	0.0455;0.9545	s|1e1.2o2|i	2	2	0;0	chr14	-	24195036-24195550;24195454-24195549	24194947-24195051;24195550-24195687	24195454-24195549
84	TM9SF1	ENSG00000100926.15	ENSG00000100926.15:t:24194675-24194830	-0.0001;-0.0001;0.0004	1.400e-06;1.400e-06;6.018e-06	9.630e-01;9.630e-01;9.022e-01	0.0100;0.0100;0.9801	0.0078;0.0078;0.9845	t|1e1.1o1|1e2.1o1|i	3	3	0;0;0	chr14	-	24194830-24195346;24194830-24195309;24194831-24194946	24194675-24194830;24195309-24195334;24195346-24195453	24194831-24194946
85	PLD3	ENSG00000105223.20	ENSG00000105223.20:s:40365553-40365585	-0.0002;-0.0002;-0.0002;0.0008	1.896e-06;1.896e-06;1.896e-06;1.740e-05	9.723e-01;9.723e-01;9.723e-01;8.754e-01	0.0081;0.0081;0.0081;0.9758	0.0052;0.0052;0.0052;0.9844	s|1e1.2o2|1e2.1o2|1e2.2o2|i	4	3	0;0;0;0	chr19	+	40365585-40365718;40365585-40366384;40365585-40366419;40365586-40365661	40365553-40365585;40365662-40365930;40366293-40366510	40365586-40365661
86	PLD3	ENSG00000105223.20	ENSG00000105223.20:t:40365662-40365930	-0.0001;-0.0001;-0.0001;-0.0001;-0.0001;0.0010	1.031e-06;1.031e-06;1.031e-06;1.031e-06;1.031e-06;2.296e-05	9.832e-01;9.832e-01;9.832e-01;9.832e-01;9.832e-01;8.551e-01	0.0054;0.0054;0.0054;0.0054;0.0054;0.9731	0.0035;0.0035;0.0035;0.0035;0.0035;0.9826	t|1e1.2o2|2e1.1o2|2e1.2o2|2e2.1o1|2e3.1o1|i	6	4	0;0;0;0;0;0	chr19	+	40348768-40365662;40348724-40365718;40348768-40365718;40359695-40365718;40365585-40365718;40365586-40365661	40348456-40348768;40359642-40359695;40365553-40365585;40365662-40365930	40365586-40365661
87	CDK5RAP3	ENSG00000108465.15	ENSG00000108465.15:s:47974581-47974789	-0.0001;0.0001	9.190e-06;9.190e-06	9.040e-01;9.040e-01	0.0167;0.9833	0.0168;0.9832	s|1e1.3o3|i	2	2	0;0	chr17	+	47974688-47975218;47974790-47975022	47974581-47974789;47975159-47975337	47974790-47975022
88	CDK5RAP3	ENSG00000108465.15	ENSG00000108465.15:s:47975514-47975653	0.0004;0.0004;-0.0009	1.714e-04;1.714e-04;6.844e-04	8.353e-01;8.353e-01;6.578e-01	0.0159;0.0159;0.9683	0.0230;0.0230;0.9540	s|1e1.1o1|2e1.1o1|i	3	2	0;0;0	chr17	+	47975638-47975869;47975653-47975869;47975654-47975868	47975514-47975653;47975869-47976013	47975654-47975868
89	CDK5RAP3	ENSG00000108465.15	ENSG00000108465.15:s:47981437-47981459	-0.0003;0.0003	4.744e-06;4.744e-06	9.259e-01;9.259e-01	0.0167;0.9833	0.0122;0.9878	s|1e1.1o1|i	2	2	0;0	chr17	+	47981459-47981587;47981460-47981586	47981437-47981459;47981587-47981781	47981460-47981586
90	CDK5RAP3	ENSG00000108465.15	ENSG00000108465.15:t:47975023-47975098	-0.0001;0.0001	9.190e-06;9.190e-06	9.040e-01;9.040e-01	0.0167;0.9833	0.0168;0.9832	t|1e1.1o1|i	2	2	0;0	chr17	+	47974448-47975023;47974790-47975022	47974400-47974575;47975023-47975098	47974790-47975022
91	NLK	ENSG00000087095.13	ENSG00000087095.13:s:28194582-28194985	-0.0004;0.0004	1.232e-04;1.232e-04	8.075e-01;8.075e-01	0.0263;0.9737	0.0213;0.9787	s|1e1.1o1|i	2	2	0;0	chr17	+	28194708-28196180;28194986-28196179	28194582-28194985;28196180-28196381	28194986-28196179
92	KLHL42	ENSG00000087448.11	ENSG00000087448.11:s:27780048-27780381	-0.0004;0.0004	4.974e-06;4.974e-06	9.377e-01;9.377e-01	0.0159;0.9841	0.0097;0.9903	s|1e1.1o1|i	2	2	0;0	chr12	+	27780381-27791708;27780382-27780866	27780048-27780381;27791708-27792143	27780382-27780866
93	GNA11	ENSG00000088256.9	ENSG00000088256.9:s:3120989-3121319	-0.0000;0.0000	5.136e-10;5.380e-10	9.962e-01;9.962e-01	0.0061;0.9939	0.0049;0.9951	s|1e1.1o1|i	2	2	0;0	chr19	+	3121173-3121345;3121320-3121344	3120989-3121319;3121345-3123999	3121320-3121344
94	ANAPC5	ENSG00000089053.13	ENSG00000089053.13:t:121345839-121345951	-0.0001;0.0001	1.552e-07;1.552e-07	9.710e-01;9.710e-01	0.0100;0.9900	0.0095;0.9905	t|1e1.1o1|i	2	2	0;0	chr12	-	121345951-121346036;121345952-121345998	121345839-121345951;121346036-121346126	121345952-121345998
95	GLG1	ENSG00000090863.12	ENSG00000090863.12:s:74452790-74453334	-0.0001;0.0001	1.546e-08;1.550e-08	9.861e-01;9.861e-01	0.0084;0.9916	0.0069;0.9931	s|1e1.1o1|i	2	2	0;0	chr16	-	74452131-74453171;74452132-74452789	74447427-74452131;74452790-74453334	74452132-74452789
96	GLG1	ENSG00000090863.12	ENSG00000090863.12:s:74606939-74607144	-0.0002;0.0002	8.987e-08;8.988e-08	9.797e-01;9.797e-01	0.0102;0.9898	0.0068;0.9932	s|1e1.1o1|i	2	2	0;0	chr16	-	74606827-74606939;74606828-74606938	74606657-74606827;74606939-74607144	74606828-74606938
97	MKNK2	ENSG00000099875.16	ENSG00000099875.16:t:2037465-2037829	-0.0003;-0.0003;0.0006	6.801e-06;6.801e-06;2.834e-05	9.409e-01;9.409e-01;8.534e-01	0.0126;0.0126;0.9748	0.0093;0.0093;0.9815	t|1e1.1o1|1e2.1o1|i	3	3	0;0;0	chr19	-	2037829-2040134;2037829-2039631;2037830-2038247	2037465-2037829;2038248-2039856;2039955-2040177	2037830-2038247
98	SPECC1L	ENSG00000100014.20	ENSG00000100014.20:s:24321288-24321323	-0.0001;-0.0001;0.0002	5.424e-07;5.424e-07;2.362e-06	9.740e-01;9.740e-01;9.284e-01	0.0085;0.0085;0.9830	0.0072;0.0072;0.9855	s|1e1.1o1|1e2.1o1|i	3	3	0;0;0	chr22	+	24321323-24321405;24321323-24324220;24321324-24321404	24321288-24321323;24321405-24322918;24324220-24324427	24321324-24321404
99	RPL3	ENSG00000100316.16	ENSG00000100316.16:s:39317396-39317629	-0.0003;-0.0003;0.0008	1.550e-04;1.550e-04;6.141e-04	8.291e-01;8.291e-01;6.506e-01	0.0215;0.0215;0.9569	0.0185;0.0185;0.9630	s|1e1.1o2|1e1.2o2|i	3	2	0;0;0	chr22	-	39317021-39317461;39316841-39317461;39317069-39317395	39316706-39317021;39317396-39317629	39317069-39317395
100	REC8	ENSG00000100918.14	ENSG00000100918.14:s:24171853-24172365	-0.0002;-0.0002;0.0006	2.168e-06;2.168e-06;9.121e-06	9.659e-01;9.659e-01;9.091e-01	0.0100;0.0100;0.9801	0.0066;0.0066;0.9868	s|1e1.1o2|1e1.2o2|i	3	2	0;0;0	chr14	+	24172365-24172467;24172365-24172492;24172366-24172466	24171853-24172365;24172467-24172608	24172366-24172466
101	REC8	ENSG00000100918.14	ENSG00000100918.14:s:24177709-24177758	-0.0001;0.0001	1.432e-04;1.432e-04	7.978e-01;7.978e-01	0.0244;0.9756	0.0244;0.9756	s|1e1.1o1|i	2	2	0;0	chr14	+	24177758-24178091;24177759-24177839	24177709-24177758;24178091-24178100	24177759-24177839
102	REC8	ENSG00000100918.14	ENSG00000100918.14:s:24179800-24179906	-0.0005;-0.0005;0.0012	1.939e-04;1.939e-04;7.683e-04	8.214e-01;8.214e-01;6.372e-01	0.0256;0.0256;0.9487	0.0171;0.0171;0.9658	s|1e1.1o2|1e1.2o2|i	3	2	0;0;0	chr14	+	24179906-24180010;24179906-24180027;24179907-24180009	24179800-24179906;24180010-24180257	24179907-24180009
103	REC8	ENSG00000100918.14	ENSG00000100918.14:t:24177840-24177918	-0.0001;0.0001	1.432e-04;1.432e-04	7.978e-01;7.978e-01	0.0244;0.9756	0.0244;0.9756	t|1e1.1o1|i	2	2	0;0	chr14	+	24177222-24177840;24177759-24177839	24177141-24177222;24177840-24177918	24177759-24177839
104	REC8	ENSG00000100918.14	ENSG00000100918.14:t:24178091-24178100	-0.0003;0.0003	5.487e-05;5.487e-05	8.410e-01;8.410e-01	0.0227;0.9773	0.0192;0.9808	t|1e1.1o1|i	2	2	0;0	chr14	+	24177758-24178091;24177919-24178090	24177709-24177758;24178091-24178100	24177919-24178090
105	GINS1	ENSG00000101003.11	ENSG00000101003.11:s:25445923-25447685	-0.0001;-0.0001;-0.0001;0.0003	1.614e-04;1.614e-04;1.614e-04;1.336e-03	8.504e-01;8.504e-01;8.504e-01;5.606e-01	0.0179;0.0179;0.0179;0.9464	0.0167;0.0167;0.0167;0.9500	s|1e3.1o1|2e2.1o1|3e1.1o2|i	4	4	0;0;0;0	chr20	+	25446039-25452442;25447090-25448121;25447685-25447923;25447686-25447922	25445923-25447685;25447923-25448104;25448121-25449072;25452442-25452700	25447686-25447922
106	GINS1	ENSG00000101003.11	ENSG00000101003.11:t:25447923-25448104	-0.0001;-0.0001;0.0003	2.593e-04;2.593e-04;1.022e-03	7.977e-01;7.977e-01;6.022e-01	0.0238;0.0238;0.9524	0.0222;0.0222;0.9556	t|1e2.3o3|2e1.1o1|i	3	3	0;0;0	chr20	+	25447685-25447923;25441776-25448103;25447686-25447922	25441702-25441776;25445923-25447685;25447923-25448104	25447686-25447922
107	IFT20	ENSG00000109083.14	ENSG00000109083.14:t:28328325-28328733	-0.0002;-0.0002;-0.0002;0.0009	2.111e-04;2.111e-04;2.111e-04;1.749e-03	8.369e-01;8.369e-01;8.369e-01;5.337e-01	0.0208;0.0208;0.0208;0.9375	0.0161;0.0161;0.0161;0.9516	t|1e1.1o1|1e2.1o1|2e2.1o1|i	4	3	0;0;0;0	chr17	-	28328733-28330443;28328733-28329173;28328657-28329173;28328734-28328886	28328325-28328733;28329173-28329276;28330443-28330528	28328734-28328886
108	EIF4G2	ENSG00000110321.19	ENSG00000110321.19:s:10800244-10800348	-0.0000;-0.0000;0.0000	2.248e-21;2.248e-21;3.060e-13	9.998e-01;9.998e-01;9.992e-01	0.0029;0.0029;0.9941	0.0012;0.0012;0.9976	s|1e1.1o1|1e2.1o2|i	3	3	0;0;0	chr11	-	10800168-10800244;10799756-10800244;10800169-10800243	10799552-10799756;10800090-10800168;10800244-10800348	10800169-10800243
109	EIF4G2	ENSG00000110321.19	ENSG00000110321.19:s:10802049-10802209	0.0002;0.0002;-0.0005	1.019e-04;1.019e-04;4.080e-04	8.569e-01;8.569e-01;6.948e-01	0.0150;0.0150;0.9700	0.0201;0.0201;0.9597	s|1e1.1o1|1e2.1o1|i	3	3	0;0;0	chr11	-	10801774-10802049;10801087-10802049;10801775-10802048	10801055-10801588;10801661-10801774;10802049-10802209	10801775-10802048
110	EIF4G2	ENSG00000110321.19	ENSG00000110321.19:s:10803899-10804050	0.0002;-0.0002	6.752e-05;6.752e-05	8.520e-01;8.520e-01	0.0182;0.9818	0.0208;0.9792	s|1e1.1o1|i	2	2	0;0	chr11	-	10803590-10803899;10803591-10803898	10803480-10803590;10803899-10804050	10803591-10803898
111	ENO1	ENSG00000074800.16	ENSG00000074800.16:s:8870825-8870883	0.0002;0.0002;-0.0004	6.134e-05;6.134e-05;2.465e-04	8.808e-01;8.808e-01;7.364e-01	0.0139;0.0139;0.9722	0.0175;0.0175;0.9649	s|1e1.1o1|1e2.1o1|i	3	3	0;0;0	chr1	-	8870510-8870825;8868057-8870825;8870511-8870824	8867988-8868057;8870452-8870510;8870825-8870883	8870511-8870824
112	ENO1	ENSG00000074800.16	ENSG00000074800.16:s:8871891-8871986	-0.0000;-0.0000;-0.0000;-0.0000;0.0000	2.061e-05;2.061e-05;2.061e-05;2.061e-05;2.889e-04	9.357e-01;9.357e-01;9.357e-01;9.357e-01;6.886e-01	0.0095;0.0095;0.0095;0.0095;0.9619	0.0095;0.0095;0.0095;0.0095;0.9619	s|1e1.1o1|1e2.1o1|1e3.1o1|1e4.1o1|i	5	5	0;0;0;0;0	chr1	-	8870883-8871891;8870510-8871891;8870408-8871891;8868057-8871891;8871577-8871890	8867988-8868057;8870172-8870408;8870452-8870510;8870825-8870883;8871891-8871986	8871577-8871890
113	ENO1	ENSG00000074800.16	ENSG00000074800.16:t:8870452-8870510	0.0002;0.0002;-0.0004	6.134e-05;6.134e-05;2.465e-04	8.808e-01;8.808e-01;7.364e-01	0.0139;0.0139;0.9722	0.0175;0.0175;0.9649	t|1e1.1o1|1e2.1o1|i	3	3	0;0;0	chr1	-	8870510-8871891;8870510-8870825;8870511-8870824	8870452-8870510;8870825-8870883;8871891-8871986	8870511-8870824
114	SLC46A1	ENSG00000076351.13	ENSG00000076351.13:t:28404240-28404821	-0.0008;0.0008	9.177e-04;9.177e-04	6.532e-01;6.532e-01	0.0455;0.9545	0.0323;0.9677	t|1e1.1o1|i	2	2	0;0	chr17	-	28404768-28405681;28404822-28405047	28404240-28404821;28405681-28405747	28404822-28405047
115	FAM76B	ENSG00000077458.13	ENSG00000077458.13:s:95770115-95771650	-0.0005;0.0005	7.725e-05;7.725e-05	8.406e-01;8.406e-01	0.0238;0.9762	0.0179;0.9821	s|1e1.1o1|i	2	2	0;0	chr11	-	95768987-95771605;95768988-95770114	95768953-95768987;95770115-95771650	95768988-95770114
116	DCAF11	ENSG00000100897.18	ENSG00000100897.18:t:24115515-24115749	-0.0002;-0.0002;-0.0002;-0.0002;-0.0002;-0.0002;0.0018	1.320e-05;1.320e-05;1.320e-05;1.320e-05;1.320e-05;1.320e-05;3.570e-04	9.599e-01;9.599e-01;9.599e-01;9.599e-01;9.599e-01;9.599e-01;6.821e-01	0.0082;0.0082;0.0082;0.0082;0.0082;0.0082;0.9510	0.0045;0.0045;0.0045;0.0045;0.0045;0.0045;0.9732	t|1e1.1o2|1e3.1o1|2e1.1o2|2e1.2o2|2e2.1o1|2e3.1o1|i	7	4	0;0;0;0;0;0;0	chr14	+	24114924-24115515;24115392-24115515;24114924-24115543;24114969-24115543;24115293-24115543;24115392-24115543;24115393-24115514	24114627-24114969;24115176-24115293;24115315-24115392;24115515-24115749	24115393-24115514
117	FBXL20	ENSG00000108306.13	ENSG00000108306.13:s:39260587-39261567	-0.0004;0.0004	3.426e-04;3.426e-04	7.324e-01;7.324e-01	0.0357;0.9643	0.0278;0.9722	s|1e1.1o1|i	2	2	0;0	chr17	-	39259296-39261452;39259297-39260586	39252663-39259296;39260587-39261567	39259297-39260586
118	CASC3	ENSG00000108349.17	ENSG00000108349.17:s:40163481-40163602	-0.0000;0.0000	1.742e-11;2.412e-11	9.985e-01;9.985e-01	0.0055;0.9945	0.0032;0.9968	s|1e1.1o1|i	2	2	0;0	chr17	+	40163602-40163886;40163603-40163885	40163481-40163602;40163886-40164166	40163603-40163885
119	ATP5F1B	ENSG00000110955.9	ENSG00000110955.9:t:56639959-56640150	-0.0000;0.0000	2.247e-21;2.043e-21	1.000e+00;1.000e+00	0.0026;0.9974	0.0017;0.9983	t|1e1.1o2|i	2	2	0;0	chr12	-	56640150-56645218;56640151-56640159	56639959-56640150;56645171-56645353	56640151-56640159
120	PHC1	ENSG00000111752.11	ENSG00000111752.11:s:8930612-8930672	-0.0003;0.0003	4.457e-06;4.457e-06	9.281e-01;9.281e-01	0.0161;0.9839	0.0116;0.9884	s|1e1.1o1|i	2	2	0;0	chr12	+	8930672-8939871;8930673-8930915	8930612-8930672;8939871-8940404	8930673-8930915
121	PHC1	ENSG00000111752.11	ENSG00000111752.11:s:8932563-8933063	-0.0003;-0.0003;-0.0003;-0.0003;0.0017	1.404e-05;1.404e-05;1.404e-05;1.404e-05;2.016e-04	9.506e-01;9.506e-01;9.506e-01;9.506e-01;7.382e-01	0.0105;0.0105;0.0105;0.0105;0.9579	0.0056;0.0056;0.0056;0.0056;0.9778	s|1e1.3o3|2e1.1o3|2e2.1o1|3e1.2o3|i	5	3	0;0;0;0;0	chr12	+	8932813-8933307;8932831-8933207;8932831-8933865;8933063-8933255;8933064-8933206	8932563-8933063;8933207-8933350;8933537-8934012	8933064-8933206
122	PHC1	ENSG00000111752.11	ENSG00000111752.11:s:8939305-8939564	-0.0005;0.0005	1.123e-05;1.123e-05	9.104e-01;9.104e-01	0.0189;0.9811	0.0125;0.9875	s|1e1.1o1|i	2	2	0;0	chr12	+	8939564-8939729;8939565-8939728	8939305-8939564;8939729-8939822	8939565-8939728
123	PHC1	ENSG00000111752.11	ENSG00000111752.11:s:8939729-8939822	-0.0002;0.0002	1.429e-06;1.429e-06	9.454e-01;9.454e-01	0.0133;0.9867	0.0117;0.9883	s|1e1.1o1|i	2	2	0;0	chr12	+	8939822-8940576;8939823-8939870	8939729-8939822;8940576-8941467	8939823-8939870
124	PHC1	ENSG00000111752.11	ENSG00000111752.11:t:8922733-8922788	-0.0003;0.0003	3.505e-06;3.505e-06	9.403e-01;9.403e-01	0.0145;0.9855	0.0105;0.9895	t|1e1.1o1|i	2	2	0;0	chr12	+	8922656-8922733;8922721-8922732	8922633-8922656;8922733-8922788	8922721-8922732
125	PHC1	ENSG00000111752.11	ENSG00000111752.11:t:8939871-8940404	-0.0002;0.0002	1.429e-06;1.429e-06	9.454e-01;9.454e-01	0.0133;0.9867	0.0117;0.9883	t|1e1.1o1|i	2	2	0;0	chr12	+	8930672-8939871;8939823-8939870	8930612-8930672;8939871-8940404	8939823-8939870
126	PHC1	ENSG00000111752.11	ENSG00000111752.11:t:8940576-8941467	-0.0001;0.0001	8.200e-08;8.204e-08	9.790e-01;9.790e-01	0.0091;0.9909	0.0081;0.9919	t|1e1.1o1|i	2	2	0;0	chr12	+	8939822-8940576;8940405-8940575	8939729-8939822;8940576-8941467	8940405-8940575
127	APH1A	ENSG00000117362.13	ENSG00000117362.13:s:150266349-150266656	-0.0001;0.0001	8.649e-08;8.654e-08	9.773e-01;9.773e-01	0.0097;0.9903	0.0085;0.9915	s|1e1.1o1|i	2	2	0;0	chr1	-	150266194-150266533;150266195-150266348	150265399-150266194;150266349-150266656	150266195-150266348
128	WDR55	ENSG00000120314.19	ENSG00000120314.19:s:140666575-140668334	-0.0003;0.0003	3.838e-04;3.838e-04	7.281e-01;7.281e-01	0.0333;0.9667	0.0294;0.9706	s|1e1.1o1|i	2	2	0;0	chr5	+	140668334-140668415;140668335-140668414	140666575-140668334;140668415-140668502	140668335-140668414
129	WDR55	ENSG00000120314.19	ENSG00000120314.19:s:140669333-140669690	-0.0004;-0.0004;0.0009	1.756e-04;1.756e-04;6.942e-04	8.202e-01;8.202e-01;6.368e-01	0.0238;0.0238;0.9524	0.0185;0.0185;0.9630	s|1e1.1o2|1e1.2o2|i	3	2	0;0;0	chr5	+	140669690-140671269;140669690-140671322;140669691-140671268	140669333-140669690;140671269-140672366	140669691-140671268
130	MCF2L	ENSG00000126217.21	ENSG00000126217.21:s:113096550-113096653	-0.0001;0.0001	1.744e-05;1.744e-05	8.930e-01;8.930e-01	0.0175;0.9825	0.0167;0.9833	s|1e1.1o1|i	2	2	0;0	chr13	+	113096653-113096774;113096654-113096773	113096550-113096653;113096774-113099742	113096654-113096773
131	NTN4	ENSG00000074527.13	ENSG00000074527.13:s:95790728-95790764	-0.0012;0.0012	8.046e-04;8.046e-04	6.864e-01;6.864e-01	0.0417;0.9583	0.0250;0.9750	s|1e1.1o1|i	2	2	0;0	chr12	-	95790254-95790728;95790331-95790727	95790251-95790254;95790728-95790764	95790331-95790727
132	ACTB	ENSG00000075624.17	ENSG00000075624.17:s:5527733-5527783	0.0000;0.0000	2.247e-21;2.043e-21	1.000e+00;1.000e+00	0.0008;0.9992	0.0003;0.9997	s|1e1.1o1|i	2	2	0;0	chr7	-	5527611-5527733;5527612-5527732	5526409-5527611;5527733-5527783	5527612-5527732
133	ACTB	ENSG00000075624.17	ENSG00000075624.17:s:5527969-5528098	0.0001;0.0001;-0.0003	6.372e-05;6.372e-05;2.553e-04	8.694e-01;8.694e-01;7.176e-01	0.0159;0.0159;0.9683	0.0185;0.0185;0.9630	s|1e1.1o2|2e1.2o2|i	3	2	0;0;0	chr7	-	5527891-5528004;5527867-5527969;5527892-5527968	5527798-5527891;5527969-5528098	5527892-5527968
134	ACTB	ENSG00000075624.17	ENSG00000075624.17:s:5529535-5529733	0.0006;0.0006;-0.0015	1.808e-04;1.808e-04;7.251e-04	8.384e-01;8.384e-01;6.610e-01	0.0129;0.0129;0.9743	0.0256;0.0256;0.9487	s|1e2.1o1|2e1.1o1|i	3	3	0;0;0	chr7	-	5527783-5529571;5529400-5529535;5529401-5529534	5527733-5527783;5529067-5529400;5529535-5529733	5529401-5529534
135	ACTB	ENSG00000075624.17	ENSG00000075624.17:t:5527733-5527783	0.0000;0.0000	2.247e-21;2.043e-21	1.000e+00;1.000e+00	0.0010;0.9990	0.0005;0.9995	t|1e1.1o2|i	2	2	0;0	chr7	-	5527783-5529571;5527784-5527797	5527733-5527783;5529535-5529733	5527784-5527797
136	ACTB	ENSG00000075624.17	ENSG00000075624.17:t:5528281-5528707	-0.0000;-0.0000;0.0000	4.871e-11;4.871e-11;3.102e-10	9.984e-01;9.984e-01;9.945e-01	0.0039;0.0039;0.9922	0.0033;0.0033;0.9934	t|1e1.2o2|2e1.1o2|i	3	2	0;0;0	chr7	-	5528707-5529150;5528671-5529161;5528708-5528716	5528281-5528707;5529067-5529400	5528708-5528716
137	ACTB	ENSG00000075624.17	ENSG00000075624.17:t:5528717-5528719	-0.0000;-0.0000;-0.0000;0.0001	2.081e-08;2.081e-08;2.081e-08;2.169e-07	9.928e-01;9.928e-01;9.928e-01;9.606e-01	0.0045;0.0045;0.0045;0.9866	0.0041;0.0041;0.0041;0.9877	t|1e1.2o2|1e2.1o2|1e3.1o1|i	4	4	0;0;0;0	chr7	-	5528719-5530524;5528719-5529161;5528719-5529019;5528720-5528933	5528717-5528719;5528934-5529059;5529067-5529400;5530524-5530627	5528720-5528933
138	ACTB	ENSG00000075624.17	ENSG00000075624.17:t:5529067-5529400	0.0006;0.0006;-0.0015	1.808e-04;1.808e-04;7.251e-04	8.384e-01;8.384e-01;6.610e-01	0.0129;0.0129;0.9743	0.0256;0.0256;0.9487	t|1e1.2o2|1e2.2o2|i	3	3	0;0;0	chr7	-	5529400-5530524;5529400-5529535;5529401-5529534	5529067-5529400;5529535-5529733;5530524-5530627	5529401-5529534
139	ACTB	ENSG00000075624.17	ENSG00000075624.17:t:5529535-5529733	-0.0000;-0.0000;-0.0000;-0.0000;-0.0000;-0.0000;-0.0000;0.0003	7.551e-06;7.551e-06;7.551e-06;7.551e-06;7.551e-06;7.551e-06;7.551e-06;2.571e-04	9.662e-01;9.662e-01;9.662e-01;9.662e-01;9.662e-01;9.662e-01;9.662e-01;6.840e-01	0.0053;0.0053;0.0053;0.0053;0.0053;0.0053;0.0053;0.9627	0.0057;0.0057;0.0057;0.0057;0.0057;0.0057;0.0057;0.9602	t|1e4.2o2|2e4.1o2|3e1.1o1|3e2.1o2|3e3.1o1|3e4.2o2|3e5.1o1|i	8	6	0;0;0;0;0;0;0;0	chr7	-	5529733-5530524;5529684-5530542;5529663-5563714;5529663-5562574;5529663-5540676;5529663-5530524;5529663-5529806;5529734-5529805	5529535-5529733;5529806-5529982;5530524-5530627;5540676-5540771;5562390-5562828;5563714-5563902	5529734-5529805
140	LRCH4	ENSG00000077454.17	ENSG00000077454.17:t:100574011-100574356	-0.0008;0.0008	6.208e-04;6.208e-04	6.915e-01;6.915e-01	0.0401;0.9599	0.0294;0.9706	t|1e1.1o1|i	2	2	0;0	chr7	-	100574356-100575705;100574357-100574659	100574011-100574356;100575705-100575782	100574357-100574659
141	ARAF	ENSG00000078061.14	ENSG00000078061.14:s:47571323-47571406	-0.0001;0.0001	2.681e-04;2.681e-04	7.583e-01;7.583e-01	0.0278;0.9722	0.0270;0.9730	s|1e1.1o1|i	2	2	0;0	chrX	+	47571406-47571521;47571407-47571520	47571323-47571406;47571521-47571908	47571407-47571520
142	DLGAP4	ENSG00000080845.19	ENSG00000080845.19:s:36500197-36500360	-0.0000;0.0000	2.250e-21;1.930e-12	9.991e-01;9.991e-01	0.0051;0.9949	0.0026;0.9974	s|1e1.1o1|i	2	2	0;0	chr20	+	36500275-36500507;36500361-36500506	36500197-36500360;36500507-36500611	36500361-36500506
143	SEMA4G	ENSG00000095539.15	ENSG00000095539.15:s:100983305-100983808	-0.0007;0.0007	2.260e-04;2.260e-04	7.735e-01;7.735e-01	0.0312;0.9688	0.0217;0.9783	s|1e1.1o1|i	2	2	0;0	chr10	+	100983808-100984490;100983809-100984211	100983305-100983808;100984490-100985616	100983809-100984211
144	ABHD4	ENSG00000100439.11	ENSG00000100439.11:s:22611541-22611692	-0.0005;0.0005	7.365e-04;7.365e-04	6.736e-01;6.736e-01	0.0417;0.9583	0.0312;0.9688	s|1e1.1o1|i	2	2	0;0	chr14	+	22611692-22612004;22611693-22612003	22611541-22611692;22612004-22612963	22611693-22612003
145	EIF5	ENSG00000100664.11	ENSG00000100664.11:s:103334189-103334260	-0.0006;-0.0006;0.0015	5.211e-04;5.211e-04;2.075e-03	7.534e-01;7.534e-01;5.353e-01	0.0318;0.0318;0.9364	0.0208;0.0208;0.9583	s|1e1.1o1|1e2.1o3|i	3	3	0;0;0	chr14	+	103334260-103334389;103334260-103335653;103334261-103334386	103334189-103334260;103334387-103334597;103335481-103335932	103334261-103334386
146	EIF5	ENSG00000100664.11	ENSG00000100664.11:s:103340963-103341356	-0.0001;0.0001	2.972e-10;3.517e-10	9.963e-01;9.963e-01	0.0068;0.9932	0.0028;0.9972	s|1e1.1o1|i	2	2	0;0	chr14	+	103341125-103342159;103341357-103342158	103340963-103341356;103342159-103345025	103341357-103342158
147	EIF5	ENSG00000100664.11	ENSG00000100664.11:t:103334387-103334597	-0.0006;-0.0006;0.0015	5.211e-04;5.211e-04;2.075e-03	7.534e-01;7.534e-01;5.353e-01	0.0318;0.0318;0.9364	0.0208;0.0208;0.9583	t|1e1.1o1|1e2.1o1|i	3	3	0;0;0	chr14	+	103333663-103334389;103334260-103334389;103334261-103334386	103333544-103333663;103334189-103334260;103334387-103334597	103334261-103334386
148	NOMO1	ENSG00000103512.16	ENSG00000103512.16:s:14895514-14895694	0.0002;-0.0002	3.823e-04;3.823e-04	7.312e-01;7.312e-01	0.0257;0.9743	0.0345;0.9655	s|1e1.1o1|i	2	2	0;0	chr16	+	14895694-14895973;14895695-14895972	14895514-14895694;14895973-14896157	14895695-14895972
149	ARHGEF18	ENSG00000104880.19	ENSG00000104880.19:s:7470126-7470315	-0.0005;0.0005	4.055e-05;4.055e-05	8.651e-01;8.651e-01	0.0217;0.9783	0.0156;0.9844	s|1e1.1o1|i	2	2	0;0	chr19	+	7470315-7470537;7470316-7470536	7470126-7470315;7470537-7472485	7470316-7470536
150	TLE5	ENSG00000104964.15	ENSG00000104964.15:t:3052910-3053458	-0.0000;0.0000	2.247e-21;2.043e-21	1.000e+00;1.000e+00	0.0023;0.9977	0.0012;0.9988	t|1e1.1o1|i	2	2	0;0	chr19	-	3053458-3056312;3053459-3053548	3052910-3053458;3056312-3056768	3053459-3053548
151	ASB1	ENSG00000065802.12	ENSG00000065802.12:t:238451785-238452250	-0.0002;-0.0002;0.0004	2.210e-05;2.210e-05;8.988e-05	9.104e-01;9.104e-01;7.922e-01	0.0145;0.0145;0.9710	0.0123;0.0123;0.9753	t|1e1.1o1|1e2.1o1|i	3	3	0;0;0	chr2	+	238446655-238451785;238450259-238451785;238450260-238451784	238446384-238446655;238450145-238450259;238451785-238452250	238450260-238451784
152	ARFGEF1	ENSG00000066777.9	ENSG00000066777.9:s:67343510-67343781	-0.0003;0.0003	6.803e-05;6.803e-05	8.388e-01;8.388e-01	0.0222;0.9778	0.0200;0.9800	s|1e1.1o1|i	2	2	0;0	chr8	-	67343336-67343510;67343337-67343509	67343164-67343336;67343510-67343781	67343337-67343509
153	GBA2	ENSG00000070610.14	ENSG00000070610.14:s:35737748-35737939	0.0001;0.0001;-0.0003	2.283e-05;2.283e-05;9.305e-05	9.110e-01;9.110e-01;7.930e-01	0.0115;0.0115;0.9770	0.0145;0.0145;0.9710	s|1e1.1o2|1e1.2o2|i	3	2	0;0;0	chr9	-	35737604-35737748;35737447-35737748;35737605-35737747	35736866-35737604;35737748-35737939	35737605-35737747
154	GBA2	ENSG00000070610.14	ENSG00000070610.14:s:35738232-35738374	0.0001;-0.0001	7.377e-05;7.377e-05	8.274e-01;8.274e-01	0.0204;0.9796	0.0250;0.9750	s|1e1.1o1|i	2	2	0;0	chr9	-	35738152-35738232;35738153-35738231	35738037-35738152;35738232-35738374	35738153-35738231
155	GBA2	ENSG00000070610.14	ENSG00000070610.14:s:35738526-35738635	-0.0004;0.0004	5.306e-05;5.306e-05	8.529e-01;8.529e-01	0.0217;0.9783	0.0175;0.9825	s|1e1.1o1|i	2	2	0;0	chr9	-	35738374-35738526;35738375-35738525	35738232-35738374;35738526-35738635	35738375-35738525
156	GBA2	ENSG00000070610.14	ENSG00000070610.14:s:35738752-35738903	0.0002;-0.0002	9.197e-05;9.197e-05	8.292e-01;8.292e-01	0.0208;0.9792	0.0233;0.9767	s|1e1.1o1|i	2	2	0;0	chr9	-	35738632-35738752;35738636-35738751	35738526-35738635;35738752-35738903	35738636-35738751
157	MBD3	ENSG00000071655.18	ENSG00000071655.18:s:1578335-1578538	-0.0007;0.0007	3.521e-04;3.521e-04	7.369e-01;7.369e-01	0.0357;0.9643	0.0257;0.9743	s|1e1.1o1|i	2	2	0;0	chr19	-	1578158-1578335;1578159-1578334	1573596-1578158;1578335-1578538	1578159-1578334
158	DERL2	ENSG00000072849.11	ENSG00000072849.11:t:5480387-5480459	-0.0005;0.0005	2.481e-06;2.481e-06	9.536e-01;9.536e-01	0.0147;0.9853	0.0068;0.9932	t|1e1.1o1|i	2	2	0;0	chr17	-	5480459-5481101;5480460-5480509	5480387-5480459;5481101-5481142	5480460-5480509
159	RABL2B	ENSG00000079974.19	ENSG00000079974.19:s:50768760-50768874	-0.0004;0.0004	9.322e-05;9.322e-05	8.181e-01;8.181e-01	0.0250;0.9750	0.0217;0.9783	s|1e1.1o1|i	2	2	0;0	chr22	-	50767708-50768760;50767709-50768759	50767501-50767708;50768760-50768874	50767709-50768759
160	HSP90AA1	ENSG00000080824.19	ENSG00000080824.19:s:102084681-102084798	0.0002;-0.0002	2.815e-04;2.815e-04	7.508e-01;7.508e-01	0.0270;0.9730	0.0323;0.9677	s|1e1.1o1|i	2	2	0;0	chr14	-	102084564-102084681;102084565-102084680	102084399-102084564;102084681-102084798	102084565-102084680
161	HSP90AA1	ENSG00000080824.19	ENSG00000080824.19:s:102086217-102086378	-0.0003;-0.0003;0.0008	5.049e-05;5.049e-05;2.032e-04	8.866e-01;8.866e-01;7.471e-01	0.0175;0.0175;0.9649	0.0123;0.0123;0.9753	s|1e1.1o1|1e2.1o1|i	3	3	0;0;0	chr14	-	102086124-102086217;102085431-102086217;102086125-102086216	102085298-102085707;102085758-102086124;102086217-102086378	102086125-102086216
162	ZNF213	ENSG00000085644.14	ENSG00000085644.14:s:3140689-3142353	-0.0003;0.0003	2.906e-06;2.906e-06	9.391e-01;9.391e-01	0.0152;0.9848	0.0104;0.9896	s|1e1.1o1|i	2	2	0;0	chr16	+	3142353-3142464;3142354-3142463	3140689-3142353;3142464-3142804	3142354-3142463
163	ADA2	ENSG00000093072.19	ENSG00000093072.19:s:17181087-17181576	-0.0002;-0.0002;-0.0002;0.0007	1.957e-04;1.957e-04;1.957e-04;1.621e-03	8.390e-01;8.390e-01;8.390e-01;5.387e-01	0.0192;0.0192;0.0192;0.9423	0.0167;0.0167;0.0167;0.9500	s|1e1.1o2|1e1.2o2|1e2.1o1|i	4	3	0;0;0;0	chr22	-	17180486-17181487;17179760-17181487;17179278-17181487;17180487-17181086	17178790-17179278;17179301-17180486;17181087-17181576	17180487-17181086
164	ATP5F1D	ENSG00000099624.8	ENSG00000099624.8:s:1244315-1244440	-0.0001;-0.0001;0.0001	4.422e-08;4.422e-08;2.054e-07	9.853e-01;9.853e-01;9.570e-01	0.0070;0.0070;0.9860	0.0061;0.0061;0.9879	s|1e1.1o2|1e1.2o2|i	3	2	0;0;0	chr19	+	1244440-1244691;1244440-1244737;1244441-1244690	1244315-1244440;1244691-1244825	1244441-1244690
165	POLR2E	ENSG00000099817.12	ENSG00000099817.12:t:1086574-1086988	0.0002;0.0002;-0.0007	4.322e-04;4.322e-04;1.797e-03	7.783e-01;7.783e-01;5.629e-01	0.0222;0.0222;0.9556	0.0267;0.0267;0.9466	t|1e1.2o2|1e2.1o1|i	3	3	0;0;0	chr19	-	1086988-1089472;1086988-1088066;1086989-1087644	1086574-1086988;1087645-1088166;1089472-1089573	1086989-1087644
166	SLC35F5	ENSG00000115084.15	ENSG00000115084.15:s:113715158-113715195	0.0000;-0.0000	2.377e-04;2.377e-04	7.654e-01;7.654e-01	0.0263;0.9737	0.0278;0.9722	s|1e1.1o1|i	2	2	0;0	chr2	-	113715041-113715158;113715042-113715157	113706709-113715041;113715158-113715195	113715042-113715157
167	MIIP	ENSG00000116691.11	ENSG00000116691.11:s:12029223-12029607	-0.0001;0.0001	1.189e-03;1.189e-03	6.267e-01;6.267e-01	0.0385;0.9615	0.0455;0.9545	s|1e1.1o1|i	2	2	0;0	chr1	+	12029281-12029765;12029608-12029764	12029223-12029607;12029765-12029894	12029608-12029764
168	MIIP	ENSG00000116691.11	ENSG00000116691.11:s:12029765-12029894	-0.0007;0.0007	5.785e-04;5.785e-04	6.983e-01;6.983e-01	0.0401;0.9599	0.0278;0.9722	s|1e1.1o1|i	2	2	0;0	chr1	+	12029894-12030028;12029895-12030027	12029765-12029894;12030028-12030124	12029895-12030027
169	STMN1	ENSG00000117632.23	ENSG00000117632.23:s:25903641-25903813	-0.0002;0.0002	7.796e-06;7.796e-06	9.132e-01;9.132e-01	0.0161;0.9839	0.0139;0.9861	s|1e1.1o1|i	2	2	0;0	chr1	-	25901682-25903641;25901683-25903640	25901407-25901682;25903641-25903813	25901683-25903640
170	KMT2A	ENSG00000118058.24	ENSG00000118058.24:t:118474179-118474315	-0.0000;-0.0000;0.0001	1.566e-10;1.566e-10;1.182e-09	9.973e-01;9.973e-01;9.912e-01	0.0047;0.0047;0.9905	0.0035;0.0035;0.9931	t|1e1.1o1|1e2.1o1|i	3	3	0;0;0	chr11	+	118468844-118474179;118471985-118474179;118471986-118474178	118467551-118469103;118471662-118471985;118474179-118474315	118471986-118474178
171	ZNF426	ENSG00000130818.12	ENSG00000130818.12:s:9538575-9538645	-0.0003;0.0003	6.137e-04;6.137e-04	6.802e-01;6.802e-01	0.0385;0.9615	0.0357;0.9643	s|1e1.1o1|i	2	2	0;0	chr19	-	9538345-9538575;9538389-9538574	9538259-9538388;9538575-9538645	9538389-9538574
172	JAG1	ENSG00000101384.12	ENSG00000101384.12:s:10639472-10639955	-0.0003;0.0003	2.129e-05;2.129e-05	8.854e-01;8.854e-01	0.0192;0.9808	0.0164;0.9836	s|1e1.1o1|i	2	2	0;0	chr20	-	10637967-10639472;10637968-10639471	10637684-10637967;10639472-10639955	10637968-10639471
173	BIRC2	ENSG00000110330.10	ENSG00000110330.10:s:102348598-102349013	-0.0001;-0.0001;-0.0001;0.0004	3.342e-07;3.342e-07;3.342e-07;3.145e-06	9.845e-01;9.845e-01;9.845e-01;9.234e-01	0.0062;0.0062;0.0062;0.9815	0.0048;0.0048;0.0048;0.9857	s|1e2.1o1|2e1.1o2|2e1.2o2|i	4	3	0;0;0;0	chr11	+	102348719-102350346;102348764-102349878;102348764-102350001;102349014-102349877	102348598-102349013;102349878-102350235;102350346-102350749	102349014-102349877
174	BIRC2	ENSG00000110330.10	ENSG00000110330.10:t:102349878-102350235	-0.0001;-0.0001;-0.0001;-0.0001;0.0004	2.360e-07;2.360e-07;2.360e-07;2.360e-07;3.730e-06	9.884e-01;9.884e-01;9.884e-01;9.884e-01;9.152e-01	0.0049;0.0049;0.0049;0.0049;0.9802	0.0038;0.0038;0.0038;0.0038;0.9848	t|1e1.1o2|1e2.2o2|2e1.1o2|2e2.2o2|i	5	3	0;0;0;0;0	chr11	+	102347376-102349878;102348764-102349878;102347376-102350001;102348764-102350001;102349014-102349877	102347211-102347845;102348598-102349013;102349878-102350235	102349014-102349877
175	BIRC2	ENSG00000110330.10	ENSG00000110330.10:t:102350346-102350749	-0.0001;0.0001	6.626e-08;6.635e-08	9.817e-01;9.817e-01	0.0100;0.9900	0.0070;0.9930	t|1e1.1o2|i	2	2	0;0	chr11	+	102348719-102350346;102350236-102350345	102348598-102349013;102350346-102350749	102350236-102350345
176	SLC1A2	ENSG00000110436.13	ENSG00000110436.13:t:35251205-35254808	-0.0000;-0.0000;0.0000	2.253e-21;2.253e-21;1.365e-10	9.983e-01;9.983e-01;9.941e-01	0.0042;0.0042;0.9916	0.0033;0.0033;0.9934	t|1e1.1o1|1e2.1o1|i	3	3	0;0;0	chr11	-	35254808-35265527;35254808-35260844;35254809-35256951	35251205-35254808;35256952-35260965;35264830-35265758	35254809-35256951
177	SLC1A2	ENSG00000110436.13	ENSG00000110436.13:t:35418950-35419286	0.0001;0.0001;0.0001;-0.0004	1.630e-05;1.630e-05;1.630e-05;1.417e-04	9.349e-01;9.349e-01;9.349e-01;7.561e-01	0.0091;0.0091;0.0091;0.9727	0.0114;0.0114;0.0114;0.9659	t|1e1.3o3|1e2.1o1|1e3.1o1|i	4	4	0;0;0;0	chr11	-	35419007-35419908;35419007-35419782;35419007-35419326;35419287-35419325	35418950-35419286;35419326-35419558;35419782-35419899;35419908-35420063	35419287-35419325
178	C11orf58	ENSG00000110696.10	ENSG00000110696.10:s:16756025-16756364	0.0000;-0.0000	3.394e-04;3.394e-04	7.321e-01;7.321e-01	0.0294;0.9706	0.0323;0.9677	s|1e1.1o1|i	2	2	0;0	chr11	+	16756364-16756816;16756365-16756815	16756025-16756364;16756816-16758340	16756365-16756815
179	LMNB1	ENSG00000113368.12	ENSG00000113368.12:s:126776623-126777252	-0.0000;-0.0000;-0.0000;0.0001	5.209e-11;5.209e-11;5.209e-11;8.994e-10	9.988e-01;9.988e-01;9.988e-01;9.922e-01	0.0032;0.0032;0.0032;0.9903	0.0020;0.0020;0.0020;0.9939	s|1e2.1o1|2e1.1o1|2e2.1o1|i	4	3	0;0;0;0	chr5	+	126777244-126804776;126777252-126777361;126777252-126804776;126777253-126777360	126776623-126777252;126777361-126777406;126804776-126804932	126777253-126777360
180	LMNB1	ENSG00000113368.12	ENSG00000113368.12:s:126777361-126777406	-0.0000;0.0000	2.250e-21;2.392e-12	9.990e-01;9.990e-01	0.0050;0.9950	0.0036;0.9964	s|1e1.1o1|i	2	2	0;0	chr5	+	126777406-126777698;126777407-126777697	126777361-126777406;126777698-126777867	126777407-126777697
181	RPS15	ENSG00000115268.10	ENSG00000115268.10:s:1438358-1438580	0.0002;0.0002;0.0002;-0.0007	1.642e-04;1.642e-04;1.642e-04;1.375e-03	8.521e-01;8.521e-01;8.521e-01;5.616e-01	0.0147;0.0147;0.0147;0.9559	0.0208;0.0208;0.0208;0.9375	s|1e1.1o2|1e1.2o2|2e1.1o2|i	4	2	0;0;0;0	chr19	+	1438428-1438807;1438428-1438811;1438580-1438807;1438581-1438806	1438358-1438580;1438807-1438892	1438581-1438806
182	MOGS	ENSG00000115275.15	ENSG00000115275.15:s:74461934-74462180	-0.0001;0.0001	2.091e-05;2.091e-05	8.822e-01;8.822e-01	0.0182;0.9818	0.0179;0.9821	s|1e1.1o1|i	2	2	0;0	chr2	-	74461639-74461934;74461640-74461933	74461057-74461639;74461934-74462180	74461640-74461933
183	MOGS	ENSG00000115275.15	ENSG00000115275.15:s:74462961-74463012	-0.0002;-0.0002;0.0005	2.540e-06;2.540e-06;1.075e-05	9.584e-01;9.584e-01;8.916e-01	0.0106;0.0106;0.9788	0.0078;0.0078;0.9843	s|1e1.1o1|1e2.1o1|i	3	3	0;0;0	chr2	-	74462773-74462961;74462180-74462961;74462835-74462960	74461934-74462180;74462279-74462773;74462961-74463012	74462835-74462960
184	MOGS	ENSG00000115275.15	ENSG00000115275.15:s:74463380-74463646	-0.0003;-0.0003;0.0008	1.985e-05;1.985e-05;8.091e-05	9.218e-01;9.218e-01;8.136e-01	0.0145;0.0145;0.9710	0.0103;0.0103;0.9795	s|1e1.2o2|1e2.1o1|i	3	3	0;0;0	chr2	-	74463219-74463380;74463012-74463380;74463332-74463379	74462961-74463012;74463190-74463331;74463380-74463646	74463332-74463379
185	MOGS	ENSG00000115275.15	ENSG00000115275.15:t:74461934-74462180	-0.0004;0.0004	1.389e-05;1.389e-05	9.021e-01;9.021e-01	0.0185;0.9815	0.0139;0.9861	t|1e1.1o1|i	2	2	0;0	chr2	-	74462180-74462961;74462181-74462278	74461934-74462180;74462961-74463012	74462181-74462278
186	MOGS	ENSG00000115275.15	ENSG00000115275.15:t:74462794-74462834	-0.0003;0.0003	5.593e-06;5.593e-06	9.277e-01;9.277e-01	0.0159;0.9841	0.0118;0.9882	t|1e1.1o1|i	2	2	0;0	chr2	-	74462834-74463190;74462835-74462960	74462794-74462834;74463190-74463331	74462835-74462960
187	MOGS	ENSG00000115275.15	ENSG00000115275.15:t:74463190-74463331	-0.0001;-0.0001;-0.0001;-0.0001;-0.0001;0.0011	6.760e-06;6.760e-06;6.760e-06;6.760e-06;6.760e-06;1.406e-04	9.658e-01;9.658e-01;9.658e-01;9.658e-01;9.658e-01;7.553e-01	0.0072;0.0072;0.0072;0.0072;0.0072;0.9638	0.0051;0.0051;0.0051;0.0051;0.0051;0.9744	t|1e1.1o1|1e2.1o1|1e3.1o2|1e3.2o2|2e4.1o1|i	6	5	0;0;0;0;0;0	chr2	-	74463331-74465314;74463331-74464896;74463331-74464666;74463331-74464496;74463219-74463380;74463332-74463379	74463190-74463331;74463380-74463646;74464417-74464722;74464896-74464987;74465314-74465410	74463332-74463379
188	MOGS	ENSG00000115275.15	ENSG00000115275.15:t:74464896-74464987	-0.0002;-0.0002;0.0004	6.666e-05;6.666e-05;2.663e-04	8.723e-01;8.723e-01;7.222e-01	0.0175;0.0175;0.9649	0.0152;0.0152;0.9697	t|1e1.1o1|1e2.1o1|i	3	3	0;0;0	chr2	-	74464987-74465314;74464987-74465082;74464988-74465081	74464896-74464987;74465082-74465294;74465314-74465410	74464988-74465081
189	PARP2	ENSG00000129484.14	ENSG00000129484.14:t:20357638-20357904	-0.0001;-0.0001;0.0002	2.670e-04;2.670e-04;1.050e-03	7.916e-01;7.916e-01;5.939e-01	0.0238;0.0238;0.9524	0.0247;0.0247;0.9505	t|1e1.1o1|1e2.1o1|i	3	3	0;0;0	chr14	+	20357149-20357638;20357520-20357638;20357521-20357637	20357051-20357149;20357396-20357520;20357638-20357904	20357521-20357637
190	KCNK2	ENSG00000082482.14	ENSG00000082482.14:s:215234828-215235219	-0.0003;0.0003	6.620e-06;6.620e-06	9.153e-01;9.153e-01	0.0185;0.9815	0.0132;0.9868	s|1e1.1o1|i	2	2	0;0	chr1	+	215235179-215235691;215235220-215235690	215234828-215235219;215235691-215237090	215235220-215235690
191	REST	ENSG00000084093.19	ENSG00000084093.19:s:56910630-56911089	-0.0001;-0.0001;0.0003	2.157e-05;2.157e-05;8.790e-05	9.113e-01;9.113e-01;7.938e-01	0.0136;0.0136;0.9728	0.0131;0.0131;0.9738	s|1e1.1o1|2e2.1o1|i	3	3	0;0;0	chr4	+	56910939-56911336;56911089-56919787;56911090-56911335	56910630-56911089;56911336-56911536;56919787-56919870	56911090-56911335
192	ATRX	ENSG00000085224.23	ENSG00000085224.23:s:77683507-77684593	-0.0001;0.0001	1.143e-07;1.144e-07	9.755e-01;9.755e-01	0.0102;0.9898	0.0084;0.9916	s|1e1.1o1|i	2	2	0;0	chrX	-	77683451-77683539;77683452-77683506	77682305-77683451;77683507-77684593	77683452-77683506
193	POMGNT1	ENSG00000085998.15	ENSG00000085998.15:t:46188683-46188980	-0.0002;-0.0002;-0.0002;0.0009	1.349e-05;1.349e-05;1.349e-05;1.170e-04	9.449e-01;9.449e-01;9.449e-01;7.842e-01	0.0100;0.0100;0.0100;0.9700	0.0075;0.0075;0.0075;0.9776	t|1e1.2o2|1e2.1o2|1e2.2o2|i	4	3	0;0;0;0	chr1	-	46188980-46189458;46188980-46189242;46188980-46189180;46188981-46189179	46188683-46188980;46189180-46189357;46189458-46189823	46188981-46189179
194	UIMC1	ENSG00000087206.17	ENSG00000087206.17:s:176969053-176969291	-0.0000;0.0000	1.652e-04;1.652e-04	7.956e-01;7.956e-01	0.0257;0.9743	0.0251;0.9749	s|1e1.1o1|i	2	2	0;0	chr5	-	176958154-176969053;176968890-176969052	176958093-176958154;176969053-176969291	176968890-176969052
195	ACO2	ENSG00000100412.17	ENSG00000100412.17:s:41525193-41525348	-0.0005;-0.0005;0.0012	2.410e-04;2.410e-04;9.562e-04	8.105e-01;8.105e-01;6.196e-01	0.0247;0.0247;0.9505	0.0167;0.0167;0.9667	s|1e1.1o1|1e2.1o1|i	3	3	0;0;0	chr22	+	41525348-41526262;41525348-41527288;41525349-41526261	41525193-41525348;41526262-41526453;41527288-41527420	41525349-41526261
196	ACO2	ENSG00000100412.17	ENSG00000100412.17:s:41527288-41527420	-0.0004;0.0004	3.607e-05;3.607e-05	8.676e-01;8.676e-01	0.0208;0.9792	0.0167;0.9833	s|1e1.1o1|i	2	2	0;0	chr22	+	41527420-41527901;41527421-41527900	41527288-41527420;41527901-41528022	41527421-41527900
197	DDHD1	ENSG00000100523.16	ENSG00000100523.16:s:53152706-53153323	-0.0002;0.0002	1.453e-05;1.453e-05	8.959e-01;8.959e-01	0.0179;0.9821	0.0152;0.9848	s|1e1.1o1|i	2	2	0;0	chr14	-	53152318-53152706;53152616-53152705	53152261-53152615;53152706-53153323	53152616-53152705
198	AHSA1	ENSG00000100591.8	ENSG00000100591.8:t:77469077-77469472	-0.0002;-0.0002;-0.0002;-0.0002;0.0013	1.593e-05;1.593e-05;1.593e-05;1.593e-05;2.267e-04	9.450e-01;9.450e-01;9.450e-01;9.450e-01;7.190e-01	0.0105;0.0105;0.0105;0.0105;0.9579	0.0067;0.0067;0.0067;0.0067;0.9733	t|1e1.1o1|1e2.1o1|1e3.1o1|1e4.1o1|i	5	5	0;0;0;0;0	chr14	+	77462759-77469077;77468184-77469077;77468508-77469077;77468985-77469077;77468986-77469076	77462642-77463101;77468083-77468319;77468457-77468508;77468796-77468985;77469077-77469472	77468986-77469076
199	R3HCC1	ENSG00000104679.12	ENSG00000104679.12:s:23289866-23289925	-0.0003;0.0003	1.054e-06;1.054e-06	9.626e-01;9.626e-01	0.0128;0.9872	0.0078;0.9922	s|1e1.1o1|i	2	2	0;0	chr8	+	23289925-23290052;23289926-23290051	23289866-23289925;23290052-23290288	23289926-23290051
200	R3HCC1	ENSG00000104679.12	ENSG00000104679.12:s:23290052-23290288	-0.0001;0.0001	8.004e-09;8.008e-09	9.898e-01;9.898e-01	0.0083;0.9917	0.0058;0.9942	s|1e1.1o1|i	2	2	0;0	chr8	+	23290219-23290335;23290289-23290334	23290052-23290288;23290335-23290469	23290289-23290334
201	CAPRIN2	ENSG00000110888.19	ENSG00000110888.19:t:30753344-30753659	0.0000;0.0000;0.0000;0.0000;0.0000;0.0000;0.0000;0.0000;-0.0006	5.029e-05;5.029e-05;5.029e-05;5.029e-05;5.029e-05;5.029e-05;5.029e-05;5.029e-05;1.952e-03	9.371e-01;9.371e-01;9.371e-01;9.371e-01;9.371e-01;9.371e-01;9.371e-01;9.371e-01;5.005e-01	0.0069;0.0069;0.0069;0.0069;0.0069;0.0069;0.0069;0.0069;0.9444	0.0085;0.0085;0.0085;0.0085;0.0085;0.0085;0.0085;0.0085;0.9316	t|1e2.3o4|2e2.1o4|2e2.3o4|2e2.4o4|2e3.1o2|2e4.1o1|3e2.4o4|4e1.1o1|i	9	5	0;0;0;0;0;0;0;0;0	chr12	-	30753609-30754689;30753559-30754751;30753559-30754689;30753559-30754681;30753559-30754439;30753559-30754080;30753549-30754681;30753538-30754889;30753660-30754079	30753344-30753659;30754080-30754311;30754335-30754579;30754681-30754888;30754889-30754955	30753660-30754079
202	RO60	ENSG00000116747.13	ENSG00000116747.13:s:193069016-193069181	-0.0001;0.0001	3.197e-08;3.203e-08	9.851e-01;9.851e-01	0.0092;0.9908	0.0067;0.9933	s|1e1.1o1|i	2	2	0;0	chr1	+	193069181-193075820;193069182-193069231	193069016-193069181;193075820-193076040	193069182-193069231
203	RO60	ENSG00000116747.13	ENSG00000116747.13:s:193084579-193084866	-0.0000;-0.0000;-0.0000;0.0002	7.969e-09;7.969e-09;7.969e-09;8.376e-08	9.970e-01;9.970e-01;9.970e-01;9.823e-01	0.0038;0.0038;0.0038;0.9886	0.0021;0.0021;0.0021;0.9936	s|1e1.1o1|1e2.1o1|2e2.1o1|i	4	3	0;0;0;0	chr1	+	193084657-193084989;193084657-193091651;193084698-193091651;193084867-193084988	193084579-193084866;193084989-193091219;193091651-193091777	193084867-193084988
204	PPDPF	ENSG00000125534.10	ENSG00000125534.10:s:63521512-63521589	-0.0002;0.0002	2.239e-06;2.239e-06	9.404e-01;9.404e-01	0.0145;0.9855	0.0115;0.9885	s|1e1.1o1|i	2	2	0;0	chr20	+	63521589-63521668;63521590-63521667	63521512-63521589;63521668-63522206	63521590-63521667
205	PPDPF	ENSG00000125534.10	ENSG00000125534.10:t:63521512-63521589	-0.0000;-0.0000;0.0001	1.865e-05;1.865e-05;7.630e-05	9.135e-01;9.135e-01;7.980e-01	0.0133;0.0133;0.9733	0.0133;0.0133;0.9733	t|1e1.1o1|1e2.1o1|i	3	3	0;0;0	chr20	+	63520894-63521512;63521363-63521512;63521364-63521511	63520765-63520894;63521284-63521363;63521512-63521589	63521364-63521511
206	KLC1	ENSG00000126214.22	ENSG00000126214.22:s:103684777-103685316	-0.0001;-0.0001;0.0004	3.317e-07;3.317e-07;1.464e-06	9.787e-01;9.787e-01;9.402e-01	0.0082;0.0082;0.9835	0.0058;0.0058;0.9884	s|1e1.1o1|1e2.1o1|i	3	3	0;0;0	chr14	+	103685036-103685638;103685036-103687081;103685317-103685637	103684777-103685316;103685638-103686211;103687081-103687211	103685317-103685637
207	KLC1	ENSG00000126214.22	ENSG00000126214.22:t:103685638-103686211	-0.0001;-0.0001;0.0004	3.317e-07;3.317e-07;1.464e-06	9.787e-01;9.787e-01;9.402e-01	0.0082;0.0082;0.9835	0.0058;0.0058;0.9884	t|1e1.2o2|1e2.1o1|i	3	3	0;0;0	chr14	+	103679545-103685638;103685036-103685638;103685317-103685637	103679309-103679798;103684777-103685316;103685638-103686211	103685317-103685637
208	KIF3C	ENSG00000084731.15	ENSG00000084731.15:s:25982388-25982749	-0.0000;0.0000	5.225e-11;6.988e-11	9.974e-01;9.974e-01	0.0062;0.9938	0.0034;0.9966	s|1e1.1o1|i	2	2	0;0	chr2	-	25982128-25982388;25982129-25982387	25980373-25982128;25982388-25982749	25982129-25982387
209	FKBP1A	ENSG00000088832.18	ENSG00000088832.18:s:1372076-1372240	-0.0001;-0.0001;0.0002	5.129e-04;5.129e-04;2.023e-03	7.478e-01;7.478e-01;5.302e-01	0.0278;0.0278;0.9444	0.0256;0.0256;0.9487	s|1e1.1o1|1e2.1o1|i	3	3	0;0;0	chr20	-	1371147-1372076;1370072-1372076;1371148-1372075	1368977-1370072;1371022-1371147;1372076-1372240	1371148-1372075
210	FKBP1A	ENSG00000088832.18	ENSG00000088832.18:t:1368977-1370072	-0.0000;-0.0000;-0.0000;0.0001	3.495e-04;3.495e-04;3.495e-04;2.885e-03	8.026e-01;8.026e-01;8.026e-01;4.742e-01	0.0208;0.0208;0.0208;0.9375	0.0208;0.0208;0.0208;0.9375	t|1e1.1o1|1e2.1o2|1e2.2o2|i	4	3	0;0;0;0	chr20	-	1370072-1372076;1370072-1371120;1370072-1371022;1370073-1371021	1368977-1370072;1371022-1371147;1372076-1372240	1370073-1371021
211	KDM2B	ENSG00000089094.20	ENSG00000089094.20:s:121430277-121430469	-0.0001;-0.0001;0.0002	4.181e-05;4.181e-05;1.682e-04	8.884e-01;8.884e-01;7.512e-01	0.0148;0.0148;0.9704	0.0148;0.0148;0.9704	s|1e1.1o1|2e1.1o1|i	3	2	0;0;0	chr12	-	121430163-121430342;121430163-121430277;121430164-121430276	121429096-121430163;121430277-121430469	121430164-121430276
212	MSH2	ENSG00000095002.15	ENSG00000095002.15:s:47403067-47403175	-0.0004;0.0004	5.492e-06;5.492e-06	9.356e-01;9.356e-01	0.0156;0.9844	0.0102;0.9898	s|1e1.1o1|i	2	2	0;0	chr2	+	47403175-47403360;47403176-47403359	47403067-47403175;47403360-47403402	47403176-47403359
213	CIRBP	ENSG00000099622.14	ENSG00000099622.14:s:1271551-1271639	-0.0008;0.0008	8.097e-04;8.097e-04	6.675e-01;6.675e-01	0.0417;0.9583	0.0292;0.9708	s|1e1.1o1|i	2	2	0;0	chr19	+	1271632-1271981;1271640-1271980	1271551-1271639;1271981-1272374	1271640-1271980
214	CIRBP	ENSG00000099622.14	ENSG00000099622.14:s:1271981-1272374	-0.0001;-0.0001;-0.0001;-0.0001;0.0004	2.128e-08;2.128e-08;2.128e-08;2.128e-08;3.805e-07	9.948e-01;9.948e-01;9.948e-01;9.948e-01;9.572e-01	0.0043;0.0043;0.0043;0.0043;0.9830	0.0023;0.0023;0.0023;0.0023;0.9908	s|1e1.1o1|1e2.1o2|1e2.2o2|1e3.1o2|i	5	4	0;0;0;0;0	chr19	+	1272051-1272427;1272051-1273494;1272051-1273601;1272051-1274307;1272375-1272426	1271981-1272374;1272427-1272803;1273494-1273715;1274307-1274595	1272375-1272426
215	CIRBP	ENSG00000099622.14	ENSG00000099622.14:s:1272917-1273172	-0.0002;0.0002	4.588e-07;4.589e-07	9.645e-01;9.645e-01	0.0122;0.9878	0.0088;0.9912	s|1e1.2o2|i	2	2	0;0	chr19	+	1273025-1274351;1273173-1273493	1272917-1273172;1274307-1274595	1273173-1273493
216	CIRBP	ENSG00000099622.14	ENSG00000099622.14:s:1274307-1274595	-0.0001;-0.0001;-0.0001;0.0003	8.222e-08;8.222e-08;8.222e-08;8.338e-07	9.889e-01;9.889e-01;9.889e-01;9.423e-01	0.0058;0.0058;0.0058;0.9827	0.0042;0.0042;0.0042;0.9875	s|1e1.1o2|1e1.2o2|2e1.1o2|i	4	2	0;0;0;0	chr19	+	1274440-1274649;1274440-1274652;1274444-1274649;1274596-1274648	1274307-1274595;1274649-1274880	1274596-1274648
217	CIRBP	ENSG00000099622.14	ENSG00000099622.14:t:1270928-1271029	-0.0000;-0.0000;-0.0000;-0.0000;-0.0000;-0.0000;-0.0000;-0.0000;-0.0000;-0.0000;-0.0000;0.0006	2.326e-08;2.326e-08;2.326e-08;2.326e-08;2.326e-08;2.326e-08;2.326e-08;2.326e-08;2.326e-08;2.326e-08;2.326e-08;1.924e-06	9.974e-01;9.974e-01;9.974e-01;9.974e-01;9.974e-01;9.974e-01;9.974e-01;9.974e-01;9.974e-01;9.974e-01;9.974e-01;9.269e-01	0.0018;0.0018;0.0018;0.0018;0.0018;0.0018;0.0018;0.0018;0.0018;0.0018;0.0018;0.9800	0.0010;0.0010;0.0010;0.0010;0.0010;0.0010;0.0010;0.0010;0.0010;0.0010;0.0010;0.9889	t|1e1.1o1|1e2.1o2|1e3.1o1|1e4.1o1|1e5.1o1|1e6.1o1|1e7.1o1|1e8.1o1|1e9.2o2|1e10.1o1|1e11.1o1|i	12	12	0;0;0;0;0;0;0;0;0;0;0;0	chr19	+	1259638-1270928;1261453-1270928;1264463-1270928;1266701-1270928;1267165-1270928;1267292-1270928;1267366-1270928;1267443-1270928;1269410-1270928;1269915-1270928;1270882-1270928;1270883-1270927	1259384-1259638;1261156-1261641;1264253-1264698;1266653-1266701;1266798-1267165;1267229-1267292;1267339-1267366;1267412-1267443;1269266-1269410;1269912-1269915;1270867-1270882;1270928-1271029	1270883-1270927
218	CIRBP	ENSG00000099622.14	ENSG00000099622.14:t:1271329-1271467	0.0001;0.0001;-0.0002	1.075e-04;1.075e-04;4.286e-04	8.535e-01;8.535e-01;6.894e-01	0.0159;0.0159;0.9683	0.0196;0.0196;0.9608	t|1e1.1o1|1e2.1o1|i	3	3	0;0;0	chr19	+	1271036-1271329;1271246-1271329;1271247-1271328	1271030-1271036;1271121-1271246;1271329-1271467	1271247-1271328
219	CIRBP	ENSG00000099622.14	ENSG00000099622.14:t:1272917-1273172	-0.0000;0.0000	2.247e-21;1.776e-15	9.999e-01;9.999e-01	0.0035;0.9965	0.0025;0.9975	t|1e1.1o3|i	2	2	0;0	chr19	+	1271361-1272969;1272804-1272916	1271329-1271467;1272917-1273172	1272804-1272916
220	CIRBP	ENSG00000099622.14	ENSG00000099622.14:t:1273494-1273715	-0.0001;-0.0001;0.0003	2.024e-07;2.024e-07;9.059e-07	9.804e-01;9.804e-01;9.444e-01	0.0081;0.0081;0.9837	0.0058;0.0058;0.9883	t|1e1.1o1|2e1.1o1|i	3	2	0;0;0	chr19	+	1272051-1273494;1272051-1273601;1273173-1273493	1271981-1272374;1273494-1273715	1273173-1273493
221	CIRBP	ENSG00000099622.14	ENSG00000099622.14:t:1274307-1274595	-0.0000;-0.0000;-0.0000;0.0002	2.399e-08;2.399e-08;2.399e-08;2.540e-07	9.913e-01;9.913e-01;9.913e-01;9.531e-01	0.0051;0.0051;0.0051;0.9847	0.0043;0.0043;0.0043;0.9871	t|1e1.1o1|1e3.1o1|2e2.1o1|i	4	4	0;0;0;0	chr19	+	1272051-1274307;1273715-1274307;1273025-1274351;1273716-1274306	1271981-1272374;1272917-1273172;1273494-1273715;1274307-1274595	1273716-1274306
222	HNRNPM	ENSG00000099783.12	ENSG00000099783.12:s:8465324-8465372	0.0000;0.0000;-0.0000	2.248e-21;2.248e-21;1.116e-12	9.997e-01;9.997e-01;9.988e-01	0.0028;0.0028;0.9944	0.0027;0.0027;0.9945	s|1e1.1o1|1e2.1o1|i	3	3	0;0;0	chr19	+	8465362-8465480;8465362-8466235;8465373-8465479	8465324-8465372;8465480-8465515;8466235-8466388	8465373-8465479
223	JOSD1	ENSG00000100221.11	ENSG00000100221.11:t:38699801-38700123	-0.0001;-0.0001;-0.0001;0.0005	4.504e-07;4.504e-07;4.504e-07;4.257e-06	9.833e-01;9.833e-01;9.833e-01;9.185e-01	0.0068;0.0068;0.0068;0.9797	0.0044;0.0044;0.0044;0.9868	t|1e1.1o1|1e2.1o1|1e3.2o3|i	4	4	0;0;0;0	chr22	-	38700123-38701257;38700123-38700966;38700123-38700862;38700124-38700160	38699801-38700123;38700800-38700943;38700966-38701032;38701257-38701556	38700124-38700160
224	ERCC2	ENSG00000104884.17	ENSG00000104884.17:s:45351468-45351721	-0.0008;0.0008	7.285e-04;7.285e-04	6.803e-01;6.803e-01	0.0417;0.9583	0.0303;0.9697	s|1e1.1o1|i	2	2	0;0	chr19	-	45351030-45351468;45351031-45351467	45349837-45351030;45351468-45351721	45351031-45351467
225	NDRG4	ENSG00000103034.15	ENSG00000103034.15:s:58500047-58500269	-0.0000;-0.0000;-0.0000;-0.0000;-0.0000;-0.0000;0.0002	8.141e-05;8.141e-05;8.141e-05;8.141e-05;8.141e-05;8.141e-05;2.072e-03	9.121e-01;9.121e-01;9.121e-01;9.121e-01;9.121e-01;9.121e-01;4.958e-01	0.0102;0.0102;0.0102;0.0102;0.0102;0.0102;0.9388	0.0110;0.0110;0.0110;0.0110;0.0110;0.0110;0.9341	s|1e1.1o1|1e2.1o3|1e2.2o3|1e3.1o3|1e3.2o3|1e3.3o3|i	7	4	0;0;0;0;0;0;0	chr16	+	58500269-58500988;58500269-58501945;58500269-58501948;58500269-58503706;58500269-58503744;58500269-58503798;58500270-58500987	58500047-58500269;58500988-58501395;58501945-58502147;58503706-58503957	58500270-58500987
226	NDRG4	ENSG00000103034.15	ENSG00000103034.15:s:58503706-58503957	-0.0000;-0.0000;-0.0000;0.0001	2.128e-04;2.128e-04;2.128e-04;1.756e-03	8.335e-01;8.335e-01;8.335e-01;5.289e-01	0.0192;0.0192;0.0192;0.9423	0.0200;0.0200;0.0200;0.9399	s|1e1.1o2|1e1.2o2|2e1.1o2|i	4	2	0;0;0;0	chr16	+	58503903-58504154;58503903-58504189;58503957-58504154;58503958-58504153	58503706-58503957;58504154-58504277	58503958-58504153
227	NDRG4	ENSG00000103034.15	ENSG00000103034.15:t:58500988-58501395	-0.0001;-0.0001;0.0001	2.924e-04;2.924e-04;1.155e-03	7.870e-01;7.870e-01;5.867e-01	0.0238;0.0238;0.9524	0.0256;0.0256;0.9487	t|1e1.1o1|1e2.1o1|i	3	3	0;0;0	chr16	+	58495008-58500988;58500269-58500988;58500270-58500987	58494964-58495008;58500047-58500269;58500988-58501395	58500270-58500987
228	NDRG4	ENSG00000103034.15	ENSG00000103034.15:t:58511508-58511932	-0.0001;0.0001	1.219e-08;1.227e-08	9.897e-01;9.897e-01	0.0085;0.9915	0.0056;0.9944	t|1e1.1o1|i	2	2	0;0	chr16	+	58507015-58511508;58511461-58511507	58506980-58507197;58511508-58511932	58511461-58511507
229	NDRG4	ENSG00000103034.15	ENSG00000103034.15:t:58512101-58513628	-0.0001;0.0001	7.772e-09;7.778e-09	9.914e-01;9.914e-01	0.0078;0.9922	0.0050;0.9950	t|1e1.1o1|i	2	2	0;0	chr16	+	58507015-58512101;58511933-58512100	58506980-58507197;58512101-58513628	58511933-58512100
230	HSPB1	ENSG00000106211.10	ENSG00000106211.10:s:76303698-76303727	-0.0016;0.0016	4.328e-04;4.328e-04	7.521e-01;7.521e-01	0.0385;0.9615	0.0154;0.9846	s|1e1.1o2|i	2	2	0;0	chr7	+	76303727-76303802;76303728-76303761	76303698-76303727;76303802-76303888	76303728-76303761
231	HSPB1	ENSG00000106211.10	ENSG00000106211.10:t:76303762-76303792	-0.0010;-0.0010;0.0024	2.023e-04;2.023e-04;8.107e-04	8.416e-01;8.416e-01;6.638e-01	0.0256;0.0256;0.9487	0.0103;0.0103;0.9795	t|1e1.1o3|2e1.1o3|i	3	2	0;0;0	chr7	+	76303076-76303762;76303076-76303777;76303728-76303761	76302673-76303111;76303762-76303792	76303728-76303761
232	SRSF3	ENSG00000112081.17	ENSG00000112081.17:s:36599438-36600276	0.0002;-0.0002	1.514e-05;1.514e-05	8.969e-01;8.969e-01	0.0156;0.9844	0.0189;0.9811	s|1e1.1o1|i	2	2	0;0	chr6	+	36600276-36601152;36600277-36600402	36599438-36600276;36601152-36601190	36600277-36600402
233	SRSF3	ENSG00000112081.17	ENSG00000112081.17:t:36601152-36601190	0.0001;0.0001;-0.0002	4.900e-05;4.900e-05;1.974e-04	8.806e-01;8.806e-01;7.372e-01	0.0152;0.0152;0.9697	0.0175;0.0175;0.9649	t|1e1.1o1|1e2.1o1|i	3	3	0;0;0	chr6	+	36598983-36601152;36600276-36601152;36600882-36601151	36598849-36598983;36599438-36600276;36601152-36601190	36600882-36601151
234	ATP5PB	ENSG00000116459.11	ENSG00000116459.11:t:111456227-111456249	-0.0003;0.0003	2.183e-06;2.183e-06	9.420e-01;9.420e-01	0.0148;0.9852	0.0106;0.9894	t|1e1.1o1|i	2	2	0;0	chr1	+	111449873-111456227;111456146-111456226	111449682-111449873;111456227-111456249	111456146-111456226
235	SFPQ	ENSG00000116560.12	ENSG00000116560.12:t:35177989-35178136	-0.0000;-0.0000;-0.0000;0.0002	8.531e-09;8.531e-09;8.531e-09;9.280e-08	9.935e-01;9.935e-01;9.935e-01;9.635e-01	0.0047;0.0047;0.0047;0.9858	0.0040;0.0040;0.0040;0.9880	t|1e1.1o1|1e2.1o1|1e3.1o1|i	4	4	0;0;0;0	chr1	-	35178036-35187001;35178036-35181135;35178036-35178665;35178137-35178664	35177989-35178136;35178665-35180645;35181135-35181606;35187001-35187122	35178137-35178664
236	NRP2	ENSG00000118257.17	ENSG00000118257.17:s:205682500-205682578	-0.0000;0.0000	5.277e-06;5.277e-06	9.201e-01;9.201e-01	0.0145;0.9855	0.0149;0.9851	s|1e1.1o1|i	2	2	0;0	chr2	+	205682578-205683091;205682579-205682657	205682500-205682578;205683091-205683363	205682579-205682657
237	NRP2	ENSG00000118257.17	ENSG00000118257.17:t:205683091-205683363	0.0000;0.0000;0.0000;-0.0001	6.454e-06;6.454e-06;6.454e-06;5.771e-05	9.492e-01;9.492e-01;9.492e-01;7.986e-01	0.0086;0.0086;0.0086;0.9741	0.0094;0.0094;0.0094;0.9717	t|1e1.1o1|1e2.1o1|1e3.1o1|i	4	4	0;0;0;0	chr2	+	205682218-205683091;205682578-205683091;205682905-205683091;205682906-205683090	205681990-205682218;205682500-205682578;205682658-205682905;205683091-205683363	205682906-205683090
238	SORBS3	ENSG00000120896.14	ENSG00000120896.14:s:22566661-22566713	-0.0007;0.0007	1.982e-04;1.982e-04	7.811e-01;7.811e-01	0.0294;0.9706	0.0224;0.9776	s|1e1.1o1|i	2	2	0;0	chr8	+	22566713-22566822;22566714-22566821	22566661-22566713;22566822-22566868	22566714-22566821
239	SORBS3	ENSG00000120896.14	ENSG00000120896.14:s:22574667-22574789	-0.0001;0.0001	3.827e-07;3.827e-07	9.635e-01;9.635e-01	0.0119;0.9881	0.0100;0.9900	s|1e1.1o1|i	2	2	0;0	chr8	+	22574724-22574974;22574790-22574973	22574667-22574789;22574974-22575788	22574790-22574973
240	CDK2	ENSG00000123374.11	ENSG00000123374.11:s:55966781-55966865	-0.0004;0.0004	2.581e-05;2.581e-05	8.801e-01;8.801e-01	0.0204;0.9796	0.0161;0.9839	s|1e1.1o1|i	2	2	0;0	chr12	+	55966865-55967027;55966866-55967026	55966781-55966865;55967027-55967124	55966866-55967026
241	STIL	ENSG00000123473.17	ENSG00000123473.17:s:47280946-47281209	-0.0004;0.0004	1.658e-04;1.658e-04	7.916e-01;7.916e-01	0.0270;0.9730	0.0222;0.9778	s|1e1.1o1|i	2	2	0;0	chr1	-	47280363-47280946;47280364-47280945	47280241-47280363;47280946-47281209	47280364-47280945
242	MRPS7	ENSG00000125445.11	ENSG00000125445.11:s:75265702-75266084	-0.0002;-0.0002;0.0005	1.776e-05;1.776e-05;7.246e-05	9.203e-01;9.203e-01;8.112e-01	0.0139;0.0139;0.9722	0.0109;0.0109;0.9783	s|1e1.1o1|2e1.1o1|i	3	2	0;0;0	chr17	+	75265964-75266193;75265966-75266193;75266085-75266192	75265702-75266084;75266193-75266376	75266085-75266192
243	TRIM47	ENSG00000132481.7	ENSG00000132481.7:s:75874711-75875123	-0.0004;0.0004	4.803e-05;4.803e-05	8.556e-01;8.556e-01	0.0227;0.9773	0.0172;0.9828	s|1e1.1o1|i	2	2	0;0	chr17	-	75874576-75874711;75874577-75874710	75874164-75874576;75874711-75875123	75874577-75874710
244	TRIP13	ENSG00000071539.14	ENSG00000071539.14:t:917719-918120	0.0005;-0.0005	8.108e-04;8.108e-04	6.742e-01;6.742e-01	0.0294;0.9706	0.0417;0.9583	t|1e1.1o1|i	2	2	0;0	chr5	+	917151-917719;917449-917718	917008-917151;917719-918120	917449-917718
245	CLCN4	ENSG00000073464.13	ENSG00000073464.13:s:10208045-10208181	-0.0006;0.0006	3.563e-05;3.563e-05	8.796e-01;8.796e-01	0.0217;0.9783	0.0133;0.9867	s|1e1.1o1|i	2	2	0;0	chrX	+	10208181-10208275;10208182-10208274	10208045-10208181;10208275-10208590	10208182-10208274
246	RAB7A	ENSG00000075785.14	ENSG00000075785.14:t:128807618-128807671	-0.0000;0.0000	2.250e-21;1.796e-12	9.991e-01;9.991e-01	0.0050;0.9950	0.0024;0.9976	t|1e1.1o2|i	2	2	0;0	chr3	+	128798036-128807618;128807595-128807617	128797943-128798425;128807618-128807671	128807595-128807617
247	TULP3	ENSG00000078246.17	ENSG00000078246.17:s:2939311-2939788	-0.0002;-0.0002;-0.0002;0.0009	9.930e-06;9.930e-06;9.930e-06;8.686e-05	9.490e-01;9.490e-01;9.490e-01;7.972e-01	0.0098;0.0098;0.0098;0.9706	0.0071;0.0071;0.0071;0.9786	s|1e1.1o1|1e2.1o1|1e3.1o1|i	4	4	0;0;0;0	chr12	+	2939424-2940022;2939424-2940195;2939424-2940530;2939789-2940021	2939311-2939788;2940022-2940081;2940195-2940338;2940530-2941138	2939789-2940021
248	TULP3	ENSG00000078246.17	ENSG00000078246.17:t:2940195-2940338	-0.0002;-0.0002;0.0004	2.889e-05;2.889e-05;1.173e-04	9.012e-01;9.012e-01;7.747e-01	0.0152;0.0152;0.9697	0.0123;0.0123;0.9753	t|1e1.1o1|1e2.1o1|i	3	3	0;0;0	chr12	+	2939424-2940195;2940081-2940195;2940082-2940194	2939311-2939788;2940022-2940081;2940195-2940338	2940082-2940194
249	TULP3	ENSG00000078246.17	ENSG00000078246.17:t:2940530-2941138	-0.0006;0.0006	2.081e-05;2.081e-05	8.955e-01;8.955e-01	0.0200;0.9800	0.0127;0.9873	t|1e1.1o1|i	2	2	0;0	chr12	+	2939424-2940530;2940339-2940529	2939311-2939788;2940530-2941138	2940339-2940529
250	UBA5	ENSG00000081307.15	ENSG00000081307.15:s:132659918-132660050	-0.0005;0.0005	1.655e-03;1.655e-03	5.917e-01;5.917e-01	0.0455;0.9545	0.0436;0.9564	s|1e1.1o1|i	2	2	0;0	chr3	+	132660050-132660185;132660051-132660184	132659918-132660050;132660185-132660477	132660051-132660184
251	UBA5	ENSG00000081307.15	ENSG00000081307.15:s:132660489-132660698	-0.0002;-0.0002;-0.0002;0.0010	1.328e-04;1.328e-04;1.328e-04;1.103e-03	8.614e-01;8.614e-01;8.614e-01;5.820e-01	0.0179;0.0179;0.0179;0.9464	0.0143;0.0143;0.0143;0.9571	s|1e1.1o1|1e2.1o1|1e3.1o1|i	4	4	0;0;0;0	chr3	+	132660698-132660899;132660698-132665823;132660698-132668818;132660699-132660898	132660489-132660698;132660899-132661048;132665739-132665868;132667258-132668927	132660699-132660898
252	UBA5	ENSG00000081307.15	ENSG00000081307.15:t:132676855-132679794	-0.0002;0.0002	2.603e-06;2.604e-06	9.410e-01;9.410e-01	0.0141;0.9859	0.0109;0.9891	t|1e1.1o1|i	2	2	0;0	chr3	+	132675923-132676855;132676754-132676854	132675817-132675923;132676855-132679794	132676754-132676854
253	DIS3	ENSG00000083520.15	ENSG00000083520.15:s:72759473-72759878	-0.0002;0.0002	5.058e-06;5.058e-06	9.302e-01;9.302e-01	0.0152;0.9848	0.0123;0.9877	s|1e1.1o1|i	2	2	0;0	chr13	-	72759163-72759473;72759164-72759472	72752169-72759163;72759473-72759878	72759164-72759472
254	CTTN	ENSG00000085733.16	ENSG00000085733.16:s:70419746-70419856	0.0006;-0.0006	1.304e-03;1.304e-03	6.210e-01;6.210e-01	0.0323;0.9677	0.0455;0.9545	s|1e1.1o1|i	2	2	0;0	chr11	+	70419856-70420400;70419857-70420124	70419746-70419856;70420386-70420510	70419857-70420124
255	CTTN	ENSG00000085733.16	ENSG00000085733.16:s:70435026-70435152	-0.0001;0.0001	1.004e-08;1.011e-08	9.864e-01;9.864e-01	0.0087;0.9913	0.0072;0.9928	s|1e1.1o1|i	2	2	0;0	chr11	+	70435119-70435466;70435153-70435465	70435026-70435152;70435466-70435981	70435153-70435465
256	CTTN	ENSG00000085733.16	ENSG00000085733.16:s:70435466-70435981	-0.0001;-0.0001;0.0001	6.250e-08;6.250e-08;2.835e-07	9.862e-01;9.862e-01;9.595e-01	0.0068;0.0068;0.9864	0.0059;0.0059;0.9882	s|1e1.1o1|2e1.1o1|i	3	2	0;0;0	chr11	+	70435555-70436282;70435744-70436282;70435982-70436281	70435466-70435981;70436282-70436584	70435982-70436281
257	CTTN	ENSG00000085733.16	ENSG00000085733.16:t:70422940-70422995	0.0001;0.0001;0.0001;0.0001;-0.0006	2.475e-04;2.475e-04;2.475e-04;2.475e-04;3.440e-03	8.515e-01;8.515e-01;8.515e-01;8.515e-01;4.597e-01	0.0138;0.0138;0.0138;0.0138;0.9448	0.0167;0.0167;0.0167;0.0167;0.9333	t|1e1.1o1|1e2.1o1|1e3.1o2|1e3.2o2|i	5	4	0;0;0;0;0	chr11	+	70420510-70422940;70421580-70422940;70422592-70422940;70422631-70422940;70422632-70422939	70420386-70420510;70421470-70421580;70422503-70422631;70422940-70422995	70422632-70422939
258	MYL6	ENSG00000092841.19	ENSG00000092841.19:s:56158681-56158711	-0.0001;-0.0001;-0.0001;-0.0001;-0.0001;0.0005	1.673e-05;1.673e-05;1.673e-05;1.673e-05;1.673e-05;3.376e-04	9.440e-01;9.440e-01;9.440e-01;9.440e-01;9.440e-01;6.622e-01	0.0088;0.0088;0.0088;0.0088;0.0088;0.9561	0.0076;0.0076;0.0076;0.0076;0.0076;0.9621	s|1e1.1o1|1e2.1o2|1e2.2o2|1e3.1o1|1e4.1o2|i	6	5	0;0;0;0;0;0	chr12	+	56158711-56158902;56158711-56159498;56158711-56159587;56158711-56159623;56158711-56159975;56158712-56158901	56158681-56158711;56158902-56158940;56159498-56159622;56159623-56159791;56159975-56160148	56158712-56158901
259	MYL6	ENSG00000092841.19	ENSG00000092841.19:s:56159498-56159622	-0.0000;-0.0000;0.0000	2.247e-21;2.247e-21;2.043e-21	1.000e+00;1.000e+00;1.000e+00	0.0014;0.0014;0.9972	0.0008;0.0008;0.9984	s|1e1.1o2|1e1.2o2|i	3	2	0;0;0	chr12	+	56159622-56159975;56159622-56160025;56159623-56159622	56159498-56159622;56159623-56159791;56159975-56160148	56159623-56159622
260	MYL6	ENSG00000092841.19	ENSG00000092841.19:s:56160243-56160343	-0.0000;-0.0000;-0.0000;0.0000	1.863e-06;1.863e-06;1.863e-06;1.730e-05	9.655e-01;9.655e-01;9.655e-01;8.515e-01	0.0076;0.0076;0.0076;0.9773	0.0081;0.0081;0.0081;0.9758	s|1e1.1o1|1e2.1o1|1e3.1o1|i	4	4	0;0;0;0	chr12	+	56160320-56160626;56160320-56161387;56160320-56162264;56160344-56160625	56160243-56160343;56160626-56161298;56161387-56161587;56161781-56162331	56160344-56160625
261	MYL6	ENSG00000092841.19	ENSG00000092841.19:t:56159498-56159622	0.0000;0.0000;0.0000;-0.0000	3.767e-05;3.767e-05;3.767e-05;3.182e-04	9.117e-01;9.117e-01;9.117e-01;6.951e-01	0.0109;0.0109;0.0109;0.9674	0.0125;0.0125;0.0125;0.9625	t|1e1.1o1|2e1.1o1|2e2.1o1|i	4	3	0;0;0;0	chr12	+	56158711-56159498;56158711-56159587;56158940-56159587;56158941-56159497	56158681-56158711;56158902-56158940;56159498-56159622	56158941-56159497
262	MYL6	ENSG00000092841.19	ENSG00000092841.19:t:56159623-56159791	-0.0000;0.0000	2.247e-21;2.043e-21	1.000e+00;1.000e+00	0.0021;0.9979	0.0012;0.9988	t|1e1.1o1|i	2	2	0;0	chr12	+	56158711-56159623;56159623-56159622	56158681-56158711;56159498-56159622;56159623-56159791	56159623-56159622
263	COQ9	ENSG00000088682.14	ENSG00000088682.14:t:57461172-57461270	-0.0005;0.0005	2.796e-05;2.796e-05	8.821e-01;8.821e-01	0.0208;0.9792	0.0145;0.9855	t|1e1.1o3|i	2	2	0;0	chr16	+	57452915-57461172;57460874-57461171	57452801-57454304;57461172-57461270	57460874-57461171
264	HECTD1	ENSG00000092148.14	ENSG00000092148.14:s:31207391-31207804	-0.0005;0.0005	3.037e-05;3.037e-05	8.793e-01;8.793e-01	0.0208;0.9792	0.0147;0.9853	s|1e1.1o1|i	2	2	0;0	chr14	-	31205957-31207391;31207104-31207390	31205797-31206176;31207391-31207804	31207104-31207390
265	SLC7A6	ENSG00000103064.15	ENSG00000103064.15:s:68297234-68297476	-0.0000;0.0000	6.965e-05;6.965e-05	8.304e-01;8.304e-01	0.0217;0.9783	0.0233;0.9767	s|1e1.1o1|i	2	2	0;0	chr16	+	68297476-68298491;68297477-68298490	68297234-68297476;68298491-68301823	68297477-68298490
266	BFAR	ENSG00000103429.11	ENSG00000103429.11:t:14669033-14669236	-0.0003;-0.0003;0.0008	1.876e-04;1.876e-04;7.439e-04	8.185e-01;8.185e-01;6.337e-01	0.0222;0.0222;0.9556	0.0185;0.0185;0.9630	t|1e1.1o1|1e2.1o1|i	3	3	0;0;0	chr16	+	14665071-14669033;14667892-14669033;14668351-14669032	14664869-14665181;14667320-14668350;14669033-14669236	14668351-14669032
267	RBL2	ENSG00000103479.17	ENSG00000103479.17:s:53465438-53466109	-0.0001;0.0001	7.744e-04;7.744e-04	6.580e-01;6.580e-01	0.0385;0.9615	0.0436;0.9564	s|1e1.1o1|i	2	2	0;0	chr16	+	53465602-53467058;53466110-53466773	53465438-53466109;53466774-53467169	53466110-53466773
268	RBL2	ENSG00000103479.17	ENSG00000103479.17:s:53490130-53490301	-0.0001;0.0001	1.167e-06;1.167e-06	9.477e-01;9.477e-01	0.0122;0.9878	0.0123;0.9877	s|1e1.1o1|i	2	2	0;0	chr16	+	53490301-53490515;53490302-53490514	53490130-53490301;53490515-53491648	53490302-53490514
269	MYEF2	ENSG00000104177.19	ENSG00000104177.19:s:48142652-48143071	-0.0001;0.0001	3.050e-09;3.128e-09	9.917e-01;9.917e-01	0.0079;0.9921	0.0060;0.9940	s|1e1.1o1|i	2	2	0;0	chr15	-	48142136-48142896;48142137-48142651	48134632-48142136;48142652-48143071	48142137-48142651
270	MYEF2	ENSG00000104177.19	ENSG00000104177.19:t:48151874-48151942	0.0005;0.0005;-0.0012	5.360e-05;5.360e-05;2.167e-04	8.960e-01;8.960e-01;7.625e-01	0.0098;0.0098;0.9804	0.0208;0.0208;0.9583	t|1e1.1o1|1e2.1o1|i	3	3	0;0;0	chr15	-	48151942-48153792;48151942-48152234;48151943-48152116	48151874-48151942;48152117-48152284;48152307-48154076	48151943-48152116
271	KLHDC4	ENSG00000104731.14	ENSG00000104731.14:s:87701554-87701724	-0.0002;-0.0002;0.0005	2.373e-04;2.373e-04;9.356e-04	8.024e-01;8.024e-01;6.094e-01	0.0230;0.0230;0.9540	0.0222;0.0222;0.9556	s|1e1.1o1|2e1.1o1|i	3	2	0;0;0	chr16	-	87701033-87701638;87701033-87701554;87701034-87701553	87700778-87701033;87701554-87701724	87701034-87701553
272	KLHDC4	ENSG00000104731.14	ENSG00000104731.14:s:87701843-87702591	-0.0003;0.0003	2.311e-04;2.311e-04	7.634e-01;7.634e-01	0.0294;0.9706	0.0263;0.9737	s|1e1.1o1|i	2	2	0;0	chr16	-	87701667-87701843;87701725-87701842	87701554-87701724;87701843-87702591	87701725-87701842
273	KLHDC4	ENSG00000104731.14	ENSG00000104731.14:s:87703321-87703432	-0.0001;0.0001	1.500e-03;1.500e-03	5.952e-01;5.952e-01	0.0455;0.9545	0.0455;0.9545	s|1e1.1o1|i	2	2	0;0	chr16	-	87703187-87703321;87703188-87703320	87703026-87703187;87703321-87703432	87703188-87703320
274	RPS6KB1	ENSG00000108443.14	ENSG00000108443.14:s:59947578-59948188	-0.0003;0.0003	9.607e-05;9.607e-05	8.161e-01;8.161e-01	0.0250;0.9750	0.0217;0.9783	s|1e1.1o1|i	2	2	0;0	chr17	+	59947880-59950160;59948189-59950159	59947578-59948188;59950160-59950574	59948189-59950159
275	RPS6KB1	ENSG00000108443.14	ENSG00000108443.14:t:59947578-59948188	-0.0003;0.0003	9.120e-05;9.120e-05	8.167e-01;8.167e-01	0.0263;0.9737	0.0208;0.9792	t|1e1.1o1|i	2	2	0;0	chr17	+	59945518-59947587;59947462-59947577	59945191-59945518;59947578-59948188	59947462-59947577
276	COMMD9	ENSG00000110442.12	ENSG00000110442.12:s:36274325-36274420	-0.0004;0.0004	3.823e-05;3.823e-05	8.706e-01;8.706e-01	0.0208;0.9792	0.0159;0.9841	s|1e1.1o1|i	2	2	0;0	chr11	-	36274224-36274356;36274225-36274324	36273960-36274224;36274325-36274420	36274225-36274324
277	COMMD9	ENSG00000110442.12	ENSG00000110442.12:s:36274473-36274772	-0.0000;0.0000	2.239e-04;2.239e-04	7.678e-01;7.678e-01	0.0263;0.9737	0.0278;0.9722	s|1e1.1o1|i	2	2	0;0	chr11	-	36274420-36274640;36274421-36274472	36274325-36274420;36274473-36274772	36274421-36274472
278	CD46	ENSG00000117335.21	ENSG00000117335.21:s:207767013-207767195	0.0001;0.0001;0.0001;0.0001;0.0001;-0.0010	8.293e-05;8.293e-05;8.293e-05;8.293e-05;8.293e-05;1.614e-03	9.091e-01;9.091e-01;9.091e-01;9.091e-01;9.091e-01;5.375e-01	0.0090;0.0090;0.0090;0.0090;0.0090;0.9549	0.0119;0.0119;0.0119;0.0119;0.0119;0.9405	s|1e1.1o1|1e2.1o1|1e3.1o1|1e4.1o1|1e5.1o1|i	6	6	0;0;0;0;0;0	chr1	+	207767195-207767607;207767195-207767779;207767195-207769948;207767195-207770321;207767195-207783292;207767196-207767606	207767013-207767195;207767607-207767651;207767779-207769231;207769634-207770123;207770310-207770362;207782731-207783330	207767196-207767606
279	CD46	ENSG00000117335.21	ENSG00000117335.21:s:207767779-207769231	0.0003;0.0003;0.0003;-0.0012	1.097e-04;1.097e-04;1.097e-04;9.264e-04	8.758e-01;8.758e-01;8.758e-01;6.089e-01	0.0125;0.0125;0.0125;0.9625	0.0192;0.0192;0.0192;0.9423	s|1e1.1o1|1e2.1o1|2e1.1o1|i	4	3	0;0;0;0	chr1	+	207767823-207770321;207767823-207783292;207768772-207770321;207769232-207769633	207767779-207769231;207770310-207770362;207782731-207783330	207769232-207769633
280	CD46	ENSG00000117335.21	ENSG00000117335.21:s:207793519-207793873	-0.0001;0.0001	4.181e-06;4.181e-06	9.265e-01;9.265e-01	0.0145;0.9855	0.0135;0.9865	s|1e1.1o1|i	2	2	0;0	chr1	+	207793608-207795005;207793874-207795004	207793519-207793873;207795005-207795513	207793874-207795004
281	CD46	ENSG00000117335.21	ENSG00000117335.21:t:207767779-207769231	0.0003;0.0003;-0.0008	1.719e-04;1.719e-04;6.866e-04	8.335e-01;8.335e-01;6.550e-01	0.0163;0.0163;0.9675	0.0247;0.0247;0.9505	t|1e1.1o1|1e2.1o1|i	3	3	0;0;0	chr1	+	207767195-207767779;207767651-207767779;207767652-207767778	207767013-207767195;207767607-207767651;207767779-207769231	207767652-207767778
282	CD46	ENSG00000117335.21	ENSG00000117335.21:t:207769634-207770123	0.0007;-0.0007	3.770e-04;3.770e-04	7.379e-01;7.379e-01	0.0250;0.9750	0.0385;0.9615	t|1e1.1o1|i	2	2	0;0	chr1	+	207767195-207769948;207769232-207769633	207767013-207767195;207769634-207770123	207769232-207769633
283	REX1BD	ENSG00000006015.18	ENSG00000006015.18:s:18588995-18589077	-0.0001;-0.0001;-0.0001;0.0003	4.273e-05;4.273e-05;4.273e-05;3.626e-04	9.038e-01;9.038e-01;9.038e-01;6.765e-01	0.0125;0.0125;0.0125;0.9625	0.0128;0.0128;0.0128;0.9615	s|1e1.1o2|1e1.2o2|1e2.2o2|i	4	3	0;0;0;0	chr19	+	18589077-18589413;18589077-18589479;18589077-18590854;18589078-18589412	18588995-18589077;18589413-18589683;18589872-18590933	18589078-18589412
284	ZNF263	ENSG00000006194.10	ENSG00000006194.10:s:3299106-3299156	-0.0003;0.0003	1.072e-04;1.072e-04	8.119e-01;8.119e-01	0.0257;0.9743	0.0222;0.9778	s|1e1.1o1|i	2	2	0;0	chr16	+	3299156-3300913;3299157-3300912	3299106-3299156;3300913-3301401	3299157-3300912
285	GAS7	ENSG00000007237.19	ENSG00000007237.19:t:9910606-9917007	-0.0005;0.0005	4.983e-06;4.983e-06	9.375e-01;9.375e-01	0.0167;0.9833	0.0088;0.9912	t|1e1.1o1|i	2	2	0;0	chr17	-	9917007-9946894;9917008-9917052	9910606-9917007;9946894-9946983	9917008-9917052
286	DNAJC11	ENSG00000007923.17	ENSG00000007923.17:t:6634168-6634784	0.0001;-0.0001	2.444e-06;2.444e-06	9.388e-01;9.388e-01	0.0122;0.9878	0.0143;0.9857	t|1e1.1o2|i	2	2	0;0	chr1	-	6634784-6645871;6634785-6635112	6634168-6634784;6645789-6647076	6634785-6635112
287	BAZ1B	ENSG00000009954.11	ENSG00000009954.11:s:73442181-73442553	-0.0003;0.0003	2.635e-06;2.635e-06	9.407e-01;9.407e-01	0.0147;0.9853	0.0105;0.9895	s|1e1.1o1|i	2	2	0;0	chr7	-	73441693-73442181;73441694-73442180	73440406-73441693;73442181-73442553	73441694-73442180
288	UTP18	ENSG00000011260.14	ENSG00000011260.14:t:51288124-51288203	-0.0001;0.0001	2.971e-07;2.972e-07	9.691e-01;9.691e-01	0.0110;0.9890	0.0089;0.9911	t|1e1.1o1|i	2	2	0;0	chr17	+	51285368-51288124;51288078-51288123	51285245-51285368;51288124-51288203	51288078-51288123
289	CAPN1	ENSG00000014216.16	ENSG00000014216.16:t:65182902-65182968	0.0002;-0.0002	7.504e-06;7.504e-06	9.197e-01;9.197e-01	0.0135;0.9865	0.0166;0.9834	t|1e1.1o2|i	2	2	0;0	chr11	+	65182013-65182902;65182891-65182901	65181919-65182308;65182902-65182968	65182891-65182901
290	GLT8D1	ENSG00000016864.19	ENSG00000016864.19:s:52695421-52695587	-0.0002;0.0002	8.082e-04;8.082e-04	6.640e-01;6.640e-01	0.0385;0.9615	0.0345;0.9655	s|1e1.1o1|i	2	2	0;0	chr3	-	52695302-52695421;52695303-52695420	52695190-52695302;52695421-52695587	52695303-52695420
291	GLT8D1	ENSG00000016864.19	ENSG00000016864.19:s:52695928-52696040	-0.0002;0.0002	2.366e-04;2.366e-04	7.559e-01;7.559e-01	0.0286;0.9714	0.0286;0.9714	s|1e1.1o1|i	2	2	0;0	chr3	-	52695587-52695928;52695588-52695927	52695421-52695587;52695928-52696040	52695588-52695927
292	RNF10	ENSG00000022840.17	ENSG00000022840.17:t:120534588-120534836	-0.0000;-0.0000;0.0001	1.098e-09;1.098e-09;5.574e-09	9.963e-01;9.963e-01;9.881e-01	0.0053;0.0053;0.9894	0.0027;0.0027;0.9946	t|1e1.1o1|1e2.1o1|i	3	3	0;0;0	chr12	+	120533621-120534658;120534407-120534658;120534408-120534587	120533480-120533621;120534356-120534407;120534588-120534836	120534408-120534587
293	RNF10	ENSG00000022840.17	ENSG00000022840.17:t:120563441-120563456	-0.0001;0.0001	4.915e-09;4.903e-09	9.921e-01;9.921e-01	0.0080;0.9920	0.0042;0.9958	t|1e1.1o1|i	2	2	0;0	chr12	+	120563070-120563441;120563374-120563440	120562945-120563224;120563441-120563456	120563374-120563440
294	VIM	ENSG00000026025.16	ENSG00000026025.16:s:17235169-17235389	-0.0002;0.0002	5.928e-04;5.928e-04	6.884e-01;6.884e-01	0.0357;0.9643	0.0333;0.9667	s|1e1.1o1|i	2	2	0;0	chr10	+	17235389-17235846;17235390-17235845	17235169-17235389;17235846-17235889	17235390-17235845
295	VIM	ENSG00000026025.16	ENSG00000026025.16:s:17235846-17235889	0.0003;-0.0003	3.814e-04;3.814e-04	7.264e-01;7.264e-01	0.0278;0.9722	0.0333;0.9667	s|1e1.1o1|i	2	2	0;0	chr10	+	17235889-17236294;17235890-17236293	17235846-17235889;17236294-17236379	17235890-17236293
296	CHPF2	ENSG00000033100.17	ENSG00000033100.17:s:151232483-151232814	-0.0002;-0.0002;0.0006	8.111e-05;8.111e-05;3.237e-04	8.627e-01;8.627e-01;7.058e-01	0.0191;0.0191;0.9619	0.0159;0.0159;0.9683	s|1e1.1o1|1e2.1o1|i	3	3	0;0;0	chr7	+	151232814-151234086;151232814-151235048;151232815-151233352	151232483-151232814;151233353-151234274;151235048-151235977	151232815-151233352
297	CHPF2	ENSG00000033100.17	ENSG00000033100.17:s:151236408-151236590	0.0000;0.0000;-0.0001	2.122e-04;2.122e-04;8.400e-04	8.074e-01;8.074e-01;6.172e-01	0.0208;0.0208;0.9583	0.0238;0.0238;0.9524	s|1e1.1o1|1e2.1o1|i	3	3	0;0;0	chr7	+	151236590-151236956;151236590-151237374;151236591-151236955	151236408-151236590;151236956-151237172;151237374-151237593	151236591-151236955
298	CHPF2	ENSG00000033100.17	ENSG00000033100.17:s:151236956-151237172	0.0001;0.0001;0.0001;-0.0005	1.259e-04;1.259e-04;1.259e-04;1.054e-03	8.669e-01;8.669e-01;8.669e-01;5.915e-01	0.0147;0.0147;0.0147;0.9559	0.0179;0.0179;0.0179;0.9462	s|1e1.1o1|1e2.1o1|1e3.2o2|i	4	4	0;0;0;0	chr7	+	151237172-151237374;151237172-151237638;151237172-151239107;151237173-151237373	151236956-151237172;151237374-151237593;151237638-151238822;151238951-151239197	151237173-151237373
299	CHPF2	ENSG00000033100.17	ENSG00000033100.17:t:151237374-151237593	0.0001;0.0001;0.0001;-0.0005	1.259e-04;1.259e-04;1.259e-04;1.054e-03	8.669e-01;8.669e-01;8.669e-01;5.915e-01	0.0147;0.0147;0.0147;0.9559	0.0179;0.0179;0.0179;0.9462	t|1e1.2o2|1e2.1o1|1e3.1o1|i	4	4	0;0;0;0	chr7	+	151235612-151237374;151236590-151237374;151237172-151237374;151237173-151237373	151235048-151235977;151236408-151236590;151236956-151237172;151237374-151237593	151237173-151237373
300	CTNS	ENSG00000040531.16	ENSG00000040531.16:s:3660236-3660350	-0.0003;0.0003	1.511e-03;1.511e-03	5.966e-01;5.966e-01	0.0455;0.9545	0.0455;0.9545	s|1e1.1o1|i	2	2	0;0	chr17	+	3660350-3660617;3660351-3660616	3660236-3660350;3660617-3663103	3660351-3660616
301	ATP6V1H	ENSG00000047249.18	ENSG00000047249.18:s:53833061-53833189	-0.0007;0.0007	6.512e-05;6.512e-05	8.526e-01;8.526e-01	0.0250;0.9750	0.0147;0.9853	s|1e1.1o1|i	2	2	0;0	chr8	-	53829533-53833061;53833010-53833060	53829444-53829533;53833061-53833189	53833010-53833060
302	ATP6V1H	ENSG00000047249.18	ENSG00000047249.18:t:53831789-53833009	-0.0007;0.0007	6.512e-05;6.512e-05	8.526e-01;8.526e-01	0.0250;0.9750	0.0147;0.9853	t|1e1.1o2|i	2	2	0;0	chr8	-	53833009-53841625;53833010-53833060	53831789-53833009;53841578-53841725	53833010-53833060
303	ARID1B	ENSG00000049618.24	ENSG00000049618.24:s:157206167-157208361	-0.0003;0.0003	1.199e-06;1.199e-06	9.546e-01;9.546e-01	0.0140;0.9860	0.0087;0.9913	s|1e1.1o1|i	2	2	0;0	chr6	+	157207491-157208475;157208362-157208474	157206167-157208361;157208475-157210779	157208362-157208474
304	ADNP	ENSG00000101126.18	ENSG00000101126.18:t:50888916-50889957	-0.0001;0.0001	1.171e-06;1.171e-06	9.563e-01;9.563e-01	0.0112;0.9888	0.0108;0.9892	t|1e1.1o1|i	2	2	0;0	chr20	-	50889957-50902017;50889958-50890335	50888916-50889957;50902017-50902109	50889958-50890335
305	ADNP	ENSG00000101126.18	ENSG00000101126.18:t:50903889-50904001	-0.0001;-0.0001;-0.0001;-0.0001;-0.0001;0.0008	1.234e-04;1.234e-04;1.234e-04;1.234e-04;1.234e-04;2.377e-03	8.884e-01;8.884e-01;8.884e-01;8.884e-01;8.884e-01;4.839e-01	0.0134;0.0134;0.0134;0.0134;0.0134;0.9332	0.0123;0.0123;0.0123;0.0123;0.0123;0.9383	t|1e1.1o1|1e2.1o1|1e3.1o1|1e4.1o1|1e5.1o1|i	6	6	0;0;0;0;0;0	chr20	-	50904001-50930826;50904001-50928651;50904001-50918739;50904001-50909500;50904001-50904766;50904002-50904765	50903889-50904001;50904766-50905558;50909500-50909791;50918739-50918781;50928651-50928825;50930826-50931437	50904002-50904765
306	TTI1	ENSG00000101407.13	ENSG00000101407.13:s:38012351-38012538	-0.0004;0.0004	2.990e-05;2.990e-05	8.858e-01;8.858e-01	0.0192;0.9808	0.0152;0.9848	s|1e1.1o1|i	2	2	0;0	chr20	-	38012222-38012351;38012223-38012350	38011515-38012222;38012351-38012538	38012223-38012350
307	TTI1	ENSG00000101407.13	ENSG00000101407.13:s:38013700-38013903	-0.0004;0.0004	1.142e-05;1.142e-05	9.086e-01;9.086e-01	0.0179;0.9821	0.0132;0.9868	s|1e1.1o1|i	2	2	0;0	chr20	-	38012538-38013700;38012539-38013699	38012351-38012538;38013700-38013903	38012539-38013699
308	SFXN3	ENSG00000107819.14	ENSG00000107819.14:t:101038643-101038692	0.0005;-0.0005	5.709e-04;5.709e-04	6.999e-01;6.999e-01	0.0294;0.9706	0.0385;0.9615	t|1e1.1o1|i	2	2	0;0	chr10	+	101037431-101038643;101038010-101038642	101037382-101037431;101038643-101038692	101038010-101038642
309	EEF1B2	ENSG00000114942.14	ENSG00000114942.14:s:206159585-206159684	-0.0002;-0.0002;0.0006	2.368e-06;2.368e-06;1.005e-05	9.603e-01;9.603e-01;8.961e-01	0.0111;0.0111;0.9778	0.0068;0.0068;0.9863	s|1e1.1o2|1e1.2o2|i	3	2	0;0;0	chr2	+	206159684-206159913;206159684-206159959;206159685-206159894	206159585-206159684;206159895-206160059	206159685-206159894
310	PPM1G	ENSG00000115241.11	ENSG00000115241.11:s:27384975-27385088	-0.0000;0.0000	1.395e-10;1.892e-10	9.960e-01;9.960e-01	0.0068;0.9932	0.0045;0.9955	s|1e1.1o1|i	2	2	0;0	chr2	-	27384767-27384975;27384768-27384974	27384673-27384767;27384975-27385088	27384768-27384974
311	RSRP1	ENSG00000117616.18	ENSG00000117616.18:s:25242539-25242705	-0.0004;-0.0004;0.0011	1.123e-05;1.123e-05;4.646e-05	9.368e-01;9.368e-01;8.443e-01	0.0145;0.0145;0.9710	0.0076;0.0076;0.9848	s|1e1.1o2|1e1.2o2|i	3	2	0;0;0	chr1	-	25242426-25242539;25242413-25242539;25242427-25242538	25242249-25242426;25242539-25242705	25242427-25242538
312	RSRP1	ENSG00000117616.18	ENSG00000117616.18:s:25244177-25244224	-0.0006;0.0006	2.575e-04;2.575e-04	7.585e-01;7.585e-01	0.0312;0.9688	0.0238;0.9762	s|1e1.1o1|i	2	2	0;0	chr1	-	25243633-25244177;25244106-25244176	25243550-25243654;25244177-25244224	25244106-25244176
313	RSRP1	ENSG00000117616.18	ENSG00000117616.18:s:25244454-25244498	-0.0001;-0.0001;0.0002	4.348e-05;4.348e-05;1.758e-04	8.991e-01;8.991e-01;7.697e-01	0.0136;0.0136;0.9728	0.0142;0.0142;0.9716	s|1e1.1o1|1e2.1o1|i	3	3	0;0;0	chr1	-	25244224-25244454;25243633-25244454;25244225-25244453	25243550-25243654;25244177-25244224;25244454-25244498	25244225-25244453
314	RSRP1	ENSG00000117616.18	ENSG00000117616.18:s:25244999-25245301	-0.0002;-0.0002;-0.0002;0.0008	1.777e-04;1.777e-04;1.777e-04;1.487e-03	8.516e-01;8.516e-01;8.516e-01;5.595e-01	0.0179;0.0179;0.0179;0.9464	0.0147;0.0147;0.0147;0.9559	s|1e1.1o1|1e2.1o1|1e3.1o1|i	4	4	0;0;0;0	chr1	-	25244498-25245150;25244224-25245150;25243633-25245150;25244499-25244998	25243550-25243654;25244177-25244224;25244454-25244498;25244999-25245301	25244499-25244998
315	RSRP1	ENSG00000117616.18	ENSG00000117616.18:t:25243550-25243654	-0.0002;-0.0002;-0.0002;0.0009	1.999e-05;1.999e-05;1.999e-05;1.727e-04	9.316e-01;9.316e-01;9.316e-01;7.464e-01	0.0119;0.0119;0.0119;0.9643	0.0086;0.0086;0.0086;0.9741	t|1e1.1o1|1e2.1o1|1e3.1o1|i	4	4	0;0;0;0	chr1	-	25243633-25245150;25243633-25244454;25243633-25244177;25243655-25244070	25243550-25243654;25244177-25244224;25244454-25244498;25244999-25245301	25243655-25244070
316	RSRP1	ENSG00000117616.18	ENSG00000117616.18:t:25244177-25244224	-0.0001;-0.0001;0.0002	4.348e-05;4.348e-05;1.758e-04	8.991e-01;8.991e-01;7.697e-01	0.0136;0.0136;0.9728	0.0142;0.0142;0.9716	t|1e1.1o1|1e2.1o1|i	3	3	0;0;0	chr1	-	25244224-25245150;25244224-25244454;25244225-25244453	25244177-25244224;25244454-25244498;25244999-25245301	25244225-25244453
317	RPA2	ENSG00000117748.10	ENSG00000117748.10:s:27891924-27892247	-0.0004;0.0004	1.510e-05;1.510e-05	9.024e-01;9.024e-01	0.0189;0.9811	0.0135;0.9865	s|1e1.1o1|i	2	2	0;0	chr1	-	27891708-27892149;27891709-27891923	27891524-27891708;27891924-27892247	27891709-27891923
318	TRIM67	ENSG00000119283.16	ENSG00000119283.16:s:231162058-231163090	-0.0009;0.0009	1.337e-04;1.337e-04	8.276e-01;8.276e-01	0.0257;0.9743	0.0147;0.9853	s|1e1.1o1|i	2	2	0;0	chr1	+	231163090-231163211;231163091-231163210	231162058-231163090;231163211-231163719	231163091-231163210
319	PCDHB14	ENSG00000120327.7	ENSG00000120327.7:s:141223343-141223540	0.0009;-0.0009	3.984e-04;3.984e-04	7.412e-01;7.412e-01	0.0208;0.9792	0.0385;0.9615	s|1e1.1o1|i	2	2	0;0	chr5	+	141223540-141223909;141223541-141223908	141223343-141223540;141223909-141227759	141223541-141223908
320	ZBTB46	ENSG00000130584.12	ENSG00000130584.12:s:63745143-63745311	-0.0003;0.0003	1.491e-04;1.491e-04	7.891e-01;7.891e-01	0.0278;0.9722	0.0244;0.9756	s|1e1.1o1|i	2	2	0;0	chr20	-	63744681-63745143;63744682-63745142	63743668-63744681;63745143-63745311	63744682-63745142
321	ZBTB46	ENSG00000130584.12	ENSG00000130584.12:s:63746872-63747301	0.0003;-0.0003	2.359e-04;2.359e-04	7.655e-01;7.655e-01	0.0250;0.9750	0.0312;0.9688	s|1e1.1o1|i	2	2	0;0	chr20	-	63745311-63746872;63745312-63746871	63745143-63745311;63746872-63747301	63745312-63746871
322	PPT1	ENSG00000131238.18	ENSG00000131238.18:s:40073673-40074183	-0.0001;0.0001	2.719e-07;2.720e-07	9.673e-01;9.673e-01	0.0103;0.9897	0.0096;0.9904	s|1e1.1o1|i	2	2	0;0	chr1	-	40073457-40073673;40073458-40073672	40072710-40073457;40073673-40074183	40073458-40073672
323	RUSF1	ENSG00000140688.17	ENSG00000140688.17:s:31490273-31490932	0.0000;-0.0000	5.463e-06;5.463e-06	9.176e-01;9.176e-01	0.0147;0.9853	0.0156;0.9844	s|1e1.1o1|i	2	2	0;0	chr16	-	31490154-31490434;31490155-31490272	31489471-31490154;31490273-31490932	31490155-31490272
324	SMARCD3	ENSG00000082014.17	ENSG00000082014.17:s:151239396-151239497	-0.0000;0.0000	1.549e-03;1.549e-03	5.976e-01;5.976e-01	0.0417;0.9583	0.0455;0.9545	s|1e1.1o1|i	2	2	0;0	chr7	-	151239156-151239396;151239157-151239395	151238764-151239156;151239396-151239497	151239157-151239395
325	SMARCD3	ENSG00000082014.17	ENSG00000082014.17:s:151239624-151239746	-0.0002;0.0002	1.706e-04;1.706e-04	7.794e-01;7.794e-01	0.0286;0.9714	0.0263;0.9737	s|1e1.1o1|i	2	2	0;0	chr7	-	151239497-151239624;151239498-151239623	151239396-151239497;151239624-151239746	151239498-151239623
326	SMARCD3	ENSG00000082014.17	ENSG00000082014.17:s:151240422-151240522	-0.0000;0.0000	1.890e-05;1.890e-05	8.818e-01;8.818e-01	0.0185;0.9815	0.0189;0.9811	s|1e1.1o1|i	2	2	0;0	chr7	-	151240247-151240425;151240248-151240421	151240112-151240247;151240422-151240522	151240248-151240421
327	SMARCD3	ENSG00000082014.17	ENSG00000082014.17:s:151240900-151241653	0.0001;-0.0001	3.238e-05;3.238e-05	8.651e-01;8.651e-01	0.0179;0.9821	0.0213;0.9787	s|1e1.1o1|i	2	2	0;0	chr7	-	151240522-151241492;151240523-151240899	151240422-151240522;151240900-151241653	151240523-151240899
328	SMARCD3	ENSG00000082014.17	ENSG00000082014.17:s:151241799-151241978	0.0002;-0.0002	1.329e-04;1.329e-04	7.978e-01;7.978e-01	0.0217;0.9783	0.0294;0.9706	s|1e1.1o1|i	2	2	0;0	chr7	-	151241653-151241877;151241654-151241798	151240900-151241653;151241799-151241978	151241654-151241798
329	NKAIN1	ENSG00000084628.10	ENSG00000084628.10:s:31181239-31181712	-0.0000;0.0000	2.254e-21;2.350e-11	9.980e-01;9.980e-01	0.0058;0.9942	0.0036;0.9964	s|1e1.1o1|i	2	2	0;0	chr1	-	31180686-31181239;31180687-31181238	31179745-31180686;31181239-31181712	31180687-31181238
330	TOX4	ENSG00000092203.15	ENSG00000092203.15:t:21492614-21493257	-0.0000;-0.0000;0.0000	6.506e-10;6.506e-10;3.571e-09	9.960e-01;9.960e-01;9.870e-01	0.0045;0.0045;0.9909	0.0044;0.0044;0.9911	t|1e1.2o4|2e1.2o4|i	3	2	0;0;0	chr14	+	21487646-21492614;21487646-21492616;21492607-21492613	21487451-21487860;21492614-21493257	21492607-21492613
331	ATRNL1	ENSG00000107518.18	ENSG00000107518.18:s:115093365-115093636	-0.0004;-0.0004;0.0009	7.522e-05;7.522e-05;3.002e-04	8.723e-01;8.723e-01;7.215e-01	0.0196;0.0196;0.9608	0.0131;0.0131;0.9738	s|1e1.1o1|1e2.1o1|i	3	3	0;0;0	chr10	+	115093636-115096645;115093636-115120185;115093637-115093858	115093365-115093636;115096645-115096839;115120185-115120268	115093637-115093858
332	DDX5	ENSG00000108654.16	ENSG00000108654.16:s:64500549-64500882	-0.0001;0.0001	1.494e-08;1.498e-08	9.855e-01;9.855e-01	0.0088;0.9912	0.0072;0.9928	s|1e1.1o1|i	2	2	0;0	chr17	-	64500326-64500549;64500327-64500548	64498254-64500326;64500549-64500882	64500327-64500548
333	DDX5	ENSG00000108654.16	ENSG00000108654.16:s:64501261-64501891	-0.0000;-0.0000;0.0000	9.752e-11;9.752e-11;8.483e-10	9.971e-01;9.971e-01;9.905e-01	0.0045;0.0045;0.9909	0.0039;0.0039;0.9921	s|1e2.2o2|2e1.1o1|i	3	3	0;0;0	chr17	-	64500773-64501473;64501143-64501261;64501144-64501260	64500549-64500882;64500987-64501143;64501261-64501891	64501144-64501260
334	DDX5	ENSG00000108654.16	ENSG00000108654.16:s:64502010-64502069	-0.0000;-0.0000;-0.0000;-0.0000;0.0001	2.249e-21;2.249e-21;2.249e-21;2.249e-21;2.203e-10	9.995e-01;9.995e-01;9.995e-01;9.995e-01;9.944e-01	0.0023;0.0023;0.0023;0.0023;0.9908	0.0015;0.0015;0.0015;0.0015;0.9939	s|1e1.1o1|1e2.1o1|1e3.1o2|1e3.2o2|i	5	4	0;0;0;0;0	chr17	-	64501891-64502010;64501143-64502010;64500882-64502010;64500773-64502010;64501892-64502009	64500549-64500882;64500987-64501143;64501261-64501891;64502010-64502069	64501892-64502009
335	DDX5	ENSG00000108654.16	ENSG00000108654.16:s:64502070-64502350	0.0003;-0.0003	1.408e-05;1.408e-05	9.187e-01;9.187e-01	0.0123;0.9877	0.0166;0.9834	s|1e1.1o1|i	2	2	0;0	chr17	-	64502069-64502162;64502070-64502069	64502010-64502069;64502070-64502350	64502070-64502069
336	DDX5	ENSG00000108654.16	ENSG00000108654.16:s:64502439-64502549	0.0000;-0.0000	1.119e-08;1.128e-08	9.853e-01;9.853e-01	0.0076;0.9924	0.0086;0.9914	s|1e1.1o1|i	2	2	0;0	chr17	-	64502223-64502439;64502351-64502438	64502070-64502350;64502439-64502549	64502351-64502438
337	DDX5	ENSG00000108654.16	ENSG00000108654.16:s:64503188-64503348	0.0004;-0.0004	8.666e-05;8.666e-05	8.485e-01;8.485e-01	0.0172;0.9828	0.0240;0.9760	s|1e1.1o1|i	2	2	0;0	chr17	-	64503098-64503188;64503099-64503187	64502585-64503098;64503188-64503348	64503099-64503187
338	DDX5	ENSG00000108654.16	ENSG00000108654.16:s:64503803-64503823	-0.0000;0.0000	6.957e-04;6.957e-04	6.734e-01;6.734e-01	0.0333;0.9667	0.0385;0.9615	s|1e1.1o1|i	2	2	0;0	chr17	-	64503571-64503803;64503647-64503802	64503568-64503646;64503803-64503823	64503647-64503802
339	DDX5	ENSG00000108654.16	ENSG00000108654.16:s:64503983-64504021	-0.0003;0.0003	1.752e-04;1.752e-04	7.880e-01;7.880e-01	0.0263;0.9737	0.0233;0.9767	s|1e1.1o1|i	2	2	0;0	chr17	-	64503868-64503983;64503869-64503982	64503856-64503868;64503983-64504021	64503869-64503982
340	DDX5	ENSG00000108654.16	ENSG00000108654.16:s:64504222-64504318	0.0005;0.0005;-0.0015	3.630e-04;3.630e-04;1.476e-03	7.908e-01;7.908e-01;5.851e-01	0.0167;0.0167;0.9667	0.0278;0.0278;0.9444	s|1e2.2o2|2e1.1o1|i	3	3	0;0;0	chr17	-	64503298-64504273;64504116-64504222;64504117-64504221	64503188-64503348;64504060-64504116;64504222-64504318	64504117-64504221
341	DDX5	ENSG00000108654.16	ENSG00000108654.16:s:64504677-64504880	-0.0000;-0.0000;0.0000	1.687e-04;1.687e-04;6.663e-04	8.207e-01;8.207e-01;6.380e-01	0.0196;0.0196;0.9608	0.0215;0.0215;0.9569	s|1e1.1o1|1e2.1o1|i	3	3	0;0;0	chr17	-	64504318-64504677;64504116-64504677;64504319-64504676	64504060-64504116;64504222-64504318;64504677-64504880	64504319-64504676
342	DDX5	ENSG00000108654.16	ENSG00000108654.16:t:64500549-64500882	-0.0000;-0.0000;-0.0000;-0.0000;-0.0000;0.0000	2.248e-21;2.248e-21;2.248e-21;2.248e-21;2.248e-21;1.216e-10	9.995e-01;9.995e-01;9.995e-01;9.995e-01;9.995e-01;9.929e-01	0.0019;0.0019;0.0019;0.0019;0.0019;0.9904	0.0016;0.0016;0.0016;0.0016;0.0016;0.9920	t|1e1.1o1|1e3.2o2|2e1.1o1|2e2.1o2|2e3.1o2|i	6	4	0;0;0;0;0;0	chr17	-	64500882-64502010;64500882-64500987;64500773-64502010;64500773-64501473;64500773-64501057;64500883-64500986	64500549-64500882;64500987-64501143;64501261-64501891;64502010-64502069	64500883-64500986
343	DDX5	ENSG00000108654.16	ENSG00000108654.16:t:64500987-64501143	-0.0000;-0.0000;0.0000	9.752e-11;9.752e-11;8.483e-10	9.971e-01;9.971e-01;9.905e-01	0.0045;0.0045;0.9909	0.0039;0.0039;0.9921	t|1e1.1o1|1e2.2o2|i	3	3	0;0;0	chr17	-	64501143-64502010;64501143-64501261;64501144-64501260	64500987-64501143;64501261-64501891;64502010-64502069	64501144-64501260
344	KHSRP	ENSG00000088247.19	ENSG00000088247.19:s:6414457-6415301	-0.0000;-0.0000;0.0000	2.248e-21;2.248e-21;1.367e-12	9.997e-01;9.997e-01;9.989e-01	0.0031;0.0031;0.9938	0.0018;0.0018;0.9963	s|1e1.1o1|1e2.1o1|i	3	3	0;0;0	chr19	-	6414120-6415141;6413738-6415141;6414121-6414456	6413641-6413738;6413965-6414120;6414457-6415301	6414121-6414456
345	KHSRP	ENSG00000088247.19	ENSG00000088247.19:t:6413102-6413549	-0.0000;0.0000	2.249e-21;2.086e-13	9.994e-01;9.994e-01	0.0047;0.9953	0.0032;0.9968	t|1e1.1o1|i	2	2	0;0	chr19	-	6413549-6415380;6413550-6413640	6413102-6413549;6415380-6415457	6413550-6413640
346	KHSRP	ENSG00000088247.19	ENSG00000088247.19:t:6413641-6413738	-0.0001;0.0001	2.865e-09;2.892e-09	9.958e-01;9.958e-01	0.0065;0.9935	0.0035;0.9965	t|1e1.1o1|i	2	2	0;0	chr19	-	6413738-6415141;6413739-6413964	6413641-6413738;6414457-6415301	6413739-6413964
347	PLEKHG2	ENSG00000090924.15	ENSG00000090924.15:s:39423733-39423761	-0.0001;0.0001	1.104e-06;1.104e-06	9.555e-01;9.555e-01	0.0119;0.9881	0.0115;0.9885	s|1e1.1o1|i	2	2	0;0	chr19	+	39423761-39425238;39423762-39424310	39423733-39423761;39425238-39425516	39423762-39424310
348	PLEKHG2	ENSG00000090924.15	ENSG00000090924.15:s:39424311-39424455	-0.0000;0.0000	2.419e-08;2.426e-08	9.813e-01;9.813e-01	0.0088;0.9912	0.0088;0.9912	s|1e1.1o1|i	2	2	0;0	chr19	+	39424455-39425238;39424456-39424562	39424311-39424455;39425238-39425516	39424456-39424562
349	PLEKHG2	ENSG00000090924.15	ENSG00000090924.15:s:39425238-39425516	-0.0001;0.0001	2.664e-06;2.664e-06	9.373e-01;9.373e-01	0.0135;0.9865	0.0127;0.9873	s|1e1.1o1|i	2	2	0;0	chr19	+	39425417-39425542;39425517-39425541	39425238-39425516;39425542-39428415	39425517-39425541
350	PLEKHG2	ENSG00000090924.15	ENSG00000090924.15:t:39414065-39414232	0.0002;0.0002;0.0002;-0.0007	3.143e-05;3.143e-05;3.143e-05;2.707e-04	9.231e-01;9.231e-01;9.231e-01;7.225e-01	0.0093;0.0093;0.0093;0.9722	0.0125;0.0125;0.0125;0.9625	t|1e1.1o1|1e2.1o1|1e3.1o1|i	4	4	0;0;0;0	chr19	+	39413412-39414065;39413606-39414065;39413891-39414065;39413892-39414064	39412669-39413412;39413528-39413606;39413665-39413891;39414065-39414232	39413892-39414064
351	PLEKHG2	ENSG00000090924.15	ENSG00000090924.15:t:39425238-39425516	0.0000;0.0000;0.0000;0.0000;-0.0003	6.788e-07;6.788e-07;6.788e-07;6.788e-07;1.070e-05	9.806e-01;9.806e-01;9.806e-01;9.806e-01;8.718e-01	0.0049;0.0049;0.0049;0.0049;0.9802	0.0056;0.0056;0.0056;0.0056;0.9775	t|1e1.1o1|1e2.1o1|1e3.1o1|1e4.1o1|i	5	5	0;0;0;0;0	chr19	+	39422288-39425238;39423761-39425238;39424455-39425238;39424882-39425238;39424883-39425237	39421666-39422288;39423733-39423761;39424311-39424455;39424563-39424882;39425238-39425516	39424883-39425237
352	STX10	ENSG00000104915.15	ENSG00000104915.15:t:13144058-13144139	-0.0006;0.0006	1.510e-04;1.510e-04	7.931e-01;7.931e-01	0.0278;0.9722	0.0217;0.9783	t|1e1.1o1|i	2	2	0;0	chr19	-	13144139-13144577;13144140-13144270	13144058-13144139;13144489-13144671	13144140-13144270
353	EDRF1	ENSG00000107938.18	ENSG00000107938.18:s:125763301-125763706	0.0001;-0.0001	8.884e-05;8.884e-05	8.271e-01;8.271e-01	0.0208;0.9792	0.0238;0.9762	s|1e1.1o1|i	2	2	0;0	chr10	+	125763524-125764041;125763707-125764040	125763301-125763706;125764041-125764143	125763707-125764040
354	VPS29	ENSG00000111237.19	ENSG00000111237.19:s:110499457-110499546	0.0000;0.0000;0.0000;0.0000;-0.0002	1.290e-04;1.290e-04;1.290e-04;1.290e-04;1.739e-03	8.762e-01;8.762e-01;8.762e-01;8.762e-01;5.238e-01	0.0143;0.0143;0.0143;0.0143;0.9429	0.0154;0.0154;0.0154;0.0154;0.9385	s|1e1.1o1|1e2.1o1|2e1.1o1|2e2.1o1|i	5	3	0;0;0;0;0	chr12	-	110498859-110499535;110496203-110499535;110498859-110499457;110496203-110499457;110498860-110499456	110496012-110496217;110498796-110498859;110499457-110499546	110498860-110499456
355	VPS29	ENSG00000111237.19	ENSG00000111237.19:t:110498796-110498859	0.0000;0.0000;0.0000;-0.0002	1.807e-04;1.807e-04;1.807e-04;1.497e-03	8.435e-01;8.435e-01;8.435e-01;5.472e-01	0.0179;0.0179;0.0179;0.9464	0.0192;0.0192;0.0192;0.9423	t|1e1.1o1|1e2.1o2|1e2.2o2|i	4	3	0;0;0;0	chr12	-	110498859-110502049;110498859-110499535;110498859-110499457;110498860-110499456	110498796-110498859;110499457-110499546;110502049-110502111	110498860-110499456
356	SLC41A3	ENSG00000114544.17	ENSG00000114544.17:s:126007114-126007225	-0.0005;0.0005	1.334e-05;1.334e-05	9.140e-01;9.140e-01	0.0172;0.9828	0.0114;0.9886	s|1e1.2o2|i	2	2	0;0	chr3	-	126006564-126007114;126006887-126007113	126006357-126006628;126007114-126007225	126006887-126007113
357	SLC41A3	ENSG00000114544.17	ENSG00000114544.17:t:126006357-126006628	-0.0000;-0.0000;0.0000	2.268e-05;2.268e-05;9.247e-05	9.066e-01;9.066e-01;7.850e-01	0.0133;0.0133;0.9733	0.0145;0.0145;0.9710	t|1e2.1o1|2e1.1o1|i	3	3	0;0;0	chr3	-	126006628-126006717;126006564-126007114;126006629-126006716	126006357-126006628;126006717-126006886;126007114-126007225	126006629-126006716
358	RPS25	ENSG00000118181.11	ENSG00000118181.11:s:119017925-119018053	0.0001;0.0001;0.0001;0.0001;-0.0006	2.602e-05;2.602e-05;2.602e-05;2.602e-05;3.654e-04	9.356e-01;9.356e-01;9.356e-01;9.356e-01;6.858e-01	0.0077;0.0077;0.0077;0.0077;0.9692	0.0111;0.0111;0.0111;0.0111;0.9556	s|1e1.1o1|1e2.1o2|1e2.2o2|2e2.1o2|i	5	3	0;0;0;0;0	chr11	-	119017799-119017958;119017545-119017958;119017433-119017958;119017545-119017925;119017800-119017924	119017361-119017545;119017698-119017799;119017925-119018053	119017800-119017924
359	RPS25	ENSG00000118181.11	ENSG00000118181.11:t:119017361-119017545	0.0000;0.0000;0.0000;-0.0001	3.313e-05;3.313e-05;3.313e-05;2.821e-04	9.130e-01;9.130e-01;9.130e-01;6.989e-01	0.0111;0.0111;0.0111;0.9667	0.0125;0.0125;0.0125;0.9625	t|1e1.1o2|1e1.2o2|2e1.1o2|i	4	2	0;0;0;0	chr11	-	119017545-119017958;119017545-119017925;119017433-119017958;119017546-119017697	119017361-119017545;119017925-119018053	119017546-119017697
360	MED28	ENSG00000118579.13	ENSG00000118579.13:s:17623601-17623794	-0.0002;0.0002	1.392e-06;1.392e-06	9.472e-01;9.472e-01	0.0132;0.9868	0.0116;0.9884	s|1e1.1o1|i	2	2	0;0	chr4	+	17623794-17625656;17623795-17625655	17623601-17623794;17625656-17625845	17623795-17625655
361	MED28	ENSG00000118579.13	ENSG00000118579.13:s:17625656-17625845	0.0000;-0.0000	7.780e-05;7.780e-05	8.263e-01;8.263e-01	0.0227;0.9773	0.0222;0.9778	s|1e1.1o1|i	2	2	0;0	chr4	+	17625845-17628006;17625846-17628005	17625656-17625845;17628006-17628170	17625846-17628005
362	MED28	ENSG00000118579.13	ENSG00000118579.13:s:17630924-17631375	-0.0005;0.0005	1.421e-05;1.421e-05	9.057e-01;9.057e-01	0.0192;0.9808	0.0120;0.9880	s|1e1.1o1|i	2	2	0;0	chr4	+	17631375-17632286;17631376-17632285	17630924-17631375;17632286-17634105	17631376-17632285
363	PPP4R3A	ENSG00000100796.18	ENSG00000100796.18:t:91509506-91509704	-0.0002;-0.0002;0.0006	1.043e-06;1.043e-06;4.491e-06	9.725e-01;9.725e-01;9.251e-01	0.0100;0.0100;0.9801	0.0053;0.0053;0.9894	t|1e1.1o1|1e2.1o1|i	3	3	0;0;0	chr14	-	91509704-91510529;91509704-91510075;91509705-91510074	91509506-91509704;91510075-91510480;91510529-91510554	91509705-91510074
364	PCK2	ENSG00000100889.12	ENSG00000100889.12:t:24103842-24104130	-0.0009;0.0009	3.434e-04;3.434e-04	7.591e-01;7.591e-01	0.0312;0.9688	0.0208;0.9792	t|1e1.1o1|i	2	2	0;0	chr14	+	24103255-24103842;24103723-24103841	24103160-24103255;24103842-24104130	24103723-24103841
365	CD276	ENSG00000103855.18	ENSG00000103855.18:s:73712934-73713063	-0.0000;-0.0000;0.0001	9.186e-10;9.186e-10;4.743e-09	9.959e-01;9.959e-01;9.869e-01	0.0050;0.0050;0.9900	0.0039;0.0039;0.9921	s|1e1.1o1|1e2.1o1|i	3	3	0;0;0	chr15	+	73713063-73713290;73713063-73713842;73713064-73713289	73712934-73713063;73713290-73713677;73713842-73714514	73713064-73713289
366	CD276	ENSG00000103855.18	ENSG00000103855.18:t:73702380-73702593	-0.0003;0.0003	3.616e-06;3.616e-06	9.412e-01;9.412e-01	0.0152;0.9848	0.0102;0.9898	t|1e1.1o1|i	2	2	0;0	chr15	+	73699718-73702380;73702331-73702379	73699586-73699718;73702380-73702593	73702331-73702379
367	CD276	ENSG00000103855.18	ENSG00000103855.18:t:73713842-73714514	-0.0001;0.0001	1.324e-08;1.336e-08	9.890e-01;9.890e-01	0.0078;0.9922	0.0068;0.9932	t|1e1.1o1|i	2	2	0;0	chr15	+	73713063-73713842;73713678-73713841	73712934-73713063;73713842-73714514	73713678-73713841
368	CDC37	ENSG00000105401.9	ENSG00000105401.9:s:10395435-10395837	-0.0002;-0.0002;0.0004	1.197e-05;1.197e-05;4.913e-05	9.323e-01;9.323e-01;8.354e-01	0.0128;0.0128;0.9744	0.0104;0.0104;0.9793	s|1e2.2o2|2e1.1o1|i	3	3	0;0;0	chr19	-	10395038-10395496;10395343-10395435;10395344-10395434	10395021-10395143;10395228-10395343;10395435-10395837	10395344-10395434
369	GARS1	ENSG00000106105.15	ENSG00000106105.15:s:30594832-30594952	-0.0000;-0.0000;-0.0000;0.0001	1.735e-11;1.735e-11;1.735e-11;3.289e-10	9.991e-01;9.991e-01;9.991e-01;9.942e-01	0.0031;0.0031;0.0031;0.9906	0.0014;0.0014;0.0014;0.9958	s|1e1.1o1|2e1.1o1|2e2.1o1|i	4	3	0;0;0;0	chr7	+	30594939-30595108;30594952-30595108;30594952-30598796;30594953-30595107	30594832-30594952;30595108-30595143;30598796-30598897	30594953-30595107
370	GARS1	ENSG00000106105.15	ENSG00000106105.15:t:30632247-30632437	-0.0002;-0.0002;-0.0002;0.0010	2.861e-04;2.861e-04;2.861e-04;2.373e-03	8.166e-01;8.166e-01;8.166e-01;4.975e-01	0.0218;0.0218;0.0218;0.9347	0.0200;0.0200;0.0200;0.9399	t|1e1.1o1|1e2.1o2|1e2.2o2|i	4	3	0;0;0;0	chr7	+	30628669-30632247;30631541-30632247;30631559-30632247;30631560-30632246	30627380-30628669;30631448-30631559;30632247-30632437	30631560-30632246
371	TRIM23	ENSG00000113595.15	ENSG00000113595.15:s:65591448-65591502	-0.0007;0.0007	1.140e-04;1.140e-04	8.192e-01;8.192e-01	0.0278;0.9722	0.0189;0.9811	s|1e1.1o1|i	2	2	0;0	chr5	-	65590302-65591448;65590303-65591447	65589690-65590302;65591448-65591502	65590303-65591447
372	TRIM23	ENSG00000113595.15	ENSG00000113595.15:s:65591843-65591948	-0.0004;-0.0004;0.0011	5.657e-05;5.657e-05;2.281e-04	8.968e-01;8.968e-01;7.642e-01	0.0167;0.0167;0.9667	0.0113;0.0113;0.9774	s|1e1.1o1|2e1.1o1|i	3	2	0;0;0	chr5	-	65591502-65591872;65591502-65591843;65591503-65591842	65591448-65591502;65591843-65591948	65591503-65591842
373	CALD1	ENSG00000122786.20	ENSG00000122786.20:t:134933194-134934077	-0.0001;0.0001	1.286e-08;1.290e-08	9.855e-01;9.855e-01	0.0087;0.9913	0.0072;0.9928	t|1e1.1o2|i	2	2	0;0	chr7	+	134928877-134933194;134933124-134933193	134928754-134928900;134933194-134934077	134933124-134933193
374	CALD1	ENSG00000122786.20	ENSG00000122786.20:t:134968554-134970729	-0.0003;0.0003	1.108e-05;1.108e-05	9.067e-01;9.067e-01	0.0172;0.9828	0.0146;0.9854	t|1e1.1o1|i	2	2	0;0	chr7	+	134965386-134968554;134968403-134968553	134965211-134965437;134968554-134970729	134968403-134968553
375	DNAJB5	ENSG00000137094.16	ENSG00000137094.16:s:34990222-34990611	-0.0003;-0.0003;0.0007	5.386e-06;5.386e-06;2.252e-05	9.467e-01;9.467e-01;8.658e-01	0.0128;0.0128;0.9744	0.0082;0.0082;0.9835	s|1e1.2o2|1e2.1o1|i	3	3	0;0;0	chr9	+	34990611-34990760;34990611-34993200;34990612-34990667	34990222-34990611;34990668-34990812;34993200-34993444	34990612-34990667
376	DNAJB5	ENSG00000137094.16	ENSG00000137094.16:s:34990668-34990812	-0.0001;0.0001	3.159e-04;3.159e-04	7.452e-01;7.452e-01	0.0294;0.9706	0.0286;0.9714	s|1e1.1o1|i	2	2	0;0	chr9	+	34990812-34993200;34990813-34991342	34990668-34990812;34993200-34993444	34990813-34991342
377	DNAJB5	ENSG00000137094.16	ENSG00000137094.16:t:34990668-34990812	-0.0003;-0.0003;0.0007	5.386e-06;5.386e-06;2.252e-05	9.467e-01;9.467e-01;8.658e-01	0.0128;0.0128;0.9744	0.0082;0.0082;0.9835	t|1e1.1o1|2e2.1o1|i	3	3	0;0;0	chr9	+	34989831-34990668;34990611-34990760;34990612-34990667	34989641-34989831;34990222-34990611;34990668-34990812	34990612-34990667
378	DNAJB5	ENSG00000137094.16	ENSG00000137094.16:t:34993200-34993444	-0.0001;-0.0001;-0.0001;-0.0001;-0.0001;0.0005	7.869e-05;7.869e-05;7.869e-05;7.869e-05;7.869e-05;1.537e-03	9.075e-01;9.075e-01;9.075e-01;9.075e-01;9.075e-01;5.353e-01	0.0111;0.0111;0.0111;0.0111;0.0111;0.9444	0.0101;0.0101;0.0101;0.0101;0.0101;0.9494	t|1e1.1o1|1e2.1o1|1e3.1o1|1e4.1o1|1e5.1o1|i	6	6	0;0;0;0;0;0	chr9	+	34989831-34993200;34990611-34993200;34990812-34993200;34991416-34993200;34992986-34993200;34992987-34993199	34989641-34989831;34990222-34990611;34990668-34990812;34991343-34991416;34992872-34992986;34993200-34993444	34992987-34993199
379	SLC22A23	ENSG00000137266.15	ENSG00000137266.15:s:3272829-3273412	0.0000;-0.0000	1.571e-11;4.453e-11	9.968e-01;9.968e-01	0.0055;0.9945	0.0057;0.9943	s|1e1.1o1|i	2	2	0;0	chr6	-	3272491-3272829;3272492-3272828	3268962-3272491;3272829-3273412	3272492-3272828
380	TUBB2A	ENSG00000137267.7	ENSG00000137267.7:s:3155625-3155735	-0.0002;-0.0002;0.0004	1.389e-04;1.389e-04;5.524e-04	8.332e-01;8.332e-01;6.574e-01	0.0208;0.0208;0.9583	0.0196;0.0196;0.9608	s|1e1.1o2|1e1.2o2|i	3	2	0;0;0	chr6	-	3155055-3155625;3154923-3155625;3155056-3155624	3153497-3155055;3155625-3155735	3155056-3155624
381	TUBB2A	ENSG00000137267.7	ENSG00000137267.7:s:3156044-3156152	0.0001;-0.0001	6.343e-04;6.343e-04	6.840e-01;6.840e-01	0.0327;0.9673	0.0371;0.9629	s|1e1.1o1|i	2	2	0;0	chr6	-	3155735-3156044;3155736-3156043	3155625-3155735;3156044-3156152	3155736-3156043
382	TRPS1	ENSG00000104447.13	ENSG00000104447.13:s:115604651-115605002	-0.0008;0.0008	6.323e-05;6.323e-05	8.599e-01;8.599e-01	0.0244;0.9756	0.0137;0.9863	s|1e1.1o1|i	2	2	0;0	chr8	-	115604050-115604651;115604051-115604650	115603873-115604050;115604651-115605002	115604051-115604650
383	APC2	ENSG00000115266.12	ENSG00000115266.12:s:1456853-1457243	0.0003;-0.0003	1.317e-04;1.317e-04	8.021e-01;8.021e-01	0.0208;0.9792	0.0278;0.9722	s|1e1.1o1|i	2	2	0;0	chr19	+	1457243-1457965;1457244-1457964	1456853-1457243;1457965-1458060	1457244-1457964
384	APC2	ENSG00000115266.12	ENSG00000115266.12:t:1452800-1453142	-0.0002;-0.0002;-0.0002;-0.0002;0.0011	7.657e-05;7.657e-05;7.657e-05;7.657e-05;1.076e-03	9.062e-01;9.062e-01;9.062e-01;9.062e-01;5.940e-01	0.0121;0.0121;0.0121;0.0121;0.9515	0.0105;0.0105;0.0105;0.0105;0.9579	t|1e1.1o1|1e2.1o2|1e2.2o2|1e3.1o1|i	5	4	0;0;0;0;0	chr19	+	1446341-1452984;1450330-1452984;1450338-1452984;1452318-1452984;1452319-1452799	1446302-1446341;1450121-1450338;1451289-1452318;1452800-1453142	1452319-1452799
385	ABCB6	ENSG00000115657.14	ENSG00000115657.14:s:219214389-219214683	0.0005;-0.0005	3.542e-04;3.542e-04	7.405e-01;7.405e-01	0.0233;0.9767	0.0357;0.9643	s|1e1.1o1|i	2	2	0;0	chr2	-	219214186-219214389;219214187-219214388	219214121-219214186;219214389-219214683	219214187-219214388
386	TRIM62	ENSG00000116525.14	ENSG00000116525.14:s:33181994-33182059	-0.0007;-0.0007;0.0018	2.647e-04;2.647e-04;1.055e-03	8.125e-01;8.125e-01;6.204e-01	0.0267;0.0267;0.9466	0.0152;0.0152;0.9697	s|1e1.1o2|1e1.2o2|i	3	2	0;0;0	chr1	-	33181494-33181994;33181421-33181994;33181495-33181993	33181025-33181494;33181994-33182059	33181495-33181993
387	ATL2	ENSG00000119787.14	ENSG00000119787.14:t:38293954-38296113	-0.0006;0.0006	9.832e-05;9.832e-05	8.230e-01;8.230e-01	0.0263;0.9737	0.0185;0.9815	t|1e1.1o1|i	2	2	0;0	chr2	-	38296113-38298144;38296114-38296482	38293954-38296113;38297931-38298575	38296114-38296482
388	CEP89	ENSG00000121289.18	ENSG00000121289.18:s:32878218-32878421	-0.0003;0.0003	8.157e-04;8.157e-04	6.589e-01;6.589e-01	0.0385;0.9615	0.0385;0.9615	s|1e1.1o1|i	2	2	0;0	chr19	-	32876217-32878218;32876218-32878217	32875925-32876217;32878218-32878421	32876218-32878217
389	PSPC1	ENSG00000121390.19	ENSG00000121390.19:s:19782917-19783019	-0.0006;0.0006	4.449e-05;4.449e-05	8.975e-01;8.975e-01	0.0189;0.9811	0.0123;0.9877	s|1e1.1o1|i	2	2	0;0	chr13	-	19782791-19782917;19782792-19782916	19782386-19782791;19782917-19783019	19782792-19782916
390	PSPC1	ENSG00000121390.19	ENSG00000121390.19:t:19674752-19674984	-0.0004;0.0004	2.593e-04;2.593e-04	7.550e-01;7.550e-01	0.0312;0.9688	0.0263;0.9737	t|1e1.1o1|i	2	2	0;0	chr13	-	19674984-19677724;19674985-19675387	19674752-19674984;19677724-19679110	19674985-19675387
391	STX16	ENSG00000124222.22	ENSG00000124222.22:s:58651253-58651531	-0.0001;-0.0001;-0.0001;-0.0001;0.0003	1.044e-06;1.044e-06;1.044e-06;1.044e-06;1.612e-05	9.771e-01;9.771e-01;9.771e-01;9.771e-01;8.537e-01	0.0059;0.0059;0.0059;0.0059;0.9765	0.0053;0.0053;0.0053;0.0053;0.9789	s|1e1.1o1|2e1.1o1|3e1.1o1|4e1.1o1|i	5	2	0;0;0;0;0	chr20	+	58651406-58652073;58651414-58652073;58651434-58652073;58651531-58652073;58651532-58651604	58651253-58651531;58651605-58652087	58651532-58651604
392	STX16	ENSG00000124222.22	ENSG00000124222.22:s:58651605-58652087	-0.0001;-0.0001;-0.0001;-0.0001;0.0005	1.463e-06;1.463e-06;1.463e-06;1.463e-06;2.261e-05	9.734e-01;9.734e-01;9.734e-01;9.734e-01;8.360e-01	0.0067;0.0067;0.0067;0.0067;0.9733	0.0055;0.0055;0.0055;0.0055;0.9781	s|1e1.1o1|1e2.1o1|1e3.2o2|1e4.1o1|i	5	5	0;0;0;0;0	chr20	+	58652087-58659623;58652087-58667201;58652087-58667490;58652087-58670512;58652088-58652096	58651605-58652087;58659623-58659634;58667201-58667318;58667487-58667608;58670512-58670603	58652088-58652096
393	MIR9-1HG	ENSG00000125462.19	ENSG00000125462.19:s:156407697-156409030	-0.0001;-0.0001;0.0002	3.375e-08;3.375e-08;1.557e-07	9.881e-01;9.881e-01;9.646e-01	0.0068;0.0068;0.9864	0.0054;0.0054;0.9892	s|1e1.1o1|1e2.1o1|i	3	3	0;0;0	chr1	-	156407197-156407842;156404601-156407842;156407198-156407696	156404250-156404601;156407080-156407197;156407697-156409030	156407198-156407696
394	MIR9-1HG	ENSG00000125462.19	ENSG00000125462.19:s:156413413-156413497	-0.0000;-0.0000;0.0000	4.034e-08;4.034e-08;1.853e-07	9.872e-01;9.872e-01;9.621e-01	0.0062;0.0062;0.9877	0.0062;0.0062;0.9877	s|1e1.1o1|1e2.1o1|i	3	3	0;0;0	chr1	-	156407975-156413413;156404601-156413413;156412709-156413412	156404250-156404601;156407697-156409030;156413413-156413497	156412709-156413412
395	MIR9-1HG	ENSG00000125462.19	ENSG00000125462.19:s:156413916-156414298	-0.0000;-0.0000;-0.0000;0.0002	1.210e-08;1.210e-08;1.210e-08;1.286e-07	9.934e-01;9.934e-01;9.934e-01;9.631e-01	0.0047;0.0047;0.0047;0.9860	0.0039;0.0039;0.0039;0.9884	s|1e1.1o1|2e1.1o1|2e2.1o1|i	4	3	0;0;0;0	chr1	-	156407975-156414084;156407975-156414056;156404601-156414056;156413498-156413915	156404250-156404601;156407697-156409030;156413916-156414298	156413498-156413915
396	MIR9-1HG	ENSG00000125462.19	ENSG00000125462.19:s:156415397-156417439	-0.0000;-0.0000;-0.0000;0.0002	1.204e-07;1.204e-07;1.204e-07;1.216e-06	9.855e-01;9.855e-01;9.855e-01;9.273e-01	0.0060;0.0060;0.0060;0.9821	0.0049;0.0049;0.0049;0.9853	s|1e1.1o1|1e2.1o1|2e1.1o1|i	4	3	0;0;0;0	chr1	-	156414753-156416769;156407975-156416769;156414753-156415397;156414754-156415396	156407697-156409030;156414654-156414753;156415397-156417439	156414754-156415396
397	MIR9-1HG	ENSG00000125462.19	ENSG00000125462.19:s:156426798-156426872	-0.0000;-0.0000;-0.0000;-0.0000;-0.0000;0.0001	1.120e-07;1.120e-07;1.120e-07;1.120e-07;1.120e-07;2.796e-06	9.891e-01;9.891e-01;9.891e-01;9.891e-01;9.891e-01;8.968e-01	0.0041;0.0041;0.0041;0.0041;0.0041;0.9797	0.0040;0.0040;0.0040;0.0040;0.0040;0.9802	s|1e1.1o1|1e2.1o1|1e3.1o1|1e4.1o1|1e5.1o1|i	6	6	0;0;0;0;0;0	chr1	-	156426668-156426798;156418034-156426798;156416864-156426798;156414753-156426798;156404601-156426798;156426669-156426797	156404250-156404601;156414654-156414753;156415397-156417439;156417912-156418034;156425637-156426668;156426798-156426872	156426669-156426797
398	MIR9-1HG	ENSG00000125462.19	ENSG00000125462.19:t:156413413-156413497	-0.0001;0.0001	4.668e-08;4.674e-08	9.814e-01;9.814e-01	0.0093;0.9907	0.0077;0.9923	t|1e1.1o1|i	2	2	0;0	chr1	-	156413497-156414654;156413498-156413915	156413413-156413497;156414654-156414753	156413498-156413915
399	MEF2C	ENSG00000081189.16	ENSG00000081189.16:s:88883049-88883466	-0.0001;0.0001	3.157e-08;3.157e-08	9.883e-01;9.883e-01	0.0087;0.9913	0.0043;0.9957	s|1e1.2o2|i	2	2	0;0	chr5	-	88823927-88883049;88883000-88883048	88823796-88824275;88883049-88883466	88883000-88883048
400	MEF2C	ENSG00000081189.16	ENSG00000081189.16:t:88717117-88722829	-0.0001;-0.0001;0.0002	4.672e-09;4.672e-09;2.229e-08	9.955e-01;9.955e-01;9.859e-01	0.0055;0.0055;0.9891	0.0029;0.0029;0.9943	t|1e1.1o1|2e1.1o1|i	3	2	0;0;0	chr5	-	88722829-88728493;88722827-88728493;88722830-88722836	88717117-88722829;88728493-88728628	88722830-88722836
401	MEF2C	ENSG00000081189.16	ENSG00000081189.16:t:88882955-88882999	-0.0001;-0.0001;-0.0001;0.0003	8.086e-09;8.086e-09;8.086e-09;8.734e-08	9.959e-01;9.959e-01;9.959e-01;9.764e-01	0.0043;0.0043;0.0043;0.9870	0.0022;0.0022;0.0022;0.9935	t|1e1.1o1|1e2.1o1|1e3.1o1|i	4	4	0;0;0;0	chr5	-	88882999-88887502;88882999-88884328;88882999-88883652;88883000-88883048	88882955-88882999;88883652-88883747;88884328-88884426;88887392-88887598	88883000-88883048
402	SRRT	ENSG00000087087.20	ENSG00000087087.20:s:100888035-100888143	0.0001;0.0001;0.0001;-0.0003	4.490e-05;4.490e-05;4.490e-05;3.818e-04	9.091e-01;9.091e-01;9.091e-01;6.875e-01	0.0104;0.0104;0.0104;0.9688	0.0132;0.0132;0.0132;0.9605	s|1e1.1o2|1e1.2o2|1e2.1o1|i	4	3	0;0;0;0	chr7	+	100888143-100888257;100888143-100888278;100888143-100888474;100888144-100888256	100888035-100888143;100888257-100888383;100888474-100888664	100888144-100888256
403	MAZ	ENSG00000103495.15	ENSG00000103495.15:s:29806978-29807066	-0.0000;-0.0000;0.0000	2.247e-21;2.247e-21;4.885e-15	9.999e-01;9.999e-01;9.997e-01	0.0025;0.0025;0.9950	0.0013;0.0013;0.9975	s|1e1.3o4|1e1.4o4|i	3	2	0;0;0	chr16	+	29807066-29810110;29807066-29810116;29807067-29807535	29806978-29807066;29810077-29810418	29807067-29807535
404	MAZ	ENSG00000103495.15	ENSG00000103495.15:s:29810077-29810418	-0.0000;0.0000	2.247e-21;2.043e-21	1.000e+00;1.000e+00	0.0024;0.9976	0.0013;0.9987	s|1e1.1o1|i	2	2	0;0	chr16	+	29810227-29811006;29810419-29811005	29810077-29810418;29811006-29811164	29810419-29811005
405	BCKDK	ENSG00000103507.14	ENSG00000103507.14:s:31111869-31112027	-0.0000;-0.0000;0.0001	3.535e-04;3.535e-04;1.418e-03	7.895e-01;7.895e-01;5.856e-01	0.0222;0.0222;0.9556	0.0215;0.0215;0.9569	s|1e1.1o2|1e1.2o2|i	3	2	0;0;0	chr16	+	31112027-31112121;31112027-31112197;31112028-31112120	31111869-31112027;31112121-31112791	31112028-31112120
406	PPP1R17	ENSG00000106341.11	ENSG00000106341.11:s:31707204-31707420	-0.0003;0.0003	1.446e-06;1.446e-06	9.534e-01;9.534e-01	0.0132;0.9868	0.0093;0.9907	s|1e1.1o1|i	2	2	0;0	chr7	+	31707420-31707515;31707421-31707514	31707204-31707420;31707515-31708455	31707421-31707514
407	TMEM104	ENSG00000109066.14	ENSG00000109066.14:s:74835927-74837353	-0.0005;0.0005	1.030e-03;1.030e-03	6.360e-01;6.360e-01	0.0417;0.9583	0.0371;0.9629	s|1e1.1o1|i	2	2	0;0	chr17	+	74837353-74837590;74837354-74837589	74835927-74837353;74837590-74837908	74837354-74837589
408	TMEM104	ENSG00000109066.14	ENSG00000109066.14:t:74838887-74839753	-0.0000;0.0000	5.822e-04;5.822e-04	6.895e-01;6.895e-01	0.0333;0.9667	0.0357;0.9643	t|1e1.1o1|i	2	2	0;0	chr17	+	74819843-74838887;74837909-74838886	74819750-74819843;74838887-74839753	74837909-74838886
409	SLC11A2	ENSG00000110911.17	ENSG00000110911.17:s:51008586-51008624	-0.0005;0.0005	9.761e-06;9.760e-06	9.180e-01;9.180e-01	0.0167;0.9833	0.0113;0.9887	s|1e1.1o1|i	2	2	0;0	chr12	-	51005436-51008586;51008545-51008585	51005311-51005436;51008586-51008624	51008545-51008585
410	SLC11A2	ENSG00000110911.17	ENSG00000110911.17:t:51008145-51008544	-0.0005;0.0005	9.761e-06;9.760e-06	9.180e-01;9.180e-01	0.0167;0.9833	0.0113;0.9887	t|1e1.1o1|i	2	2	0;0	chr12	-	51008544-51010695;51008545-51008585	51008145-51008544;51010695-51010766	51008545-51008585
411	CAMKK2	ENSG00000110931.19	ENSG00000110931.19:t:121237675-121240542	-0.0005;0.0005	2.053e-05;2.053e-05	8.969e-01;8.969e-01	0.0192;0.9808	0.0135;0.9865	t|1e1.1o1|i	2	2	0;0	chr12	-	121240542-121244573;121240543-121240546	121237675-121240542;121244573-121244615	121240543-121240546
412	EIF2B1	ENSG00000111361.13	ENSG00000111361.13:s:123627044-123627156	-0.0002;0.0002	1.426e-03;1.426e-03	5.960e-01;5.960e-01	0.0455;0.9545	0.0436;0.9564	s|1e1.1o1|i	2	2	0;0	chr12	-	123626493-123627044;123626494-123627043	123625967-123626493;123627044-123627156	123626494-123627043
413	CAND1	ENSG00000111530.13	ENSG00000111530.13:s:67305104-67305312	-0.0000;0.0000	3.485e-11;7.039e-11	9.975e-01;9.975e-01	0.0063;0.9937	0.0030;0.9970	s|1e1.1o1|i	2	2	0;0	chr12	+	67305312-67307397;67305313-67305542	67305104-67305312;67307397-67307492	67305313-67305542
414	CAND1	ENSG00000111530.13	ENSG00000111530.13:t:67305543-67306597	-0.0000;0.0000	3.485e-11;7.039e-11	9.975e-01;9.975e-01	0.0063;0.9937	0.0030;0.9970	t|1e1.1o2|i	2	2	0;0	chr12	+	67304681-67305543;67305313-67305542	67304605-67304746;67305543-67306597	67305313-67305542
415	ENO2	ENSG00000111674.9	ENSG00000111674.9:s:6916417-6916512	-0.0006;-0.0006;0.0015	3.093e-04;3.093e-04;1.223e-03	7.903e-01;7.903e-01;5.898e-01	0.0303;0.0303;0.9394	0.0190;0.0190;0.9620	s|1e1.1o1|1e2.1o1|i	3	3	0;0;0	chr12	+	6916512-6916671;6916512-6917581;6916513-6916670	6916417-6916512;6916671-6916812;6917329-6917714	6916513-6916670
416	ENO2	ENSG00000111674.9	ENSG00000111674.9:s:6916671-6916812	-0.0005;0.0005	5.169e-05;5.169e-05	8.593e-01;8.593e-01	0.0217;0.9783	0.0155;0.9845	s|1e1.1o1|i	2	2	0;0	chr12	+	6916729-6917038;6916813-6917037	6916671-6916812;6917038-6917259	6916813-6917037
417	MDN1	ENSG00000112159.12	ENSG00000112159.12:s:89643512-89644193	0.0003;-0.0003	1.058e-04;1.058e-04	8.187e-01;8.187e-01	0.0196;0.9804	0.0270;0.9730	s|1e1.1o1|i	2	2	0;0	chr6	-	89643212-89643943;89643213-89643511	89642498-89643212;89643512-89644193	89643213-89643511
418	QKI	ENSG00000112531.17	ENSG00000112531.17:s:163563420-163563719	0.0001;0.0001;0.0001;-0.0006	2.507e-04;2.507e-04;2.507e-04;2.120e-03	8.352e-01;8.352e-01;8.352e-01;5.250e-01	0.0147;0.0147;0.0147;0.9559	0.0200;0.0200;0.0200;0.9399	s|1e1.1o1|1e2.1o2|1e2.2o2|i	4	3	0;0;0;0	chr6	+	163563719-163564667;163563719-163565946;163563719-163566721;163563720-163564666	163563420-163563719;163564667-163564710;163565946-163566795	163563720-163564666
419	PAF1	ENSG00000006712.15	ENSG00000006712.15:t:39385629-39386219	-0.0001;0.0001	6.144e-09;6.215e-09	9.908e-01;9.908e-01	0.0078;0.9922	0.0060;0.9940	t|1e1.1o1|i	2	2	0;0	chr19	-	39386219-39386482;39386220-39386364	39385629-39386219;39386482-39386572	39386220-39386364
420	PAX6	ENSG00000007372.25	ENSG00000007372.25:s:31803398-31803471	-0.0003;0.0003	2.867e-04;2.867e-04	7.494e-01;7.494e-01	0.0294;0.9706	0.0278;0.9722	s|1e1.1o1|i	2	2	0;0	chr11	-	31802834-31803398;31803246-31803397	31802704-31802946;31803398-31803471	31803246-31803397
421	PAX6	ENSG00000007372.25	ENSG00000007372.25:s:31803952-31804267	-0.0005;0.0005	2.514e-04;2.514e-04	7.677e-01;7.677e-01	0.0278;0.9722	0.0227;0.9773	s|1e1.1o1|i	2	2	0;0	chr11	-	31802834-31803952;31803727-31803951	31802704-31802946;31803952-31804267	31803727-31803951
422	PAX6	ENSG00000007372.25	ENSG00000007372.25:s:31804452-31804619	0.0002;-0.0002	7.793e-04;7.793e-04	6.610e-01;6.610e-01	0.0357;0.9643	0.0417;0.9583	s|1e1.1o1|i	2	2	0;0	chr11	-	31802834-31804452;31804268-31804451	31802704-31802946;31804452-31804619	31804268-31804451
423	PAX6	ENSG00000007372.25	ENSG00000007372.25:s:31811213-31811341	-0.0002;0.0002	5.950e-06;5.950e-06	9.151e-01;9.151e-01	0.0167;0.9833	0.0143;0.9857	s|1e1.1o1|i	2	2	0;0	chr11	-	31811015-31811213;31811145-31811212	31810828-31811068;31811213-31811341	31811145-31811212
424	PAX6	ENSG00000007372.25	ENSG00000007372.25:t:31803584-31803726	-0.0003;-0.0003;0.0008	1.175e-04;1.175e-04;4.686e-04	8.515e-01;8.515e-01;6.857e-01	0.0185;0.0185;0.9630	0.0152;0.0152;0.9697	t|1e1.1o1|1e2.1o1|i	3	3	0;0;0	chr11	-	31803726-31806402;31803726-31805389;31803727-31803951	31803584-31803726;31805389-31806013;31806344-31806411	31803727-31803951
425	SPAG9	ENSG00000008294.22	ENSG00000008294.22:s:50965060-50965494	-0.0002;0.0002	1.459e-06;1.459e-06	9.436e-01;9.436e-01	0.0139;0.9861	0.0117;0.9883	s|1e1.1o1|i	2	2	0;0	chr17	-	50964394-50965060;50964395-50965059	50962174-50964394;50965060-50965494	50964395-50965059
426	SEC62	ENSG00000008952.17	ENSG00000008952.17:s:169992594-169993101	-0.0001;0.0001	2.433e-08;2.446e-08	9.856e-01;9.856e-01	0.0090;0.9910	0.0067;0.9933	s|1e1.1o1|i	2	2	0;0	chr3	+	169993101-169993655;169993102-169993654	169992594-169993101;169993655-169998373	169993102-169993654
427	LYPLA2	ENSG00000011009.11	ENSG00000011009.11:t:23794552-23794600	0.0000;-0.0000	2.155e-06;2.155e-06	9.354e-01;9.354e-01	0.0135;0.9865	0.0143;0.9857	t|1e1.1o1|i	2	2	0;0	chr1	+	23794325-23794552;23794512-23794551	23794224-23794325;23794552-23794600	23794512-23794551
428	PGM3	ENSG00000013375.16	ENSG00000013375.16:s:83167794-83169323	-0.0005;-0.0005;0.0012	7.011e-05;7.011e-05;2.809e-04	8.852e-01;8.852e-01;7.431e-01	0.0191;0.0191;0.9619	0.0113;0.0113;0.9774	s|1e1.1o1|2e2.1o1|i	3	3	0;0;0	chr6	-	83166466-83169242;83161242-83169063;83166467-83167793	83161150-83161242;83164873-83166466;83167794-83169323	83166467-83167793
429	MATR3	ENSG00000015479.20	ENSG00000015479.20:s:139310043-139315214	0.0000;0.0000;-0.0001	9.975e-05;9.975e-05;4.002e-04	8.594e-01;8.594e-01;6.990e-01	0.0163;0.0163;0.9675	0.0175;0.0175;0.9649	s|1e1.1o1|1e2.1o1|i	3	3	0;0;0	chr5	+	139314736-139315697;139314736-139316076;139315215-139315346	139310043-139315214;139315347-139315738;139315751-139316188	139315215-139315346
430	MATR3	ENSG00000015479.20	ENSG00000015479.20:t:139315347-139315738	0.0000;0.0000;0.0000;-0.0001	6.206e-05;6.206e-05;6.206e-05;5.281e-04	8.983e-01;8.983e-01;8.983e-01;6.610e-01	0.0122;0.0122;0.0122;0.9634	0.0132;0.0132;0.0132;0.9605	t|1e1.1o1|1e2.1o1|1e3.1o1|i	4	4	0;0;0;0	chr5	+	139293772-139315697;139293805-139315697;139314736-139315697;139315215-139315346	139293674-139293772;139293778-139293805;139310043-139315214;139315347-139315738	139315215-139315346
431	MNAT1	ENSG00000020426.11	ENSG00000020426.11:t:60968559-60969965	-0.0002;-0.0002;0.0005	1.944e-04;1.944e-04;7.700e-04	8.152e-01;8.152e-01;6.289e-01	0.0208;0.0208;0.9583	0.0208;0.0208;0.9583	t|1e1.1o1|1e2.1o1|i	3	3	0;0;0	chr14	+	60879835-60968559;60968397-60968559;60968398-60968558	60879714-60880041;60968229-60968397;60968559-60969965	60968398-60968558
432	GRAMD1B	ENSG00000023171.20	ENSG00000023171.20:s:123622506-123626401	-0.0001;0.0001	1.023e-05;1.023e-05	9.034e-01;9.034e-01	0.0167;0.9833	0.0156;0.9844	s|1e1.1o1|i	2	2	0;0	chr11	+	123622638-123626594;123626402-123626593	123622506-123626401;123626594-123627774	123626402-123626593
433	CD44	ENSG00000026508.21	ENSG00000026508.21:s:35180274-35180329	0.0014;-0.0014	2.791e-04;2.791e-04	8.013e-01;8.013e-01	0.0125;0.9875	0.0371;0.9629	s|1e1.2o2|i	2	2	0;0	chr11	+	35180329-35219340;35180330-35180357	35180274-35180329;35218929-35219387	35180330-35180357
434	CD44	ENSG00000026508.21	ENSG00000026508.21:s:35189835-35189972	0.0002;0.0002;0.0002;-0.0008	1.223e-06;1.223e-06;1.223e-06;1.134e-05	9.784e-01;9.784e-01;9.784e-01;8.989e-01	0.0043;0.0043;0.0043;0.9872	0.0079;0.0079;0.0079;0.9762	s|1e1.1o2|1e2.1o1|1e3.1o1|i	4	4	0;0;0;0	chr11	+	35189972-35208105;35189972-35211246;35189972-35214852;35189973-35190009	35189835-35189972;35208105-35208206;35211246-35211449;35214666-35214914	35189973-35190009
435	PIAS1	ENSG00000033800.14	ENSG00000033800.14:s:68187542-68188231	-0.0004;0.0004	2.844e-05;2.844e-05	8.826e-01;8.826e-01	0.0204;0.9796	0.0152;0.9848	s|1e1.1o1|i	2	2	0;0	chr15	+	68188231-68189203;68188232-68189202	68187542-68188231;68189203-68189270	68188232-68189202
436	PIAS1	ENSG00000033800.14	ENSG00000033800.14:s:68189203-68189270	-0.0004;0.0004	9.891e-06;9.891e-06	9.106e-01;9.106e-01	0.0175;0.9825	0.0133;0.9867	s|1e1.1o1|i	2	2	0;0	chr15	+	68189270-68190493;68189271-68190492	68189203-68189270;68190493-68190758	68189271-68190492
437	PHF23	ENSG00000040633.13	ENSG00000040633.13:s:7236290-7236566	-0.0001;0.0001	9.137e-09;9.231e-09	9.882e-01;9.882e-01	0.0083;0.9917	0.0067;0.9933	s|1e1.1o1|i	2	2	0;0	chr17	-	7236118-7236481;7236119-7236289	7235930-7236118;7236290-7236566	7236119-7236289
438	PHF23	ENSG00000040633.13	ENSG00000040633.13:t:7236290-7236566	-0.0001;0.0001	6.623e-08;6.631e-08	9.775e-01;9.775e-01	0.0103;0.9897	0.0080;0.9920	t|1e1.1o1|i	2	2	0;0	chr17	-	7236566-7237385;7236567-7236616	7236290-7236566;7237385-7237477	7236567-7236616
439	HSPA5	ENSG00000044574.9	ENSG00000044574.9:s:125240172-125240309	-0.0006;0.0006	1.982e-03;1.982e-03	5.718e-01;5.718e-01	0.0417;0.9583	0.0436;0.9564	s|1e1.1o1|i	2	2	0;0	chr9	-	125239533-125240172;125239534-125240171	125239421-125239533;125240172-125240309	125239534-125240171
440	TMEM132A	ENSG00000006118.15	ENSG00000006118.15:s:60933542-60933744	-0.0001;0.0001	1.462e-03;1.462e-03	6.016e-01;6.016e-01	0.0455;0.9545	0.0417;0.9583	s|1e1.1o1|i	2	2	0;0	chr11	+	60933744-60934488;60933745-60933996	60933542-60933744;60934338-60934617	60933745-60933996
441	TMEM132A	ENSG00000006118.15	ENSG00000006118.15:s:60935252-60935443	-0.0002;0.0002	8.500e-04;8.500e-04	6.574e-01;6.574e-01	0.0357;0.9643	0.0385;0.9615	s|1e1.1o1|i	2	2	0;0	chr11	+	60935443-60935864;60935444-60935863	60935252-60935443;60935864-60936016	60935444-60935863
442	TMEM132A	ENSG00000006118.15	ENSG00000006118.15:s:60935864-60936016	-0.0000;0.0000	2.254e-21;1.915e-11	9.980e-01;9.980e-01	0.0057;0.9943	0.0043;0.9957	s|1e1.1o1|i	2	2	0;0	chr11	+	60936016-60936747;60936017-60936746	60935864-60936016;60936747-60937159	60936017-60936746
443	TMEM132A	ENSG00000006118.15	ENSG00000006118.15:t:60933542-60933744	0.0001;0.0001;-0.0004	3.557e-04;3.557e-04;1.406e-03	7.746e-01;7.746e-01;5.682e-01	0.0230;0.0230;0.9540	0.0267;0.0267;0.9466	t|1e1.1o1|1e2.1o1|i	3	3	0;0;0	chr11	+	60931884-60933542;60932127-60933542;60932128-60933541	60931686-60931884;60931984-60932127;60933542-60933744	60932128-60933541
444	TMEM132A	ENSG00000006118.15	ENSG00000006118.15:t:60934338-60934617	-0.0002;-0.0002;0.0006	2.081e-04;2.081e-04;8.236e-04	8.149e-01;8.149e-01;6.276e-01	0.0222;0.0222;0.9556	0.0196;0.0196;0.9608	t|1e1.1o1|1e2.1o1|i	3	3	0;0;0	chr11	+	60933744-60934488;60934205-60934488;60934206-60934337	60933542-60933744;60933997-60934205;60934338-60934617	60934206-60934337
445	ELAC2	ENSG00000006744.19	ENSG00000006744.19:t:13003450-13003499	-0.0005;0.0005	1.033e-05;1.033e-05	9.115e-01;9.115e-01	0.0179;0.9821	0.0127;0.9873	t|1e1.1o1|i	2	2	0;0	chr17	-	13003499-13004989;13003500-13003505	13003450-13003499;13004989-13005110	13003500-13003505
446	ARSD	ENSG00000006756.16	ENSG00000006756.16:s:2906156-2907984	-0.0006;0.0006	4.929e-04;4.929e-04	7.094e-01;7.094e-01	0.0371;0.9629	0.0286;0.9714	s|1e1.1o1|i	2	2	0;0	chrX	-	2905062-2907424;2905063-2906155	2903972-2905062;2906156-2907984	2905063-2906155
447	LUC7L	ENSG00000007392.17	ENSG00000007392.17:s:228489-228722	0.0004;0.0004;0.0004;-0.0016	1.573e-04;1.573e-04;1.573e-04;1.348e-03	8.665e-01;8.665e-01;8.665e-01;5.843e-01	0.0119;0.0119;0.0119;0.9643	0.0208;0.0208;0.0208;0.9375	s|1e1.1o1|1e2.1o1|2e1.1o1|i	4	3	0;0;0;0	chr16	-	228402-228701;227336-228701;228402-228489;228403-228488	227242-227686;227987-228402;228489-228722	228403-228488
448	LUC7L	ENSG00000007392.17	ENSG00000007392.17:s:228790-229142	0.0003;-0.0003	8.303e-05;8.303e-05	8.381e-01;8.381e-01	0.0179;0.9821	0.0238;0.9762	s|1e1.1o1|i	2	2	0;0	chr16	-	228402-228790;228723-228789	227987-228402;228790-229142	228723-228789
449	LUC7L	ENSG00000007392.17	ENSG00000007392.17:s:229279-229463	-0.0001;-0.0001;-0.0001;0.0004	3.299e-05;3.299e-05;3.299e-05;2.813e-04	9.133e-01;9.133e-01;9.133e-01;6.995e-01	0.0122;0.0122;0.0122;0.9634	0.0111;0.0111;0.0111;0.9667	s|1e1.1o1|1e2.1o1|1e3.1o1|i	4	4	0;0;0;0	chr16	-	228402-229279;227336-229279;208188-229279;229143-229278	208078-208508;227242-227686;227987-228402;229279-229463	229143-229278
450	LUC7L	ENSG00000007392.17	ENSG00000007392.17:t:227242-227686	0.0001;0.0001;0.0001;0.0001;-0.0004	4.192e-06;4.192e-06;4.192e-06;4.192e-06;6.204e-05	9.641e-01;9.641e-01;9.641e-01;9.641e-01;7.942e-01	0.0063;0.0063;0.0063;0.0063;0.9750	0.0078;0.0078;0.0078;0.0078;0.9686	t|1e1.1o1|1e2.1o2|1e3.1o2|1e3.2o2|i	5	4	0;0;0;0;0	chr16	-	227336-229279;227336-228701;227336-228333;227336-227987;227687-227986	227242-227686;227987-228402;228489-228722;229279-229463	227687-227986
451	LUC7L	ENSG00000007392.17	ENSG00000007392.17:t:227987-228402	0.0003;0.0003;0.0003;0.0003;-0.0018	1.123e-04;1.123e-04;1.123e-04;1.123e-04;1.577e-03	8.952e-01;8.952e-01;8.952e-01;8.952e-01;5.598e-01	0.0095;0.0095;0.0095;0.0095;0.9619	0.0167;0.0167;0.0167;0.0167;0.9333	t|1e1.1o1|1e2.1o1|1e3.1o2|1e3.2o2|i	5	4	0;0;0;0;0	chr16	-	228402-229279;228402-228790;228402-228701;228402-228489;228403-228488	227987-228402;228489-228722;228790-229142;229279-229463	228403-228488
452	CELSR3	ENSG00000008300.17	ENSG00000008300.17:s:48642358-48642467	0.0002;-0.0002	1.114e-03;1.114e-03	6.287e-01;6.287e-01	0.0401;0.9599	0.0458;0.9542	s|1e1.1o1|i	2	2	0;0	chr3	-	48642009-48642358;48642138-48642357	48641851-48642137;48642358-48642467	48642138-48642357
453	RPS20	ENSG00000008988.11	ENSG00000008988.11:s:56070543-56073272	0.0001;0.0001;0.0001;-0.0003	6.448e-07;6.448e-07;6.448e-07;5.987e-06	9.806e-01;9.806e-01;9.806e-01;9.072e-01	0.0054;0.0054;0.0054;0.9839	0.0067;0.0067;0.0067;0.9800	s|1e1.1o1|2e2.1o1|3e3.2o3|i	4	4	0;0;0;0	chr8	-	56069833-56073117;56069380-56072668;56068344-56070543;56069834-56070542	56067611-56068530;56068811-56069380;56069593-56069833;56070543-56073272	56069834-56070542
454	RPS20	ENSG00000008988.11	ENSG00000008988.11:s:56074060-56074159	-0.0003;-0.0003;0.0007	3.273e-04;3.273e-04;1.291e-03	7.838e-01;7.838e-01;5.810e-01	0.0247;0.0247;0.9505	0.0222;0.0222;0.9556	s|1e1.1o1|1e2.1o1|i	3	3	0;0;0	chr8	-	56073768-56074060;56073272-56074060;56073769-56074059	56070543-56073272;56073316-56073768;56074060-56074159	56073769-56074059
455	RPS20	ENSG00000008988.11	ENSG00000008988.11:s:56074381-56074510	-0.0004;-0.0004;-0.0004;0.0017	1.235e-05;1.235e-05;1.235e-05;1.088e-04	9.509e-01;9.509e-01;9.509e-01;8.016e-01	0.0116;0.0116;0.0116;0.9651	0.0051;0.0051;0.0051;0.9848	s|1e1.1o2|1e1.2o2|1e2.1o1|i	4	3	0;0;0;0	chr8	-	56074159-56074381;56074150-56074381;56073768-56074381;56074357-56074380	56073316-56073768;56074060-56074159;56074381-56074510	56074357-56074380
456	RPS20	ENSG00000008988.11	ENSG00000008988.11:t:56073316-56073768	-0.0003;-0.0003;0.0007	3.273e-04;3.273e-04;1.291e-03	7.838e-01;7.838e-01;5.810e-01	0.0247;0.0247;0.9505	0.0222;0.0222;0.9556	t|1e1.1o1|1e2.1o1|i	3	3	0;0;0	chr8	-	56073768-56074381;56073768-56074060;56073769-56074059	56073316-56073768;56074060-56074159;56074381-56074510	56073769-56074059
457	FYN	ENSG00000010810.17	ENSG00000010810.17:s:111873270-111873452	-0.0002;0.0002	1.217e-07;1.217e-07	9.795e-01;9.795e-01	0.0106;0.9894	0.0063;0.9937	s|1e1.1o1|i	2	2	0;0	chr6	-	111873205-111873270;111873206-111873269	111872968-111873205;111873270-111873452	111873206-111873269
458	PTBP1	ENSG00000011304.22	ENSG00000011304.22:t:808650-808762	-0.0000;0.0000	1.050e-10;1.231e-10	9.973e-01;9.973e-01	0.0057;0.9943	0.0048;0.9952	t|1e1.1o1|i	2	2	0;0	chr19	+	804208-808650;808647-808649	804036-804208;808650-808762	808647-808649
459	CSDE1	ENSG00000009307.17	ENSG00000009307.17:s:114749974-114750207	-0.0000;-0.0000;0.0001	3.474e-11;3.474e-11;1.964e-10	9.987e-01;9.987e-01;9.957e-01	0.0040;0.0040;0.9919	0.0022;0.0022;0.9956	s|1e1.1o1|2e2.1o1|i	3	3	0;0;0	chr1	-	114749904-114750149;114739725-114749974;114749905-114749973	114739692-114739725;114749817-114749904;114749974-114750207	114749905-114749973
460	CSDE1	ENSG00000009307.17	ENSG00000009307.17:t:114720539-114720566	-0.0000;0.0000	2.247e-21;2.043e-21	1.000e+00;1.000e+00	0.0022;0.9978	0.0011;0.9989	t|1e1.1o1|i	2	2	0;0	chr1	-	114720566-114723883;114720567-114720577	114720539-114720566;114723883-114724287	114720567-114720577
461	CSDE1	ENSG00000009307.17	ENSG00000009307.17:t:114739692-114739725	-0.0000;0.0000	2.248e-21;4.874e-14	9.996e-01;9.996e-01	0.0042;0.9958	0.0020;0.9980	t|1e1.2o2|i	2	2	0;0	chr1	-	114739725-114749974;114739726-114739752	114739692-114739725;114749974-114750207	114739726-114739752
462	NISCH	ENSG00000010322.16	ENSG00000010322.16:s:52480139-52480295	-0.0004;-0.0004;0.0009	3.940e-04;3.940e-04;1.552e-03	7.686e-01;7.686e-01;5.594e-01	0.0278;0.0278;0.9444	0.0230;0.0230;0.9540	s|1e1.1o1|1e2.1o1|i	3	3	0;0;0	chr3	+	52480295-52480879;52480295-52484513;52480296-52480878	52480139-52480295;52480879-52481914;52484204-52484637	52480296-52480878
463	CLCN6	ENSG00000011021.23	ENSG00000011021.23:s:11840143-11840371	-0.0005;0.0005	1.522e-05;1.522e-05	9.071e-01;9.071e-01	0.0185;0.9815	0.0122;0.9878	s|1e1.1o1|i	2	2	0;0	chr1	+	11840371-11841058;11840372-11841016	11840143-11840371;11841017-11843143	11840372-11841016
464	COX15	ENSG00000014919.13	ENSG00000014919.13:t:99710868-99713479	0.0000;-0.0000	9.584e-05;9.584e-05	8.211e-01;8.211e-01	0.0227;0.9773	0.0238;0.9762	t|1e1.1o1|i	2	2	0;0	chr10	-	99713479-99716348;99713480-99714651	99710868-99713479;99716348-99716646	99713480-99714651
465	RB1CC1	ENSG00000023287.13	ENSG00000023287.13:t:52622458-52623471	-0.0001;0.0001	9.711e-09;9.792e-09	9.897e-01;9.897e-01	0.0081;0.9919	0.0056;0.9944	t|1e1.1o2|i	2	2	0;0	chr8	-	52623471-52686946;52623472-52623583	52622458-52623471;52686853-52686967	52623472-52623583
466	SNX1	ENSG00000028528.15	ENSG00000028528.15:s:64118117-64118166	-0.0000;0.0000	1.496e-07;1.497e-07	9.716e-01;9.716e-01	0.0098;0.9902	0.0102;0.9898	s|1e1.1o1|i	2	2	0;0	chr15	+	64118166-64145626;64118167-64118202	64118117-64118166;64145626-64146090	64118167-64118202
467	SNX1	ENSG00000028528.15	ENSG00000028528.15:t:64118203-64118244	-0.0000;0.0000	1.496e-07;1.497e-07	9.716e-01;9.716e-01	0.0098;0.9902	0.0102;0.9898	t|1e1.1o1|i	2	2	0;0	chr15	+	64112684-64118203;64118167-64118202	64112573-64112684;64118203-64118244	64118167-64118202
468	LRRC7	ENSG00000033122.21	ENSG00000033122.21:s:70128538-70128795	0.0002;0.0002;-0.0005	8.771e-06;8.771e-06;3.641e-05	9.368e-01;9.368e-01;8.446e-01	0.0095;0.0095;0.9810	0.0139;0.0139;0.9722	s|1e1.1o1|1e2.1o1|i	3	3	0;0;0	chr1	+	70128795-70130128;70128795-70138110;70128796-70130127	70128538-70128795;70130128-70130256;70138110-70138284	70128796-70130127
469	LRRC7	ENSG00000033122.21	ENSG00000033122.21:s:70130128-70130256	0.0002;0.0002;-0.0005	1.040e-05;1.040e-05;4.305e-05	9.312e-01;9.312e-01;8.331e-01	0.0100;0.0100;0.9801	0.0145;0.0145;0.9710	s|1e1.1o1|1e2.1o1|i	3	3	0;0;0	chr1	+	70130256-70132203;70130256-70138110;70130257-70132202	70130128-70130256;70132203-70132288;70138110-70138284	70130257-70132202
470	LRRC7	ENSG00000033122.21	ENSG00000033122.21:s:70138110-70138284	0.0001;0.0001;0.0001;-0.0003	4.142e-06;4.142e-06;4.142e-06;3.709e-05	9.609e-01;9.609e-01;9.609e-01;8.357e-01	0.0070;0.0070;0.0070;0.9789	0.0086;0.0086;0.0086;0.9741	s|1e1.1o2|1e1.2o2|1e2.1o1|i	4	3	0;0;0;0	chr1	+	70138284-70140349;70138284-70140543;70138284-70142197;70138285-70140348	70138110-70138284;70140349-70140614;70141382-70144364	70138285-70140348
471	LRRC7	ENSG00000033122.21	ENSG00000033122.21:t:70141382-70144364	0.0002;0.0002;-0.0004	3.057e-06;3.057e-06;1.288e-05	9.568e-01;9.568e-01;8.880e-01	0.0081;0.0081;0.9837	0.0115;0.0115;0.9770	t|1e1.1o1|1e2.1o1|i	3	3	0;0;0	chr1	+	70138284-70142197;70140614-70142197;70140615-70141381	70138110-70138284;70140349-70140614;70141382-70144364	70140615-70141381
472	VCAN	ENSG00000038427.16	ENSG00000038427.16:s:83579980-83580162	0.0008;-0.0008	3.612e-04;3.612e-04	7.596e-01;7.596e-01	0.0208;0.9792	0.0349;0.9651	s|1e1.1o1|i	2	2	0;0	chr5	+	83580162-83580307;83580163-83580306	83579980-83580162;83580307-83582303	83580163-83580306
473	MAP4	ENSG00000047849.22	ENSG00000047849.22:s:48088964-48089272	-0.0006;0.0006	1.491e-04;1.491e-04	8.044e-01;8.044e-01	0.0263;0.9737	0.0204;0.9796	s|1e1.1o1|i	2	2	0;0	chr3	-	47998879-48088964;48088842-48088963	47998638-47998879;48088964-48089272	48088842-48088963
474	JKAMP	ENSG00000050130.18	ENSG00000050130.18:s:59484443-59484593	-0.0001;-0.0001;-0.0001;-0.0001;-0.0001;-0.0001;0.0013	1.293e-04;1.293e-04;1.293e-04;1.293e-04;1.293e-04;1.293e-04;3.249e-03	8.962e-01;8.962e-01;8.962e-01;8.962e-01;8.962e-01;8.962e-01;4.479e-01	0.0131;0.0131;0.0131;0.0131;0.0131;0.0131;0.9214	0.0102;0.0102;0.0102;0.0102;0.0102;0.0102;0.9388	s|1e1.1o1|1e2.1o1|1e3.1o3|1e3.2o3|1e3.3o3|1e4.1o1|i	7	5	0;0;0;0;0;0;0	chr14	+	59484593-59484990;59484593-59485465;59484593-59486681;59484593-59486713;59484593-59486731;59484593-59487674;59484594-59484989	59484443-59484593;59484990-59485116;59485465-59485968;59486681-59486804;59487194-59487828	59484594-59484989
475	MSMO1	ENSG00000052802.13	ENSG00000052802.13:s:165327667-165327764	-0.0007;-0.0007;0.0017	1.943e-04;1.943e-04;7.730e-04	8.282e-01;8.282e-01;6.463e-01	0.0256;0.0256;0.9487	0.0139;0.0139;0.9722	s|1e1.1o1|1e2.1o1|i	3	3	0;0;0	chr4	+	165327764-165333340;165327764-165337789;165327765-165327926	165327667-165327764;165333340-165333625;165337789-165337937	165327765-165327926
476	ARID4B	ENSG00000054267.22	ENSG00000054267.22:s:235327936-235328219	-0.0001;0.0001	5.899e-07;5.899e-07	9.575e-01;9.575e-01	0.0123;0.9877	0.0106;0.9894	s|1e1.1o1|i	2	2	0;0	chr1	-	235326968-235327936;235327864-235327935	235326791-235326968;235327936-235328219	235327864-235327935
477	RC3H2	ENSG00000056586.16	ENSG00000056586.16:s:122865624-122865657	-0.0001;0.0001	5.613e-08;5.617e-08	9.786e-01;9.786e-01	0.0098;0.9902	0.0083;0.9917	s|1e1.1o1|i	2	2	0;0	chr9	-	122865541-122865624;122865542-122865623	122865349-122865541;122865624-122865657	122865542-122865623
478	GOLGA3	ENSG00000090615.16	ENSG00000090615.16:s:132772693-132773294	-0.0003;0.0003	1.233e-05;1.233e-05	9.043e-01;9.043e-01	0.0179;0.9821	0.0137;0.9863	s|1e1.1o1|i	2	2	0;0	chr12	-	132770524-132772693;132772533-132772692	132768902-132770524;132772693-132773294	132772533-132772692
479	GOLGA3	ENSG00000090615.16	ENSG00000090615.16:t:132768902-132770524	-0.0002;-0.0002;-0.0002;0.0007	5.981e-06;5.981e-06;5.981e-06;5.301e-05	9.547e-01;9.547e-01;9.547e-01;8.155e-01	0.0098;0.0098;0.0098;0.9706	0.0076;0.0076;0.0076;0.9773	t|1e1.1o1|1e2.1o1|1e3.1o1|i	4	4	0;0;0;0	chr12	-	132770524-132774157;132770524-132772693;132770524-132771452;132770525-132771451	132768902-132770524;132771452-132772532;132772693-132773294;132774157-132774320	132770525-132771451
480	DLL3	ENSG00000090932.11	ENSG00000090932.11:s:39507830-39507914	-0.0006;0.0006	6.156e-04;6.156e-04	6.903e-01;6.903e-01	0.0357;0.9643	0.0312;0.9688	s|1e1.1o1|i	2	2	0;0	chr19	+	39507914-39508252;39507915-39508251	39507830-39507914;39508252-39508481	39507915-39508251
481	SORBS1	ENSG00000095637.23	ENSG00000095637.23:t:95414494-95414655	0.0001;-0.0001	1.022e-03;1.022e-03	6.387e-01;6.387e-01	0.0385;0.9615	0.0385;0.9615	t|1e1.1o1|i	2	2	0;0	chr10	-	95414655-95421961;95414656-95414743	95414494-95414655;95421961-95422073	95414656-95414743
482	APEX1	ENSG00000100823.12	ENSG00000100823.12:s:20455245-20455428	-0.0000;-0.0000;-0.0000;-0.0000;-0.0000;-0.0000;-0.0000;-0.0000;-0.0000;-0.0000;0.0005	8.261e-06;8.261e-06;8.261e-06;8.261e-06;8.261e-06;8.261e-06;8.261e-06;8.261e-06;8.261e-06;8.261e-06;4.531e-04	9.724e-01;9.724e-01;9.724e-01;9.724e-01;9.724e-01;9.724e-01;9.724e-01;9.724e-01;9.724e-01;9.724e-01;6.405e-01	0.0042;0.0042;0.0042;0.0042;0.0042;0.0042;0.0042;0.0042;0.0042;0.0042;0.9577	0.0041;0.0041;0.0041;0.0041;0.0041;0.0041;0.0041;0.0041;0.0041;0.0041;0.9587	s|1e1.1o1|2e1.1o1|2e2.1o2|2e3.1o1|3e1.1o1|4e1.1o1|4e2.2o2|4e3.1o1|5e1.1o1|6e1.1o1|i	11	4	0;0;0;0;0;0;0;0;0;0;0	chr14	+	20455328-20455578;20455338-20455578;20455338-20455735;20455338-20455914;20455389-20455578;20455394-20455578;20455394-20455738;20455394-20455914;20455401-20455578;20455428-20455578;20455429-20455577	20455245-20455428;20455578-20455703;20455735-20455773;20455914-20456101	20455429-20455577
483	APEX1	ENSG00000100823.12	ENSG00000100823.12:t:20455578-20455703	-0.0000;-0.0000;-0.0000;-0.0000;-0.0000;-0.0000;-0.0000;0.0005	1.233e-05;1.233e-05;1.233e-05;1.233e-05;1.233e-05;1.233e-05;1.233e-05;4.111e-04	9.610e-01;9.610e-01;9.610e-01;9.610e-01;9.610e-01;9.610e-01;9.610e-01;6.536e-01	0.0058;0.0058;0.0058;0.0058;0.0058;0.0058;0.0058;0.9593	0.0057;0.0057;0.0057;0.0057;0.0057;0.0057;0.0057;0.9602	t|1e1.1o1|1e2.1o6|1e2.2o6|1e2.3o6|1e2.4o6|1e2.5o6|1e2.6o6|i	8	3	0;0;0;0;0;0;0;0	chr14	+	20455240-20455578;20455328-20455578;20455338-20455578;20455389-20455578;20455394-20455578;20455401-20455578;20455428-20455578;20455429-20455577	20455191-20455240;20455245-20455428;20455578-20455703	20455429-20455577
484	APEX1	ENSG00000100823.12	ENSG00000100823.12:t:20457060-20457074	-0.0000;0.0000	1.921e-10;2.286e-10	9.962e-01;9.962e-01	0.0064;0.9936	0.0047;0.9953	t|1e1.1o1|i	2	2	0;0	chr14	+	20456860-20457060;20457003-20457059	20456668-20456860;20457060-20457074	20457003-20457059
485	APEX1	ENSG00000100823.12	ENSG00000100823.12:t:20457078-20457119	-0.0000;0.0000	2.094e-10;2.286e-10	9.965e-01;9.965e-01	0.0062;0.9938	0.0046;0.9954	t|1e1.1o1|i	2	2	0;0	chr14	+	20456860-20457078;20457075-20457077	20456668-20456860;20457078-20457119	20457075-20457077
486	EFS	ENSG00000100842.13	ENSG00000100842.13:s:23359923-23360039	-0.0003;0.0003	1.172e-06;1.172e-06	9.584e-01;9.584e-01	0.0132;0.9868	0.0085;0.9915	s|1e1.1o1|i	2	2	0;0	chr14	-	23359694-23359923;23359695-23359922	23359317-23359694;23359923-23360039	23359695-23359922
487	SPG11	ENSG00000104133.16	ENSG00000104133.16:s:44584165-44584558	0.0001;-0.0001	1.577e-05;1.577e-05	8.945e-01;8.945e-01	0.0156;0.9844	0.0185;0.9815	s|1e1.1o1|i	2	2	0;0	chr15	-	44583935-44584165;44583936-44584164	44583814-44583935;44584165-44584558	44583936-44584164
488	SPG11	ENSG00000104133.16	ENSG00000104133.16:s:44610918-44610985	-0.0002;0.0002	2.691e-05;2.691e-05	8.734e-01;8.734e-01	0.0192;0.9808	0.0179;0.9821	s|1e1.1o1|i	2	2	0;0	chr15	-	44608605-44610918;44610858-44610917	44608444-44608605;44610918-44610985	44610858-44610917
489	MCM4	ENSG00000104738.18	ENSG00000104738.18:s:47977293-47977601	-0.0003;0.0003	1.013e-05;1.013e-05	9.079e-01;9.079e-01	0.0185;0.9815	0.0139;0.9861	s|1e1.1o1|i	2	2	0;0	chr8	+	47977601-47977737;47977602-47977736	47977293-47977601;47977737-47978160	47977602-47977736
490	CORO1C	ENSG00000110880.11	ENSG00000110880.11:s:108646989-108647522	-0.0000;0.0000	1.922e-10;1.890e-10	9.974e-01;9.974e-01	0.0058;0.9942	0.0039;0.9961	s|1e1.1o1|i	2	2	0;0	chr12	-	108646645-108647401;108646646-108646988	108645109-108646645;108646989-108647522	108646646-108646988
491	GPSM2	ENSG00000121957.15	ENSG00000121957.15:s:108929701-108930711	-0.0001;0.0001	5.943e-05;5.943e-05	8.410e-01;8.410e-01	0.0213;0.9787	0.0213;0.9787	s|1e1.1o1|i	2	2	0;0	chr1	+	108929975-108931313;108930712-108931312	108929701-108930711;108931313-108934545	108930712-108931312
492	L3HYPDH	ENSG00000126790.12	ENSG00000126790.12:s:59483809-59484408	-0.0010;0.0010	1.239e-03;1.239e-03	6.248e-01;6.248e-01	0.0455;0.9545	0.0357;0.9643	s|1e1.1o1|i	2	2	0;0	chr14	-	59479351-59483809;59483686-59483808	59478726-59479351;59483809-59484408	59483686-59483808
493	INTS11	ENSG00000127054.22	ENSG00000127054.22:s:1312787-1312949	0.0001;-0.0001	3.923e-04;3.923e-04	7.237e-01;7.237e-01	0.0312;0.9688	0.0357;0.9643	s|1e1.1o1|i	2	2	0;0	chr1	-	1312700-1312787;1312701-1312786	1312593-1312700;1312787-1312949	1312701-1312786
494	INTS11	ENSG00000127054.22	ENSG00000127054.22:s:1313035-1313124	-0.0004;0.0004	2.223e-04;2.223e-04	7.738e-01;7.738e-01	0.0270;0.9730	0.0238;0.9762	s|1e1.1o1|i	2	2	0;0	chr1	-	1312949-1313035;1312950-1313034	1312787-1312949;1313035-1313124	1312950-1313034
495	INTS11	ENSG00000127054.22	ENSG00000127054.22:s:1313509-1313592	-0.0006;0.0006	7.219e-04;7.219e-04	6.736e-01;6.736e-01	0.0401;0.9599	0.0312;0.9688	s|1e1.1o1|i	2	2	0;0	chr1	-	1313124-1313509;1313125-1313508	1313035-1313124;1313509-1313592	1313125-1313508
496	INTS11	ENSG00000127054.22	ENSG00000127054.22:s:1314824-1314962	-0.0002;-0.0002;0.0004	1.815e-04;1.815e-04;7.181e-04	8.203e-01;8.203e-01;6.364e-01	0.0230;0.0230;0.9540	0.0185;0.0185;0.9630	s|1e1.1o1|1e2.2o2|i	3	3	0;0;0	chr1	-	1314365-1314824;1313921-1314824;1314665-1314823	1313732-1314105;1314136-1314365;1314824-1314962	1314665-1314823
497	GSK3A	ENSG00000105723.13	ENSG00000105723.13:s:42242316-42242625	-0.0003;-0.0003;0.0008	8.327e-05;8.327e-05;3.323e-04	8.638e-01;8.638e-01;7.072e-01	0.0196;0.0196;0.9608	0.0152;0.0152;0.9697	s|1e1.1o1|2e2.1o1|i	3	3	0;0;0	chr19	-	42242239-42242372;42240142-42242316;42242240-42242315	42239952-42241893;42241901-42242239;42242316-42242625	42242240-42242315
498	GSK3A	ENSG00000105723.13	ENSG00000105723.13:t:42230190-42230499	-0.0000;-0.0000;-0.0000;0.0001	1.189e-09;1.189e-09;1.189e-09;1.356e-08	9.970e-01;9.970e-01;9.970e-01;9.818e-01	0.0039;0.0039;0.0039;0.9883	0.0029;0.0029;0.0029;0.9912	t|1e2.2o2|2e1.1o1|2e2.1o2|i	4	3	0;0;0;0	chr19	-	42230499-42230536;42230391-42232057;42230391-42230679;42230500-42230535	42230190-42230499;42230536-42230867;42232057-42232170	42230500-42230535
499	VAT1	ENSG00000108828.16	ENSG00000108828.16:s:43015899-43016144	-0.0001;0.0001	1.919e-10;2.755e-10	9.962e-01;9.962e-01	0.0068;0.9932	0.0034;0.9966	s|1e1.1o1|i	2	2	0;0	chr17	-	43014873-43015941;43014874-43015898	43014607-43014873;43015899-43016144	43014874-43015898
500	EFTUD2	ENSG00000108883.13	ENSG00000108883.13:t:44883093-44883128	-0.0001;0.0001	8.814e-08;8.821e-08	9.772e-01;9.772e-01	0.0099;0.9901	0.0080;0.9920	t|1e1.1o1|i	2	2	0;0	chr17	-	44883128-44883649;44883129-44883139	44883093-44883128;44883556-44883724	44883129-44883139
501	WSB1	ENSG00000109046.15	ENSG00000109046.15:s:27306782-27306882	-0.0001;-0.0001;0.0001	2.403e-06;2.403e-06;1.025e-05	9.531e-01;9.531e-01;8.799e-01	0.0103;0.0103;0.9795	0.0095;0.0095;0.9810	s|1e1.1o1|1e2.1o1|i	3	3	0;0;0	chr17	+	27306882-27307744;27306882-27309100;27306883-27307743	27306782-27306882;27307744-27308847;27309100-27309272	27306883-27307743
502	WSB1	ENSG00000109046.15	ENSG00000109046.15:t:27309100-27309272	0.0004;-0.0004	1.835e-05;1.835e-05	8.974e-01;8.974e-01	0.0143;0.9857	0.0195;0.9805	t|1e1.1o1|i	2	2	0;0	chr17	+	27306882-27309100;27308848-27309099	27306782-27306882;27309100-27309272	27308848-27309099
503	PCDHB5	ENSG00000113209.9	ENSG00000113209.9:s:141135206-141135289	0.0005;-0.0005	6.698e-04;6.698e-04	6.833e-01;6.833e-01	0.0312;0.9688	0.0417;0.9583	s|1e1.1o1|i	2	2	0;0	chr5	+	141135289-141136642;141135290-141136641	141135206-141135289;141136642-141138615	141135290-141136641
504	IGFBP2	ENSG00000115457.10	ENSG00000115457.10:s:216660557-216660786	0.0002;0.0002;-0.0005	1.628e-04;1.628e-04;6.457e-04	8.271e-01;8.271e-01;6.469e-01	0.0175;0.0175;0.9649	0.0238;0.0238;0.9524	s|1e1.1o2|1e1.2o2|i	3	2	0;0;0	chr2	+	216660786-216661772;216660786-216661858;216660787-216661771	216660557-216660786;216661772-216661998	216660787-216661771
505	DNAJC16	ENSG00000116138.13	ENSG00000116138.13:s:15568159-15568235	-0.0004;-0.0004;0.0010	8.548e-05;8.548e-05;3.415e-04	8.634e-01;8.634e-01;7.064e-01	0.0208;0.0208;0.9583	0.0145;0.0145;0.9710	s|1e1.1o1|1e2.1o1|i	3	3	0;0;0	chr1	+	15568235-15568777;15568235-15569653;15568236-15568776	15568159-15568235;15568777-15568971;15569653-15571733	15568236-15568776
506	DNAJC16	ENSG00000116138.13	ENSG00000116138.13:s:15568777-15568971	-0.0002;0.0002	6.891e-04;6.891e-04	6.901e-01;6.901e-01	0.0345;0.9655	0.0333;0.9667	s|1e1.1o1|i	2	2	0;0	chr1	+	15568971-15574760;15568972-15569652	15568777-15568971;15574760-15575149	15568972-15569652
507	DNAJC16	ENSG00000116138.13	ENSG00000116138.13:t:15569653-15571733	-0.0002;0.0002	6.891e-04;6.891e-04	6.901e-01;6.901e-01	0.0345;0.9655	0.0333;0.9667	t|1e1.1o1|i	2	2	0;0	chr1	+	15568235-15569653;15568972-15569652	15568159-15568235;15569653-15571733	15568972-15569652
508	BCL11A	ENSG00000119866.22	ENSG00000119866.22:s:60460530-60461744	-0.0000;-0.0000;0.0000	1.227e-09;1.227e-09;6.063e-09	9.952e-01;9.952e-01;9.848e-01	0.0049;0.0049;0.9903	0.0046;0.0046;0.9909	s|1e1.1o1|2e1.1o1|i	3	2	0;0;0	chr2	-	60452666-60460682;60452666-60460530;60460457-60460529	60450520-60452666;60460530-60461744	60460457-60460529
509	BCL11A	ENSG00000119866.22	ENSG00000119866.22:s:60461904-60462424	-0.0000;-0.0000;0.0000	2.252e-21;2.252e-21;1.021e-10	9.985e-01;9.985e-01;9.949e-01	0.0037;0.0037;0.9925	0.0036;0.0036;0.9928	s|1e1.1o1|1e2.1o1|i	3	3	0;0;0	chr2	-	60461744-60462282;60452666-60462282;60461745-60461903	60450520-60452666;60460530-60461744;60461904-60462424	60461745-60461903
510	BCL11A	ENSG00000119866.22	ENSG00000119866.22:s:60545918-60546394	0.0001;0.0001;0.0001;0.0001;0.0001;0.0001;0.0001;0.0001;0.0001;-0.0011	2.578e-05;2.578e-05;2.578e-05;2.578e-05;2.578e-05;2.578e-05;2.578e-05;2.578e-05;2.578e-05;1.197e-03	9.554e-01;9.554e-01;9.554e-01;9.554e-01;9.554e-01;9.554e-01;9.554e-01;9.554e-01;9.554e-01;5.543e-01	0.0050;0.0050;0.0050;0.0050;0.0050;0.0050;0.0050;0.0050;0.0050;0.9550	0.0071;0.0071;0.0071;0.0071;0.0071;0.0071;0.0071;0.0071;0.0071;0.9357	s|1e1.1o1|1e2.1o2|1e2.2o2|1e3.1o1|1e4.1o1|1e5.1o1|1e6.1o1|1e7.1o1|1e8.1o1|i	10	9	0;0;0;0;0;0;0;0;0;0	chr2	-	60544391-60545971;60541925-60545971;60541920-60545971;60538549-60545971;60522883-60545971;60508824-60545971;60478239-60545971;60468833-60545971;60462424-60545971;60544392-60545917	60461904-60462424;60468732-60468833;60478164-60478239;60508606-60508824;60522081-60522883;60532860-60538549;60541783-60541925;60544230-60544391;60545918-60546394	60544392-60545917
511	TRIM28	ENSG00000130726.12	ENSG00000130726.12:s:58544457-58544561	-0.0002;0.0002	2.400e-07;2.400e-07	9.789e-01;9.789e-01	0.0100;0.9900	0.0063;0.9937	s|1e1.1o1|i	2	2	0;0	chr19	+	58544561-58544938;58544562-58544937	58544457-58544561;58544938-58545097	58544562-58544937
512	ATP5IF1	ENSG00000130770.18	ENSG00000130770.18:s:28236361-28236452	-0.0001;-0.0001;-0.0001;0.0004	4.487e-05;4.487e-05;4.487e-05;3.801e-04	9.007e-01;9.007e-01;9.007e-01;6.694e-01	0.0132;0.0132;0.0132;0.9605	0.0132;0.0132;0.0132;0.9605	s|1e1.1o2|1e1.2o2|1e2.1o1|i	4	3	0;0;0;0	chr1	+	28236452-28237761;28236452-28237837;28236452-28246589;28236453-28237760	28236361-28236452;28237761-28238105;28246589-28246906	28236453-28237760
513	GFAP	ENSG00000131095.14	ENSG00000131095.14:s:44910092-44910115	0.0009;-0.0009	4.458e-05;4.458e-05	8.904e-01;8.904e-01	0.0098;0.9902	0.0239;0.9761	s|1e1.1o1|i	2	2	0;0	chr17	-	44908149-44910092;44909753-44910091	44908135-44908149;44910092-44910115	44909753-44910091
514	GFAP	ENSG00000131095.14	ENSG00000131095.14:s:44910141-44910260	0.0006;0.0006;-0.0015	1.117e-04;1.117e-04;4.512e-04	8.760e-01;8.760e-01;7.236e-01	0.0106;0.0106;0.9788	0.0215;0.0215;0.9569	s|1e1.1o1|2e1.1o1|i	3	2	0;0;0	chr17	-	44908149-44910226;44908149-44910141;44910116-44910140	44908135-44908149;44910141-44910260	44910116-44910140
515	FUS	ENSG00000089280.19	ENSG00000089280.19:s:31184939-31185179	-0.0000;-0.0000;0.0001	7.475e-06;7.475e-06;3.123e-05	9.314e-01;9.314e-01;8.339e-01	0.0121;0.0121;0.9757	0.0124;0.0124;0.9753	s|1e1.1o1|1e2.1o1|i	3	3	0;0;0	chr16	+	31185179-31186802;31185179-31188325;31185180-31185498	31184939-31185179;31186802-31187245;31188152-31188357	31185180-31185498
516	FUS	ENSG00000089280.19	ENSG00000089280.19:t:31186802-31187245	0.0000;0.0000;-0.0001	7.953e-06;7.953e-06;3.311e-05	9.325e-01;9.325e-01;8.360e-01	0.0111;0.0111;0.9778	0.0123;0.0123;0.9753	t|1e1.1o1|1e2.1o1|i	3	3	0;0;0	chr16	+	31185179-31186802;31185556-31186802;31185557-31186801	31184939-31185179;31185499-31185556;31186802-31187245	31185557-31186801
517	FUS	ENSG00000089280.19	ENSG00000089280.19:t:31188152-31188357	0.0000;0.0000;-0.0000	7.224e-06;7.224e-06;3.011e-05	9.334e-01;9.334e-01;8.381e-01	0.0115;0.0115;0.9770	0.0119;0.0119;0.9762	t|1e1.1o1|1e2.1o1|i	3	3	0;0;0	chr16	+	31185179-31188325;31186836-31188325;31187246-31188151	31184939-31185179;31186802-31187245;31188152-31188357	31187246-31188151
518	SEPTIN3	ENSG00000100167.21	ENSG00000100167.21:s:41994621-41994714	-0.0000;0.0000	2.247e-21;2.043e-21	1.000e+00;1.000e+00	0.0029;0.9971	0.0012;0.9988	s|1e1.1o1|i	2	2	0;0	chr22	+	41994714-41996902;41994715-41996901	41994621-41994714;41996902-41998221	41994715-41996901
519	GGA2	ENSG00000103365.15	ENSG00000103365.15:s:23467432-23467700	0.0001;-0.0001	6.968e-07;6.968e-07	9.606e-01;9.606e-01	0.0096;0.9904	0.0120;0.9880	s|1e1.2o2|i	2	2	0;0	chr16	-	23466778-23467432;23467414-23467431	23466590-23466830;23467432-23467700	23467414-23467431
520	GGA2	ENSG00000103365.15	ENSG00000103365.15:s:23494112-23494402	-0.0001;-0.0001;-0.0001;-0.0001;0.0008	2.575e-04;2.575e-04;2.575e-04;2.575e-04;3.454e-03	8.392e-01;8.392e-01;8.392e-01;8.392e-01;4.452e-01	0.0182;0.0182;0.0182;0.0182;0.9273	0.0182;0.0182;0.0182;0.0182;0.9273	s|1e1.1o3|1e1.2o3|1e1.3o3|2e1.3o3|i	5	2	0;0;0;0;0	chr16	-	23493587-23494303;23493521-23494303;23493458-23494303;23493458-23494299;23493588-23494111	23493360-23493587;23494112-23494402	23493588-23494111
521	GGA2	ENSG00000103365.15	ENSG00000103365.15:t:23463542-23465398	-0.0004;0.0004	1.978e-04;1.978e-04	7.766e-01;7.766e-01	0.0294;0.9706	0.0238;0.9762	t|1e1.1o2|i	2	2	0;0	chr16	-	23465398-23486746;23465399-23466589	23463542-23465398;23486710-23486790	23465399-23466589
522	GGA2	ENSG00000103365.15	ENSG00000103365.15:t:23466590-23466830	-0.0004;-0.0004;0.0011	3.879e-05;3.879e-05;1.569e-04	8.979e-01;8.979e-01;7.677e-01	0.0175;0.0175;0.9649	0.0115;0.0115;0.9770	t|1e2.1o1|2e1.1o1|i	3	3	0;0;0	chr16	-	23466830-23466989;23466778-23467432;23466831-23466988	23466590-23466830;23466989-23467413;23467432-23467700	23466831-23466988
523	UBE2D3	ENSG00000109332.20	ENSG00000109332.20:s:102825478-102825559	0.0001;-0.0001	1.125e-03;1.125e-03	6.326e-01;6.326e-01	0.0371;0.9629	0.0417;0.9583	s|1e1.1o1|i	2	2	0;0	chr4	-	102809855-102825478;102825318-102825477	102809792-102809953;102825478-102825559	102825318-102825477
524	UBE2D3	ENSG00000109332.20	ENSG00000109332.20:t:102809792-102809953	0.0001;0.0001;0.0001;0.0001;0.0001;0.0001;0.0001;-0.0022	1.453e-04;1.453e-04;1.453e-04;1.453e-04;1.453e-04;1.453e-04;1.453e-04;5.792e-03	9.103e-01;9.103e-01;9.103e-01;9.103e-01;9.103e-01;9.103e-01;9.103e-01;3.722e-01	0.0083;0.0083;0.0083;0.0083;0.0083;0.0083;0.0083;0.9417	0.0104;0.0104;0.0104;0.0104;0.0104;0.0104;0.0104;0.9271	t|1e1.1o1|1e2.1o1|1e3.1o2|1e3.2o2|1e4.1o1|1e5.1o1|1e6.1o1|i	8	7	0;0;0;0;0;0;0;0	chr4	-	102809855-102868715;102809855-102826485;102809855-102825738;102809855-102825722;102809855-102825478;102809855-102825239;102809855-102810370;102809954-102810369	102809792-102809953;102810370-102812973;102825239-102825317;102825478-102825559;102825722-102825860;102826485-102827122;102868715-102868896	102809954-102810369
525	UBE2D3	ENSG00000109332.20	ENSG00000109332.20:t:102825239-102825317	0.0001;0.0001;-0.0003	5.233e-04;5.233e-04;2.082e-03	7.501e-01;7.501e-01;5.312e-01	0.0247;0.0247;0.9505	0.0278;0.0278;0.9444	t|1e1.1o2|1e1.2o2|i	3	2	0;0;0	chr4	-	102825317-102825738;102825317-102825722;102825318-102825477	102825239-102825317;102825722-102825860	102825318-102825477
526	SRSF9	ENSG00000111786.9	ENSG00000111786.9:t:120463950-120464122	0.0001;0.0001;0.0001;-0.0003	2.631e-04;2.631e-04;2.631e-04;2.185e-03	8.211e-01;8.211e-01;8.211e-01;5.058e-01	0.0179;0.0179;0.0179;0.9464	0.0208;0.0208;0.0208;0.9375	t|1e1.1o2|1e1.2o2|1e2.1o1|i	4	3	0;0;0;0	chr12	-	120464122-120465756;120464122-120465627;120464122-120464733;120464123-120464732	120463950-120464122;120464733-120464943;120465139-120465787	120464123-120464732
527	OGG1	ENSG00000114026.22	ENSG00000114026.22:t:9759187-9762324	-0.0000;-0.0000;0.0000	1.458e-04;1.458e-04;5.779e-04	8.306e-01;8.306e-01;6.531e-01	0.0196;0.0196;0.9608	0.0208;0.0208;0.9583	t|1e1.1o1|2e1.1o1|i	3	2	0;0;0	chr3	+	9756816-9759187;9756816-9759234;9757408-9759186	9756767-9757035;9759187-9762324	9757408-9759186
528	RPAIN	ENSG00000129197.15	ENSG00000129197.15:s:5425971-5426082	-0.0002;-0.0002;-0.0002;0.0009	7.337e-05;7.337e-05;7.337e-05;6.151e-04	8.855e-01;8.855e-01;8.855e-01;6.338e-01	0.0167;0.0167;0.0167;0.9500	0.0132;0.0132;0.0132;0.9604	s|1e1.1o1|1e2.1o1|1e3.1o1|i	4	4	0;0;0;0	chr17	+	5426082-5426236;5426082-5428071;5426082-5432542;5426083-5426235	5425971-5426082;5426236-5426299;5428071-5431484;5432542-5432877	5426083-5426235
529	RPAIN	ENSG00000129197.15	ENSG00000129197.15:s:5426236-5426299	-0.0001;-0.0001;0.0003	1.660e-04;1.660e-04;6.575e-04	8.223e-01;8.223e-01;6.403e-01	0.0208;0.0208;0.9583	0.0202;0.0202;0.9596	s|1e1.1o1|1e2.1o1|i	3	3	0;0;0	chr17	+	5426299-5428071;5426299-5432542;5426300-5428070	5426236-5426299;5428071-5431484;5432542-5432877	5426300-5428070
530	RPAIN	ENSG00000129197.15	ENSG00000129197.15:t:5426236-5426299	-0.0003;-0.0003;0.0007	1.178e-04;1.178e-04;4.679e-04	8.428e-01;8.428e-01;6.728e-01	0.0222;0.0222;0.9556	0.0176;0.0176;0.9648	t|1e1.1o1|1e2.1o1|i	3	3	0;0;0	chr17	+	5422829-5426236;5426082-5426236;5426083-5426235	5422769-5423069;5425971-5426082;5426236-5426299	5426083-5426235
531	RPAIN	ENSG00000129197.15	ENSG00000129197.15:t:5428071-5431484	-0.0001;-0.0001;-0.0001;0.0004	1.034e-04;1.034e-04;1.034e-04;8.627e-04	8.696e-01;8.696e-01;8.696e-01;6.000e-01	0.0156;0.0156;0.0156;0.9531	0.0152;0.0152;0.0152;0.9545	t|1e1.1o1|1e2.1o1|1e3.1o1|i	4	4	0;0;0;0	chr17	+	5422829-5428071;5426082-5428071;5426299-5428071;5426300-5428070	5422769-5423069;5425971-5426082;5426236-5426299;5428071-5431484	5426300-5428070
532	NIPA2	ENSG00000140157.16	ENSG00000140157.16:t:22851709-22851870	-0.0002;0.0002	1.289e-07;1.290e-07	9.794e-01;9.794e-01	0.0104;0.9896	0.0060;0.9940	t|1e1.1o1|i	2	2	0;0	chr15	+	22845267-22851709;22851677-22851708	22845146-22845267;22851709-22851870	22851677-22851708
533	PABPN1	ENSG00000100836.11	ENSG00000100836.11:s:23324138-23324645	-0.0001;-0.0001;0.0003	5.906e-07;5.906e-07;2.560e-06	9.726e-01;9.726e-01;9.250e-01	0.0086;0.0086;0.9829	0.0070;0.0070;0.9860	s|1e1.1o1|2e1.1o1|i	3	2	0;0;0	chr14	+	23324289-23325247;23324328-23325247;23324646-23325246	23324138-23324645;23325247-23326163	23324646-23325246
534	CENPT	ENSG00000102901.13	ENSG00000102901.13:s:67830390-67830692	-0.0004;0.0004	2.321e-04;2.321e-04	7.670e-01;7.670e-01	0.0294;0.9706	0.0244;0.9756	s|1e1.1o1|i	2	2	0;0	chr16	-	67830088-67830390;67830254-67830389	67829765-67830253;67830390-67830692	67830254-67830389
535	CENPT	ENSG00000102901.13	ENSG00000102901.13:s:67831841-67831890	0.0001;-0.0001	3.180e-06;3.180e-06	9.351e-01;9.351e-01	0.0127;0.9873	0.0143;0.9857	s|1e1.1o1|i	2	2	0;0	chr16	-	67831358-67831841;67831841-67831840	67830905-67831358;67831754-67831840;67831841-67831890	67831841-67831840
536	CENPT	ENSG00000102901.13	ENSG00000102901.13:t:67831754-67831840	0.0001;-0.0001	3.180e-06;3.180e-06	9.351e-01;9.351e-01	0.0127;0.9873	0.0143;0.9857	t|1e1.1o1|i	2	2	0;0	chr16	-	67831840-67832012;67831841-67831840	67831754-67831840;67831841-67831890;67832012-67832136	67831841-67831840
537	HNRNPL	ENSG00000104824.18	ENSG00000104824.18:s:38840488-38840559	-0.0001;0.0001	2.635e-08;2.649e-08	9.835e-01;9.835e-01	0.0096;0.9904	0.0069;0.9931	s|1e1.1o1|i	2	2	0;0	chr19	-	38840376-38840488;38840377-38840487	38840303-38840376;38840488-38840559	38840377-38840487
538	HNRNPL	ENSG00000104824.18	ENSG00000104824.18:t:38840488-38840559	-0.0002;-0.0002;0.0004	9.046e-05;9.046e-05;3.614e-04	8.593e-01;8.593e-01;6.998e-01	0.0180;0.0180;0.9639	0.0167;0.0167;0.9667	t|1e1.1o1|1e2.1o1|i	3	3	0;0;0	chr19	-	38840559-38843842;38840559-38841613;38840560-38841612	38840488-38840559;38841613-38842328;38843371-38843914	38840560-38841612
539	HNRNPUL1	ENSG00000105323.18	ENSG00000105323.18:s:41264372-41264692	-0.0000;-0.0000;-0.0000;0.0000	2.247e-21;2.247e-21;2.247e-21;4.774e-15	1.000e+00;1.000e+00;1.000e+00;9.997e-01	0.0017;0.0017;0.0017;0.9949	0.0012;0.0012;0.0012;0.9963	s|1e1.1o1|2e2.1o1|2e3.1o1|i	4	4	0;0;0;0	chr19	+	41264605-41264735;41264692-41268223;41264692-41291879;41264693-41264734	41264372-41264692;41264735-41264798;41268078-41268345;41291879-41291884	41264693-41264734
540	BABAM1	ENSG00000105393.16	ENSG00000105393.16:s:17268685-17268938	-0.0001;0.0001	7.244e-08;7.245e-08	9.784e-01;9.784e-01	0.0095;0.9905	0.0075;0.9925	s|1e1.1o1|i	2	2	0;0	chr19	+	17268938-17269042;17268939-17268996	17268685-17268938;17268997-17269091	17268939-17268996
541	BABAM1	ENSG00000105393.16	ENSG00000105393.16:s:17276428-17276624	0.0000;-0.0000	1.325e-03;1.325e-03	6.101e-01;6.101e-01	0.0417;0.9583	0.0455;0.9545	s|1e1.1o1|i	2	2	0;0	chr19	+	17276624-17276823;17276625-17276813	17276428-17276624;17276814-17276909	17276625-17276813
542	BABAM1	ENSG00000105393.16	ENSG00000105393.16:t:17279037-17279342	-0.0001;0.0001	7.646e-07;7.646e-07	9.644e-01;9.644e-01	0.0106;0.9894	0.0098;0.9902	t|1e1.1o2|i	2	2	0;0	chr19	+	17273980-17279037;17278985-17279036	17273904-17274024;17279037-17279342	17278985-17279036
543	MTCH2	ENSG00000109919.10	ENSG00000109919.10:t:47617315-47617539	-0.0000;0.0000	1.647e-06;1.647e-06	9.409e-01;9.409e-01	0.0130;0.9870	0.0128;0.9872	t|1e1.1o1|i	2	2	0;0	chr11	-	47617539-47634672;47617540-47618703	47617315-47617539;47634672-47634734	47617540-47618703
544	PPP6R3	ENSG00000110075.15	ENSG00000110075.15:t:68614632-68615334	0.0004;-0.0004	3.153e-05;3.153e-05	8.842e-01;8.842e-01	0.0147;0.9853	0.0206;0.9794	t|1e1.1o1|i	2	2	0;0	chr11	+	68610023-68614632;68614593-68614631	68609775-68610023;68614632-68615334	68614593-68614631
545	UBE3A	ENSG00000114062.22	ENSG00000114062.22:s:25408572-25408713	0.0000;0.0000;0.0000;0.0000;0.0000;0.0000;-0.0002	8.178e-05;8.178e-05;8.178e-05;8.178e-05;8.178e-05;8.178e-05;2.089e-03	9.136e-01;9.136e-01;9.136e-01;9.136e-01;9.136e-01;9.136e-01;4.990e-01	0.0099;0.0099;0.0099;0.0099;0.0099;0.0099;0.9408	0.0102;0.0102;0.0102;0.0102;0.0102;0.0102;0.9388	s|1e1.1o4|1e1.2o4|1e1.3o4|1e1.4o4|1e2.1o1|2e1.1o4|i	7	3	0;0;0;0;0;0;0	chr15	-	25407262-25408620;25407228-25408620;25407212-25408620;25407137-25408620;25405502-25408620;25407262-25408572;25407263-25408571	25405461-25405603;25407067-25407262;25408572-25408713	25407263-25408571
546	UBE3A	ENSG00000114062.22	ENSG00000114062.22:t:25373889-25375567	-0.0001;0.0001	1.311e-08;1.316e-08	9.888e-01;9.888e-01	0.0089;0.9911	0.0050;0.9950	t|1e1.1o1|i	2	2	0;0	chr15	-	25375567-25405461;25375568-25375579	25373889-25375567;25405461-25405603	25375568-25375579
547	UBE3A	ENSG00000114062.22	ENSG00000114062.22:t:25407067-25407262	0.0000;0.0000;0.0000;0.0000;0.0000;0.0000;-0.0002	8.178e-05;8.178e-05;8.178e-05;8.178e-05;8.178e-05;8.178e-05;2.089e-03	9.136e-01;9.136e-01;9.136e-01;9.136e-01;9.136e-01;9.136e-01;4.990e-01	0.0099;0.0099;0.0099;0.0099;0.0099;0.0099;0.9408	0.0102;0.0102;0.0102;0.0102;0.0102;0.0102;0.9388	t|1e1.1o1|1e2.1o2|1e2.2o2|2e2.1o2|3e2.1o2|4e2.1o2|i	7	3	0;0;0;0;0;0;0	chr15	-	25407262-25409088;25407262-25408620;25407262-25408572;25407228-25408620;25407212-25408620;25407137-25408620;25407263-25408571	25407067-25407262;25408572-25408713;25409088-25409412	25407263-25408571
548	PRKAR2A	ENSG00000114302.16	ENSG00000114302.16:s:48751585-48751718	-0.0002;-0.0002;0.0005	3.906e-07;3.906e-07;1.718e-06	9.793e-01;9.793e-01;9.419e-01	0.0088;0.0088;0.9825	0.0051;0.0051;0.9898	s|1e1.1o1|1e2.1o1|i	3	3	0;0;0	chr3	-	48747940-48751585;48744767-48751585;48751421-48751584	48744597-48744767;48746586-48747940;48751585-48751718	48751421-48751584
549	PRKAR2A	ENSG00000114302.16	ENSG00000114302.16:t:48746586-48747940	-0.0003;0.0003	4.375e-07;4.375e-07	9.668e-01;9.668e-01	0.0122;0.9878	0.0079;0.9921	t|1e1.1o1|i	2	2	0;0	chr3	-	48747940-48751585;48747941-48749647	48746586-48747940;48751585-48751718	48747941-48749647
550	PRKAR2A	ENSG00000114302.16	ENSG00000114302.16:t:48749648-48751420	-0.0003;0.0003	8.776e-07;8.777e-07	9.627e-01;9.627e-01	0.0132;0.9868	0.0076;0.9924	t|1e1.1o1|i	2	2	0;0	chr3	-	48751420-48765248;48751421-48751584	48749648-48751420;48765248-48765350	48751421-48751584
551	MAP7D1	ENSG00000116871.16	ENSG00000116871.16:s:36176199-36176321	-0.0001;0.0001	2.916e-08;2.922e-08	9.853e-01;9.853e-01	0.0092;0.9908	0.0065;0.9935	s|1e1.1o1|i	2	2	0;0	chr1	+	36176321-36176418;36176322-36176417	36176199-36176321;36176418-36176581	36176322-36176417
552	MXI1	ENSG00000119950.21	ENSG00000119950.21:s:110284824-110285337	-0.0002;0.0002	1.054e-07;1.055e-07	9.814e-01;9.814e-01	0.0101;0.9899	0.0059;0.9941	s|1e1.1o1|i	2	2	0;0	chr10	+	110285146-110285642;110285338-110285641	110284824-110285337;110285642-110287365	110285338-110285641
553	DYNLL1	ENSG00000088986.11	ENSG00000088986.11:t:120496402-120497673	-0.0003;-0.0003;-0.0003;-0.0003;-0.0003;0.0021	3.621e-05;3.621e-05;3.621e-05;3.621e-05;3.621e-05;7.217e-04	9.375e-01;9.375e-01;9.375e-01;9.375e-01;9.375e-01;6.295e-01	0.0108;0.0108;0.0108;0.0108;0.0108;0.9462	0.0058;0.0058;0.0058;0.0058;0.0058;0.9708	t|1e4.1o1|2e1.1o1|2e2.1o1|2e3.1o1|2e4.1o1|i	6	5	0;0;0;0;0;0	chr12	+	120496216-120496402;120470104-120496416;120488653-120496416;120495437-120496416;120496216-120496416;120496217-120496401	120469850-120470104;120488578-120488653;120495284-120495437;120496082-120496216;120496402-120497673	120496217-120496401
554	MAPKAPK5	ENSG00000089022.14	ENSG00000089022.14:s:111892967-111893161	-0.0004;0.0004	9.142e-05;9.142e-05	8.315e-01;8.315e-01	0.0244;0.9756	0.0194;0.9806	s|1e1.1o1|i	2	2	0;0	chr12	+	111893022-111893514;111893162-111893513	111892967-111893161;111893514-111893585	111893162-111893513
555	ATP6V1D	ENSG00000100554.12	ENSG00000100554.12:s:67338251-67338762	-0.0001;-0.0001;0.0003	4.819e-08;4.819e-08;2.209e-07	9.895e-01;9.895e-01;9.689e-01	0.0072;0.0072;0.9855	0.0037;0.0037;0.9927	s|1e1.1o1|1e2.1o1|i	3	3	0;0;0	chr14	-	67338152-67338561;67336738-67338561;67338153-67338250	67336188-67336738;67337872-67338152;67338251-67338762	67338153-67338250
556	FZD3	ENSG00000104290.11	ENSG00000104290.11:s:28562798-28563266	-0.0002;0.0002	7.408e-07;7.408e-07	9.634e-01;9.634e-01	0.0118;0.9882	0.0088;0.9912	s|1e1.1o1|i	2	2	0;0	chr8	+	28563266-28563941;28563267-28563940	28562798-28563266;28563941-28574267	28563267-28563940
557	KXD1	ENSG00000105700.11	ENSG00000105700.11:s:18568402-18568720	-0.0002;-0.0002;0.0005	5.360e-06;5.360e-06;2.236e-05	9.448e-01;9.448e-01;8.616e-01	0.0117;0.0117;0.9766	0.0094;0.0094;0.9812	s|1e1.1o1|2e1.1o1|i	3	2	0;0;0	chr19	+	18568679-18568830;18568689-18568830;18568721-18568829	18568402-18568720;18568830-18569387	18568721-18568829
558	BET1	ENSG00000105829.13	ENSG00000105829.13:s:93994352-93994385	-0.0004;-0.0004;0.0011	1.612e-04;1.612e-04;6.410e-04	8.314e-01;8.314e-01;6.532e-01	0.0222;0.0222;0.9556	0.0163;0.0163;0.9675	s|1e1.1o1|1e2.1o1|i	3	3	0;0;0	chr7	-	93993910-93994352;93976100-93994352;93993911-93994351	93975904-93976100;93993245-93993910;93994352-93994385	93993911-93994351
559	RTN4	ENSG00000115310.19	ENSG00000115310.19:t:54973513-54973621	0.0000;0.0000;-0.0001	5.320e-05;5.320e-05;2.142e-04	8.774e-01;8.774e-01;7.315e-01	0.0159;0.0159;0.9683	0.0172;0.0172;0.9656	t|1e1.1o1|1e2.1o1|i	3	3	0;0;0	chr2	-	54973621-54982515;54973621-54973821;54973622-54973820	54973513-54973621;54973821-54974191;54982515-54982653	54973622-54973820
560	RAB3GAP1	ENSG00000115839.19	ENSG00000115839.19:s:135168545-135168749	-0.0003;-0.0003;0.0006	3.314e-05;3.314e-05;1.337e-04	9.039e-01;9.039e-01;7.792e-01	0.0155;0.0155;0.9690	0.0123;0.0123;0.9753	s|1e1.1o1|1e2.1o1|i	3	3	0;0;0	chr2	+	135168749-135169734;135168749-135175327;135168750-135169733	135168545-135168749;135169734-135170710;135175327-135175588	135168750-135169733
561	AKAP7	ENSG00000118507.18	ENSG00000118507.18:t:131282399-131283535	-0.0005;0.0005	2.045e-04;2.045e-04	7.855e-01;7.855e-01	0.0278;0.9722	0.0233;0.9767	t|1e1.1o1|i	2	2	0;0	chr6	+	131219808-131282399;131281944-131282398	131219661-131219808;131282399-131283535	131281944-131282398
562	EXOSC8	ENSG00000120699.14	ENSG00000120699.14:s:37002934-37003007	0.0000;0.0000;0.0000;0.0000;-0.0002	2.404e-04;2.404e-04;2.404e-04;2.404e-04;3.295e-03	8.497e-01;8.497e-01;8.497e-01;8.497e-01;4.602e-01	0.0148;0.0148;0.0148;0.0148;0.9407	0.0167;0.0167;0.0167;0.0167;0.9333	s|1e1.1o1|1e2.1o2|1e2.2o2|1e3.1o2|i	5	4	0;0;0;0;0	chr13	+	37003007-37003495;37003007-37004477;37003007-37004516;37003007-37005920;37003008-37003494	37002934-37003007;37003495-37003517;37004218-37005844;37005865-37006025	37003008-37003494
563	TMPO	ENSG00000120802.14	ENSG00000120802.14:s:98515579-98515814	-0.0001;-0.0001;0.0002	1.676e-08;1.676e-08;7.919e-08	9.907e-01;9.907e-01;9.718e-01	0.0064;0.0064;0.9872	0.0047;0.0047;0.9905	s|1e1.1o2|2e1.2o2|i	3	2	0;0;0	chr12	+	98515785-98515964;98515814-98515971;98515815-98515851	98515579-98515814;98515852-98516146	98515815-98515851
564	ZMYM2	ENSG00000121741.17	ENSG00000121741.17:s:19993063-19993564	-0.0001;0.0001	5.942e-10;6.234e-10	9.949e-01;9.949e-01	0.0070;0.9930	0.0046;0.9954	s|1e1.1o1|i	2	2	0;0	chr13	+	19993564-19993826;19993565-19993825	19993063-19993564;19993826-19993919	19993565-19993825
565	ZMYM2	ENSG00000121741.17	ENSG00000121741.17:t:20026519-20026762	-0.0001;-0.0001;0.0003	8.288e-05;8.288e-05;3.313e-04	8.612e-01;8.612e-01;7.032e-01	0.0180;0.0180;0.9639	0.0167;0.0167;0.9667	t|1e1.1o1|1e2.1o1|i	3	3	0;0;0	chr13	+	20019618-20026612;20025375-20026612;20025376-20026518	20019547-20019963;20024394-20025375;20026519-20026762	20025376-20026518
566	SRSF6	ENSG00000124193.16	ENSG00000124193.16:t:43463344-43464243	-0.0001;-0.0001;0.0002	3.305e-08;3.305e-08;1.526e-07	9.888e-01;9.888e-01;9.666e-01	0.0064;0.0064;0.9872	0.0052;0.0052;0.9895	t|1e1.1o1|1e2.1o1|i	3	3	0;0;0	chr20	+	43460598-43463344;43460852-43463344;43461335-43463343	43460515-43460598;43460703-43461334;43463344-43464243	43461335-43463343
567	NAGK	ENSG00000124357.13	ENSG00000124357.13:s:71070741-71071138	0.0000;0.0000;0.0000;-0.0002	2.576e-04;2.576e-04;2.576e-04;2.122e-03	8.202e-01;8.202e-01;8.202e-01;5.057e-01	0.0192;0.0192;0.0192;0.9423	0.0208;0.0208;0.0208;0.9375	s|1e1.1o1|1e2.2o2|1e3.1o1|i	4	4	0;0;0;0	chr2	+	71070839-71071686;71070839-71072641;71070839-71073482;71071139-71071548	71070741-71071138;71071549-71071827;71072285-71072751;71073482-71073594	71071139-71071548
568	NAGK	ENSG00000124357.13	ENSG00000124357.13:t:71070300-71070619	0.0001;0.0001;0.0001;-0.0005	2.250e-04;2.250e-04;2.250e-04;1.868e-03	8.334e-01;8.334e-01;8.334e-01;5.268e-01	0.0161;0.0161;0.0161;0.9516	0.0192;0.0192;0.0192;0.9423	t|1e1.1o1|1e2.1o1|1e3.1o1|i	4	4	0;0;0;0	chr2	+	71068336-71070502;71068712-71070502;71069061-71070502;71069062-71070299	71068195-71068381;71068588-71068712;71068978-71069061;71070300-71070619	71069062-71070299
569	NAGK	ENSG00000124357.13	ENSG00000124357.13:t:71070741-71071138	0.0004;0.0004;-0.0011	2.858e-04;2.858e-04;1.137e-03	7.975e-01;7.975e-01;5.996e-01	0.0191;0.0191;0.9619	0.0290;0.0290;0.9419	t|1e1.1o1|1e2.1o1|i	3	3	0;0;0	chr2	+	71068712-71070741;71070586-71070741;71070620-71070740	71068588-71068712;71070300-71070619;71070741-71071138	71070620-71070740
570	NAGK	ENSG00000124357.13	ENSG00000124357.13:t:71071549-71071827	0.0000;0.0000;-0.0001	4.136e-04;4.136e-04;1.627e-03	7.598e-01;7.598e-01;5.483e-01	0.0256;0.0256;0.9487	0.0278;0.0278;0.9444	t|1e1.1o1|1e2.1o1|i	3	3	0;0;0	chr2	+	71068712-71071686;71070839-71071686;71071139-71071548	71068588-71068712;71070741-71071138;71071549-71071827	71071139-71071548
571	FGFR1	ENSG00000077782.22	ENSG00000077782.22:t:38410894-38412595	0.0007;-0.0007	3.782e-04;3.782e-04	7.425e-01;7.425e-01	0.0217;0.9783	0.0401;0.9599	t|1e1.1o1|i	2	2	0;0	chr8	-	38412595-38413918;38412596-38412727	38410894-38412595;38413918-38414034	38412596-38412727
572	NOP14	ENSG00000087269.16	ENSG00000087269.16:t:2937933-2938327	-0.0001;-0.0001;-0.0001;-0.0001;0.0009	3.455e-05;3.455e-05;3.455e-05;3.455e-05;4.790e-04	9.227e-01;9.227e-01;9.227e-01;9.227e-01;6.475e-01	0.0114;0.0114;0.0114;0.0114;0.9542	0.0089;0.0089;0.0089;0.0089;0.9644	t|1e1.1o3|1e1.2o3|1e2.1o2|2e3.1o1|i	5	4	0;0;0;0;0	chr4	-	2938327-2939539;2938327-2939535;2938327-2939290;2938188-2938812;2938328-2938811	2937933-2938327;2938812-2938930;2939188-2939343;2939527-2939645	2938328-2938811
573	PPIL2	ENSG00000100023.20	ENSG00000100023.20:s:21695394-21695496	0.0000;0.0000;0.0000;0.0000;0.0000;0.0000;0.0000;0.0000;-0.0002	3.190e-05;3.190e-05;3.190e-05;3.190e-05;3.190e-05;3.190e-05;3.190e-05;3.190e-05;1.247e-03	9.470e-01;9.470e-01;9.470e-01;9.470e-01;9.470e-01;9.470e-01;9.470e-01;9.470e-01;5.461e-01	0.0069;0.0069;0.0069;0.0069;0.0069;0.0069;0.0069;0.0069;0.9444	0.0069;0.0069;0.0069;0.0069;0.0069;0.0069;0.0069;0.0069;0.9444	s|1e1.2o3|2e1.3o3|2e2.1o2|3e1.1o3|3e1.2o3|3e1.3o3|3e2.1o2|3e2.2o2|i	9	3	0;0;0;0;0;0;0;0;0	chr22	+	21695486-21695867;21695492-21696031;21695492-21696747;21695496-21695843;21695496-21695867;21695496-21696031;21695496-21696747;21695496-21696885;21695497-21695842	21695394-21695496;21695843-21696178;21696747-21697013	21695497-21695842
574	PPIL2	ENSG00000100023.20	ENSG00000100023.20:s:21696747-21697013	0.0002;-0.0002	3.223e-05;3.223e-05	8.670e-01;8.670e-01	0.0172;0.9828	0.0213;0.9787	s|1e1.1o1|i	2	2	0;0	chr22	+	21696905-21697336;21697014-21697335	21696747-21697013;21697336-21700015	21697014-21697335
575	PPIL2	ENSG00000100023.20	ENSG00000100023.20:t:21696747-21697013	0.0001;0.0001;0.0001;-0.0006	9.285e-05;9.285e-05;9.285e-05;7.855e-04	8.812e-01;8.812e-01;8.812e-01;6.218e-01	0.0128;0.0128;0.0128;0.9615	0.0161;0.0161;0.0161;0.9516	t|1e1.2o3|1e1.3o3|2e1.3o3|i	4	2	0;0;0;0	chr22	+	21695492-21696747;21695496-21696747;21695496-21696885;21696179-21696746	21695394-21695496;21696747-21697013	21696179-21696746
576	DDX17	ENSG00000100201.23	ENSG00000100201.23:s:38492056-38492115	-0.0000;-0.0000;-0.0000;0.0001	3.282e-10;3.282e-10;3.282e-10;4.225e-09	9.974e-01;9.974e-01;9.974e-01;9.840e-01	0.0038;0.0038;0.0038;0.9887	0.0031;0.0031;0.0031;0.9908	s|1e1.1o1|1e2.1o1|1e3.1o1|i	4	4	0;0;0;0	chr22	-	38490436-38492056;38489458-38492056;38488115-38492056;38490437-38492055	38487873-38488961;38489228-38489458;38490313-38490436;38492056-38492115	38490437-38492055
577	DDX17	ENSG00000100201.23	ENSG00000100201.23:t:38487873-38488961	-0.0001;-0.0001;0.0002	1.153e-08;1.153e-08;5.475e-08	9.923e-01;9.923e-01;9.764e-01	0.0061;0.0061;0.9879	0.0040;0.0040;0.9919	t|1e1.1o1|1e2.1o1|i	3	3	0;0;0	chr22	-	38488115-38492056;38488115-38489228;38488962-38489227	38487873-38488961;38489228-38489458;38492056-38492115	38488962-38489227
578	DDX17	ENSG00000100201.23	ENSG00000100201.23:t:38489228-38489458	-0.0000;0.0000	3.677e-10;4.370e-10	9.950e-01;9.950e-01	0.0066;0.9934	0.0057;0.9943	t|1e1.1o1|i	2	2	0;0	chr22	-	38489458-38492056;38489459-38490312	38489228-38489458;38492056-38492115	38489459-38490312
579	MIEF1	ENSG00000100335.15	ENSG00000100335.15:s:39513517-39514224	-0.0002;0.0002	1.674e-06;1.674e-06	9.568e-01;9.568e-01	0.0128;0.9872	0.0096;0.9904	s|1e1.1o1|i	2	2	0;0	chr22	+	39514224-39515230;39514225-39515229	39513517-39514224;39515230-39518132	39514225-39515229
580	PRMT5	ENSG00000100462.16	ENSG00000100462.16:s:22920810-22921056	-0.0001;-0.0001;0.0003	4.517e-07;4.517e-07;1.979e-06	9.739e-01;9.739e-01;9.281e-01	0.0083;0.0083;0.9833	0.0072;0.0072;0.9857	s|1e1.1o1|2e1.1o1|i	3	2	0;0;0	chr14	-	22920731-22920988;22920731-22920840;22920732-22920809	22920525-22920731;22920810-22921056	22920732-22920809
581	HM13	ENSG00000101294.18	ENSG00000101294.18:s:31547382-31547692	-0.0002;-0.0002;-0.0002;0.0007	1.289e-05;1.289e-05;1.289e-05;1.125e-04	9.368e-01;9.368e-01;9.368e-01;7.622e-01	0.0111;0.0111;0.0111;0.9667	0.0089;0.0089;0.0089;0.9732	s|1e1.1o2|1e1.2o2|2e1.2o2|i	4	2	0;0;0;0	chr20	+	31547606-31548380;31547606-31548677;31547692-31548677;31547693-31548379	31547382-31547692;31548380-31548793	31547693-31548379
582	HM13	ENSG00000101294.18	ENSG00000101294.18:t:31548965-31549033	-0.0002;-0.0002;-0.0002;0.0009	4.040e-05;4.040e-05;4.040e-05;3.417e-04	9.084e-01;9.084e-01;9.084e-01;6.870e-01	0.0143;0.0143;0.0143;0.9571	0.0104;0.0104;0.0104;0.9688	t|1e1.1o1|2e1.1o1|2e2.1o1|i	4	3	0;0;0;0	chr20	+	31545035-31548965;31545035-31549029;31548793-31549029;31548794-31548964	31544947-31545035;31548380-31548793;31548965-31549033	31548794-31548964
583	FBRSL1	ENSG00000112787.14	ENSG00000112787.14:s:132571068-132571136	-0.0001;0.0001	1.311e-06;1.311e-06	9.483e-01;9.483e-01	0.0132;0.9868	0.0109;0.9891	s|1e1.1o1|i	2	2	0;0	chr12	+	132571136-132571307;132571137-132571151	132571068-132571136;132571307-132571524	132571137-132571151
584	ARID1A	ENSG00000117713.21	ENSG00000117713.21:s:26696015-26696100	-0.0002;0.0002	7.135e-08;7.138e-08	9.789e-01;9.789e-01	0.0103;0.9897	0.0075;0.9925	s|1e1.1o1|i	2	2	0;0	chr1	+	26696100-26729651;26696101-26696403	26696015-26696100;26728912-26729863	26696101-26696403
585	ARID1A	ENSG00000117713.21	ENSG00000117713.21:t:26774980-26775220	-0.0001;0.0001	2.029e-07;2.029e-07	9.708e-01;9.708e-01	0.0113;0.9887	0.0084;0.9916	t|1e1.1o1|i	2	2	0;0	chr1	+	26773898-26774980;26774963-26774979	26773802-26773898;26774980-26775220	26774963-26774979
586	MESD	ENSG00000117899.11	ENSG00000117899.11:s:80978931-80979477	-0.0004;0.0004	4.573e-05;4.573e-05	8.573e-01;8.573e-01	0.0222;0.9778	0.0179;0.9821	s|1e1.1o1|i	2	2	0;0	chr15	-	80952296-80978931;80978814-80978930	80951959-80952296;80978931-80979477	80978814-80978930
587	ZNF706	ENSG00000120963.12	ENSG00000120963.12:s:101204650-101204779	-0.0001;-0.0001;0.0003	3.897e-04;3.897e-04;1.535e-03	7.670e-01;7.670e-01;5.577e-01	0.0256;0.0256;0.9487	0.0278;0.0278;0.9444	s|1e1.2o2|1e2.1o1|i	3	3	0;0;0	chr8	-	101202447-101204650;101201743-101204650;101202453-101204649	101201716-101201743;101202333-101202452;101204650-101204779	101202453-101204649
588	ZNF706	ENSG00000120963.12	ENSG00000120963.12:t:101202333-101202452	-0.0001;-0.0001;-0.0001;0.0004	2.429e-04;2.429e-04;2.429e-04;2.006e-03	8.260e-01;8.260e-01;8.260e-01;5.149e-01	0.0192;0.0192;0.0192;0.9423	0.0208;0.0208;0.0208;0.9375	t|1e1.1o1|2e2.1o1|2e3.1o1|i	4	4	0;0;0;0	chr8	-	101202452-101205854;101202447-101205435;101202447-101204650;101202453-101204649	101202333-101202452;101204650-101204779;101205435-101205732;101205854-101206193	101202453-101204649
589	CAPZB	ENSG00000077549.19	ENSG00000077549.19:s:19344358-19344434	-0.0009;-0.0009;0.0052	1.085e-03;1.085e-03;6.887e-03	6.562e-01;6.562e-01;2.285e-01	0.0278;0.0278;0.9444	0.0215;0.0215;0.9569	s|1e1.1o1|1e2.1o1|i	3	3	0;0;0	chr1	-	19342864-19344358;19339617-19344358;19342865-19344357	19338775-19339617;19342752-19342864;19344358-19344434	19342865-19344357
590	JMJD4	ENSG00000081692.13	ENSG00000081692.13:s:227733907-227734377	-0.0002;0.0002	1.275e-03;1.275e-03	6.092e-01;6.092e-01	0.0455;0.9545	0.0455;0.9545	s|1e1.1o1|i	2	2	0;0	chr1	-	227733681-227733907;227733682-227733906	227733148-227733681;227733907-227734377	227733682-227733906
591	GMPR2	ENSG00000100938.19	ENSG00000100938.19:s:24235967-24236065	0.0001;-0.0001	3.699e-05;3.699e-05	8.578e-01;8.578e-01	0.0196;0.9804	0.0204;0.9796	s|1e1.2o2|i	2	2	0;0	chr14	+	24236041-24237071;24236066-24236095	24235967-24236065;24236975-24237152	24236066-24236095
592	GMPR2	ENSG00000100938.19	ENSG00000100938.19:s:24238589-24238839	-0.0003;-0.0003;-0.0003;0.0014	1.879e-05;1.879e-05;1.879e-05;1.624e-04	9.422e-01;9.422e-01;9.422e-01;7.750e-01	0.0114;0.0114;0.0114;0.9659	0.0066;0.0066;0.0066;0.9803	s|1e1.1o2|2e1.1o2|3e1.2o2|i	4	2	0;0;0;0	chr14	+	24238748-24238906;24238769-24238906;24238803-24238958;24238840-24238905	24238589-24238839;24238906-24239242	24238840-24238905
593	KCTD10	ENSG00000110906.13	ENSG00000110906.13:t:109456118-109456244	-0.0002;0.0002	9.328e-08;9.331e-08	9.826e-01;9.826e-01	0.0103;0.9897	0.0047;0.9953	t|1e1.1o1|i	2	2	0;0	chr12	-	109456244-109457630;109456245-109456284	109456118-109456244;109457630-109457975	109456245-109456284
594	CSRNP2	ENSG00000110925.7	ENSG00000110925.7:s:51076569-51076835	-0.0002;0.0002	3.527e-08;3.526e-08	9.868e-01;9.868e-01	0.0093;0.9907	0.0048;0.9952	s|1e1.1o1|i	2	2	0;0	chr12	-	51076497-51076621;51076498-51076568	51076411-51076497;51076569-51076835	51076498-51076568
595	TNS2	ENSG00000111077.18	ENSG00000111077.18:s:53059047-53059971	-0.0002;-0.0002;0.0004	5.934e-04;5.934e-04;2.346e-03	7.333e-01;7.333e-01;5.109e-01	0.0290;0.0290;0.9419	0.0278;0.0278;0.9444	s|1e2.1o1|2e1.1o1|i	3	3	0;0;0	chr12	+	53059967-53060405;53059971-53060167;53059972-53060166	53059047-53059971;53060167-53060258;53060345-53060555	53059972-53060166
596	MAPK14	ENSG00000112062.11	ENSG00000112062.11:s:36027677-36027884	-0.0006;0.0006	6.832e-05;6.832e-05	8.477e-01;8.477e-01	0.0238;0.9762	0.0167;0.9833	s|1e1.1o1|i	2	2	0;0	chr6	+	36027884-36028191;36027885-36028157	36027677-36027884;36028158-36028273	36027885-36028157
597	FN1	ENSG00000115414.21	ENSG00000115414.21:t:215371864-215372015	-0.0001;-0.0001;0.0001	3.201e-06;3.201e-06;1.341e-05	9.520e-01;9.520e-01;8.775e-01	0.0098;0.0098;0.9804	0.0101;0.0101;0.9798	t|1e1.1o1|1e2.1o1|i	3	3	0;0;0	chr2	-	215372015-215373322;215372015-215372109;215372016-215372108	215371864-215372015;215372109-215372482;215373322-215373411	215372016-215372108
598	HSPE1	ENSG00000115541.11	ENSG00000115541.11:s:197503039-197503128	-0.0011;0.0011	1.200e-04;1.200e-04	8.350e-01;8.350e-01	0.0294;0.9706	0.0127;0.9873	s|1e1.1o1|i	2	2	0;0	chr2	+	197503128-197503209;197503129-197503208	197503039-197503128;197503209-197503449	197503129-197503208
599	WIPF1	ENSG00000115935.18	ENSG00000115935.18:s:174562204-174562602	-0.0008;0.0008	6.392e-04;6.392e-04	6.953e-01;6.953e-01	0.0385;0.9615	0.0294;0.9706	s|1e1.1o1|i	2	2	0;0	chr2	-	174562125-174562551;174562126-174562203	174559572-174562125;174562204-174562602	174562126-174562203
600	TNFRSF10B	ENSG00000120889.13	ENSG00000120889.13:s:23028529-23028602	-0.0002;0.0002	7.353e-05;7.353e-05	8.347e-01;8.347e-01	0.0217;0.9783	0.0200;0.9800	s|1e1.1o1|i	2	2	0;0	chr8	-	23028441-23028529;23028442-23028528	23028265-23028441;23028529-23028602	23028442-23028528
601	PDZRN3	ENSG00000121440.15	ENSG00000121440.15:s:73384183-73384930	-0.0008;0.0008	8.049e-05;8.049e-05	8.429e-01;8.429e-01	0.0263;0.9737	0.0152;0.9848	s|1e1.1o1|i	2	2	0;0	chr3	-	73383805-73384649;73383806-73384182	73382431-73383805;73384183-73384930	73383806-73384182
602	RBBP6	ENSG00000122257.20	ENSG00000122257.20:s:24539556-24540001	-0.0002;-0.0002;0.0005	2.878e-06;2.878e-06;1.219e-05	9.553e-01;9.553e-01;8.847e-01	0.0113;0.0113;0.9774	0.0078;0.0078;0.9843	s|1e2.1o1|2e1.1o1|i	3	3	0;0;0	chr16	+	24539759-24540612;24540001-24540146;24540002-24540145	24539556-24540001;24540146-24540284;24540496-24540792	24540002-24540145
603	RBBP6	ENSG00000122257.20	ENSG00000122257.20:t:24540496-24540792	-0.0001;-0.0001;0.0002	2.079e-08;2.079e-08;9.745e-08	9.901e-01;9.901e-01;9.702e-01	0.0063;0.0063;0.9873	0.0048;0.0048;0.9905	t|1e1.1o1|1e2.1o2|i	3	3	0;0;0	chr16	+	24537933-24540612;24539759-24540612;24540285-24540495	24537693-24537933;24539556-24540001;24540496-24540792	24540285-24540495
604	KDM5C	ENSG00000126012.13	ENSG00000126012.13:s:53198764-53198888	-0.0003;0.0003	7.278e-04;7.278e-04	6.730e-01;6.730e-01	0.0385;0.9615	0.0357;0.9643	s|1e1.1o1|i	2	2	0;0	chrX	-	53198637-53198764;53198638-53198763	53198490-53198637;53198764-53198888	53198638-53198763
605	KDM5C	ENSG00000126012.13	ENSG00000126012.13:t:53191080-53191622	0.0007;-0.0007	1.533e-03;1.533e-03	6.078e-01;6.078e-01	0.0357;0.9643	0.0455;0.9545	t|1e1.2o2|i	2	2	0;0	chrX	-	53191622-53193437;53191623-53192157	53191080-53191622;53193437-53193636	53191623-53192157
606	KDM5C	ENSG00000126012.13	ENSG00000126012.13:t:53192158-53192837	-0.0001;-0.0001;0.0002	1.806e-07;1.806e-07;8.054e-07	9.812e-01;9.812e-01;9.465e-01	0.0077;0.0077;0.9847	0.0061;0.0061;0.9878	t|1e1.1o2|2e1.2o2|i	3	2	0;0;0	chrX	-	53192837-53193498;53192486-53193437;53192838-53192928	53192158-53192837;53193437-53193636	53192838-53192928
607	PCID2	ENSG00000126226.22	ENSG00000126226.22:s:113178174-113178478	-0.0001;-0.0001;0.0004	2.621e-05;2.621e-05;1.065e-04	9.010e-01;9.010e-01;7.746e-01	0.0152;0.0152;0.9697	0.0139;0.0139;0.9722	s|1e1.1o2|1e1.2o2|i	3	2	0;0;0	chr13	-	113178008-113178174;113177976-113178174;113178009-113178173	113177536-113178008;113178174-113178478	113178009-113178173
608	KLF16	ENSG00000129911.9	ENSG00000129911.9:s:1854281-1854760	-0.0004;0.0004	7.348e-05;7.348e-05	8.333e-01;8.333e-01	0.0238;0.9762	0.0204;0.9796	s|1e1.1o1|i	2	2	0;0	chr19	-	1852595-1854281;1852596-1854280	1852399-1852595;1854281-1854760	1852596-1854280
609	BCLAF1	ENSG00000029363.17	ENSG00000029363.17:t:136275843-136275989	-0.0001;-0.0001;0.0002	5.699e-09;5.699e-09;2.747e-08	9.941e-01;9.941e-01;9.817e-01	0.0057;0.0057;0.9885	0.0035;0.0035;0.9931	t|1e1.1o1|1e2.1o1|i	3	3	0;0;0	chr6	-	136275989-136277865;136275989-136276468;136275990-136276467	136275843-136275989;136276468-136276508;136277865-136278776	136275990-136276467
610	MRI1	ENSG00000037757.14	ENSG00000037757.14:t:13768615-13768737	-0.0006;0.0006	1.667e-04;1.667e-04	7.981e-01;7.981e-01	0.0263;0.9737	0.0208;0.9792	t|1e1.1o1|i	2	2	0;0	chr19	+	13768447-13768615;13768582-13768614	13768359-13768557;13768615-13768737	13768582-13768614
611	CELF2	ENSG00000048740.19	ENSG00000048740.19:s:11328926-11329289	-0.0001;0.0001	7.294e-09;7.385e-09	9.888e-01;9.888e-01	0.0083;0.9917	0.0064;0.9936	s|1e1.1o1|i	2	2	0;0	chr10	+	11329097-11330456;11329290-11330455	11328926-11329289;11330456-11336675	11329290-11330455
612	NEXMIF	ENSG00000050030.16	ENSG00000050030.16:s:74739369-74739498	-0.0004;0.0004	1.490e-05;1.490e-05	9.028e-01;9.028e-01	0.0179;0.9821	0.0137;0.9863	s|1e1.1o1|i	2	2	0;0	chrX	-	74737234-74739369;74737235-74739368	74732856-74737234;74739369-74739498	74737235-74739368
613	NEXMIF	ENSG00000050030.16	ENSG00000050030.16:s:74740100-74744477	0.0005;-0.0005	1.603e-04;1.603e-04	7.984e-01;7.984e-01	0.0185;0.9815	0.0278;0.9722	s|1e1.1o1|i	2	2	0;0	chrX	-	74739498-74740100;74739499-74740099	74739369-74739498;74740100-74744477	74739499-74740099
614	GALC	ENSG00000054983.17	ENSG00000054983.17:t:87933014-87933999	-0.0005;0.0005	6.080e-04;6.080e-04	6.870e-01;6.870e-01	0.0371;0.9629	0.0323;0.9677	t|1e1.1o1|i	2	2	0;0	chr14	-	87933999-87939905;87934000-87934330	87933014-87933999;87939905-87939981	87934000-87934330
615	MRPL43	ENSG00000055950.17	ENSG00000055950.17:s:100986588-100986975	0.0001;0.0001;0.0001;0.0001;-0.0005	1.901e-06;1.901e-06;1.901e-06;1.901e-06;2.893e-05	9.728e-01;9.728e-01;9.728e-01;9.728e-01;8.328e-01	0.0054;0.0054;0.0054;0.0054;0.9784	0.0070;0.0070;0.0070;0.0070;0.9719	s|1e1.1o1|1e2.1o1|1e3.1o1|2e1.1o1|i	5	4	0;0;0;0;0	chr10	-	100986572-100986749;100984074-100986749;100983817-100986749;100986572-100986687;100986573-100986587	100983755-100983817;100983948-100984074;100986269-100986572;100986588-100986975	100986573-100986587
616	SLC2A3	ENSG00000059804.16	ENSG00000059804.16:s:7919666-7919750	-0.0003;0.0003	5.095e-06;5.095e-06	9.290e-01;9.290e-01	0.0152;0.9848	0.0119;0.9881	s|1e1.1o1|i	2	2	0;0	chr12	-	7919528-7919666;7919529-7919665	7919230-7919528;7919666-7919750	7919529-7919665
617	TNK2	ENSG00000061938.21	ENSG00000061938.21:s:195868349-195868709	-0.0001;0.0001	7.176e-05;7.176e-05	8.355e-01;8.355e-01	0.0217;0.9783	0.0213;0.9787	s|1e1.1o1|i	2	2	0;0	chr3	-	195868297-195868533;195868298-195868348	195867361-195868297;195868349-195868709	195868298-195868348
618	ZNF275	ENSG00000063587.15	ENSG00000063587.15:s:153346819-153347655	-0.0007;0.0007	4.353e-04;4.353e-04	7.353e-01;7.353e-01	0.0345;0.9655	0.0233;0.9767	s|1e1.1o1|i	2	2	0;0	chrX	+	153347655-153347754;153347656-153347753	153346819-153347655;153347754-153351393	153347656-153347753
619	TLE2	ENSG00000065717.15	ENSG00000065717.15:t:2997639-2997762	-0.0006;0.0006	3.493e-04;3.493e-04	7.343e-01;7.343e-01	0.0333;0.9667	0.0270;0.9730	t|1e1.1o1|i	2	2	0;0	chr19	-	2997762-3019412;2997763-2997847	2997639-2997762;3019412-3019480	2997763-2997847
620	TLE2	ENSG00000065717.15	ENSG00000065717.15:t:3009542-3009577	-0.0001;0.0001	1.129e-04;1.129e-04	8.018e-01;8.018e-01	0.0257;0.9743	0.0251;0.9749	t|1e1.1o1|i	2	2	0;0	chr19	-	3009577-3019699;3009578-3009660	3009542-3009577;3019500-3019773	3009578-3009660
621	TRAM1	ENSG00000067167.8	ENSG00000067167.8:s:70608220-70608416	-0.0003;-0.0003;0.0008	2.342e-06;2.342e-06;9.965e-06	9.632e-01;9.632e-01;9.029e-01	0.0111;0.0111;0.9778	0.0061;0.0061;0.9879	s|1e2.1o1|2e1.1o1|i	3	3	0;0;0	chr8	-	70600082-70608263;70608136-70608220;70608137-70608219	70600019-70600082;70608077-70608136;70608220-70608416	70608137-70608219
622	FAM3A	ENSG00000071889.17	ENSG00000071889.17:s:154515910-154516242	0.0001;0.0001;-0.0002	1.074e-04;1.074e-04;4.283e-04	8.461e-01;8.461e-01;6.783e-01	0.0171;0.0171;0.9658	0.0208;0.0208;0.9583	s|1e1.1o1|2e1.1o1|i	3	2	0;0;0	chrX	-	154515812-154515969;154515812-154515910;154515822-154515909	154515760-154515821;154515910-154516242	154515822-154515909
623	RHOBTB1	ENSG00000072422.17	ENSG00000072422.17:s:60871444-60871667	-0.0007;0.0007	2.630e-04;2.630e-04	7.694e-01;7.694e-01	0.0312;0.9688	0.0227;0.9773	s|1e1.1o1|i	2	2	0;0	chr10	-	60871325-60871444;60871326-60871443	60869438-60871325;60871444-60871667	60871326-60871443
624	CBARP	ENSG00000099625.14	ENSG00000099625.14:s:1231101-1231275	-0.0002;-0.0002;0.0005	1.045e-04;1.045e-04;4.154e-04	8.521e-01;8.521e-01;6.877e-01	0.0191;0.0191;0.9619	0.0167;0.0167;0.9667	s|1e1.1o2|1e1.2o2|i	3	2	0;0;0	chr19	-	1230142-1231101;1230137-1231101;1230143-1231100	1228287-1230142;1231101-1231275	1230143-1231100
625	CBARP	ENSG00000099625.14	ENSG00000099625.14:t:1235001-1235145	-0.0002;-0.0002;0.0005	2.728e-05;2.728e-05;1.106e-04	9.059e-01;9.059e-01;7.832e-01	0.0142;0.0142;0.9716	0.0121;0.0121;0.9757	t|1e1.1o1|1e2.1o1|i	3	3	0;0;0	chr19	-	1235145-1235501;1235145-1235337;1235146-1235336	1235001-1235145;1235337-1235390;1235501-1235565	1235146-1235336
626	SUN2	ENSG00000100242.16	ENSG00000100242.16:s:38740889-38741050	0.0000;0.0000;-0.0002	3.813e-04;3.813e-04;1.498e-03	7.680e-01;7.680e-01;5.594e-01	0.0238;0.0238;0.9524	0.0267;0.0267;0.9466	s|1e1.1o1|2e1.1o1|i	3	2	0;0;0	chr22	-	38740432-38741007;38740432-38740889;38740433-38740888	38740267-38740432;38740889-38741050	38740433-38740888
627	SUN2	ENSG00000100242.16	ENSG00000100242.16:s:38742515-38742578	-0.0001;0.0001	9.493e-08;9.492e-08	9.751e-01;9.751e-01	0.0106;0.9894	0.0082;0.9918	s|1e1.2o2|i	2	2	0;0	chr22	-	38741551-38742515;38742482-38742514	38741494-38741571;38742515-38742578	38742482-38742514
628	NOP56	ENSG00000101361.17	ENSG00000101361.17:s:2657373-2657488	-0.0004;-0.0004;0.0010	3.955e-04;3.955e-04;1.571e-03	7.738e-01;7.738e-01;5.651e-01	0.0247;0.0247;0.9505	0.0230;0.0230;0.9540	s|1e1.1o1|1e2.1o1|i	3	3	0;0;0	chr20	+	2657488-2657639;2657488-2657929;2657489-2657638	2657373-2657488;2657639-2657692;2657929-2658393	2657489-2657638
629	NOP56	ENSG00000101361.17	ENSG00000101361.17:t:2656401-2656549	-0.0002;-0.0002;0.0004	7.844e-05;7.844e-05;3.125e-04	8.636e-01;8.636e-01;7.074e-01	0.0185;0.0185;0.9630	0.0167;0.0167;0.9667	t|1e1.1o1|1e2.1o1|i	3	3	0;0;0	chr20	+	2656034-2656401;2656214-2656401;2656215-2656400	2655934-2656034;2656111-2656214;2656401-2656549	2656215-2656400
630	LZTR1	ENSG00000099949.21	ENSG00000099949.21:s:20994104-20994300	-0.0001;-0.0001;0.0003	6.495e-04;6.495e-04;2.578e-03	7.278e-01;7.278e-01;5.025e-01	0.0278;0.0278;0.9444	0.0278;0.0278;0.9444	s|1e1.1o2|1e1.2o2|i	3	2	0;0;0	chr22	+	20994269-20994558;20994269-20994674;20994301-20994476	20994104-20994300;20994477-20994727	20994301-20994476
631	LGMN	ENSG00000100600.15	ENSG00000100600.15:t:92703807-92704247	-0.0004;0.0004	2.363e-06;2.363e-06	9.517e-01;9.517e-01	0.0154;0.9846	0.0072;0.9928	t|1e1.1o2|i	2	2	0;0	chr14	-	92704247-92716185;92704248-92704275	92703807-92704247;92715744-92716221	92704248-92704275
632	PSMC1	ENSG00000100764.14	ENSG00000100764.14:t:90263801-90263944	-0.0004;0.0004	6.375e-06;6.375e-06	9.264e-01;9.264e-01	0.0167;0.9833	0.0111;0.9889	t|1e1.1o2|i	2	2	0;0	chr14	+	90256592-90263801;90263671-90263800	90256527-90256600;90263801-90263944	90263671-90263800
633	TPD52L2	ENSG00000101150.18	ENSG00000101150.18:t:63889190-63889238	-0.0001;-0.0001;-0.0001;0.0005	2.207e-04;2.207e-04;2.207e-04;1.830e-03	8.328e-01;8.328e-01;8.328e-01;5.268e-01	0.0192;0.0192;0.0192;0.9423	0.0179;0.0179;0.0179;0.9464	t|1e1.1o1|1e2.1o1|1e3.1o1|i	4	4	0;0;0;0	chr20	+	63873816-63889190;63882820-63889190;63887605-63889190;63887606-63889189	63873668-63873816;63882719-63882820;63886882-63887605;63889190-63889238	63887606-63889189
634	CTSZ	ENSG00000101160.15	ENSG00000101160.15:t:58985686-58991436	-0.0007;0.0007	4.116e-04;4.116e-04	7.232e-01;7.232e-01	0.0357;0.9643	0.0262;0.9738	t|1e1.1o1|i	2	2	0;0	chr20	-	58991436-58992762;58991437-58992108	58985686-58991436;58992762-58992841	58991437-58992108
635	CTSZ	ENSG00000101160.15	ENSG00000101160.15:t:58992911-58994221	-0.0002;-0.0002;0.0006	4.524e-06;4.524e-06;1.902e-05	9.488e-01;9.488e-01;8.703e-01	0.0119;0.0119;0.9762	0.0083;0.0083;0.9834	t|1e1.1o1|1e2.1o1|i	3	3	0;0;0	chr20	-	58994221-58997603;58994221-58996639;58994222-58995184	58992911-58994221;58996579-58996801;58997603-58997753	58994222-58995184
636	IDH3B	ENSG00000101365.21	ENSG00000101365.21:t:2658395-2658522	-0.0001;-0.0001;-0.0001;0.0005	2.599e-06;2.599e-06;2.599e-06;2.368e-05	9.651e-01;9.651e-01;9.651e-01;8.500e-01	0.0083;0.0083;0.0083;0.9750	0.0068;0.0068;0.0068;0.9797	t|1e1.1o1|1e2.1o2|1e2.2o2|i	4	3	0;0;0;0	chr20	-	2658522-2659525;2658522-2658759;2658522-2658638;2658523-2658541	2658395-2658522;2658542-2658837;2659525-2659585	2658523-2658541
637	PROSER1	ENSG00000120685.20	ENSG00000120685.20:t:39009865-39011337	-0.0006;0.0006	4.282e-05;4.282e-05	8.671e-01;8.671e-01	0.0227;0.9773	0.0141;0.9859	t|1e1.1o1|i	2	2	0;0	chr13	-	39011337-39012083;39011338-39011375	39009865-39011337;39012083-39012475	39011338-39011375
638	ENOSF1	ENSG00000132199.20	ENSG00000132199.20:s:673900-674406	-0.0004;0.0004	1.257e-04;1.257e-04	8.078e-01;8.078e-01	0.0257;0.9743	0.0213;0.9787	s|1e1.1o1|i	2	2	0;0	chr18	-	673076-674161;673077-673899	670318-673076;673900-674406	673077-673899
639	MYBBP1A	ENSG00000132382.15	ENSG00000132382.15:s:4539363-4539967	-0.0002;0.0002	4.497e-06;4.497e-06	9.268e-01;9.268e-01	0.0156;0.9844	0.0128;0.9872	s|1e1.1o1|i	2	2	0;0	chr17	-	4538975-4539439;4538976-4539362	4538897-4538975;4539363-4539967	4538976-4539362
640	MYBBP1A	ENSG00000132382.15	ENSG00000132382.15:t:4540348-4540395	0.0002;-0.0002	1.583e-05;1.583e-05	8.909e-01;8.909e-01	0.0161;0.9839	0.0192;0.9808	t|1e1.1o2|i	2	2	0;0	chr17	-	4540395-4545032;4540396-4540435	4540348-4540395;4545026-4545175	4540396-4540435
641	WBP2	ENSG00000132471.12	ENSG00000132471.12:s:75846323-75846787	-0.0000;-0.0000;0.0001	8.691e-11;8.691e-11;6.976e-10	9.979e-01;9.979e-01;9.930e-01	0.0045;0.0045;0.9911	0.0031;0.0031;0.9939	s|1e1.1o1|2e1.1o1|i	3	2	0;0;0	chr17	-	75846034-75846738;75846034-75846336;75846035-75846322	75845699-75846034;75846323-75846787	75846035-75846322
642	H3-3B	ENSG00000132475.10	ENSG00000132475.10:s:75778883-75778963	-0.0000;0.0000	2.247e-21;1.110e-16	9.999e-01;9.999e-01	0.0033;0.9967	0.0015;0.9985	s|1e1.1o1|i	2	2	0;0	chr17	-	75778723-75778883;75778883-75778882	75776434-75778723;75778810-75778882;75778883-75778963	75778883-75778882
643	H3-3B	ENSG00000132475.10	ENSG00000132475.10:s:75779047-75779286	-0.0002;0.0002	4.474e-07;4.474e-07	9.730e-01;9.730e-01	0.0102;0.9898	0.0073;0.9927	s|1e1.1o1|i	2	2	0;0	chr17	-	75778963-75779047;75778964-75779046	75778883-75778963;75779047-75779286	75778964-75779046
644	H3-3B	ENSG00000132475.10	ENSG00000132475.10:t:75776434-75778723	0.0000;0.0000;0.0000;-0.0001	1.259e-04;1.259e-04;1.259e-04;1.047e-03	8.599e-01;8.599e-01;8.599e-01;5.802e-01	0.0156;0.0156;0.0156;0.9531	0.0179;0.0179;0.0179;0.9464	t|1e1.1o1|1e2.1o2|1e2.2o2|i	4	3	0;0;0;0	chr17	-	75778723-75778883;75778723-75778821;75778723-75778810;75778724-75778809	75776434-75778723;75778810-75778882;75778883-75778963	75778724-75778809
645	H3-3B	ENSG00000132475.10	ENSG00000132475.10:t:75778810-75778882	-0.0000;0.0000	2.247e-21;1.110e-16	9.999e-01;9.999e-01	0.0033;0.9967	0.0015;0.9985	t|1e1.1o3|i	2	2	0;0	chr17	-	75778882-75779662;75778883-75778882	75778810-75778882;75778883-75778963;75779647-75779780	75778883-75778882
646	H3-3B	ENSG00000132475.10	ENSG00000132475.10:t:75779047-75779286	-0.0001;-0.0001;-0.0001;-0.0001;0.0005	6.534e-05;6.534e-05;6.534e-05;6.534e-05;8.929e-04	9.045e-01;9.045e-01;9.045e-01;9.045e-01;5.944e-01	0.0118;0.0118;0.0118;0.0118;0.9529	0.0118;0.0118;0.0118;0.0118;0.9529	t|1e1.1o1|1e2.2o3|1e2.3o3|1e3.1o1|i	5	4	0;0;0;0;0	chr17	-	75779184-75785376;75779184-75779657;75779184-75779647;75779184-75779542;75779287-75779541	75779047-75779286;75779542-75779603;75779647-75779780;75783107-75785893	75779287-75779541
647	DCAF8	ENSG00000132716.19	ENSG00000132716.19:t:160215715-160216908	-0.0004;0.0004	1.570e-05;1.570e-05	9.010e-01;9.010e-01	0.0189;0.9811	0.0135;0.9865	t|1e1.1o2|i	2	2	0;0	chr1	-	160216908-160222656;160216909-160217161	160215715-160216908;160222651-160222781	160216909-160217161
648	HUS1	ENSG00000136273.13	ENSG00000136273.13:s:47965166-47965438	0.0002;-0.0002	1.200e-03;1.200e-03	6.225e-01;6.225e-01	0.0385;0.9615	0.0455;0.9545	s|1e1.1o1|i	2	2	0;0	chr7	-	47964632-47965300;47964633-47965165	47963288-47964632;47965166-47965438	47964633-47965165
649	KATNB1	ENSG00000140854.13	ENSG00000140854.13:s:57736973-57737067	-0.0003;-0.0003;0.0007	6.932e-06;6.932e-06;2.889e-05	9.409e-01;9.409e-01;8.533e-01	0.0133;0.0133;0.9733	0.0090;0.0090;0.9820	s|1e1.1o1|2e2.1o1|i	3	3	0;0;0	chr16	+	57737063-57737226;57737067-57741687;57737068-57737191	57736973-57737067;57737192-57737283;57741687-57741817	57737068-57737191
650	RRN3	ENSG00000085721.13	ENSG00000085721.13:s:15061428-15061905	-0.0007;0.0007	5.577e-05;5.577e-05	8.773e-01;8.773e-01	0.0209;0.9791	0.0133;0.9867	s|1e1.1o1|i	2	2	0;0	chr16	-	15060173-15061789;15060174-15061427	15060033-15060173;15061428-15061905	15060174-15061427
651	BAX	ENSG00000087088.21	ENSG00000087088.21:s:48960810-48961197	-0.0003;-0.0003;0.0008	8.084e-05;8.084e-05;3.231e-04	8.644e-01;8.644e-01;7.084e-01	0.0196;0.0196;0.9608	0.0152;0.0152;0.9697	s|1e1.1o2|1e1.2o2|i	3	2	0;0;0	chr19	+	48960914-48961532;48960914-48961571;48961198-48961531	48960810-48961197;48961532-48961798	48961198-48961531
652	ADD1	ENSG00000087274.19	ENSG00000087274.19:s:2928603-2929327	-0.0000;0.0000	2.249e-21;1.347e-13	9.995e-01;9.995e-01	0.0046;0.9954	0.0025;0.9975	s|1e1.1o1|i	2	2	0;0	chr4	+	2928642-2929596;2929328-2929595	2928603-2929327;2929596-2930076	2929328-2929595
653	EBF4	ENSG00000088881.21	ENSG00000088881.21:s:2755088-2755649	-0.0000;0.0000	1.496e-04;1.496e-04	7.893e-01;7.893e-01	0.0250;0.9750	0.0263;0.9737	s|1e1.1o1|i	2	2	0;0	chr20	+	2755649-2759883;2755650-2755742	2755088-2755649;2759883-2760108	2755650-2755742
654	EBF4	ENSG00000088881.21	ENSG00000088881.21:t:2755743-2755824	-0.0000;0.0000	1.496e-04;1.496e-04	7.893e-01;7.893e-01	0.0250;0.9750	0.0263;0.9737	t|1e1.1o1|i	2	2	0;0	chr20	+	2752545-2755743;2755650-2755742	2752357-2752545;2755743-2755824	2755650-2755742
655	EBF4	ENSG00000088881.21	ENSG00000088881.21:t:2759883-2760108	-0.0003;0.0003	3.181e-04;3.181e-04	7.488e-01;7.488e-01	0.0303;0.9697	0.0257;0.9743	t|1e1.1o1|i	2	2	0;0	chr20	+	2755649-2759883;2759394-2759882	2755088-2755649;2759883-2760108	2759394-2759882
656	TAF6	ENSG00000106290.16	ENSG00000106290.16:s:100119204-100119317	-0.0000;-0.0000;-0.0000;-0.0000;-0.0000;-0.0000;-0.0000;0.0002	6.452e-05;6.452e-05;6.452e-05;6.452e-05;6.452e-05;6.452e-05;6.452e-05;2.071e-03	9.290e-01;9.290e-01;9.290e-01;9.290e-01;9.290e-01;9.290e-01;9.290e-01;5.042e-01	0.0083;0.0083;0.0083;0.0083;0.0083;0.0083;0.0083;0.9417	0.0089;0.0089;0.0089;0.0089;0.0089;0.0089;0.0089;0.9375	s|1e1.2o2|2e1.2o2|2e2.1o2|2e2.2o2|2e3.1o1|2e4.2o3|2e4.3o3|i	8	5	0;0;0;0;0;0;0;0	chr7	-	100118649-100119232;100118649-100119204;100116633-100119204;100116612-100119204;100114845-100119204;100114268-100119204;100114231-100119204;100118977-100119203	100113962-100114565;100114755-100114845;100116514-100116633;100118396-100118653;100119204-100119317	100118977-100119203
657	EZH2	ENSG00000106462.12	ENSG00000106462.12:s:148817222-148817528	0.0004;-0.0004	8.472e-04;8.472e-04	6.545e-01;6.545e-01	0.0357;0.9643	0.0455;0.9545	s|1e1.1o1|i	2	2	0;0	chr7	-	148816778-148817222;148816779-148817221	148816684-148816778;148817222-148817528	148816779-148817221
658	DNM1	ENSG00000106976.21	ENSG00000106976.21:s:128226035-128226086	0.0000;-0.0000	1.524e-05;1.524e-05	8.917e-01;8.917e-01	0.0170;0.9830	0.0184;0.9816	s|1e1.1o1|i	2	2	0;0	chr9	+	128226086-128234021;128226087-128226137	128226035-128226086;128233564-128234107	128226087-128226137
659	DNM1	ENSG00000106976.21	ENSG00000106976.21:t:128254650-128255248	-0.0001;-0.0001;-0.0001;0.0003	2.573e-07;2.573e-07;2.573e-07;2.525e-06	9.821e-01;9.821e-01;9.821e-01;9.132e-01	0.0063;0.0063;0.0063;0.9812	0.0054;0.0054;0.0054;0.9837	t|1e1.1o1|2e1.1o1|2e2.1o1|i	4	3	0;0;0;0	chr9	+	128250940-128254650;128250940-128254654;128253137-128254654;128254163-128254649	128250725-128251244;128253101-128253137;128254650-128255248	128254163-128254649
660	TRIM3	ENSG00000110171.21	ENSG00000110171.21:s:6450551-6450621	0.0001;-0.0001	6.764e-05;6.764e-05	8.368e-01;8.368e-01	0.0200;0.9800	0.0233;0.9767	s|1e1.1o1|i	2	2	0;0	chr11	-	6449446-6450551;6450392-6450550	6449306-6449446;6450551-6450621	6450392-6450550
661	TRIM3	ENSG00000110171.21	ENSG00000110171.21:t:6449306-6449446	-0.0001;0.0001	1.190e-04;1.190e-04	8.029e-01;8.029e-01	0.0250;0.9750	0.0250;0.9750	t|1e1.1o1|i	2	2	0;0	chr11	-	6449446-6450551;6449447-6450168	6449306-6449446;6450551-6450621	6449447-6450168
662	CCNG1	ENSG00000113328.19	ENSG00000113328.19:s:163443757-163444078	-0.0003;0.0003	2.963e-06;2.963e-06	9.403e-01;9.403e-01	0.0152;0.9848	0.0098;0.9902	s|1e1.1o1|i	2	2	0;0	chr5	+	163443925-163444337;163444079-163444336	163443757-163444078;163444337-163445016	163444079-163444336
663	CCNG1	ENSG00000113328.19	ENSG00000113328.19:t:163441178-163441331	-0.0001;0.0001	2.251e-07;2.251e-07	9.716e-01;9.716e-01	0.0104;0.9896	0.0086;0.9914	t|1e1.1o2|i	2	2	0;0	chr5	+	163439346-163441211;163441158-163441177	163439191-163439602;163441178-163441331	163441158-163441177
664	RPL24	ENSG00000114391.13	ENSG00000114391.13:s:101686672-101686718	-0.0004;0.0004	3.070e-04;3.070e-04	7.507e-01;7.507e-01	0.0294;0.9706	0.0278;0.9722	s|1e1.1o1|i	2	2	0;0	chr3	-	101686557-101686672;101686558-101686671	101686029-101686557;101686672-101686718	101686558-101686671
665	RPL24	ENSG00000114391.13	ENSG00000114391.13:t:101681091-101681215	-0.0002;-0.0002;0.0005	3.904e-04;3.904e-04;1.541e-03	7.701e-01;7.701e-01;5.612e-01	0.0280;0.0280;0.9441	0.0238;0.0238;0.9524	t|1e1.1o1|1e2.1o1|i	3	3	0;0;0	chr3	-	101681215-101682771;101681215-101682429;101681216-101682041	101681091-101681215;101682042-101682492;101682771-101682907	101681216-101682041
666	SRSF7	ENSG00000115875.19	ENSG00000115875.19:s:38749529-38749705	-0.0002;-0.0002;-0.0002;0.0009	2.915e-05;2.915e-05;2.915e-05;2.494e-04	9.201e-01;9.201e-01;9.201e-01;7.161e-01	0.0128;0.0128;0.0128;0.9615	0.0096;0.0096;0.0096;0.9712	s|1e1.1o2|1e1.2o2|1e2.1o1|i	4	3	0;0;0;0	chr2	-	38749346-38749529;38749173-38749529;38748653-38749529;38749347-38749528	38748579-38748653;38748898-38749346;38749529-38749705	38749347-38749528
667	SRSF7	ENSG00000115875.19	ENSG00000115875.19:t:38748579-38748653	0.0002;0.0002;-0.0005	4.521e-05;4.521e-05;1.827e-04	8.948e-01;8.948e-01;7.616e-01	0.0128;0.0128;0.9744	0.0166;0.0166;0.9667	t|1e1.1o1|1e2.1o1|i	3	3	0;0;0	chr2	-	38748653-38749529;38748653-38748898;38748654-38748897	38748579-38748653;38748898-38749346;38749529-38749705	38748654-38748897
668	ZNF410	ENSG00000119725.21	ENSG00000119725.21:s:73891850-73892107	-0.0005;0.0005	1.476e-05;1.476e-05	9.128e-01;9.128e-01	0.0179;0.9821	0.0119;0.9881	s|1e1.2o2|i	2	2	0;0	chr14	+	73892107-73893797;73892108-73892175	73891850-73892107;73893289-73893932	73892108-73892175
669	NAA60	ENSG00000122390.19	ENSG00000122390.19:t:3484762-3485207	-0.0007;0.0007	2.626e-05;2.626e-05	9.006e-01;9.006e-01	0.0217;0.9783	0.0104;0.9896	t|1e1.1o1|i	2	2	0;0	chr16	+	3482598-3484762;3484754-3484761	3482502-3482598;3484762-3485207	3484754-3484761
670	CSK	ENSG00000103653.17	ENSG00000103653.17:s:74782080-74782148	-0.0005;0.0005	7.877e-06;7.877e-06	9.304e-01;9.304e-01	0.0161;0.9839	0.0094;0.9906	s|1e1.1o1|i	2	2	0;0	chr15	+	74782148-74782668;74782149-74782503	74782080-74782148;74782504-74782720	74782149-74782503
671	OAZ1	ENSG00000104904.12	ENSG00000104904.12:s:2271319-2271442	-0.0000;0.0000	4.374e-10;4.757e-10	9.954e-01;9.954e-01	0.0067;0.9933	0.0048;0.9952	s|1e1.1o1|i	2	2	0;0	chr19	+	2271442-2271444;2271443-2271443	2271319-2271442;2271444-2271530	2271443-2271443
672	OAZ1	ENSG00000104904.12	ENSG00000104904.12:t:2271319-2271442	0.0002;0.0002;0.0002;-0.0012	6.591e-04;6.591e-04;6.591e-04;5.597e-03	7.605e-01;7.605e-01;7.605e-01;4.005e-01	0.0208;0.0208;0.0208;0.9375	0.0295;0.0295;0.0295;0.9115	t|1e1.1o1|1e2.1o1|2e1.1o1|i	4	3	0;0;0;0	chr19	+	2269744-2271385;2270676-2271385;2269744-2271391;2270677-2271318	2269509-2269744;2270291-2270676;2271319-2271442	2270677-2271318
673	OAZ1	ENSG00000104904.12	ENSG00000104904.12:t:2271782-2272262	-0.0002;-0.0002;0.0004	1.112e-05;1.112e-05;4.583e-05	9.279e-01;9.279e-01;8.265e-01	0.0132;0.0132;0.9737	0.0113;0.0113;0.9774	t|1e1.1o1|1e2.1o1|i	3	3	0;0;0	chr19	+	2269744-2271782;2271530-2271782;2271531-2271781	2269509-2269744;2271444-2271530;2271782-2272262	2271531-2271781
674	ATE1	ENSG00000107669.19	ENSG00000107669.19:s:121741854-121743858	-0.0005;0.0005	1.955e-04;1.955e-04	7.937e-01;7.937e-01	0.0263;0.9737	0.0208;0.9792	s|1e1.1o1|i	2	2	0;0	chr10	-	121741489-121743659;121741490-121741853	121740424-121741489;121741854-121743858	121741490-121741853
675	SLC38A1	ENSG00000111371.16	ENSG00000111371.16:s:46268860-46269130	-0.0001;-0.0001;-0.0001;0.0004	1.237e-06;1.237e-06;1.237e-06;1.157e-05	9.714e-01;9.714e-01;9.714e-01;8.723e-01	0.0077;0.0077;0.0077;0.9769	0.0063;0.0063;0.0063;0.9812	s|1e1.1o1|1e2.1o1|1e3.1o1|i	4	4	0;0;0;0	chr12	-	46243314-46268865;46239893-46268865;46229639-46268865;46268807-46268859	46229564-46229639;46239679-46239895;46243200-46243314;46268860-46269130	46268807-46268859
676	EIF4G1	ENSG00000114867.22	ENSG00000114867.22:s:184315164-184315545	-0.0001;-0.0001;0.0001	4.872e-04;4.872e-04;1.926e-03	7.541e-01;7.541e-01;5.381e-01	0.0256;0.0256;0.9487	0.0275;0.0275;0.9451	s|1e1.1o1|1e2.1o1|i	3	3	0;0;0	chr3	+	184315545-184315763;184315545-184317321;184315546-184315762	184315164-184315545;184315763-184315856;184317321-184317497	184315546-184315762
677	EIF4G1	ENSG00000114867.22	ENSG00000114867.22:t:184315763-184315856	-0.0001;-0.0001;0.0001	4.872e-04;4.872e-04;1.926e-03	7.541e-01;7.541e-01;5.381e-01	0.0256;0.0256;0.9487	0.0275;0.0275;0.9451	t|1e1.1o1|1e2.1o1|i	3	3	0;0;0	chr3	+	184314674-184315763;184315545-184315763;184315546-184315762	184314495-184314674;184315164-184315545;184315763-184315856	184315546-184315762
678	AKT3	ENSG00000117020.19	ENSG00000117020.19:t:243499719-243499786	-0.0001;-0.0001;-0.0001;0.0005	1.592e-06;1.592e-06;1.592e-06;1.480e-05	9.692e-01;9.692e-01;9.692e-01;8.642e-01	0.0081;0.0081;0.0081;0.9758	0.0063;0.0063;0.0063;0.9812	t|1e1.1o1|1e2.1o2|1e2.2o2|i	4	3	0;0;0;0	chr1	-	243499786-243512324;243499786-243504388;243499786-243504348;243499787-243500233	243499719-243499786;243500234-243505334;243512324-243512426	243499787-243500233
679	ZNHIT6	ENSG00000117174.11	ENSG00000117174.11:s:85708054-85708433	-0.0001;0.0001	8.866e-08;8.874e-08	9.788e-01;9.788e-01	0.0100;0.9900	0.0078;0.9922	s|1e1.1o1|i	2	2	0;0	chr1	-	85707936-85708054;85707937-85708053	85707629-85707936;85708054-85708433	85707937-85708053
680	SNRPB	ENSG00000125835.20	ENSG00000125835.20:t:2461634-2461793	-0.0002;0.0002	1.249e-07;1.249e-07	9.812e-01;9.812e-01	0.0100;0.9900	0.0062;0.9938	t|1e1.1o1|i	2	2	0;0	chr20	-	2461793-2462636;2461794-2461917	2461634-2461793;2462636-2462761	2461794-2461917
681	DMTF1	ENSG00000135164.19	ENSG00000135164.19:t:87163495-87163617	0.0000;0.0000;0.0000;0.0000;0.0000;0.0000;-0.0003	9.704e-05;9.704e-05;9.704e-05;9.704e-05;9.704e-05;9.704e-05;2.455e-03	9.086e-01;9.086e-01;9.086e-01;9.086e-01;9.086e-01;9.086e-01;4.826e-01	0.0095;0.0095;0.0095;0.0095;0.0095;0.0095;0.9429	0.0110;0.0110;0.0110;0.0110;0.0110;0.0110;0.9340	t|1e1.1o1|1e2.1o3|1e3.1o1|1e4.1o1|1e5.1o2|1e5.2o2|i	7	6	0;0;0;0;0;0;0	chr7	+	87152555-87163495;87152791-87163495;87154528-87163495;87155497-87163495;87163286-87163495;87163332-87163495;87163333-87163494	87152409-87152555;87152556-87152944;87154390-87154528;87155455-87155559;87162798-87163332;87163495-87163617	87163333-87163494
682	DMTF1	ENSG00000135164.19	ENSG00000135164.19:t:87188039-87188301	0.0000;0.0000;0.0000;-0.0003	2.754e-04;2.754e-04;2.754e-04;2.274e-03	8.187e-01;8.187e-01;8.187e-01;5.016e-01	0.0185;0.0185;0.0185;0.9444	0.0208;0.0208;0.0208;0.9375	t|1e1.1o1|2e1.1o1|3e1.1o1|i	4	2	0;0;0;0	chr7	+	87185980-87188039;87185980-87188092;87185980-87188198;87186176-87188038	87185829-87185980;87188039-87188301	87186176-87188038
683	DMTF1	ENSG00000135164.19	ENSG00000135164.19:t:87195031-87196337	0.0001;0.0001;-0.0002	1.179e-04;1.179e-04;4.683e-04	8.443e-01;8.443e-01;6.750e-01	0.0185;0.0185;0.9630	0.0202;0.0202;0.9596	t|1e1.1o1|1e2.1o1|i	3	3	0;0;0	chr7	+	87194102-87195031;87194828-87195031;87194893-87195030	87193725-87194102;87194684-87194892;87195031-87196337	87194893-87195030
684	MICAL1	ENSG00000135596.18	ENSG00000135596.18:s:109446696-109446772	-0.0002;-0.0002;0.0006	4.761e-04;4.761e-04;1.887e-03	7.551e-01;7.551e-01;5.396e-01	0.0278;0.0278;0.9444	0.0256;0.0256;0.9487	s|1e1.1o2|1e1.2o2|i	3	2	0;0;0	chr6	-	109446412-109446696;109446357-109446696;109446413-109446695	109446136-109446412;109446696-109446772	109446413-109446695
685	MICAL1	ENSG00000135596.18	ENSG00000135596.18:s:109447357-109447440	-0.0000;0.0000	4.868e-04;4.868e-04	7.206e-01;7.206e-01	0.0312;0.9688	0.0312;0.9688	s|1e1.1o1|i	2	2	0;0	chr6	-	109447229-109447357;109447230-109447356	109447073-109447229;109447357-109447440	109447230-109447356
686	MICAL1	ENSG00000135596.18	ENSG00000135596.18:s:109447681-109447722	-0.0000;0.0000	6.235e-04;6.235e-04	6.831e-01;6.831e-01	0.0333;0.9667	0.0385;0.9615	s|1e1.1o1|i	2	2	0;0	chr6	-	109447440-109447681;109447441-109447680	109447357-109447440;109447681-109447722	109447441-109447680
687	MICAL1	ENSG00000135596.18	ENSG00000135596.18:s:109447875-109447963	0.0007;-0.0007	9.093e-04;9.093e-04	6.664e-01;6.664e-01	0.0294;0.9706	0.0436;0.9564	s|1e1.1o1|i	2	2	0;0	chr6	-	109447722-109447875;109447723-109447874	109447681-109447722;109447875-109447963	109447723-109447874
688	MICAL1	ENSG00000135596.18	ENSG00000135596.18:s:109448203-109448393	0.0004;-0.0004	8.059e-04;8.059e-04	6.680e-01;6.680e-01	0.0333;0.9667	0.0401;0.9599	s|1e1.1o1|i	2	2	0;0	chr6	-	109447963-109448203;109447964-109448202	109447875-109447963;109448203-109448393	109447964-109448202
689	ZNF516	ENSG00000101493.11	ENSG00000101493.11:s:76359296-76359565	-0.0003;0.0003	3.661e-04;3.661e-04	7.288e-01;7.288e-01	0.0333;0.9667	0.0286;0.9714	s|1e1.1o1|i	2	2	0;0	chr18	-	76358608-76359296;76358609-76359295	76357682-76358608;76359296-76359565	76358609-76359295
690	NOL4	ENSG00000101746.16	ENSG00000101746.16:s:34223907-34224217	-0.0004;0.0004	3.851e-06;3.851e-06	9.422e-01;9.422e-01	0.0156;0.9844	0.0086;0.9914	s|1e1.1o1|i	2	2	0;0	chr18	-	34223380-34223907;34223472-34223906	34223332-34223471;34223907-34224217	34223472-34223906
691	NOL4	ENSG00000101746.16	ENSG00000101746.16:s:34224644-34224952	-0.0002;-0.0002;0.0005	6.876e-07;6.876e-07;2.970e-06	9.782e-01;9.782e-01;9.394e-01	0.0087;0.0087;0.9827	0.0048;0.0048;0.9903	s|1e1.1o2|1e1.2o2|i	3	2	0;0;0	chr18	-	34224217-34224644;34224214-34224644;34224218-34224643	34223907-34224217;34224644-34224952	34224218-34224643
692	PGK1	ENSG00000102144.15	ENSG00000102144.15:s:78124874-78125051	0.0000;-0.0000	7.518e-04;7.518e-04	6.608e-01;6.608e-01	0.0357;0.9643	0.0385;0.9615	s|1e1.1o1|i	2	2	0;0	chrX	+	78125051-78125327;78125052-78125326	78124874-78125051;78125327-78125425	78125052-78125326
693	UBL4A	ENSG00000102178.13	ENSG00000102178.13:s:154485603-154485649	-0.0004;0.0004	5.079e-06;5.079e-06	9.295e-01;9.295e-01	0.0167;0.9833	0.0111;0.9889	s|1e1.1o1|i	2	2	0;0	chrX	-	154485462-154485603;154485463-154485602	154483717-154485462;154485603-154485649	154485463-154485602
694	ACD	ENSG00000102977.18	ENSG00000102977.18:t:67657986-67658028	-0.0002;-0.0002;-0.0002;0.0008	5.198e-06;5.198e-06;5.198e-06;4.623e-05	9.587e-01;9.587e-01;9.587e-01;8.282e-01	0.0091;0.0091;0.0091;0.9727	0.0065;0.0065;0.0065;0.9804	t|1e1.1o1|1e2.1o1|1e3.1o1|i	4	4	0;0;0;0	chr16	-	67658028-67658720;67658028-67658555;67658028-67658206;67658029-67658061	67657986-67658028;67658062-67658362;67658555-67658641;67658720-67658832	67658029-67658061
695	PRKD2	ENSG00000105287.13	ENSG00000105287.13:s:46716815-46717127	-0.0003;-0.0003;-0.0003;-0.0003;0.0021	1.858e-04;1.858e-04;1.858e-04;1.858e-04;2.544e-03	8.687e-01;8.687e-01;8.687e-01;8.687e-01;4.984e-01	0.0182;0.0182;0.0182;0.0182;0.9273	0.0105;0.0105;0.0105;0.0105;0.9579	s|1e1.1o3|1e1.2o3|1e1.3o3|2e1.1o3|i	5	2	0;0;0;0;0	chr19	-	46716535-46716951;46716259-46716951;46716220-46716951;46716535-46716815;46716536-46716814	46716131-46716535;46716815-46717127	46716536-46716814
696	ZNF175	ENSG00000105497.8	ENSG00000105497.8:t:51589548-51592510	-0.0010;0.0010	8.667e-04;8.667e-04	6.661e-01;6.661e-01	0.0417;0.9583	0.0303;0.9697	t|1e1.1o1|i	2	2	0;0	chr19	+	51581882-51589548;51587363-51589547	51581787-51581882;51589548-51592510	51587363-51589547
697	RPL18A	ENSG00000105640.13	ENSG00000105640.13:s:17860763-17861307	-0.0000;0.0000	2.247e-21;7.327e-15	9.998e-01;9.998e-01	0.0037;0.9963	0.0016;0.9984	s|1e1.1o1|i	2	2	0;0	chr19	+	17861307-17861425;17861308-17861332	17860763-17861307;17861333-17861472	17861308-17861332
698	RASA4	ENSG00000105808.19	ENSG00000105808.19:s:102594492-102594559	-0.0007;0.0007	1.636e-05;1.636e-05	9.102e-01;9.102e-01	0.0200;0.9800	0.0101;0.9899	s|1e1.1o1|i	2	2	0;0	chr7	-	102594242-102594492;102594461-102594491	102594050-102594242;102594492-102594559	102594461-102594491
699	EXOSC3	ENSG00000107371.14	ENSG00000107371.14:s:37780588-37780880	-0.0001;-0.0001;0.0003	1.543e-05;1.543e-05;6.310e-05	9.199e-01;9.199e-01;8.106e-01	0.0131;0.0131;0.9738	0.0119;0.0119;0.9762	s|1e1.1o1|1e2.1o1|i	3	3	0;0;0	chr9	-	37780358-37780658;37762193-37780658;37780359-37780587	37761975-37762193;37779714-37780358;37780588-37780880	37780359-37780587
700	EXOSC3	ENSG00000107371.14	ENSG00000107371.14:t:37780588-37780880	-0.0002;-0.0002;0.0005	6.084e-04;6.084e-04;2.410e-03	7.357e-01;7.357e-01;5.127e-01	0.0290;0.0290;0.9419	0.0267;0.0267;0.9466	t|1e1.1o1|1e2.1o1|i	3	3	0;0;0	chr9	-	37780880-37783914;37780880-37781986;37780881-37781276	37780588-37780880;37781277-37782137;37783872-37784063	37780881-37781276
701	C19orf25	ENSG00000119559.17	ENSG00000119559.17:s:1475146-1475514	-0.0000;0.0000	1.952e-05;1.952e-05	8.829e-01;8.829e-01	0.0182;0.9818	0.0170;0.9830	s|1e1.1o1|i	2	2	0;0	chr19	-	1475054-1475146;1475055-1475145	1473201-1475054;1475146-1475514	1475055-1475145
702	TBC1D20	ENSG00000125875.15	ENSG00000125875.15:s:437426-437598	-0.0001;-0.0001;-0.0001;-0.0001;-0.0001;-0.0001;0.0010	9.264e-06;9.264e-06;9.264e-06;9.264e-06;9.264e-06;9.264e-06;2.517e-04	9.619e-01;9.619e-01;9.619e-01;9.619e-01;9.619e-01;9.619e-01;6.953e-01	0.0070;0.0070;0.0070;0.0070;0.0070;0.0070;0.9582	0.0056;0.0056;0.0056;0.0056;0.0056;0.0056;0.9664	s|1e1.1o1|1e2.2o3|1e2.3o3|1e3.1o1|2e2.1o3|2e2.2o3|i	7	4	0;0;0;0;0;0;0	chr20	-	436706-437440;435970-437440;435867-437440;424274-437440;436244-437426;435970-437426;436707-437425	423596-424274;435480-436244;436283-436706;437426-437598	436707-437425
703	TBC1D20	ENSG00000125875.15	ENSG00000125875.15:s:437862-438841	-0.0004;-0.0004;0.0010	3.993e-05;3.993e-05;1.613e-04	8.974e-01;8.974e-01;7.668e-01	0.0180;0.0180;0.9639	0.0108;0.0108;0.9785	s|1e1.1o1|2e1.1o1|i	3	2	0;0;0	chr20	-	437598-438550;437598-437862;437599-437861	437426-437598;437862-438841	437599-437861
704	ACAP3	ENSG00000131584.19	ENSG00000131584.19:s:1299345-1299617	0.0004;-0.0004	2.950e-04;2.950e-04	7.497e-01;7.497e-01	0.0257;0.9743	0.0345;0.9655	s|1e1.1o1|i	2	2	0;0	chr1	-	1298679-1299345;1298956-1299344	1298567-1298679;1299345-1299617	1298956-1299344
705	ACAP3	ENSG00000131584.19	ENSG00000131584.19:s:1299831-1299905	-0.0003;0.0003	1.789e-04;1.789e-04	7.879e-01;7.879e-01	0.0263;0.9737	0.0238;0.9762	s|1e1.1o1|i	2	2	0;0	chr1	-	1299356-1299831;1299618-1299830	1299345-1299617;1299831-1299905	1299618-1299830
706	ACAP3	ENSG00000131584.19	ENSG00000131584.19:s:1304086-1305929	-0.0000;0.0000	7.250e-05;7.250e-05	8.289e-01;8.289e-01	0.0227;0.9773	0.0238;0.9762	s|1e1.1o1|i	2	2	0;0	chr1	-	1303281-1304086;1303282-1304085	1303162-1303281;1304086-1305929	1303282-1304085
707	ACAP3	ENSG00000131584.19	ENSG00000131584.19:t:1298567-1298679	-0.0000;0.0000	6.086e-05;6.086e-05	8.378e-01;8.378e-01	0.0208;0.9792	0.0222;0.9778	t|1e1.1o1|i	2	2	0;0	chr1	-	1298679-1299345;1298680-1298743	1298567-1298679;1299345-1299617	1298680-1298743
708	HNRNPH3	ENSG00000096746.18	ENSG00000096746.18:s:68341174-68341309	-0.0003;0.0003	6.959e-04;6.959e-04	6.737e-01;6.737e-01	0.0357;0.9643	0.0357;0.9643	s|1e1.1o1|i	2	2	0;0	chr10	+	68341309-68341585;68341310-68341584	68341174-68341309;68341585-68341680	68341310-68341584
709	PCNX1	ENSG00000100731.16	ENSG00000100731.16:s:71109795-71109831	-0.0002;0.0002	1.583e-06;1.583e-06	9.457e-01;9.457e-01	0.0138;0.9862	0.0110;0.9890	s|1e1.1o1|i	2	2	0;0	chr14	+	71109831-71109983;71109832-71109982	71109795-71109831;71109983-71115382	71109832-71109982
710	CDK16	ENSG00000102225.17	ENSG00000102225.17:t:47229020-47229251	-0.0002;0.0002	1.634e-05;1.634e-05	8.907e-01;8.907e-01	0.0185;0.9815	0.0152;0.9848	t|1e1.1o1|i	2	2	0;0	chrX	+	47228644-47229020;47228992-47229019	47228204-47228644;47229020-47229251	47228992-47229019
711	CDK16	ENSG00000102225.17	ENSG00000102225.17:t:47229371-47229997	-0.0000;0.0000	7.444e-06;7.444e-06	9.104e-01;9.104e-01	0.0156;0.9844	0.0153;0.9847	t|1e1.1o1|i	2	2	0;0	chrX	+	47226909-47229371;47229252-47229370	47226812-47226909;47229371-47229997	47229252-47229370
712	USP34	ENSG00000115464.15	ENSG00000115464.15:s:61190271-61190414	-0.0004;0.0004	1.834e-04;1.834e-04	7.838e-01;7.838e-01	0.0278;0.9722	0.0233;0.9767	s|1e1.1o1|i	2	2	0;0	chr2	-	61189069-61190271;61189797-61190270	61188910-61189069;61190271-61190414	61189797-61190270
713	USP34	ENSG00000115464.15	ENSG00000115464.15:t:61214060-61214278	-0.0001;-0.0001;0.0002	2.864e-07;2.864e-07;1.268e-06	9.774e-01;9.774e-01;9.369e-01	0.0078;0.0078;0.9843	0.0070;0.0070;0.9860	t|1e1.1o1|2e2.1o1|i	3	3	0;0;0	chr2	-	61214278-61220310;61214218-61214628;61214279-61214599	61214060-61214278;61214600-61214694;61220193-61220368	61214279-61214599
714	MAD2L2	ENSG00000116670.15	ENSG00000116670.15:s:11676046-11676140	0.0008;-0.0008	1.849e-03;1.849e-03	5.763e-01;5.763e-01	0.0390;0.9610	0.0625;0.9375	s|1e1.1o1|i	2	2	0;0	chr1	-	11675731-11676046;11675732-11676045	11675656-11675731;11676046-11676140	11675732-11676045
715	C1orf198	ENSG00000119280.17	ENSG00000119280.17:t:230868180-230868402	-0.0001;-0.0001;0.0002	3.845e-07;3.845e-07;1.701e-06	9.737e-01;9.737e-01;9.277e-01	0.0084;0.0084;0.9831	0.0069;0.0069;0.9861	t|1e1.1o1|2e1.1o1|i	3	2	0;0;0	chr1	-	230868402-230868812;230868390-230868812;230868403-230868442	230868180-230868402;230868812-230868998	230868403-230868442
716	CCDC18	ENSG00000122483.18	ENSG00000122483.18:s:93179919-93180279	-0.0006;0.0006	8.135e-06;8.135e-06	9.379e-01;9.379e-01	0.0159;0.9841	0.0079;0.9921	s|1e1.1o1|i	2	2	0;0	chr1	+	93180279-93183360;93180280-93180362	93179919-93180279;93183360-93183495	93180280-93180362
717	CBX3	ENSG00000122565.19	ENSG00000122565.19:s:26201745-26201826	-0.0006;0.0006	3.769e-04;3.769e-04	7.369e-01;7.369e-01	0.0333;0.9667	0.0270;0.9730	s|1e1.1o1|i	2	2	0;0	chr7	+	26201826-26202971;26201827-26202462	26201745-26201826;26202971-26203022	26201827-26202462
718	CBX3	ENSG00000122565.19	ENSG00000122565.19:t:26202971-26203022	0.0002;0.0002;0.0002;-0.0008	3.977e-05;3.977e-05;3.977e-05;3.398e-04	9.115e-01;9.115e-01;9.115e-01;6.936e-01	0.0100;0.0100;0.0100;0.9700	0.0147;0.0147;0.0147;0.9559	t|1e1.1o1|1e2.1o1|1e3.1o1|i	4	4	0;0;0;0	chr7	+	26201561-26202971;26201826-26202971;26202609-26202971;26202610-26202970	26201162-26201561;26201745-26201826;26202463-26202609;26202971-26203022	26202610-26202970
719	CBX3	ENSG00000122565.19	ENSG00000122565.19:t:26208466-26208555	-0.0002;0.0002	1.345e-07;1.345e-07	9.824e-01;9.824e-01	0.0096;0.9904	0.0054;0.9946	t|1e1.1o1|i	2	2	0;0	chr7	+	26206510-26208466;26208413-26208465	26206036-26206510;26208466-26208555	26208413-26208465
720	OBSL1	ENSG00000124006.15	ENSG00000124006.15:s:219571394-219571859	0.0000;0.0000;0.0000;-0.0002	8.664e-06;8.664e-06;8.664e-06;7.685e-05	9.439e-01;9.439e-01;9.439e-01;7.828e-01	0.0093;0.0093;0.0093;0.9722	0.0104;0.0104;0.0104;0.9688	s|1e1.1o2|1e1.2o2|1e2.1o1|i	4	3	0;0;0;0	chr2	-	219570692-219571394;219570575-219571394;219568324-219571394;219571290-219571393	219568055-219568324;219570221-219571289;219571394-219571859	219571290-219571393
721	MRPL35	ENSG00000132313.15	ENSG00000132313.15:s:86210480-86211045	-0.0000;-0.0000;0.0001	2.769e-05;2.769e-05;1.126e-04	8.980e-01;8.980e-01;7.690e-01	0.0148;0.0148;0.9704	0.0152;0.0152;0.9697	s|1e1.1o1|1e2.1o1|i	3	3	0;0;0	chr2	+	86210613-86212426;86210613-86213628;86211046-86212425	86210480-86211045;86212426-86212838;86213628-86213790	86211046-86212425
722	MRPL35	ENSG00000132313.15	ENSG00000132313.15:t:86213628-86213790	0.0007;-0.0007	1.026e-03;1.026e-03	6.536e-01;6.536e-01	0.0312;0.9688	0.0455;0.9545	t|1e1.1o1|i	2	2	0;0	chr2	+	86210613-86213628;86212839-86213627	86210480-86211045;86213628-86213790	86212839-86213627
723	RFXAP	ENSG00000133111.4	ENSG00000133111.4:s:36827643-36827749	-0.0002;0.0002	2.345e-04;2.345e-04	7.597e-01;7.597e-01	0.0286;0.9714	0.0286;0.9714	s|1e1.1o1|i	2	2	0;0	chr13	+	36827749-36828336;36827750-36828335	36827643-36827749;36828336-36828358	36827750-36828335
724	RFXAP	ENSG00000133111.4	ENSG00000133111.4:s:36828336-36828358	-0.0010;0.0010	6.463e-04;6.463e-04	6.901e-01;6.901e-01	0.0417;0.9583	0.0294;0.9706	s|1e1.1o1|i	2	2	0;0	chr13	+	36828358-36828804;36828359-36828803	36828336-36828358;36828804-36829104	36828359-36828803
725	TMEM8B	ENSG00000137103.20	ENSG00000137103.20:s:35829228-35829391	-0.0002;-0.0002;-0.0002;0.0008	2.617e-06;2.617e-06;2.617e-06;2.361e-05	9.704e-01;9.704e-01;9.704e-01;8.683e-01	0.0083;0.0083;0.0083;0.9750	0.0054;0.0054;0.0054;0.9837	s|1e1.1o1|1e2.1o1|2e1.1o1|i	4	3	0;0;0;0	chr9	+	35829319-35829877;35829319-35835288;35829391-35829877;35829392-35829497	35829228-35829391;35829498-35829955;35835288-35835441	35829392-35829497
726	USP3	ENSG00000140455.17	ENSG00000140455.17:s:63593782-63593915	-0.0005;0.0005	1.292e-04;1.292e-04	8.089e-01;8.089e-01	0.0263;0.9737	0.0217;0.9783	s|1e1.1o1|i	2	2	0;0	chr15	+	63593915-63594429;63593916-63594428	63593782-63593915;63594429-63594640	63593916-63594428
727	ISG20L2	ENSG00000143319.17	ENSG00000143319.17:s:156728354-156728766	-0.0004;-0.0004;-0.0004;0.0019	3.190e-04;3.190e-04;3.190e-04;2.655e-03	8.165e-01;8.165e-01;8.165e-01;4.937e-01	0.0227;0.0227;0.0227;0.9318	0.0152;0.0152;0.0152;0.9545	s|1e1.1o2|1e1.2o2|2e1.2o2|i	4	2	0;0;0;0	chr1	-	156727808-156728415;156727769-156728415;156727769-156728354;156727809-156728353	156726906-156727808;156728354-156728766	156727809-156728353
728	SMARCA2	ENSG00000080503.24	ENSG00000080503.24:s:2039466-2039900	-0.0002;-0.0002;0.0004	1.410e-04;1.410e-04;5.581e-04	8.276e-01;8.276e-01;6.493e-01	0.0230;0.0230;0.9540	0.0208;0.0208;0.9583	s|1e1.1o1|1e2.1o1|i	3	3	0;0;0	chr9	+	2039900-2041331;2039900-2047229;2039901-2041330	2039466-2039900;2041331-2046037;2047229-2047954	2039901-2041330
729	SMARCA2	ENSG00000080503.24	ENSG00000080503.24:s:2086829-2086897	-0.0002;0.0002	7.750e-08;7.754e-08	9.830e-01;9.830e-01	0.0101;0.9899	0.0061;0.9939	s|1e1.1o1|i	2	2	0;0	chr9	+	2086897-2088500;2086898-2087021	2086829-2086897;2088500-2088613	2086898-2087021
730	ZNF506	ENSG00000081665.14	ENSG00000081665.14:s:19792411-19792484	-0.0001;-0.0001;0.0003	4.204e-04;4.204e-04;1.661e-03	7.658e-01;7.658e-01;5.546e-01	0.0238;0.0238;0.9524	0.0256;0.0256;0.9487	s|1e2.1o1|2e1.1o1|i	3	3	0;0;0	chr19	-	19791043-19792461;19791731-19792411;19791732-19792410	19790972-19791043;19791562-19791731;19792411-19792484	19791732-19792410
731	ZNF264	ENSG00000083844.10	ENSG00000083844.10:s:57191537-57191790	-0.0002;0.0002	4.490e-06;4.489e-06	9.264e-01;9.264e-01	0.0154;0.9846	0.0128;0.9872	s|1e1.1o1|i	2	2	0;0	chr19	+	57191790-57191874;57191791-57191873	57191537-57191790;57191874-57191946	57191791-57191873
732	NECAP1	ENSG00000089818.18	ENSG00000089818.18:s:8090195-8090815	-0.0000;-0.0000;-0.0000;-0.0000;-0.0000;0.0002	2.964e-04;2.964e-04;2.964e-04;2.964e-04;2.964e-04;5.722e-03	8.492e-01;8.492e-01;8.492e-01;8.492e-01;8.492e-01;3.856e-01	0.0152;0.0152;0.0152;0.0152;0.0152;0.9242	0.0159;0.0159;0.0159;0.0159;0.0159;0.9205	s|1e1.1o2|1e1.2o2|1e2.1o1|1e3.1o1|2e2.1o1|i	6	4	0;0;0;0;0;0	chr12	+	8090299-8091769;8090299-8091840;8090299-8092676;8090299-8092872;8090343-8092676;8090816-8091768	8090195-8090815;8091769-8091850;8092676-8092784;8092872-8093818	8090816-8091768
733	NAT14	ENSG00000090971.5	ENSG00000090971.5:t:55487129-55487568	-0.0000;-0.0000;-0.0000;0.0002	1.107e-04;1.107e-04;1.107e-04;9.231e-04	8.693e-01;8.693e-01;8.693e-01;5.983e-01	0.0156;0.0156;0.0156;0.9531	0.0167;0.0167;0.0167;0.9500	t|1e1.2o3|2e1.1o3|3e2.1o1|i	4	3	0;0;0;0	chr19	+	55485729-55487129;55485718-55487234;55486860-55487278;55486861-55487128	55485661-55485780;55486408-55486860;55487129-55487568	55486861-55487128
734	SMPD3	ENSG00000103056.12	ENSG00000103056.12:s:68372292-68372387	-0.0000;0.0000	9.578e-10;1.034e-09	9.938e-01;9.938e-01	0.0071;0.9929	0.0055;0.9945	s|1e1.1o1|i	2	2	0;0	chr16	-	68371092-68372292;68372259-68372291	68370859-68371092;68372292-68372387	68372259-68372291
735	SMPD3	ENSG00000103056.12	ENSG00000103056.12:t:68370859-68371092	-0.0001;0.0001	1.301e-08;1.309e-08	9.880e-01;9.880e-01	0.0088;0.9912	0.0059;0.9941	t|1e1.1o1|i	2	2	0;0	chr16	-	68371092-68372292;68371093-68371900	68370859-68371092;68372292-68372387	68371093-68371900
736	STX1A	ENSG00000106089.12	ENSG00000106089.12:t:73700729-73700794	-0.0001;0.0001	1.530e-07;1.530e-07	9.779e-01;9.779e-01	0.0101;0.9899	0.0073;0.9927	t|1e1.1o2|i	2	2	0;0	chr7	-	73700794-73702845;73700795-73700804	73700729-73700794;73702537-73702982	73700795-73700804
737	FKTN	ENSG00000106692.15	ENSG00000106692.15:s:105635051-105636200	-0.0000;-0.0000;-0.0000;-0.0000;0.0001	2.153e-04;2.153e-04;2.153e-04;2.153e-04;2.888e-03	8.522e-01;8.522e-01;8.522e-01;8.522e-01;4.695e-01	0.0143;0.0143;0.0143;0.0143;0.9429	0.0182;0.0182;0.0182;0.0182;0.9273	s|1e1.1o1|1e2.1o1|1e3.1o1|1e4.1o1|i	5	5	0;0;0;0;0	chr9	+	105635148-105636673;105635148-105640101;105635148-105644704;105635148-105652072;105636201-105636672	105635051-105636200;105636673-105640018;105640101-105641118;105644704-105645424;105652072-105653820	105636201-105636672
738	DNAJC4	ENSG00000110011.14	ENSG00000110011.14:s:64233492-64233980	-0.0008;0.0008	1.055e-03;1.055e-03	6.354e-01;6.354e-01	0.0477;0.9523	0.0357;0.9643	s|1e1.1o1|i	2	2	0;0	chr11	+	64233980-64234073;64233981-64234072	64233492-64233980;64234073-64234286	64233981-64234072
739	ABCC5	ENSG00000114770.17	ENSG00000114770.17:t:183983753-183984894	-0.0001;-0.0001;0.0003	6.403e-05;6.403e-05;2.564e-04	8.696e-01;8.696e-01;7.180e-01	0.0175;0.0175;0.9649	0.0167;0.0167;0.9667	t|1e1.1o1|1e2.1o1|i	3	3	0;0;0	chr3	-	183984894-183987770;183984894-183985304;183984895-183985303	183983753-183984894;183985304-183985455;183987770-183987917	183984895-183985303
740	ZNF430	ENSG00000118620.13	ENSG00000118620.13:s:21056631-21057904	-0.0007;0.0007	5.057e-05;5.057e-05	8.594e-01;8.594e-01	0.0244;0.9756	0.0145;0.9855	s|1e1.1o1|i	2	2	0;0	chr19	+	21057904-21058071;21057905-21058070	21056631-21057904;21058071-21060050	21057905-21058070
741	PSME3	ENSG00000131467.12	ENSG00000131467.12:s:42833142-42833505	-0.0006;0.0006	1.264e-05;1.264e-05	9.132e-01;9.132e-01	0.0179;0.9821	0.0117;0.9883	s|1e1.1o1|i	2	2	0;0	chr17	+	42833505-42834344;42833506-42833548	42833142-42833505;42834344-42834376	42833506-42833548
742	KLHL36	ENSG00000135686.13	ENSG00000135686.13:t:84659760-84659917	-0.0005;-0.0005;0.0013	6.525e-04;6.525e-04;2.585e-03	7.285e-01;7.285e-01;5.033e-01	0.0333;0.0333;0.9333	0.0256;0.0256;0.9487	t|1e1.2o2|1e2.1o1|i	3	3	0;0;0	chr16	+	84657944-84659760;84659630-84659760;84659631-84659759	84657903-84657944;84659539-84659630;84659760-84659917	84659631-84659759
743	YIPF3	ENSG00000137207.12	ENSG00000137207.12:s:43513588-43513838	-0.0015;0.0015	1.076e-03;1.076e-03	6.597e-01;6.597e-01	0.0455;0.9545	0.0263;0.9737	s|1e1.1o1|i	2	2	0;0	chr6	-	43513451-43513588;43513452-43513587	43513359-43513451;43513588-43513838	43513452-43513587
744	YIPF3	ENSG00000137207.12	ENSG00000137207.12:t:43513069-43513098	-0.0002;0.0002	9.106e-08;9.104e-08	9.812e-01;9.812e-01	0.0102;0.9898	0.0061;0.9939	t|1e1.1o1|i	2	2	0;0	chr6	-	43513098-43513359;43513099-43513141	43513069-43513098;43513359-43513451	43513099-43513141
745	TJAP1	ENSG00000137221.14	ENSG00000137221.14:s:43504761-43505660	-0.0003;0.0003	2.654e-04;2.654e-04	7.620e-01;7.620e-01	0.0278;0.9722	0.0250;0.9750	s|1e1.1o1|i	2	2	0;0	chr6	+	43505660-43506449;43505661-43506448	43504761-43505660;43506449-43506556	43505661-43506448
746	CCDC90B	ENSG00000137500.10	ENSG00000137500.10:s:83285553-83286085	-0.0001;-0.0001;-0.0001;-0.0001;-0.0001;0.0012	1.718e-04;1.718e-04;1.718e-04;1.718e-04;1.718e-04;3.258e-03	8.754e-01;8.754e-01;8.754e-01;8.754e-01;8.754e-01;4.510e-01	0.0159;0.0159;0.0159;0.0159;0.0159;0.9205	0.0128;0.0128;0.0128;0.0128;0.0128;0.9359	s|1e1.1o1|1e2.1o1|1e3.2o2|2e2.1o1|2e3.2o2|i	6	4	0;0;0;0;0;0	chr11	-	83285211-83285873;83280260-83285873;83274740-83285873;83280260-83285553;83274740-83285553;83285212-83285552	83274177-83274763;83280141-83280260;83285127-83285211;83285553-83286085	83285212-83285552
747	CMTM1	ENSG00000089505.18	ENSG00000089505.18:s:66566393-66566612	-0.0001;-0.0001;-0.0001;-0.0001;-0.0001;-0.0001;0.0012	3.571e-05;3.571e-05;3.571e-05;3.571e-05;3.571e-05;3.571e-05;9.481e-04	9.422e-01;9.422e-01;9.422e-01;9.422e-01;9.422e-01;9.422e-01;5.988e-01	0.0084;0.0084;0.0084;0.0084;0.0084;0.0084;0.9496	0.0068;0.0068;0.0068;0.0068;0.0068;0.0068;0.9592	s|1e1.1o1|1e2.2o2|1e3.1o2|1e3.2o2|1e4.2o2|2e3.1o2|i	7	5	0;0;0;0;0;0;0	chr16	+	66566594-66569936;66566594-66571151;66566594-66577104;66566594-66577129;66566594-66578847;66566612-66577104;66566613-66566746	66566393-66566612;66569936-66570094;66571137-66571270;66577104-66577202;66578831-66579137	66566613-66566746
748	GPATCH2L	ENSG00000089916.18	ENSG00000089916.18:s:76153646-76154756	-0.0002;0.0002	7.171e-08;7.167e-08	9.817e-01;9.817e-01	0.0104;0.9896	0.0064;0.9936	s|1e1.1o1|i	2	2	0;0	chr14	+	76154756-76154880;76154757-76154879	76153646-76154756;76154880-76155025	76154757-76154879
749	TSC22D1	ENSG00000102804.15	ENSG00000102804.15:s:44574412-44576565	-0.0001;0.0001	3.562e-08;3.565e-08	9.867e-01;9.867e-01	0.0089;0.9911	0.0057;0.9943	s|1e1.1o1|i	2	2	0;0	chr13	-	44434014-44574412;44573523-44574411	44432143-44434014;44574412-44576565	44573523-44574411
750	TSC22D1	ENSG00000102804.15	ENSG00000102804.15:t:44432143-44434014	-0.0000;0.0000	2.247e-21;4.441e-16	9.999e-01;9.999e-01	0.0035;0.9965	0.0012;0.9988	t|1e1.1o1|i	2	2	0;0	chr13	-	44434014-44574412;44434015-44434566	44432143-44434014;44574412-44576565	44434015-44434566
751	RNF40	ENSG00000103549.22	ENSG00000103549.22:s:30774070-30774185	-0.0002;0.0002	2.861e-07;2.861e-07	9.716e-01;9.716e-01	0.0112;0.9888	0.0078;0.9922	s|1e1.1o1|i	2	2	0;0	chr16	+	30774185-30774314;30774186-30774313	30774070-30774185;30774314-30776307	30774186-30774313
752	MED26	ENSG00000105085.11	ENSG00000105085.11:s:16577417-16577682	-0.0006;0.0006	2.184e-04;2.184e-04	7.759e-01;7.759e-01	0.0312;0.9688	0.0227;0.9773	s|1e1.1o1|i	2	2	0;0	chr19	-	16577248-16577605;16577249-16577416	16574907-16577248;16577417-16577682	16577249-16577416
753	EIF3A	ENSG00000107581.13	ENSG00000107581.13:s:119036031-119036268	-0.0000;0.0000	2.497e-09;2.605e-09	9.908e-01;9.908e-01	0.0075;0.9925	0.0066;0.9934	s|1e1.1o1|i	2	2	0;0	chr10	-	119035983-119036031;119035984-119036030	119033670-119035983;119036031-119036268	119035984-119036030
754	OCIAD1	ENSG00000109180.15	ENSG00000109180.15:s:48831153-48831253	-0.0001;-0.0001;-0.0001;-0.0001;0.0006	4.118e-06;4.118e-06;4.118e-06;4.118e-06;6.088e-05	9.644e-01;9.644e-01;9.644e-01;9.644e-01;7.957e-01	0.0075;0.0075;0.0075;0.0075;0.9698	0.0062;0.0062;0.0062;0.0062;0.9754	s|1e1.1o1|1e2.1o1|1e3.1o1|2e1.1o1|i	5	4	0;0;0;0;0	chr4	+	48831249-48832620;48831249-48833401;48831249-48842636;48831253-48832620;48831254-48831305	48831153-48831253;48832620-48832761;48833401-48833481;48842636-48842689	48831254-48831305
755	OCIAD1	ENSG00000109180.15	ENSG00000109180.15:s:48851806-48852020	-0.0000;-0.0000;-0.0000;0.0001	5.648e-05;5.648e-05;5.648e-05;4.803e-04	9.000e-01;9.000e-01;9.000e-01;6.656e-01	0.0125;0.0125;0.0125;0.9625	0.0139;0.0139;0.0139;0.9583	s|1e1.1o1|1e2.1o1|2e2.1o1|i	4	3	0;0;0;0	chr4	+	48851975-48857213;48851975-48860725;48852020-48860725;48852021-48852191	48851806-48852020;48855972-48857365;48860725-48861817	48852021-48852191
756	TXNDC15	ENSG00000113621.15	ENSG00000113621.15:s:134899937-134900154	-0.0006;0.0006	3.120e-05;3.120e-05	8.822e-01;8.822e-01	0.0217;0.9783	0.0143;0.9857	s|1e1.1o1|i	2	2	0;0	chr5	+	134900154-134901066;134900155-134901065	134899937-134900154;134901066-134901635	134900155-134901065
757	TMEM59	ENSG00000116209.12	ENSG00000116209.12:s:54053356-54053504	-0.0002;-0.0002;-0.0002;0.0008	7.619e-07;7.619e-07;7.619e-07;7.240e-06	9.799e-01;9.799e-01;9.799e-01;9.050e-01	0.0076;0.0076;0.0076;0.9773	0.0039;0.0039;0.0039;0.9883	s|1e1.1o1|1e2.1o1|1e3.1o1|i	4	4	0;0;0;0	chr1	-	54048682-54053356;54047372-54053356;54045786-54053356;54053205-54053355	54045486-54045786;54047267-54048013;54048650-54048682;54053356-54053504	54053205-54053355
758	EDEM3	ENSG00000116406.20	ENSG00000116406.20:s:184693366-184693432	-0.0003;-0.0003;0.0007	3.611e-06;3.611e-06;1.512e-05	9.581e-01;9.581e-01;8.910e-01	0.0111;0.0111;0.9778	0.0072;0.0072;0.9855	s|1e1.1o1|2e1.1o1|i	3	2	0;0;0	chr1	-	184692145-184693374;184692145-184693366;184692146-184693365	184690237-184692145;184693366-184693432	184692146-184693365
759	EDEM3	ENSG00000116406.20	ENSG00000116406.20:s:184694044-184694472	-0.0003;0.0003	3.867e-06;3.867e-06	9.322e-01;9.322e-01	0.0156;0.9844	0.0115;0.9885	s|1e1.1o1|i	2	2	0;0	chr1	-	184693432-184694044;184693433-184694043	184693366-184693432;184694044-184694472	184693433-184694043
760	PLEKHM2	ENSG00000116786.13	ENSG00000116786.13:s:15727014-15727068	-0.0002;0.0002	1.775e-07;1.775e-07	9.745e-01;9.745e-01	0.0108;0.9892	0.0080;0.9920	s|1e1.1o1|i	2	2	0;0	chr1	+	15727068-15727192;15727069-15727191	15727014-15727068;15727192-15727832	15727069-15727191
761	TMEM214	ENSG00000119777.20	ENSG00000119777.20:s:27040711-27041033	-0.0001;0.0001	8.056e-05;8.056e-05	8.241e-01;8.241e-01	0.0227;0.9773	0.0227;0.9773	s|1e1.1o1|i	2	2	0;0	chr2	+	27040954-27041244;27041034-27041243	27040711-27041033;27041244-27041694	27041034-27041243
762	YIPF4	ENSG00000119820.11	ENSG00000119820.11:t:32307104-32316594	-0.0003;0.0003	9.540e-05;9.540e-05	8.222e-01;8.222e-01	0.0217;0.9783	0.0204;0.9796	t|1e1.1o1|i	2	2	0;0	chr2	+	32301495-32307104;32305867-32307103	32301382-32301495;32307104-32316594	32305867-32307103
763	PFDN5	ENSG00000123349.15	ENSG00000123349.15:s:53295839-53295941	-0.0000;-0.0000;-0.0000;-0.0000;0.0001	4.510e-05;4.510e-05;4.510e-05;4.510e-05;6.209e-04	9.136e-01;9.136e-01;9.136e-01;9.136e-01;6.210e-01	0.0111;0.0111;0.0111;0.0111;0.9556	0.0114;0.0114;0.0114;0.0114;0.9542	s|1e1.1o2|1e1.2o2|1e2.1o2|1e3.1o1|i	5	4	0;0;0;0;0	chr12	+	53295941-53296219;53295941-53296244;53295941-53296430;53295941-53297850;53295942-53296047	53295839-53295941;53296048-53296275;53296430-53296706;53297788-53297924	53295942-53296047
764	PFDN5	ENSG00000123349.15	ENSG00000123349.15:t:53296048-53296275	-0.0000;-0.0000;-0.0000;0.0001	6.321e-05;6.321e-05;6.321e-05;5.318e-04	8.894e-01;8.894e-01;8.894e-01;6.431e-01	0.0139;0.0139;0.0139;0.9583	0.0143;0.0143;0.0143;0.9571	t|1e2.1o1|2e1.1o1|2e2.1o1|i	4	3	0;0;0;0	chr12	+	53295941-53296219;53295639-53296244;53295941-53296244;53295942-53296047	53295291-53295639;53295839-53295941;53296048-53296275	53295942-53296047
765	RNF114	ENSG00000124226.11	ENSG00000124226.11:t:49952139-49953885	-0.0001;0.0001	5.909e-08;5.914e-08	9.779e-01;9.779e-01	0.0100;0.9900	0.0083;0.9917	t|1e1.2o2|i	2	2	0;0	chr20	+	49946254-49952139;49952129-49952138	49946136-49946254;49952139-49953885	49952129-49952138
766	EMC9	ENSG00000100908.14	ENSG00000100908.14:s:24141348-24141591	-0.0007;-0.0007;0.0019	1.616e-04;1.616e-04;6.447e-04	8.410e-01;8.410e-01;6.664e-01	0.0256;0.0256;0.9487	0.0123;0.0123;0.9753	s|1e1.1o1|2e2.1o1|i	3	3	0;0;0	chr14	-	24141316-24141438;24140965-24141348;24141317-24141347	24140889-24140965;24141107-24141316;24141348-24141591	24141317-24141347
767	PSME2	ENSG00000100911.16	ENSG00000100911.16:t:24145710-24145772	-0.0004;-0.0004;-0.0004;0.0015	1.749e-04;1.749e-04;1.749e-04;1.470e-03	8.552e-01;8.552e-01;8.552e-01;5.652e-01	0.0192;0.0192;0.0192;0.9423	0.0139;0.0139;0.0139;0.9583	t|1e1.1o1|1e2.1o1|2e2.1o1|i	4	3	0;0;0;0	chr14	-	24145772-24146534;24145772-24146208;24145752-24146208;24145773-24145857	24145710-24145772;24146208-24146314;24146534-24146646	24145773-24145857
768	CDIPT	ENSG00000103502.14	ENSG00000103502.14:s:29858506-29858691	-0.0002;0.0002	2.644e-07;2.645e-07	9.733e-01;9.733e-01	0.0112;0.9888	0.0069;0.9931	s|1e1.1o1|i	2	2	0;0	chr16	-	29858417-29858506;29858418-29858505	29858357-29858417;29858506-29858691	29858418-29858505
769	CDIPT	ENSG00000103502.14	ENSG00000103502.14:s:29858728-29859334	-0.0009;0.0009	5.215e-05;5.215e-05	8.753e-01;8.753e-01	0.0238;0.9762	0.0111;0.9889	s|1e1.1o1|i	2	2	0;0	chr16	-	29858691-29859175;29858692-29858727	29858506-29858691;29858728-29859334	29858692-29858727
770	CDIPT	ENSG00000103502.14	ENSG00000103502.14:s:29862975-29863414	-0.0006;-0.0006;0.0014	8.650e-05;8.650e-05;3.470e-04	8.747e-01;8.747e-01;7.242e-01	0.0202;0.0202;0.9596	0.0115;0.0115;0.9770	s|1e1.2o2|2e1.1o2|i	3	2	0;0;0	chr16	-	29862865-29863128;29862869-29862975;29862891-29862974	29862815-29862890;29862975-29863414	29862891-29862974
771	CBL	ENSG00000110395.7	ENSG00000110395.7:t:119307479-119308149	-0.0001;-0.0001;0.0003	1.195e-06;1.195e-06;5.134e-06	9.650e-01;9.650e-01;9.069e-01	0.0094;0.0094;0.9812	0.0078;0.0078;0.9843	t|1e2.1o1|2e1.1o2|i	3	3	0;0;0	chr11	+	119306380-119307479;119299587-119308070;119306381-119307478	119299495-119301887;119306288-119306380;119307479-119308149	119306381-119307478
772	RAD23B	ENSG00000119318.13	ENSG00000119318.13:s:107283137-107283309	-0.0001;0.0001	1.645e-09;1.700e-09	9.944e-01;9.944e-01	0.0071;0.9929	0.0039;0.9961	s|1e1.1o1|i	2	2	0;0	chr9	+	107283309-107283527;107283310-107283526	107283137-107283309;107283527-107283695	107283310-107283526
773	PLCG1	ENSG00000124181.15	ENSG00000124181.15:s:41162958-41162992	0.0006;-0.0006	6.030e-04;6.030e-04	6.989e-01;6.989e-01	0.0263;0.9737	0.0417;0.9583	s|1e1.1o1|i	2	2	0;0	chr20	+	41162992-41163203;41162993-41163173	41162958-41162992;41163174-41163275	41162993-41163173
774	PLCG1	ENSG00000124181.15	ENSG00000124181.15:s:41163174-41163275	0.0004;-0.0004	5.750e-04;5.750e-04	6.944e-01;6.944e-01	0.0294;0.9706	0.0436;0.9564	s|1e1.1o1|i	2	2	0;0	chr20	+	41163275-41163378;41163276-41163377	41163174-41163275;41163378-41163479	41163276-41163377
775	INO80	ENSG00000128908.18	ENSG00000128908.18:s:40979492-40980440	-0.0004;0.0004	4.443e-05;4.443e-05	8.624e-01;8.624e-01	0.0213;0.9787	0.0164;0.9836	s|1e1.1o1|i	2	2	0;0	chr15	-	40979257-40979492;40979258-40979491	40978880-40979257;40979492-40980440	40979258-40979491
776	COPB1	ENSG00000129083.13	ENSG00000129083.13:s:14499707-14499862	-0.0001;-0.0001;0.0003	4.027e-08;4.027e-08;1.859e-07	9.891e-01;9.891e-01;9.675e-01	0.0069;0.0069;0.9861	0.0045;0.0045;0.9911	s|1e1.1o1|2e1.1o1|i	3	2	0;0;0	chr11	-	14498985-14499742;14498985-14499707;14499667-14499706	14498838-14498985;14499707-14499862	14499667-14499706
777	SLC44A2	ENSG00000129353.15	ENSG00000129353.15:s:10634756-10634887	-0.0008;0.0008	1.043e-04;1.043e-04	8.313e-01;8.313e-01	0.0250;0.9750	0.0167;0.9833	s|1e1.1o1|i	2	2	0;0	chr19	+	10634887-10634974;10634888-10634973	10634756-10634887;10634974-10635073	10634888-10634973
778	SLC44A2	ENSG00000129353.15	ENSG00000129353.15:s:10635163-10635255	-0.0004;0.0004	9.327e-04;9.327e-04	6.458e-01;6.458e-01	0.0401;0.9599	0.0385;0.9615	s|1e1.1o1|i	2	2	0;0	chr19	+	10635255-10635431;10635256-10635430	10635163-10635255;10635431-10635515	10635256-10635430
779	SLC44A2	ENSG00000129353.15	ENSG00000129353.15:t:10643279-10644557	-0.0002;-0.0002;0.0006	1.789e-06;1.789e-06;7.652e-06	9.623e-01;9.623e-01;9.008e-01	0.0108;0.0108;0.9785	0.0071;0.0071;0.9858	t|1e1.1o1|1e2.1o1|i	3	3	0;0;0	chr19	+	10642451-10643279;10643021-10643279;10643022-10643278	10642336-10642451;10642897-10643021;10643279-10644557	10643022-10643278
780	COX4I1	ENSG00000131143.10	ENSG00000131143.10:s:85805069-85805426	0.0001;0.0001;0.0001;0.0001;-0.0007	1.537e-04;1.537e-04;1.537e-04;1.537e-04;2.119e-03	8.721e-01;8.721e-01;8.721e-01;8.721e-01;5.100e-01	0.0133;0.0133;0.0133;0.0133;0.9467	0.0154;0.0154;0.0154;0.0154;0.9385	s|1e1.2o2|2e2.1o1|3e1.1o2|4e1.2o2|i	5	3	0;0;0;0;0	chr16	+	85805104-85805733;85805108-85805747;85805151-85805622;85805153-85805733;85805427-85805621	85805069-85805426;85805622-85805742;85805747-85805864	85805427-85805621
781	COX4I1	ENSG00000131143.10	ENSG00000131143.10:s:85805747-85805864	-0.0001;-0.0001;-0.0001;0.0002	1.501e-04;1.501e-04;1.501e-04;1.246e-03	8.515e-01;8.515e-01;8.515e-01;5.633e-01	0.0167;0.0167;0.0167;0.9500	0.0167;0.0167;0.0167;0.9500	s|1e1.1o2|1e1.2o2|1e2.1o1|i	4	3	0;0;0;0	chr16	+	85805864-85806456;85805864-85806738;85805864-85806827;85805865-85806455	85805747-85805864;85806456-85806805;85806827-85807068	85805865-85806455
782	COX4I1	ENSG00000131143.10	ENSG00000131143.10:t:85806827-85807068	-0.0000;0.0000	2.247e-21;2.043e-21	1.000e+00;1.000e+00	0.0030;0.9970	0.0017;0.9983	t|1e1.1o1|i	2	2	0;0	chr16	+	85805864-85806827;85806806-85806826	85805747-85805864;85806827-85807068	85806806-85806826
783	LDHA	ENSG00000134333.14	ENSG00000134333.14:t:18400907-18401025	-0.0000;0.0000	2.247e-21;1.255e-15	9.999e-01;9.999e-01	0.0034;0.9966	0.0024;0.9976	t|1e1.1o2|i	2	2	0;0	chr11	+	18396954-18400907;18400873-18400906	18396818-18397398;18400907-18401025	18400873-18400906
784	LDHA	ENSG00000134333.14	ENSG00000134333.14:t:18407239-18408425	-0.0000;0.0000	2.247e-21;2.464e-15	9.999e-01;9.999e-01	0.0035;0.9965	0.0030;0.9970	t|1e1.1o2|i	2	2	0;0	chr11	+	18403788-18407239;18407159-18407238	18403694-18403811;18407239-18408425	18407159-18407238
785	GRHPR	ENSG00000137106.18	ENSG00000137106.18:t:37436881-37436990	-0.0002;0.0002	7.223e-08;7.223e-08	9.818e-01;9.818e-01	0.0100;0.9900	0.0063;0.9937	t|1e1.2o2|i	2	2	0;0	chr9	+	37431151-37436881;37436849-37436880	37430511-37431719;37436881-37436990	37436849-37436880
786	NFKBIA	ENSG00000100906.11	ENSG00000100906.11:s:35404510-35404749	-0.0002;0.0002	5.975e-06;5.975e-06	9.143e-01;9.143e-01	0.0159;0.9841	0.0145;0.9855	s|1e1.1o1|i	2	2	0;0	chr14	-	35404437-35404510;35404438-35404509	35404418-35404437;35404510-35404749	35404438-35404509
787	NFKBIA	ENSG00000100906.11	ENSG00000100906.11:t:35402394-35402534	-0.0000;0.0000	9.190e-07;9.190e-07	9.543e-01;9.543e-01	0.0112;0.9888	0.0116;0.9884	t|1e1.1o1|i	2	2	0;0	chr14	-	35402534-35402771;35402535-35402652	35402394-35402534;35402771-35402859	35402535-35402652
788	PQBP1	ENSG00000102103.18	ENSG00000102103.18:s:48897481-48898014	-0.0002;0.0002	8.718e-07;8.717e-07	9.554e-01;9.554e-01	0.0125;0.9875	0.0103;0.9897	s|1e1.1o1|i	2	2	0;0	chrX	+	48898014-48898492;48898015-48898040	48897481-48898014;48898492-48898576	48898015-48898040
789	USB1	ENSG00000103005.12	ENSG00000103005.12:s:58002479-58002590	-0.0001;-0.0001;0.0003	2.864e-07;2.864e-07;1.272e-06	9.780e-01;9.780e-01;9.384e-01	0.0081;0.0081;0.9837	0.0060;0.0060;0.9879	s|1e1.1o1|2e2.1o1|i	3	3	0;0;0	chr16	+	58002499-58002616;58002590-58009929;58002591-58002615	58002479-58002590;58002616-58002663;58009929-58010170	58002591-58002615
790	NFKBIB	ENSG00000104825.17	ENSG00000104825.17:s:38907399-38908538	-0.0010;0.0010	7.830e-04;7.830e-04	6.780e-01;6.780e-01	0.0417;0.9583	0.0278;0.9722	s|1e1.1o1|i	2	2	0;0	chr19	+	38907659-38908731;38908539-38908730	38907399-38908538;38908731-38908893	38908539-38908730
791	NOP2	ENSG00000111641.12	ENSG00000111641.12:t:6566529-6566559	0.0000;-0.0000	3.376e-06;3.376e-06	9.283e-01;9.283e-01	0.0141;0.9859	0.0141;0.9859	t|1e1.1o2|i	2	2	0;0	chr12	-	6566559-6566801;6566560-6566575	6566529-6566559;6566777-6566822	6566560-6566575
792	QSOX1	ENSG00000116260.17	ENSG00000116260.17:s:180196262-180196599	-0.0001;0.0001	1.393e-05;1.393e-05	8.940e-01;8.940e-01	0.0170;0.9830	0.0170;0.9830	s|1e1.1o1|i	2	2	0;0	chr1	+	180196599-180197333;180196600-180196681	180196262-180196599;180197333-180204030	180196600-180196681
793	QSOX1	ENSG00000116260.17	ENSG00000116260.17:t:180197333-180204030	-0.0001;-0.0001;0.0003	5.992e-05;5.992e-05;2.403e-04	8.730e-01;8.730e-01;7.239e-01	0.0171;0.0171;0.9658	0.0155;0.0155;0.9690	t|1e1.1o1|1e2.1o1|i	3	3	0;0;0	chr1	+	180196599-180197333;180196890-180197333;180196891-180197332	180196262-180196599;180196682-180196890;180197333-180204030	180196891-180197332
794	CREB1	ENSG00000118260.15	ENSG00000118260.15:s:207529737-207530018	0.0000;-0.0000	4.758e-05;4.758e-05	8.488e-01;8.488e-01	0.0204;0.9796	0.0217;0.9783	s|1e1.1o1|i	2	2	0;0	chr2	+	207530018-207555628;207530019-207530071	207529737-207530018;207555628-207555749	207530019-207530071
795	CREB1	ENSG00000118260.15	ENSG00000118260.15:t:207599080-207605988	-0.0001;-0.0001;0.0002	6.019e-06;6.019e-06;2.516e-05	9.385e-01;9.385e-01;8.485e-01	0.0119;0.0119;0.9762	0.0108;0.0108;0.9785	t|1e1.1o1|1e2.1o1|i	3	3	0;0;0	chr2	+	207597326-207599080;207597483-207599080;207597790-207599079	207597165-207597326;207597348-207597789;207599080-207605988	207597790-207599079
796	KLF7	ENSG00000118263.15	ENSG00000118263.15:t:207165467-207165706	-0.0000;-0.0000;-0.0000;0.0001	5.219e-10;5.219e-10;5.219e-10;7.213e-09	9.974e-01;9.974e-01;9.974e-01;9.843e-01	0.0038;0.0038;0.0038;0.9885	0.0028;0.0028;0.0028;0.9916	t|1e1.2o2|1e2.1o1|1e3.1o1|i	4	4	0;0;0;0	chr2	-	207165706-207166994;207165706-207166757;207165706-207165913;207165707-207165912	207165467-207165706;207165913-207166186;207166757-207166847;207166994-207167267	207165707-207165912
797	RAP2C	ENSG00000123728.10	ENSG00000123728.10:s:132217278-132217367	-0.0004;0.0004	1.436e-04;1.436e-04	7.985e-01;7.985e-01	0.0263;0.9737	0.0222;0.9778	s|1e1.1o1|i	2	2	0;0	chrX	-	132217156-132217278;132217157-132217277	132216996-132217156;132217278-132217367	132217157-132217277
798	RAP2C	ENSG00000123728.10	ENSG00000123728.10:t:132217278-132217367	-0.0009;0.0009	5.430e-04;5.430e-04	7.132e-01;7.132e-01	0.0371;0.9629	0.0257;0.9743	t|1e1.1o1|i	2	2	0;0	chrX	-	132217367-132218232;132217368-132217665	132217278-132217367;132218232-132218341	132217368-132217665
799	ST3GAL3	ENSG00000126091.21	ENSG00000126091.21:t:43920494-43920550	-0.0001;0.0001	1.013e-07;1.014e-07	9.775e-01;9.775e-01	0.0097;0.9903	0.0081;0.9919	t|1e1.1o1|i	2	2	0;0	chr1	+	43899727-43920494;43920486-43920493	43899336-43899727;43920494-43920550	43920486-43920493
800	VPS4A	ENSG00000132612.16	ENSG00000132612.16:s:69321211-69321270	0.0000;0.0000;-0.0002	5.854e-04;5.854e-04;2.352e-03	7.418e-01;7.418e-01;5.184e-01	0.0256;0.0256;0.9487	0.0278;0.0278;0.9444	s|1e1.1o1|1e2.1o1|i	3	3	0;0;0	chr16	+	69321270-69321978;69321270-69322560;69321271-69321977	69321211-69321270;69321978-69322270;69322560-69322700	69321271-69321977
801	VPS4A	ENSG00000132612.16	ENSG00000132612.16:t:69322560-69322700	-0.0001;0.0001	7.023e-06;7.023e-06	9.096e-01;9.096e-01	0.0161;0.9839	0.0161;0.9839	t|1e1.1o1|i	2	2	0;0	chr16	+	69321270-69322560;69322271-69322559	69321211-69321270;69322560-69322700	69322271-69322559
802	MED6	ENSG00000133997.12	ENSG00000133997.12:s:70584525-70584943	-0.0002;-0.0002;0.0005	1.095e-05;1.095e-05;4.509e-05	9.304e-01;9.304e-01;8.315e-01	0.0128;0.0128;0.9744	0.0103;0.0103;0.9795	s|1e1.1o1|1e2.1o1|i	3	3	0;0;0	chr14	-	70584130-70584817;70581488-70584817;70584131-70584524	70581257-70581488;70583221-70584130;70584525-70584943	70584131-70584524
803	TPM1	ENSG00000140416.23	ENSG00000140416.23:s:63060869-63061098	-0.0002;-0.0002;0.0004	4.899e-05;4.899e-05;1.972e-04	8.815e-01;8.815e-01;7.388e-01	0.0163;0.0163;0.9675	0.0145;0.0145;0.9710	s|1e1.1o1|1e2.1o1|i	3	3	0;0;0	chr15	+	63060939-63061198;63060939-63061713;63061099-63061197	63060869-63061098;63061198-63061273;63061713-63061788	63061099-63061197
804	TPM1	ENSG00000140416.23	ENSG00000140416.23:s:63061198-63061273	-0.0000;-0.0000;-0.0000	3.024e-04;3.024e-04;1.193e-03	7.918e-01;7.918e-01;5.921e-01	0.0222;0.0222;0.9556	0.0247;0.0247;0.9505	s|1e1.1o1|1e2.1o1|i	3	3	0;0;0	chr15	+	63061273-63061713;63061273-63062215;63061274-63061712	63061198-63061273;63061713-63061788;63062057-63062332	63061274-63061712
805	TPM1	ENSG00000140416.23	ENSG00000140416.23:t:63061713-63061788	-0.0000;-0.0000;-0.0000;-0.0000	1.883e-04;1.883e-04;1.883e-04;1.559e-03	8.459e-01;8.459e-01;8.459e-01;5.499e-01	0.0167;0.0167;0.0167;0.9500	0.0185;0.0185;0.0185;0.9444	t|1e1.1o2|1e2.1o1|1e3.1o1|i	4	4	0;0;0;0	chr15	+	63059638-63061713;63060939-63061713;63061273-63061713;63061274-63061712	63059563-63059962;63060869-63061098;63061198-63061273;63061713-63061788	63061274-63061712
806	OSGEP	ENSG00000092094.11	ENSG00000092094.11:s:20452276-20452448	0.0000;0.0000;-0.0001	4.550e-04;4.550e-04;1.792e-03	7.546e-01;7.546e-01;5.403e-01	0.0238;0.0238;0.9524	0.0290;0.0290;0.9419	s|1e1.1o1|2e1.1o1|i	3	2	0;0;0	chr14	-	20452149-20452329;20452149-20452276;20452150-20452275	20451959-20452149;20452276-20452448	20452150-20452275
807	THOC5	ENSG00000100296.14	ENSG00000100296.14:s:29544580-29544603	-0.0003;0.0003	3.113e-06;3.113e-06	9.423e-01;9.423e-01	0.0143;0.9857	0.0106;0.9894	s|1e1.1o1|i	2	2	0;0	chr22	-	29544508-29544580;29544509-29544579	29544460-29544508;29544580-29544603	29544509-29544579
808	RBM3	ENSG00000102317.18	ENSG00000102317.18:s:48575561-48575667	0.0000;0.0000;0.0000;0.0000;-0.0002	2.816e-05;2.816e-05;2.816e-05;2.816e-05;3.950e-04	9.299e-01;9.299e-01;9.299e-01;9.299e-01;6.690e-01	0.0093;0.0093;0.0093;0.0093;0.9628	0.0108;0.0108;0.0108;0.0108;0.9567	s|1e2.1o1|2e1.1o2|2e1.2o2|2e2.1o1|i	5	3	0;0;0;0;0	chrX	+	48575630-48576314;48575667-48575815;48575667-48575922;48575667-48576314;48575668-48575814	48575561-48575667;48575815-48576083;48576314-48576419	48575668-48575814
809	RBM3	ENSG00000102317.18	ENSG00000102317.18:s:48577026-48577109	-0.0006;0.0006	1.610e-04;1.610e-04	7.941e-01;7.941e-01	0.0278;0.9722	0.0219;0.9781	s|1e1.1o1|i	2	2	0;0	chrX	+	48577109-48577465;48577110-48577464	48577026-48577109;48577465-48581162	48577110-48577464
810	RBM3	ENSG00000102317.18	ENSG00000102317.18:t:48576314-48576419	0.0002;0.0002;0.0002;0.0002;-0.0013	9.241e-06;9.241e-06;9.241e-06;9.241e-06;1.342e-04	9.602e-01;9.602e-01;9.602e-01;9.602e-01;7.756e-01	0.0049;0.0049;0.0049;0.0049;0.9805	0.0091;0.0091;0.0091;0.0091;0.9636	t|1e1.1o1|1e2.1o2|1e2.2o2|1e3.1o1|i	5	4	0;0;0;0;0	chrX	+	48575283-48576314;48575630-48576314;48575667-48576314;48576083-48576314;48576084-48576313	48574952-48575283;48575561-48575667;48575815-48576083;48576314-48576419	48576084-48576313
811	USP10	ENSG00000103194.16	ENSG00000103194.16:t:84745613-84745673	-0.0001;0.0001	4.455e-08;4.456e-08	9.851e-01;9.851e-01	0.0092;0.9908	0.0058;0.9942	t|1e1.1o2|i	2	2	0;0	chr16	+	84733081-84745613;84745212-84745612	84733053-84733105;84745613-84745673	84745212-84745612
812	EIF3B	ENSG00000106263.19	ENSG00000106263.19:t:2355234-2355420	-0.0001;-0.0001;0.0004	4.166e-07;4.166e-07;1.835e-06	9.754e-01;9.754e-01;9.320e-01	0.0089;0.0089;0.9822	0.0064;0.0064;0.9872	t|1e1.1o1|1e2.1o1|i	3	3	0;0;0	chr7	+	2354195-2355234;2355116-2355234;2355117-2355233	2354086-2354195;2354827-2355116;2355234-2355420	2355117-2355233
813	EIF4H	ENSG00000106682.16	ENSG00000106682.16:s:74195169-74195856	-0.0000;0.0000	6.970e-11;1.155e-10	9.971e-01;9.971e-01	0.0062;0.9938	0.0035;0.9965	s|1e1.1o1|i	2	2	0;0	chr7	+	74195856-74196642;74195857-74196641	74195169-74195856;74196642-74197122	74195857-74196641
814	GBF1	ENSG00000107862.7	ENSG00000107862.7:s:102375320-102375479	-0.0000;-0.0000;0.0001	1.270e-07;1.270e-07;5.777e-07	9.801e-01;9.801e-01;9.435e-01	0.0073;0.0073;0.9853	0.0071;0.0071;0.9858	s|1e1.1o1|1e2.1o2|i	3	3	0;0;0	chr10	+	102375479-102375528;102375479-102376272;102375480-102375527	102375320-102375479;102375528-102375584;102376272-102376432	102375480-102375527
815	GBF1	ENSG00000107862.7	ENSG00000107862.7:s:102382056-102382210	-0.0001;0.0001	3.773e-07;3.772e-07	9.618e-01;9.618e-01	0.0116;0.9884	0.0105;0.9895	s|1e1.1o1|i	2	2	0;0	chr10	+	102382210-102382308;102382211-102382307	102382056-102382210;102382308-102382899	102382211-102382307
816	TBC1D12	ENSG00000108239.9	ENSG00000108239.9:s:94534339-94534455	-0.0004;0.0004	1.936e-04;1.936e-04	7.820e-01;7.820e-01	0.0278;0.9722	0.0233;0.9767	s|1e1.1o1|i	2	2	0;0	chr10	+	94534455-94535627;94534456-94535626	94534339-94534455;94535627-94536332	94534456-94535626
817	CUTA	ENSG00000112514.18	ENSG00000112514.18:s:33416749-33416776	-0.0004;0.0004	1.942e-06;1.942e-06	9.525e-01;9.525e-01	0.0137;0.9863	0.0085;0.9915	s|1e1.1o1|i	2	2	0;0	chr6	-	33416660-33416749;33416661-33416748	33416442-33416660;33416749-33416776	33416661-33416748
818	CCDC88A	ENSG00000115355.18	ENSG00000115355.18:s:55295797-55296056	-0.0000;0.0000	1.571e-10;1.713e-10	9.965e-01;9.965e-01	0.0061;0.9939	0.0051;0.9949	s|1e1.1o1|i	2	2	0;0	chr2	-	55295727-55295950;55295728-55295796	55293553-55295727;55295797-55296056	55295728-55295796
819	CCDC88A	ENSG00000115355.18	ENSG00000115355.18:s:55301206-55301277	-0.0000;-0.0000;-0.0000;-0.0000;0.0001	9.325e-06;9.325e-06;9.325e-06;9.325e-06;1.345e-04	9.507e-01;9.507e-01;9.507e-01;9.507e-01;7.415e-01	0.0077;0.0077;0.0077;0.0077;0.9692	0.0082;0.0082;0.0082;0.0082;0.9673	s|1e1.1o1|1e2.1o1|1e3.1o1|1e4.1o2|i	5	5	0;0;0;0;0	chr2	-	55300996-55301206;55300339-55301206;55299919-55301206;55296523-55301206;55300997-55301205	55296258-55297165;55299828-55299919;55300253-55300339;55300957-55300996;55301206-55301277	55300997-55301205
820	CCDC88A	ENSG00000115355.18	ENSG00000115355.18:t:55287842-55288355	-0.0001;0.0001	1.293e-09;1.300e-09	9.933e-01;9.933e-01	0.0075;0.9925	0.0052;0.9948	t|1e1.1o1|i	2	2	0;0	chr2	-	55288355-55291676;55288356-55289672	55287842-55288355;55291676-55292914	55288356-55289672
821	CCDC88A	ENSG00000115355.18	ENSG00000115355.18:t:55299828-55299919	0.0002;0.0002;0.0002;-0.0008	1.231e-04;1.231e-04;1.231e-04;1.034e-03	8.692e-01;8.692e-01;8.692e-01;5.958e-01	0.0135;0.0135;0.0135;0.9594	0.0179;0.0179;0.0179;0.9464	t|1e1.1o1|1e2.1o1|1e3.1o1|i	4	4	0;0;0;0	chr2	-	55299919-55301206;55299919-55300957;55299919-55300253;55299920-55300252	55299828-55299919;55300253-55300339;55300957-55300996;55301206-55301277	55299920-55300252
822	STK25	ENSG00000115694.15	ENSG00000115694.15:s:241500047-241500244	0.0009;-0.0009	4.441e-04;4.441e-04	7.269e-01;7.269e-01	0.0238;0.9762	0.0385;0.9615	s|1e1.1o1|i	2	2	0;0	chr2	-	241499414-241500173;241499973-241500046	241499323-241499414;241500047-241500244	241499973-241500046
823	STK25	ENSG00000115694.15	ENSG00000115694.15:s:241501528-241501799	-0.0000;0.0000	3.486e-11;7.049e-11	9.971e-01;9.971e-01	0.0060;0.9940	0.0045;0.9955	s|1e1.2o2|i	2	2	0;0	chr2	-	241500796-241501528;241501527-241501527	241500740-241500847;241501528-241501799	241501527-241501527
824	STK25	ENSG00000115694.15	ENSG00000115694.15:t:241499323-241499414	0.0007;-0.0007	4.277e-04;4.277e-04	7.367e-01;7.367e-01	0.0233;0.9767	0.0371;0.9629	t|1e1.1o1|i	2	2	0;0	chr2	-	241499414-241500173;241499415-241499902	241499323-241499414;241500047-241500244	241499415-241499902
825	MED13L	ENSG00000123066.9	ENSG00000123066.9:s:116006807-116007444	-0.0000;0.0000	9.745e-04;9.745e-04	6.412e-01;6.412e-01	0.0385;0.9615	0.0436;0.9564	s|1e1.1o1|i	2	2	0;0	chr12	-	116006411-116007411;116006412-116006806	116006306-116006411;116006807-116007444	116006412-116006806
826	SMARCD1	ENSG00000066117.15	ENSG00000066117.15:s:50098947-50099246	-0.0000;0.0000	6.646e-08;6.651e-08	9.763e-01;9.763e-01	0.0091;0.9909	0.0093;0.9907	s|1e1.1o1|i	2	2	0;0	chr12	+	50099141-50099487;50099247-50099429	50098947-50099246;50099430-50099565	50099247-50099429
827	SMARCD1	ENSG00000066117.15	ENSG00000066117.15:s:50099430-50099565	-0.0000;-0.0000;0.0000	1.009e-07;1.009e-07;4.576e-07	9.824e-01;9.824e-01;9.495e-01	0.0067;0.0067;0.9867	0.0072;0.0072;0.9855	s|1e1.1o1|1e2.1o1|i	3	3	0;0;0	chr12	+	50099565-50099800;50099565-50100054;50099566-50099799	50099430-50099565;50099800-50099844;50100054-50100707	50099566-50099799
828	SMARCD1	ENSG00000066117.15	ENSG00000066117.15:t:50100054-50100707	-0.0000;0.0000	1.213e-08;1.218e-08	9.866e-01;9.866e-01	0.0079;0.9921	0.0074;0.9926	t|1e1.1o1|i	2	2	0;0	chr12	+	50099565-50100054;50099845-50100053	50099430-50099565;50100054-50100707	50099845-50100053
829	PFKP	ENSG00000067057.18	ENSG00000067057.18:s:3068486-3068648	0.0002;-0.0002	1.072e-03;1.072e-03	6.409e-01;6.409e-01	0.0357;0.9643	0.0385;0.9615	s|1e1.1o1|i	2	2	0;0	chr10	+	3068648-3069274;3068649-3068740	3068486-3068648;3069233-3069389	3068649-3068740
830	PRR11	ENSG00000068489.13	ENSG00000068489.13:s:59201563-59201757	-0.0004;-0.0004;0.0010	2.877e-04;2.877e-04;1.138e-03	7.939e-01;7.939e-01;5.957e-01	0.0256;0.0256;0.9487	0.0208;0.0208;0.9583	s|1e1.1o2|2e1.2o2|i	3	2	0;0;0	chr17	+	59201743-59203461;59201757-59203646;59201758-59203460	59201563-59201757;59203461-59206709	59201758-59203460
831	ASNS	ENSG00000070669.17	ENSG00000070669.17:s:97872041-97872165	-0.0002;-0.0002;0.0004	5.232e-06;5.232e-06;2.195e-05	9.417e-01;9.417e-01;8.551e-01	0.0123;0.0123;0.9753	0.0098;0.0098;0.9804	s|1e1.1o1|1e2.1o1|i	3	3	0;0;0	chr7	-	97869813-97872041;97864496-97872041;97871997-97872040	97863096-97864496;97869778-97869977;97872041-97872165	97871997-97872040
832	ASNS	ENSG00000070669.17	ENSG00000070669.17:t:97871681-97871996	-0.0003;0.0003	1.148e-05;1.148e-05	9.011e-01;9.011e-01	0.0185;0.9815	0.0147;0.9853	t|1e1.1o1|i	2	2	0;0	chr7	-	97871996-97872351;97871997-97872040	97871681-97871996;97872351-97872542	97871997-97872040
833	TCF3	ENSG00000071564.17	ENSG00000071564.17:s:1611687-1611849	-0.0000;-0.0000;-0.0000;0.0001	1.216e-10;1.216e-10;1.216e-10;1.923e-09	9.983e-01;9.983e-01;9.983e-01;9.890e-01	0.0034;0.0034;0.0034;0.9899	0.0026;0.0026;0.0026;0.9923	s|1e1.1o1|1e2.1o2|1e2.2o2|i	4	3	0;0;0;0	chr19	-	1611369-1611704;1610500-1611704;1609599-1611704;1611370-1611686	1609290-1610500;1610965-1611369;1611687-1611849	1611370-1611686
834	TCF3	ENSG00000071564.17	ENSG00000071564.17:t:1609290-1610500	-0.0001;-0.0001;0.0002	1.377e-07;1.377e-07;6.199e-07	9.812e-01;9.812e-01;9.465e-01	0.0078;0.0078;0.9843	0.0064;0.0064;0.9872	t|1e1.1o1|2e1.1o1|i	3	2	0;0;0	chr19	-	1610500-1611704;1609599-1611704;1610501-1610964	1609290-1610500;1611687-1611849	1610501-1610964
835	EPN2	ENSG00000072134.16	ENSG00000072134.16:t:19335405-19336715	-0.0003;0.0003	9.712e-07;9.711e-07	9.585e-01;9.585e-01	0.0132;0.9868	0.0087;0.9913	t|1e1.1o1|i	2	2	0;0	chr17	+	19329647-19335405;19335195-19335404	19329082-19329647;19335405-19336715	19335195-19335404
836	SLC25A3	ENSG00000075415.15	ENSG00000075415.15:s:98593591-98593744	-0.0002;-0.0002;-0.0002;0.0011	5.232e-06;5.232e-06;5.232e-06;4.660e-05	9.630e-01;9.630e-01;9.630e-01;8.420e-01	0.0098;0.0098;0.0098;0.9706	0.0052;0.0052;0.0052;0.9843	s|1e1.1o2|1e1.2o2|2e1.1o2|i	4	2	0;0;0;0	chr12	+	98593740-98593975;98593740-98593979;98593744-98593975;98593745-98593974	98593591-98593744;98593975-98594503	98593745-98593974
837	THOC1	ENSG00000079134.13	ENSG00000079134.13:s:225337-226402	-0.0002;0.0002	4.501e-04;4.501e-04	7.160e-01;7.160e-01	0.0312;0.9688	0.0303;0.9697	s|1e1.1o1|i	2	2	0;0	chr18	-	225139-225337;225140-225336	225089-225139;225337-226402	225140-225336
838	FAT1	ENSG00000083857.15	ENSG00000083857.15:s:186597034-186597271	-0.0003;0.0003	1.089e-05;1.089e-05	9.113e-01;9.113e-01	0.0179;0.9821	0.0132;0.9868	s|1e1.1o1|i	2	2	0;0	chr4	-	186595826-186597034;186596842-186597033	186595689-186595826;186597034-186597271	186596842-186597033
839	SMOX	ENSG00000088826.18	ENSG00000088826.18:s:4182089-4182323	-0.0008;0.0008	1.987e-04;1.987e-04	7.952e-01;7.952e-01	0.0286;0.9714	0.0200;0.9800	s|1e1.1o1|i	2	2	0;0	chr20	+	4182323-4182483;4182324-4182482	4182089-4182323;4182483-4182848	4182324-4182482
840	LZTS3	ENSG00000088899.16	ENSG00000088899.16:s:3165767-3166360	-0.0004;0.0004	1.638e-05;1.638e-05	9.011e-01;9.011e-01	0.0189;0.9811	0.0135;0.9865	s|1e1.1o1|i	2	2	0;0	chr20	-	3165628-3165767;3165629-3165766	3165497-3165628;3165767-3166360	3165629-3165766
841	TINF2	ENSG00000092330.18	ENSG00000092330.18:s:24240064-24240242	-0.0001;0.0001	1.550e-06;1.550e-06	9.444e-01;9.444e-01	0.0130;0.9870	0.0120;0.9880	s|1e1.1o1|i	2	2	0;0	chr14	-	24239931-24240064;24239932-24240063	24239643-24239931;24240064-24240242	24239932-24240063
842	TINF2	ENSG00000092330.18	ENSG00000092330.18:s:24240419-24240474	-0.0003;0.0003	2.456e-06;2.456e-06	9.487e-01;9.487e-01	0.0132;0.9868	0.0102;0.9898	s|1e1.1o1|i	2	2	0;0	chr14	-	24240330-24240419;24240331-24240418	24240263-24240330;24240419-24240474	24240331-24240418
843	TINF2	ENSG00000092330.18	ENSG00000092330.18:s:24242377-24242674	0.0002;-0.0002	5.814e-05;5.814e-05	8.487e-01;8.487e-01	0.0192;0.9808	0.0217;0.9783	s|1e1.1o2|i	2	2	0;0	chr14	-	24241994-24242377;24242343-24242376	24241890-24242077;24242377-24242674	24242343-24242376
844	NEFM	ENSG00000104722.14	ENSG00000104722.14:s:24913758-24913804	-0.0002;0.0002	1.212e-07;1.212e-07	9.817e-01;9.817e-01	0.0102;0.9898	0.0049;0.9951	s|1e1.1o1|i	2	2	0;0	chr8	+	24913804-24914427;24913805-24914426	24913758-24913804;24914427-24914873	24913805-24914426
845	NEFM	ENSG00000104722.14	ENSG00000104722.14:s:24917061-24917731	-0.0001;-0.0001;-0.0001;0.0005	4.014e-08;4.014e-08;4.014e-08;4.148e-07	9.928e-01;9.928e-01;9.928e-01;9.616e-01	0.0053;0.0053;0.0053;0.9840	0.0023;0.0023;0.0023;0.9930	s|1e1.3o3|2e1.2o3|3e1.1o3|i	4	2	0;0;0;0	chr8	+	24917412-24918318;24917616-24918271;24917731-24917849;24917732-24917848	24917061-24917731;24917849-24919098	24917732-24917848
846	NPDC1	ENSG00000107281.10	ENSG00000107281.10:s:137041062-137041187	0.0001;-0.0001	3.988e-04;3.988e-04	7.234e-01;7.234e-01	0.0294;0.9706	0.0333;0.9667	s|1e1.1o1|i	2	2	0;0	chr9	-	137040984-137041062;137040985-137041061	137040813-137040984;137041062-137041187	137040985-137041061
847	DELE1	ENSG00000081791.9	ENSG00000081791.9:s:141938521-141938760	0.0001;0.0001;-0.0001	5.323e-05;5.323e-05;2.143e-04	8.741e-01;8.741e-01;7.260e-01	0.0167;0.0167;0.9667	0.0185;0.0185;0.9630	s|1e1.1o1|1e2.2o2|i	3	3	0;0;0	chr5	+	141938760-141938856;141938760-141939554;141938761-141938855	141938521-141938760;141938856-141938948;141939506-141942047	141938761-141938855
848	DELE1	ENSG00000081791.9	ENSG00000081791.9:t:141939506-141942047	-0.0002;-0.0002;0.0004	1.389e-04;1.389e-04;5.524e-04	8.400e-01;8.400e-01;6.673e-01	0.0185;0.0185;0.9630	0.0185;0.0185;0.9630	t|1e2.1o1|2e1.1o1|i	3	3	0;0;0	chr5	+	141938904-141939506;141938760-141939554;141938949-141939505	141938521-141938760;141938856-141938948;141939506-141942047	141938949-141939505
849	ZNF446	ENSG00000083838.17	ENSG00000083838.17:s:58480176-58480619	-0.0009;0.0009	2.659e-04;2.659e-04	7.653e-01;7.653e-01	0.0333;0.9667	0.0204;0.9796	s|1e1.1o1|i	2	2	0;0	chr19	+	58480619-58480704;58480620-58480703	58480176-58480619;58480704-58481230	58480620-58480703
850	SEH1L	ENSG00000085415.16	ENSG00000085415.16:t:12986862-12987536	-0.0002;0.0002	2.055e-05;2.055e-05	8.842e-01;8.842e-01	0.0189;0.9811	0.0167;0.9833	t|1e1.1o1|i	2	2	0;0	chr18	+	12984190-12986862;12985719-12986861	12984040-12984190;12986862-12987536	12985719-12986861
851	MMP2	ENSG00000087245.13	ENSG00000087245.13:s:55505339-55505759	-0.0009;0.0009	9.734e-04;9.734e-04	6.496e-01;6.496e-01	0.0477;0.9523	0.0323;0.9677	s|1e1.1o1|i	2	2	0;0	chr16	+	55505579-55506002;55505760-55506001	55505339-55505759;55506002-55506691	55505760-55506001
852	PPP1R13B	ENSG00000088808.18	ENSG00000088808.18:s:103734892-103735079	-0.0006;0.0006	8.573e-04;8.573e-04	6.566e-01;6.566e-01	0.0436;0.9564	0.0357;0.9643	s|1e1.1o1|i	2	2	0;0	chr14	-	103734663-103735000;103734664-103734891	103734367-103734663;103734892-103735079	103734664-103734891
853	RPL6	ENSG00000089009.16	ENSG00000089009.16:s:112409411-112409574	-0.0002;-0.0002;0.0004	2.896e-04;2.896e-04;1.145e-03	7.927e-01;7.927e-01;5.939e-01	0.0247;0.0247;0.9505	0.0215;0.0215;0.9569	s|1e1.1o1|2e1.1o1|i	3	2	0;0;0	chr12	-	112408656-112409493;112408656-112409411;112409312-112409410	112408420-112408952;112409411-112409574	112409312-112409410
854	RPLP0	ENSG00000089157.16	ENSG00000089157.16:t:120198358-120198631	-0.0000;0.0000	2.247e-21;2.043e-21	1.000e+00;1.000e+00	0.0021;0.9979	0.0010;0.9990	t|1e1.2o2|i	2	2	0;0	chr12	-	120198631-120198854;120198632-120198703	120198358-120198631;120198854-120199000	120198632-120198703
855	RPLP0	ENSG00000089157.16	ENSG00000089157.16:t:120199310-120199425	-0.0000;0.0000	2.247e-21;2.043e-21	1.000e+00;1.000e+00	0.0024;0.9976	0.0014;0.9986	t|1e1.1o2|i	2	2	0;0	chr12	-	120199425-120200730;120199426-120199456	120199310-120199425;120200719-120200891	120199426-120199456
856	MYO9B	ENSG00000099331.14	ENSG00000099331.14:s:17211647-17211786	-0.0002;-0.0002;-0.0002;0.0008	1.487e-05;1.487e-05;1.487e-05;1.292e-04	9.375e-01;9.375e-01;9.375e-01;7.634e-01	0.0109;0.0109;0.0109;0.9674	0.0086;0.0086;0.0086;0.9741	s|1e1.1o1|1e2.1o1|2e1.1o1|i	4	3	0;0;0;0	chr19	+	17211774-17211895;17211774-17214460;17211786-17211895;17211787-17211894	17211647-17211786;17211895-17213295;17214460-17214537	17211787-17211894
857	MED15	ENSG00000099917.17	ENSG00000099917.17:s:20554239-20554995	-0.0001;0.0001	5.485e-06;5.485e-06	9.180e-01;9.180e-01	0.0156;0.9844	0.0149;0.9851	s|1e1.1o1|i	2	2	0;0	chr22	+	20554995-20555077;20554996-20555076	20554239-20554995;20555077-20555148	20554996-20555076
858	SUPT20H	ENSG00000102710.21	ENSG00000102710.21:t:37022011-37022080	-0.0002;0.0002	6.659e-06;6.659e-06	9.198e-01;9.198e-01	0.0164;0.9836	0.0132;0.9868	t|1e1.1o1|i	2	2	0;0	chr13	-	37022080-37024035;37022081-37022222	37022011-37022080;37023549-37024193	37022081-37022222
859	DMPK	ENSG00000104936.20	ENSG00000104936.20:t:45777667-45777723	-0.0004;0.0004	7.891e-06;7.891e-06	9.281e-01;9.281e-01	0.0156;0.9844	0.0115;0.9885	t|1e1.1o1|i	2	2	0;0	chr19	-	45777723-45778127;45777724-45777769	45777667-45777723;45778127-45778220	45777724-45777769
860	DMPK	ENSG00000104936.20	ENSG00000104936.20:t:45779778-45779869	0.0001;0.0001;-0.0004	4.916e-04;4.916e-04;1.946e-03	7.514e-01;7.514e-01;5.347e-01	0.0238;0.0238;0.9524	0.0290;0.0290;0.9419	t|1e1.1o1|1e2.1o1|i	3	3	0;0;0	chr19	-	45779869-45782193;45779869-45780323;45779870-45780322	45779778-45779869;45780323-45780747;45782193-45782552	45779870-45780322
861	CPSF6	ENSG00000111605.18	ENSG00000111605.18:s:69251129-69251141	0.0000;-0.0000	7.062e-09;7.121e-09	9.897e-01;9.897e-01	0.0067;0.9933	0.0077;0.9923	s|1e1.2o2|i	2	2	0;0	chr12	+	69251141-69262469;69251142-69251174	69251129-69251141;69262373-69262562	69251142-69251174
862	ICMT	ENSG00000116237.16	ENSG00000116237.16:s:6223438-6223502	-0.0010;0.0010	3.446e-04;3.446e-04	7.513e-01;7.513e-01	0.0357;0.9643	0.0217;0.9783	s|1e1.1o1|i	2	2	0;0	chr1	-	6222160-6223438;6222161-6223437	6221193-6222160;6223438-6223502	6222161-6223437
863	SENP5	ENSG00000119231.11	ENSG00000119231.11:s:196930813-196931111	-0.0001;0.0001	4.855e-06;4.855e-06	9.227e-01;9.227e-01	0.0149;0.9851	0.0141;0.9859	s|1e1.1o1|i	2	2	0;0	chr3	+	196930900-196931914;196931112-196931913	196930813-196931111;196931914-196934714	196931112-196931913
864	MAP1S	ENSG00000130479.11	ENSG00000130479.11:s:17727289-17728111	-0.0001;0.0001	4.197e-09;4.214e-09	9.904e-01;9.904e-01	0.0081;0.9919	0.0064;0.9936	s|1e1.2o2|i	2	2	0;0	chr19	+	17727496-17733281;17728112-17728112	17727289-17728111;17733020-17733428	17728112-17728112
865	MAP1S	ENSG00000130479.11	ENSG00000130479.11:t:17727289-17728111	-0.0002;0.0002	4.590e-07;4.590e-07	9.682e-01;9.682e-01	0.0116;0.9884	0.0079;0.9921	t|1e1.1o1|i	2	2	0;0	chr19	+	17719620-17727289;17726544-17727288	17719480-17719620;17727289-17728111	17726544-17727288
866	MAP1S	ENSG00000130479.11	ENSG00000130479.11:t:17728113-17728172	-0.0001;0.0001	4.197e-09;4.214e-09	9.904e-01;9.904e-01	0.0081;0.9919	0.0064;0.9936	t|1e1.1o2|i	2	2	0;0	chr19	+	17725096-17728113;17728112-17728112	17725030-17725189;17728113-17728172	17728112-17728112
867	FADS2	ENSG00000134824.14	ENSG00000134824.14:s:61816256-61816426	-0.0003;-0.0003;0.0008	5.462e-04;5.462e-04;2.183e-03	7.500e-01;7.500e-01;5.298e-01	0.0278;0.0278;0.9444	0.0256;0.0256;0.9487	s|1e1.1o1|1e2.1o1|i	3	3	0;0;0	chr11	+	61816426-61826032;61816426-61837778;61816427-61816545	61816256-61816426;61826032-61826137;61837778-61837888	61816427-61816545
868	XRCC5	ENSG00000079246.16	ENSG00000079246.16:t:216117741-216117794	0.0002;0.0002;-0.0006	2.590e-04;2.590e-04;1.032e-03	8.013e-01;8.013e-01;6.060e-01	0.0185;0.0185;0.9630	0.0267;0.0267;0.9466	t|1e1.1o1|2e1.1o1|i	3	2	0;0;0	chr2	+	216116842-216117741;216116842-216117746;216117039-216117740	216116638-216116842;216117741-216117794	216117039-216117740
869	FDFT1	ENSG00000079459.13	ENSG00000079459.13:s:11803012-11803225	-0.0002;-0.0002;-0.0002;0.0008	9.593e-06;9.593e-06;9.593e-06;8.406e-05	9.496e-01;9.496e-01;9.496e-01;7.991e-01	0.0100;0.0100;0.0100;0.9700	0.0075;0.0075;0.0075;0.9774	s|1e1.1o2|1e1.2o2|1e2.1o1|i	4	3	0;0;0;0	chr8	+	11803225-11803305;11803225-11803322;11803225-11808794;11803226-11803304	11803012-11803225;11803305-11803832;11808417-11808891	11803226-11803304
870	FDFT1	ENSG00000079459.13	ENSG00000079459.13:t:11803305-11803832	-0.0002;-0.0002;-0.0002;0.0008	9.593e-06;9.593e-06;9.593e-06;8.406e-05	9.496e-01;9.496e-01;9.496e-01;7.991e-01	0.0100;0.0100;0.0100;0.9700	0.0075;0.0075;0.0075;0.9774	t|1e2.1o1|2e1.2o2|2e2.1o1|i	4	3	0;0;0;0	chr8	+	11803225-11803305;11802931-11803322;11803225-11803322;11803226-11803304	11802611-11802931;11803012-11803225;11803305-11803832	11803226-11803304
871	ADNP2	ENSG00000101544.9	ENSG00000101544.9:s:80117530-80117584	-0.0002;0.0002	3.019e-06;3.019e-06	9.425e-01;9.425e-01	0.0147;0.9853	0.0108;0.9892	s|1e1.1o1|i	2	2	0;0	chr18	+	80117584-80133103;80117585-80117607	80117530-80117584;80133103-80133192	80117585-80117607
872	PSMD10	ENSG00000101843.19	ENSG00000101843.19:s:108088096-108088099	-0.0005;0.0005	2.086e-05;2.086e-05	8.910e-01;8.910e-01	0.0200;0.9800	0.0130;0.9870	s|1e1.1o1|i	2	2	0;0	chrX	-	108087972-108088096;108087973-108088095	108087953-108087972;108088096-108088099	108087973-108088095
873	XIAP	ENSG00000101966.13	ENSG00000101966.13:s:123912760-123913016	-0.0007;0.0007	9.469e-05;9.469e-05	8.241e-01;8.241e-01	0.0278;0.9722	0.0181;0.9819	s|1e1.1o1|i	2	2	0;0	chrX	+	123913016-123913245;123913017-123913244	123912760-123913016;123913245-123913976	123913017-123913244
874	MAGED2	ENSG00000102316.17	ENSG00000102316.17:s:54810821-54810904	-0.0000;0.0000	2.249e-21;6.074e-13	9.994e-01;9.994e-01	0.0044;0.9956	0.0033;0.9967	s|1e1.1o1|i	2	2	0;0	chrX	+	54810904-54811046;54810905-54811045	54810821-54810904;54811046-54811130	54810905-54811045
875	MAGED2	ENSG00000102316.17	ENSG00000102316.17:s:54815248-54815694	-0.0003;0.0003	1.459e-06;1.459e-06	9.488e-01;9.488e-01	0.0139;0.9861	0.0103;0.9897	s|1e1.1o1|i	2	2	0;0	chrX	+	54815690-54815881;54815695-54815880	54815248-54815694;54815881-54816015	54815695-54815880
876	MAGED2	ENSG00000102316.17	ENSG00000102316.17:t:54809872-54810213	-0.0000;-0.0000;-0.0000;0.0002	1.667e-08;1.667e-08;1.667e-08;1.725e-07	9.960e-01;9.960e-01;9.960e-01;9.771e-01	0.0041;0.0041;0.0041;0.9877	0.0024;0.0024;0.0024;0.9927	t|1e2.2o2|2e2.1o2|3e1.1o1|i	4	3	0;0;0;0	chrX	+	54809817-54809872;54809808-54809923;54809376-54810118;54809818-54809871	54809303-54809376;54809722-54809817;54809872-54810213	54809818-54809871
877	RPS16	ENSG00000105193.9	ENSG00000105193.9:s:39435607-39435708	-0.0000;-0.0000;-0.0000	4.888e-04;4.888e-04;1.914e-03	7.483e-01;7.483e-01;5.322e-01	0.0267;0.0267;0.9466	0.0278;0.0278;0.9444	s|1e1.1o1|2e1.1o1|i	3	2	0;0;0	chr19	-	39433761-39435658;39433761-39435607;39434391-39435606	39433665-39434390;39435607-39435708	39434391-39435606
878	CACTIN	ENSG00000105298.14	ENSG00000105298.14:s:3611568-3612413	-0.0000;-0.0000;-0.0000;-0.0000;0.0002	1.336e-05;1.336e-05;1.336e-05;1.336e-05;1.908e-04	9.428e-01;9.428e-01;9.428e-01;9.428e-01;7.134e-01	0.0091;0.0091;0.0091;0.0091;0.9636	0.0091;0.0091;0.0091;0.0091;0.9636	s|1e1.1o2|1e2.1o2|2e1.2o2|2e2.2o2|i	5	3	0;0;0;0;0	chr19	-	3611364-3611904;3610971-3611904;3611360-3611900;3610966-3611900;3611365-3611567	3610645-3610971;3611229-3611364;3611568-3612413	3611365-3611567
879	CACTIN	ENSG00000105298.14	ENSG00000105298.14:t:3610645-3610971	-0.0001;-0.0001;-0.0001;0.0003	2.138e-05;2.138e-05;2.138e-05;1.849e-04	9.219e-01;9.219e-01;9.219e-01;7.222e-01	0.0116;0.0116;0.0116;0.9651	0.0104;0.0104;0.0104;0.9688	t|1e1.1o2|1e2.1o1|2e1.2o2|i	4	3	0;0;0;0	chr19	-	3610971-3611904;3610971-3611229;3610966-3611900;3610972-3611228	3610645-3610971;3611229-3611364;3611568-3612413	3610972-3611228
880	KIF21B	ENSG00000116852.15	ENSG00000116852.15:t:200969390-200973578	-0.0001;0.0001	8.397e-07;8.397e-07	9.517e-01;9.517e-01	0.0122;0.9878	0.0121;0.9879	t|1e1.1o1|i	2	2	0;0	chr1	-	200973578-200974714;200973579-200973806	200969390-200973578;200974714-200974913	200973579-200973806
881	TUBGCP6	ENSG00000128159.12	ENSG00000128159.12:s:50221275-50221874	-0.0001;0.0001	2.567e-05;2.567e-05	8.735e-01;8.735e-01	0.0189;0.9811	0.0179;0.9821	s|1e1.1o1|i	2	2	0;0	chr22	-	50220015-50221275;50220417-50221274	50219957-50220015;50221275-50221874	50220417-50221274
882	PSMA1	ENSG00000129084.18	ENSG00000129084.18:s:14520193-14520211	-0.0005;0.0005	2.410e-04;2.410e-04	7.589e-01;7.589e-01	0.0312;0.9688	0.0257;0.9743	s|1e1.1o1|i	2	2	0;0	chr11	-	14519041-14520193;14520073-14520192	14518997-14519041;14520193-14520211	14520073-14520192
883	PSMA1	ENSG00000129084.18	ENSG00000129084.18:s:14520297-14520445	-0.0005;-0.0005;0.0012	4.372e-04;4.372e-04;1.746e-03	7.680e-01;7.680e-01;5.554e-01	0.0290;0.0290;0.9419	0.0222;0.0222;0.9556	s|1e1.1o1|1e2.1o1|i	3	3	0;0;0	chr11	-	14520211-14520297;14519041-14520297;14520212-14520296	14518997-14519041;14520193-14520211;14520297-14520445	14520212-14520296
884	RFTN1	ENSG00000131378.14	ENSG00000131378.14:s:16316530-16317232	0.0003;-0.0003	1.675e-04;1.675e-04	7.890e-01;7.890e-01	0.0233;0.9767	0.0286;0.9714	s|1e1.1o1|i	2	2	0;0	chr3	-	16315886-16317175;16315887-16316529	16315625-16315886;16316530-16317232	16315887-16316529
885	ANKRD36	ENSG00000135976.21	ENSG00000135976.21:s:97249144-97249214	0.0002;-0.0002	5.650e-04;5.650e-04	6.949e-01;6.949e-01	0.0312;0.9688	0.0357;0.9643	s|1e1.1o1|i	2	2	0;0	chr2	+	97249214-97249552;97249215-97249551	97249144-97249214;97249552-97249645	97249215-97249551
886	RDX	ENSG00000137710.17	ENSG00000137710.17:t:110263960-110264020	-0.0000;0.0000	8.487e-09;8.554e-09	9.859e-01;9.859e-01	0.0086;0.9914	0.0076;0.9924	t|1e1.1o2|i	2	2	0;0	chr11	-	110264020-110279713;110264021-110264044	110263960-110264020;110279681-110279756	110264021-110264044
887	HNRNPD	ENSG00000138668.19	ENSG00000138668.19:s:82355249-82355401	-0.0005;-0.0005;0.0012	7.833e-05;7.833e-05;3.139e-04	8.752e-01;8.752e-01;7.258e-01	0.0202;0.0202;0.9596	0.0123;0.0123;0.9753	s|1e1.1o1|1e2.1o1|i	3	3	0;0;0	chr4	-	82355001-82355304;82354154-82355304;82355002-82355248	82352498-82354154;82354847-82355001;82355249-82355401	82355002-82355248
888	RFFL	ENSG00000092871.17	ENSG00000092871.17:s:35007872-35008232	0.0000;-0.0000	1.543e-04;1.543e-04	8.021e-01;8.021e-01	0.0217;0.9783	0.0239;0.9761	s|1e1.1o1|i	2	2	0;0	chr17	-	35007454-35007872;35007455-35007871	35005990-35007454;35007872-35008232	35007455-35007871
889	SH2D3C	ENSG00000095370.20	ENSG00000095370.20:t:127744564-127744815	-0.0004;0.0004	8.281e-06;8.281e-06	9.183e-01;9.183e-01	0.0175;0.9825	0.0118;0.9882	t|1e1.1o1|i	2	2	0;0	chr9	-	127744815-127774347;127744816-127744897	127744564-127744815;127774347-127774467	127744816-127744897
890	EEF1D	ENSG00000104529.19	ENSG00000104529.19:t:143580389-143580637	-0.0000;-0.0000;0.0001	6.953e-11;6.953e-11;5.622e-10	9.978e-01;9.978e-01;9.928e-01	0.0044;0.0044;0.9912	0.0032;0.0032;0.9936	t|1e2.1o1|2e1.2o3|i	3	3	0;0;0	chr8	-	143580632-143581054;143580610-143586743;143580638-143580662	143580389-143580637;143581054-143581154;143586729-143587564	143580638-143580662
891	SNRNP70	ENSG00000104852.15	ENSG00000104852.15:s:49102114-49102185	0.0000;0.0000;-0.0001	1.130e-06;1.130e-06;4.890e-06	9.625e-01;9.625e-01;9.011e-01	0.0088;0.0088;0.9825	0.0094;0.0094;0.9812	s|1e1.1o1|2e1.1o1|i	3	2	0;0;0	chr19	+	49102173-49104634;49102185-49104634;49102186-49102410	49102114-49102185;49104634-49104735	49102186-49102410
892	SNRNP70	ENSG00000104852.15	ENSG00000104852.15:t:49104634-49104735	-0.0001;-0.0001;-0.0001;-0.0001;0.0004	1.965e-06;1.965e-06;1.965e-06;1.965e-06;3.016e-05	9.692e-01;9.692e-01;9.692e-01;9.692e-01;8.169e-01	0.0071;0.0071;0.0071;0.0071;0.9714	0.0063;0.0063;0.0063;0.0063;0.9750	t|1e1.1o1|1e2.1o2|1e2.2o2|1e3.1o1|i	5	4	0;0;0;0;0	chr19	+	49101471-49104634;49102173-49104634;49102185-49104634;49103587-49104634;49103588-49104633	49101390-49101668;49102114-49102185;49102411-49103587;49104634-49104735	49103588-49104633
893	EDF1	ENSG00000107223.13	ENSG00000107223.13:s:136862906-136862999	0.0001;0.0001;-0.0002	6.615e-05;6.615e-05;2.653e-04	8.715e-01;8.715e-01;7.208e-01	0.0152;0.0152;0.9697	0.0175;0.0175;0.9649	s|1e1.1o1|1e2.1o1|i	3	3	0;0;0	chr9	-	136862496-136862906;136862345-136862906;136862497-136862905	136862119-136862345;136862490-136862496;136862906-136862999	136862497-136862905
894	EDF1	ENSG00000107223.13	ENSG00000107223.13:t:136862119-136862345	0.0000;-0.0000	6.918e-06;6.918e-06	9.179e-01;9.179e-01	0.0141;0.9859	0.0152;0.9848	t|1e1.1o1|i	2	2	0;0	chr9	-	136862345-136862906;136862346-136862489	136862119-136862345;136862906-136862999	136862346-136862489
895	ARHGAP21	ENSG00000107863.20	ENSG00000107863.20:s:24596740-24596882	0.0004;-0.0004	3.792e-04;3.792e-04	7.353e-01;7.353e-01	0.0263;0.9737	0.0333;0.9667	s|1e1.1o1|i	2	2	0;0	chr10	-	24596043-24596740;24596044-24596739	24595888-24596043;24596740-24596882	24596044-24596739
896	ARHGAP21	ENSG00000107863.20	ENSG00000107863.20:s:24629996-24630050	0.0000;0.0000;0.0000;-0.0002	9.938e-06;9.938e-06;9.938e-06;8.783e-05	9.401e-01;9.401e-01;9.401e-01;7.719e-01	0.0096;0.0096;0.0096;0.9712	0.0106;0.0106;0.0106;0.9681	s|1e1.1o1|1e2.1o1|1e3.1o1|i	4	4	0;0;0;0	chr10	-	24629862-24629996;24622762-24629996;24621369-24629996;24629863-24629995	24619473-24621369;24622733-24622842;24629014-24629862;24629996-24630050	24629863-24629995
897	TRIM2	ENSG00000109654.16	ENSG00000109654.16:s:153322648-153322828	0.0000;0.0000;0.0000;0.0000;0.0000;-0.0002	2.167e-04;2.167e-04;2.167e-04;2.167e-04;2.167e-04;4.119e-03	8.619e-01;8.619e-01;8.619e-01;8.619e-01;8.619e-01;4.208e-01	0.0145;0.0145;0.0145;0.0145;0.0145;0.9274	0.0167;0.0167;0.0167;0.0167;0.0167;0.9167	s|1e1.1o1|2e1.1o1|2e2.1o1|3e1.1o1|3e2.1o1|i	6	3	0;0;0;0;0;0	chr4	+	153322778-153324078;153322816-153324078;153322816-153328530;153322828-153324078;153322828-153328530;153322829-153324077	153322648-153322828;153324078-153324490;153328530-153329669	153322829-153324077
898	NKTR	ENSG00000114857.19	ENSG00000114857.19:s:42619020-42619127	0.0005;-0.0005	3.780e-04;3.780e-04	7.355e-01;7.355e-01	0.0250;0.9750	0.0385;0.9615	s|1e1.1o1|i	2	2	0;0	chr3	+	42619127-42619664;42619128-42619663	42619020-42619127;42619664-42619708	42619128-42619663
899	NKTR	ENSG00000114857.19	ENSG00000114857.19:t:42621005-42621516	0.0001;0.0001;-0.0003	7.830e-05;7.830e-05;3.134e-04	8.605e-01;8.605e-01;7.024e-01	0.0167;0.0167;0.9667	0.0196;0.0196;0.9608	t|1e1.1o1|1e2.1o1|i	3	3	0;0;0	chr3	+	42619708-42621429;42620043-42621429;42620317-42621004	42619664-42619708;42619819-42620316;42621005-42621516	42620317-42621004
900	SRSF11	ENSG00000116754.14	ENSG00000116754.14:s:70231095-70231274	0.0002;0.0002;0.0002;-0.0010	2.590e-05;2.590e-05;2.590e-05;2.232e-04	9.296e-01;9.296e-01;9.296e-01;7.395e-01	0.0081;0.0081;0.0081;0.9758	0.0135;0.0135;0.0135;0.9594	s|1e1.1o1|1e2.1o1|2e1.1o1|i	4	3	0;0;0;0	chr1	+	70231203-70231859;70231203-70232268;70231257-70231859;70231275-70231547	70231095-70231274;70231548-70231975;70232268-70232377	70231275-70231547
901	SRSF11	ENSG00000116754.14	ENSG00000116754.14:t:70231095-70231274	0.0001;0.0001;-0.0004	3.252e-05;3.252e-05;1.321e-04	8.977e-01;8.977e-01;7.680e-01	0.0128;0.0128;0.9744	0.0167;0.0167;0.9667	t|1e1.1o1|1e2.1o1|i	3	3	0;0;0	chr1	+	70228555-70231095;70230618-70231095;70230619-70231094	70228422-70228727;70230064-70230618;70231095-70231274	70230619-70231094
902	SRSF11	ENSG00000116754.14	ENSG00000116754.14:t:70231548-70231975	0.0002;0.0002;0.0002;-0.0010	2.590e-05;2.590e-05;2.590e-05;2.232e-04	9.296e-01;9.296e-01;9.296e-01;7.395e-01	0.0081;0.0081;0.0081;0.9758	0.0135;0.0135;0.0135;0.9594	t|1e1.1o1|1e2.1o2|1e2.2o2|i	4	3	0;0;0;0	chr1	+	70228555-70231859;70231203-70231859;70231257-70231859;70231275-70231547	70228422-70228727;70231095-70231274;70231548-70231975	70231275-70231547
903	SRSF11	ENSG00000116754.14	ENSG00000116754.14:t:70232268-70232377	0.0001;0.0001;0.0001;-0.0004	1.449e-05;1.449e-05;1.449e-05;1.266e-04	9.356e-01;9.356e-01;9.356e-01;7.583e-01	0.0091;0.0091;0.0091;0.9727	0.0114;0.0114;0.0114;0.9659	t|1e1.1o1|1e2.1o2|1e3.1o1|i	4	4	0;0;0;0	chr1	+	70228555-70232268;70231203-70232268;70231975-70232268;70231976-70232267	70228422-70228727;70231095-70231274;70231548-70231975;70232268-70232377	70231976-70232267
904	ARMCX5	ENSG00000125962.16	ENSG00000125962.16:s:102599348-102599572	-0.0004;0.0004	9.755e-06;9.755e-06	9.139e-01;9.139e-01	0.0182;0.9818	0.0122;0.9878	s|1e1.1o1|i	2	2	0;0	chrX	+	102599572-102599712;102599573-102599711	102599348-102599572;102599712-102599859	102599573-102599711
905	CANX	ENSG00000127022.16	ENSG00000127022.16:s:179699009-179699049	-0.0001;-0.0001;0.0002	2.016e-08;2.016e-08;9.438e-08	9.906e-01;9.906e-01;9.716e-01	0.0063;0.0063;0.9873	0.0047;0.0047;0.9905	s|1e1.1o2|1e2.1o1|i	3	3	0;0;0	chr5	+	179699049-179704155;179699049-179705679;179699050-179699053	179699009-179699049;179704155-179704430;179705679-179705862	179699050-179699053
906	TBC1D17	ENSG00000104946.14	ENSG00000104946.14:s:49878498-49878572	-0.0003;-0.0003;0.0008	8.146e-04;8.146e-04;3.297e-03	7.167e-01;7.167e-01;4.813e-01	0.0278;0.0278;0.9444	0.0267;0.0267;0.9466	s|1e1.1o1|1e2.1o1|i	3	3	0;0;0	chr19	+	49878572-49879323;49878572-49880279;49878573-49879322	49878498-49878572;49879323-49879504;49880279-49880402	49878573-49879322
907	PMPCB	ENSG00000105819.14	ENSG00000105819.14:s:103312056-103312131	-0.0004;-0.0004;0.0009	4.019e-05;4.019e-05;1.621e-04	8.984e-01;8.984e-01;7.685e-01	0.0171;0.0171;0.9658	0.0123;0.0123;0.9753	s|1e1.1o1|1e2.1o1|i	3	3	0;0;0	chr7	+	103312131-103312207;103312131-103328931;103312132-103312206	103312056-103312131;103312207-103314686;103328931-103329511	103312132-103312206
908	PMPCB	ENSG00000105819.14	ENSG00000105819.14:t:103312207-103314686	-0.0004;-0.0004;0.0009	4.019e-05;4.019e-05;1.621e-04	8.984e-01;8.984e-01;7.685e-01	0.0171;0.0171;0.9658	0.0123;0.0123;0.9753	t|1e1.1o1|1e2.1o1|i	3	3	0;0;0	chr7	+	103310475-103312207;103312131-103312207;103312132-103312206	103310315-103310475;103312056-103312131;103312207-103314686	103312132-103312206
909	YKT6	ENSG00000106636.9	ENSG00000106636.9:s:44212247-44213174	-0.0001;0.0001	3.822e-08;3.825e-08	9.855e-01;9.855e-01	0.0089;0.9911	0.0061;0.9939	s|1e1.1o1|i	2	2	0;0	chr7	+	44213174-44213255;44213175-44213254	44212247-44213174;44213255-44214294	44213175-44213254
910	WLS	ENSG00000116729.14	ENSG00000116729.14:s:68232373-68232545	-0.0002;0.0002	4.984e-05;4.984e-05	8.466e-01;8.466e-01	0.0227;0.9773	0.0192;0.9808	s|1e1.3o3|i	2	2	0;0	chr1	-	68193988-68232373;68232281-68232372	68193858-68194227;68232373-68232545	68232281-68232372
911	ZSCAN18	ENSG00000121413.13	ENSG00000121413.13:s:58086174-58086266	-0.0003;-0.0003;0.0006	4.863e-04;4.863e-04;1.946e-03	7.594e-01;7.594e-01;5.429e-01	0.0278;0.0278;0.9444	0.0230;0.0230;0.9540	s|1e1.1o2|1e1.2o2|i	3	2	0;0;0	chr19	-	58085379-58086174;58085376-58086174;58085380-58086173	58083838-58085379;58086174-58086266	58085380-58086173
912	ZSCAN18	ENSG00000121413.13	ENSG00000121413.13:s:58088685-58088837	0.0000;-0.0000	2.087e-04;2.087e-04	7.711e-01;7.711e-01	0.0263;0.9737	0.0278;0.9722	s|1e1.1o1|i	2	2	0;0	chr19	-	58087404-58088688;58088028-58088684	58087093-58087453;58088685-58088837	58088028-58088684
913	ZSCAN18	ENSG00000121413.13	ENSG00000121413.13:t:58086174-58086266	-0.0002;-0.0002;0.0006	1.092e-04;1.092e-04;4.353e-04	8.477e-01;8.477e-01;6.806e-01	0.0191;0.0191;0.9619	0.0175;0.0175;0.9649	t|1e1.1o1|1e2.1o1|i	3	3	0;0;0	chr19	-	58086266-58087316;58086266-58086906;58086267-58086579	58086174-58086266;58086580-58087008;58087093-58087453	58086267-58086579
914	ZSCAN18	ENSG00000121413.13	ENSG00000121413.13:t:58087093-58087453	0.0005;-0.0005	1.937e-04;1.937e-04	7.966e-01;7.966e-01	0.0208;0.9792	0.0294;0.9706	t|1e1.1o1|i	2	2	0;0	chr19	-	58087404-58088688;58087454-58087636	58087093-58087453;58088685-58088837	58087454-58087636
915	PSMF1	ENSG00000125818.18	ENSG00000125818.18:t:1166227-1172246	-0.0003;0.0003	1.561e-06;1.561e-06	9.497e-01;9.497e-01	0.0133;0.9867	0.0103;0.9897	t|1e1.1o1|i	2	2	0;0	chr20	+	1164476-1166227;1165060-1166226	1164318-1164476;1166227-1172246	1165060-1166226
916	AKAP9	ENSG00000127914.19	ENSG00000127914.19:s:92083170-92083280	-0.0001;0.0001	3.354e-07;3.354e-07	9.684e-01;9.684e-01	0.0111;0.9889	0.0086;0.9914	s|1e1.1o1|i	2	2	0;0	chr7	+	92083280-92083437;92083281-92083436	92083170-92083280;92083437-92083655	92083281-92083436
917	AKAP9	ENSG00000127914.19	ENSG00000127914.19:t:92110122-92110673	-0.0000;-0.0000;0.0000	4.853e-04;4.853e-04;1.911e-03	7.539e-01;7.539e-01;5.383e-01	0.0238;0.0238;0.9524	0.0278;0.0278;0.9444	t|1e1.1o1|1e2.1o1|i	3	3	0;0;0	chr7	+	92102826-92110122;92108633-92110122;92109062-92110121	92102594-92102826;92108494-92109061;92110122-92110673	92109062-92110121
918	PLPPR3	ENSG00000129951.19	ENSG00000129951.19:s:814692-814749	-0.0005;-0.0005;0.0013	9.658e-05;9.658e-05;3.859e-04	8.590e-01;8.590e-01;6.985e-01	0.0222;0.0222;0.9556	0.0136;0.0136;0.9728	s|1e1.1o2|1e1.2o2|i	3	2	0;0;0	chr19	-	814607-814692;814571-814692;814608-814691	814434-814607;814692-814749	814608-814691
919	PLPPR3	ENSG00000129951.19	ENSG00000129951.19:s:821915-821955	-0.0010;0.0010	1.854e-04;1.854e-04	7.971e-01;7.971e-01	0.0333;0.9667	0.0173;0.9827	s|1e1.1o1|i	2	2	0;0	chr19	-	821585-821915;821586-821914	821485-821585;821915-821955	821586-821914
920	BUD13	ENSG00000137656.12	ENSG00000137656.12:s:116762955-116763266	0.0003;-0.0003	2.013e-04;2.013e-04	7.805e-01;7.805e-01	0.0217;0.9783	0.0294;0.9706	s|1e1.1o1|i	2	2	0;0	chr11	-	116760952-116762955;116762837-116762954	116760735-116760952;116762955-116763266	116762837-116762954
921	SMARCC2	ENSG00000139613.12	ENSG00000139613.12:s:56164648-56164731	0.0002;0.0002;-0.0005	2.400e-04;2.400e-04;9.504e-04	8.016e-01;8.016e-01;6.077e-01	0.0208;0.0208;0.9583	0.0278;0.0278;0.9444	s|1e1.1o1|1e2.1o1|i	3	3	0;0;0	chr12	-	56164368-56164648;56163765-56164648;56164369-56164647	56162359-56163765;56164303-56164368;56164648-56164731	56164369-56164647
922	MFGE8	ENSG00000140545.16	ENSG00000140545.16:s:88899298-88899532	-0.0007;0.0007	1.346e-04;1.346e-04	8.059e-01;8.059e-01	0.0303;0.9697	0.0196;0.9804	s|1e1.1o1|i	2	2	0;0	chr15	-	88899157-88899375;88899158-88899297	88898683-88899157;88899298-88899532	88899158-88899297
923	MFGE8	ENSG00000140545.16	ENSG00000140545.16:s:88906743-88906778	-0.0004;0.0004	1.825e-05;1.825e-05	9.115e-01;9.115e-01	0.0170;0.9830	0.0125;0.9875	s|1e1.1o1|i	2	2	0;0	chr15	-	88905578-88906743;88906717-88906742	88905382-88905578;88906743-88906778	88906717-88906742
924	GTF3C5	ENSG00000148308.18	ENSG00000148308.18:s:133030675-133030910	-0.0007;0.0007	7.208e-05;7.208e-05	8.514e-01;8.514e-01	0.0238;0.9762	0.0156;0.9844	s|1e1.1o1|i	2	2	0;0	chr9	+	133030910-133042087;133030911-133030996	133030675-133030910;133042087-133042306	133030911-133030996
925	ATP6V0D1	ENSG00000159720.13	ENSG00000159720.13:t:67438971-67439095	-0.0004;0.0004	1.375e-06;1.375e-06	9.541e-01;9.541e-01	0.0145;0.9855	0.0081;0.9919	t|1e1.1o1|i	2	2	0;0	chr16	-	67439095-67439274;67439096-67439107	67438971-67439095;67439274-67439818	67439096-67439107
926	ABR	ENSG00000159842.16	ENSG00000159842.16:s:1011937-1011985	-0.0004;0.0004	2.719e-06;2.719e-06	9.544e-01;9.544e-01	0.0139;0.9861	0.0075;0.9925	s|1e1.1o1|i	2	2	0;0	chr17	-	1005148-1011937;1011921-1011936	1003519-1005148;1011937-1011985	1011921-1011936
927	ZNF500	ENSG00000103199.14	ENSG00000103199.14:s:4751971-4752630	-0.0002;-0.0002;0.0005	1.144e-04;1.144e-04;4.549e-04	8.416e-01;8.416e-01;6.712e-01	0.0208;0.0208;0.9583	0.0185;0.0185;0.9630	s|1e1.1o1|1e2.1o1|i	3	3	0;0;0	chr16	-	4751658-4752522;4748410-4752522;4751659-4751970	4748239-4748410;4750792-4751658;4751971-4752630	4751659-4751970
928	SGTA	ENSG00000104969.11	ENSG00000104969.11:s:2755383-2755933	-0.0001;0.0001	4.668e-09;4.684e-09	9.924e-01;9.924e-01	0.0079;0.9921	0.0048;0.9952	s|1e1.1o1|i	2	2	0;0	chr19	-	2754854-2755383;2754855-2755382	2754715-2754854;2755383-2755933	2754855-2755382
929	FAM32A	ENSG00000105058.12	ENSG00000105058.12:s:16185380-16185516	-0.0008;0.0008	1.871e-04;1.871e-04	7.872e-01;7.872e-01	0.0323;0.9677	0.0192;0.9808	s|1e1.1o1|i	2	2	0;0	chr19	+	16185516-16185624;16185517-16185623	16185380-16185516;16185624-16185765	16185517-16185623
930	FBL	ENSG00000105202.9	ENSG00000105202.9:s:39840683-39840787	-0.0000;-0.0000;-0.0000;0.0002	2.107e-08;2.107e-08;2.107e-08;2.200e-07	9.920e-01;9.920e-01;9.920e-01;9.564e-01	0.0048;0.0048;0.0048;0.9856	0.0043;0.0043;0.0043;0.9871	s|1e1.1o1|1e2.2o3|2e2.2o3|i	4	3	0;0;0;0	chr19	-	39840682-39840722;39840509-39840722;39840509-39840683;39840683-39840682	39840414-39840515;39840617-39840682;39840683-39840787	39840683-39840682
931	NDUFC1	ENSG00000109390.13	ENSG00000109390.13:s:139302416-139302551	-0.0003;-0.0003;-0.0003;0.0013	1.974e-04;1.974e-04;1.974e-04;1.639e-03	8.462e-01;8.462e-01;8.462e-01;5.493e-01	0.0192;0.0192;0.0192;0.9423	0.0147;0.0147;0.0147;0.9559	s|1e1.1o1|1e2.1o1|1e3.1o1|i	4	4	0;0;0;0	chr4	-	139297443-139302416;139296367-139302416;139295960-139302416;139301421-139302415	139295732-139295960;139296332-139296367;139297385-139297443;139302416-139302551	139301421-139302415
932	CLCN3	ENSG00000109572.15	ENSG00000109572.15:s:169697189-169697279	-0.0001;0.0001	8.061e-09;8.132e-09	9.895e-01;9.895e-01	0.0088;0.9912	0.0050;0.9950	s|1e1.1o1|i	2	2	0;0	chr4	+	169697279-169697361;169697280-169697360	169697189-169697279;169697361-169697734	169697280-169697360
933	MTFR1L	ENSG00000117640.18	ENSG00000117640.18:t:25829618-25829658	-0.0001;0.0001	4.164e-05;4.164e-05	8.567e-01;8.567e-01	0.0204;0.9796	0.0196;0.9804	t|1e1.1o1|i	2	2	0;0	chr1	+	25826826-25829618;25829570-25829617	25826615-25826826;25829618-25829658	25829570-25829617
934	DOK4	ENSG00000125170.11	ENSG00000125170.11:s:57473613-57473736	-0.0005;0.0005	9.507e-05;9.507e-05	8.247e-01;8.247e-01	0.0264;0.9736	0.0179;0.9821	s|1e1.1o1|i	2	2	0;0	chr16	-	57473495-57473613;57473496-57473612	57471922-57473495;57473613-57473736	57473496-57473612
935	TMEM165	ENSG00000134851.13	ENSG00000134851.13:s:55417691-55417848	-0.0000;0.0000	5.250e-08;5.262e-08	9.793e-01;9.793e-01	0.0092;0.9908	0.0080;0.9920	s|1e1.1o1|i	2	2	0;0	chr4	+	55417848-55418048;55417849-55417918	55417691-55417848;55418048-55418164	55417849-55417918
936	RPS6	ENSG00000137154.13	ENSG00000137154.13:s:19379487-19379618	0.0001;-0.0001	1.202e-03;1.202e-03	6.244e-01;6.244e-01	0.0385;0.9615	0.0417;0.9583	s|1e1.1o1|i	2	2	0;0	chr9	-	19378918-19379487;19378919-19379486	19378708-19378918;19379487-19379618	19378919-19379486
937	RPS6	ENSG00000137154.13	ENSG00000137154.13:s:19380088-19380236	-0.0004;-0.0004;0.0009	1.116e-04;1.116e-04;4.451e-04	8.517e-01;8.517e-01;6.864e-01	0.0196;0.0196;0.9608	0.0152;0.0152;0.9697	s|1e1.1o1|2e1.1o1|i	3	2	0;0;0	chr9	-	19379618-19380190;19379618-19380088;19379619-19380087	19379487-19379618;19380088-19380236	19379619-19380087
938	CREBZF	ENSG00000137504.15	ENSG00000137504.15:s:85661953-85662457	-0.0000;-0.0000;0.0001	1.256e-05;1.256e-05;5.181e-05	9.205e-01;9.205e-01;8.120e-01	0.0128;0.0128;0.9744	0.0128;0.0128;0.9744	s|1e1.1o1|1e2.1o1|i	3	3	0;0;0	chr11	-	85661749-85662389;85660597-85662389;85661750-85661952	85657742-85660597;85661637-85661749;85661953-85662457	85661750-85661952
939	CREBZF	ENSG00000137504.15	ENSG00000137504.15:s:85663524-85663601	-0.0001;-0.0001;0.0002	3.272e-07;3.272e-07;1.452e-06	9.749e-01;9.749e-01;9.307e-01	0.0084;0.0084;0.9831	0.0071;0.0071;0.9858	s|1e1.1o1|1e2.1o1|i	3	3	0;0;0	chr11	-	85663293-85663524;85662457-85663524;85663294-85663523	85661953-85662457;85663179-85663293;85663524-85663601	85663294-85663523
940	CREBZF	ENSG00000137504.15	ENSG00000137504.15:t:85657742-85660597	-0.0001;-0.0001;0.0003	4.055e-06;4.055e-06;1.695e-05	9.503e-01;9.503e-01;8.737e-01	0.0101;0.0101;0.9798	0.0095;0.0095;0.9810	t|1e1.1o1|1e2.1o1|i	3	3	0;0;0	chr11	-	85660597-85662389;85660597-85661637;85660598-85661636	85657742-85660597;85661637-85661749;85661953-85662457	85660598-85661636
941	CREBZF	ENSG00000137504.15	ENSG00000137504.15:t:85661953-85662457	-0.0001;-0.0001;0.0002	2.123e-06;2.123e-06;9.095e-06	9.536e-01;9.536e-01;8.810e-01	0.0104;0.0104;0.9792	0.0095;0.0095;0.9810	t|1e1.1o1|1e2.1o1|i	3	3	0;0;0	chr11	-	85662457-85663524;85662457-85663179;85662458-85663178	85661953-85662457;85663179-85663293;85663524-85663601	85662458-85663178
942	CREBZF	ENSG00000137504.15	ENSG00000137504.15:t:85663524-85663601	-0.0001;-0.0001;-0.0001;-0.0001;0.0006	1.665e-07;1.665e-07;1.665e-07;1.665e-07;2.780e-06	9.881e-01;9.881e-01;9.881e-01;9.881e-01;9.133e-01	0.0053;0.0053;0.0053;0.0053;0.9787	0.0036;0.0036;0.0036;0.0036;0.9855	t|1e1.1o2|1e1.2o2|1e2.1o2|1e2.2o2|i	5	3	0;0;0;0;0	chr11	-	85663601-85682857;85663601-85682717;85663601-85663815;85663601-85663698;85663602-85663697	85663524-85663601;85663698-85665129;85682717-85682908	85663602-85663697
943	PDGFC	ENSG00000145431.11	ENSG00000145431.11:s:156767962-156767990	-0.0008;-0.0008;0.0021	1.030e-04;1.030e-04;4.144e-04	8.837e-01;8.837e-01;7.367e-01	0.0208;0.0208;0.9583	0.0076;0.0076;0.9848	s|1e1.1o1|1e2.1o1|i	3	3	0;0;0	chr4	-	156767876-156767962;156763206-156767962;156767877-156767961	156760454-156763206;156767773-156767876;156767962-156767990	156767877-156767961
944	PDGFC	ENSG00000145431.11	ENSG00000145431.11:s:156810953-156811017	-0.0018;0.0018	6.448e-04;6.448e-04	7.259e-01;7.259e-01	0.0417;0.9583	0.0161;0.9839	s|1e1.1o1|i	2	2	0;0	chr4	-	156810868-156810953;156810892-156810952	156810837-156810891;156810953-156811017	156810892-156810952
945	RMND5B	ENSG00000145916.19	ENSG00000145916.19:s:178142633-178142728	-0.0006;0.0006	5.560e-04;5.560e-04	7.023e-01;7.023e-01	0.0385;0.9615	0.0286;0.9714	s|1e1.1o1|i	2	2	0;0	chr5	+	178142728-178142852;178142729-178142851	178142633-178142728;178142852-178142992	178142729-178142851
946	SHPRH	ENSG00000146414.17	ENSG00000146414.17:s:145955187-145955354	-0.0002;0.0002	6.381e-05;6.381e-05	8.357e-01;8.357e-01	0.0238;0.9762	0.0204;0.9796	s|1e1.1o1|i	2	2	0;0	chr6	-	145954853-145955187;145954854-145955186	145954690-145954853;145955187-145955354	145954854-145955186
947	METTL13	ENSG00000010165.20	ENSG00000010165.20:s:171781660-171781795	-0.0002;-0.0002;0.0005	1.038e-05;1.038e-05;4.292e-05	9.297e-01;9.297e-01;8.303e-01	0.0136;0.0136;0.9728	0.0101;0.0101;0.9798	s|1e1.1o1|1e2.1o1|i	3	3	0;0;0	chr1	+	171781795-171781988;171781795-171783740;171781796-171781987	171781660-171781795;171781988-171782120;171783740-171784499	171781796-171781987
948	DPF1	ENSG00000011332.22	ENSG00000011332.22:s:38217798-38217876	-0.0001;-0.0001;0.0004	2.066e-04;2.066e-04;8.156e-04	8.075e-01;8.075e-01;6.178e-01	0.0222;0.0222;0.9556	0.0222;0.0222;0.9556	s|1e1.1o1|1e2.1o1|i	3	3	0;0;0	chr19	-	38217591-38217798;38216403-38217798;38217653-38217797	38216353-38216510;38217391-38217652;38217798-38217876	38217653-38217797
949	CLK1	ENSG00000013441.17	ENSG00000013441.17:s:200857718-200857884	-0.0003;0.0003	4.260e-04;4.260e-04	7.129e-01;7.129e-01	0.0333;0.9667	0.0312;0.9688	s|1e1.1o1|i	2	2	0;0	chr2	-	200856985-200857718;200856986-200857717	200856891-200856985;200857718-200857884	200856986-200857717
950	CLK1	ENSG00000013441.17	ENSG00000013441.17:s:200861090-200861466	0.0000;0.0000;-0.0001	7.248e-06;7.248e-06;3.015e-05	9.370e-01;9.370e-01;8.452e-01	0.0111;0.0111;0.9778	0.0118;0.0118;0.9764	s|1e1.1o1|1e2.1o1|i	3	3	0;0;0	chr2	-	200860215-200861238;200859746-200861238;200860984-200861089	200859680-200859746;200860125-200860215;200861090-200861466	200860984-200861089
951	CLK1	ENSG00000013441.17	ENSG00000013441.17:t:200859680-200859746	0.0003;0.0003;-0.0007	7.937e-05;7.937e-05;3.240e-04	8.879e-01;8.879e-01;7.464e-01	0.0131;0.0131;0.9738	0.0171;0.0171;0.9658	t|1e1.1o1|1e2.1o1|i	3	3	0;0;0	chr2	-	200859746-200861238;200859746-200860125;200859747-200860124	200859680-200859746;200860125-200860215;200861090-200861466	200859747-200860124
952	CLK1	ENSG00000013441.17	ENSG00000013441.17:t:200860125-200860215	0.0003;-0.0003	1.220e-05;1.220e-05	9.085e-01;9.085e-01	0.0132;0.9868	0.0182;0.9818	t|1e1.1o1|i	2	2	0;0	chr2	-	200860215-200861238;200860216-200860964	200860125-200860215;200861090-200861466	200860216-200860964
953	CLK1	ENSG00000013441.17	ENSG00000013441.17:t:200861090-200861466	0.0002;0.0002;-0.0007	2.619e-04;2.619e-04;1.042e-03	8.040e-01;8.040e-01;6.095e-01	0.0208;0.0208;0.9583	0.0256;0.0256;0.9487	t|1e1.1o1|1e2.1o1|i	3	3	0;0;0	chr2	-	200861466-200864564;200861466-200861702;200861467-200861701	200861090-200861466;200861702-200861862;200864564-200864691	200861467-200861701
954	NUDCD3	ENSG00000015676.18	ENSG00000015676.18:t:44379119-44383756	-0.0001;0.0001	3.439e-08;3.445e-08	9.847e-01;9.847e-01	0.0096;0.9904	0.0065;0.9935	t|1e1.1o1|i	2	2	0;0	chr7	-	44383756-44402642;44383757-44385350	44379119-44383756;44402642-44402923	44383757-44385350
955	ZNF839	ENSG00000022976.16	ENSG00000022976.16:t:102342103-102342702	-0.0004;0.0004	1.358e-04;1.358e-04	7.923e-01;7.923e-01	0.0294;0.9706	0.0233;0.9767	t|1e1.1o2|i	2	2	0;0	chr14	+	102339223-102342103;102341977-102342102	102339094-102339229;102342103-102342702	102341977-102342102
956	IFT88	ENSG00000032742.18	ENSG00000032742.18:s:20601705-20601748	0.0001;-0.0001	2.545e-04;2.545e-04	7.540e-01;7.540e-01	0.0257;0.9743	0.0303;0.9697	s|1e1.1o1|i	2	2	0;0	chr13	+	20601748-20601851;20601749-20601850	20601705-20601748;20601851-20601933	20601749-20601850
957	TRIO	ENSG00000038382.21	ENSG00000038382.21:s:14487464-14488260	-0.0002;-0.0002;0.0004	2.157e-06;2.157e-06;9.197e-06	9.575e-01;9.575e-01;8.898e-01	0.0108;0.0108;0.9785	0.0079;0.0079;0.9841	s|1e1.1o1|2e1.1o1|i	3	2	0;0;0	chr5	+	14487730-14492567;14488260-14492567;14488261-14488447	14487464-14488260;14492370-14492814	14488261-14488447
958	ZIC2	ENSG00000043355.12	ENSG00000043355.12:s:99985494-99985672	-0.0009;0.0009	3.165e-04;3.165e-04	7.535e-01;7.535e-01	0.0333;0.9667	0.0227;0.9773	s|1e1.1o1|i	2	2	0;0	chr13	+	99985672-99985866;99985673-99985865	99985494-99985672;99985866-99986765	99985673-99985865
959	NOP16	ENSG00000048162.22	ENSG00000048162.22:s:176388433-176388927	-0.0000;-0.0000;0.0000	1.639e-04;1.639e-04;6.500e-04	8.265e-01;8.265e-01;6.463e-01	0.0185;0.0185;0.9630	0.0208;0.0208;0.9583	s|1e1.1o1|1e2.1o2|i	3	3	0;0;0	chr5	-	176388343-176388433;176384286-176388433;176388344-176388432	176383946-176384286;176388235-176388343;176388433-176388927	176388344-176388432
960	NOP16	ENSG00000048162.22	ENSG00000048162.22:t:176383946-176384286	-0.0002;-0.0002;-0.0002;0.0010	2.842e-06;2.842e-06;2.842e-06;2.585e-05	9.693e-01;9.693e-01;9.693e-01;8.645e-01	0.0088;0.0088;0.0088;0.9737	0.0049;0.0049;0.0049;0.9853	t|1e1.1o1|1e2.1o1|2e2.1o1|i	4	3	0;0;0;0	chr5	-	176384286-176388433;176384286-176385221;176384283-176385221;176384287-176384333	176383946-176384286;176384643-176385327;176388433-176388927	176384287-176384333
961	MCUR1	ENSG00000050393.12	ENSG00000050393.12:s:13788646-13788704	-0.0002;0.0002	1.557e-06;1.557e-06	9.438e-01;9.438e-01	0.0143;0.9857	0.0116;0.9884	s|1e1.1o1|i	2	2	0;0	chr6	-	13787355-13788646;13787356-13788645	13786557-13787355;13788646-13788704	13787356-13788645
962	MCUR1	ENSG00000050393.12	ENSG00000050393.12:t:13788646-13788704	-0.0003;0.0003	6.969e-06;6.969e-06	9.242e-01;9.242e-01	0.0159;0.9841	0.0128;0.9872	t|1e1.1o1|i	2	2	0;0	chr6	-	13788704-13791878;13788705-13790787	13788646-13788704;13791878-13791992	13788705-13790787
963	TAB2	ENSG00000055208.19	ENSG00000055208.19:t:149378672-149379518	-0.0001;0.0001	1.163e-08;1.164e-08	9.903e-01;9.903e-01	0.0083;0.9917	0.0048;0.9952	t|1e1.1o1|i	2	2	0;0	chr6	+	149317623-149378672;149378530-149378671	149317534-149317623;149378672-149379518	149378530-149378671
964	FLYWCH1	ENSG00000059122.17	ENSG00000059122.17:s:2948688-2948713	-0.0004;0.0004	3.531e-05;3.531e-05	8.687e-01;8.687e-01	0.0213;0.9787	0.0161;0.9839	s|1e1.1o1|i	2	2	0;0	chr16	+	2948713-2948844;2948714-2948843	2948688-2948713;2948844-2951208	2948714-2948843
965	LIMCH1	ENSG00000064042.18	ENSG00000064042.18:s:41697160-41697895	-0.0001;0.0001	3.333e-09;3.389e-09	9.935e-01;9.935e-01	0.0075;0.9925	0.0047;0.9953	s|1e1.1o1|i	2	2	0;0	chr4	+	41697314-41698350;41697896-41698349	41697160-41697895;41698350-41700044	41697896-41698349
966	ELAVL1	ENSG00000066044.15	ENSG00000066044.15:t:7958573-7961612	-0.0002;0.0002	5.389e-08;5.388e-08	9.821e-01;9.821e-01	0.0100;0.9900	0.0063;0.9937	t|1e1.1o1|i	2	2	0;0	chr19	-	7961612-7973725;7961613-7963158	7958573-7961612;7973725-7973878	7961613-7963158
967	MEF2A	ENSG00000068305.18	ENSG00000068305.18:s:99712390-99714137	-0.0006;0.0006	8.825e-06;8.825e-06	9.222e-01;9.222e-01	0.0185;0.9815	0.0097;0.9903	s|1e1.1o1|i	2	2	0;0	chr15	+	99712835-99715468;99714138-99715467	99712390-99714137;99715468-99716488	99714138-99715467
968	PAFAH1B3	ENSG00000079462.8	ENSG00000079462.8:t:42302232-42302325	-0.0000;-0.0000;-0.0000;0.0001	1.735e-11;1.735e-11;1.735e-11;3.716e-10	9.992e-01;9.992e-01;9.992e-01;9.946e-01	0.0029;0.0029;0.0029;0.9913	0.0017;0.0017;0.0017;0.9948	t|1e1.1o1|1e2.1o1|1e3.1o1|i	4	4	0;0;0;0	chr19	-	42302325-42303468;42302325-42302699;42302325-42302437;42302326-42302436	42302232-42302325;42302437-42302624;42302699-42302777;42303468-42303546	42302326-42302436
969	SEMA5B	ENSG00000082684.16	ENSG00000082684.16:s:122912235-122912342	-0.0006;0.0006	6.930e-06;6.930e-06	9.318e-01;9.318e-01	0.0179;0.9821	0.0081;0.9919	s|1e1.1o1|i	2	2	0;0	chr3	-	122912069-122912235;122912235-122912234	122911920-122912069;122912172-122912234;122912235-122912342	122912235-122912234
970	SEMA5B	ENSG00000082684.16	ENSG00000082684.16:t:122912172-122912234	-0.0006;0.0006	6.930e-06;6.930e-06	9.318e-01;9.318e-01	0.0179;0.9821	0.0081;0.9919	t|1e1.1o1|i	2	2	0;0	chr3	-	122912234-122912843;122912235-122912234	122912172-122912234;122912235-122912342;122912843-122913061	122912235-122912234
971	DNM1L	ENSG00000087470.19	ENSG00000087470.19:s:32739845-32740240	0.0005;-0.0005	6.628e-04;6.628e-04	6.895e-01;6.895e-01	0.0312;0.9688	0.0417;0.9583	s|1e1.1o1|i	2	2	0;0	chr12	+	32740240-32740409;32740241-32740408	32739845-32740240;32740409-32740518	32740241-32740408
972	DHPS	ENSG00000095059.17	ENSG00000095059.17:s:12680196-12680325	-0.0000;0.0000	9.141e-07;9.141e-07	9.520e-01;9.520e-01	0.0118;0.9882	0.0119;0.9881	s|1e1.1o1|i	2	2	0;0	chr19	-	12679922-12680196;12680178-12680195	12679801-12679922;12680196-12680325	12680178-12680195
973	DHPS	ENSG00000095059.17	ENSG00000095059.17:t:12676017-12676142	-0.0000;-0.0000;-0.0000;-0.0000;-0.0000;-0.0001	2.188e-04;2.188e-04;2.188e-04;2.188e-04;2.188e-04;4.237e-03	8.653e-01;8.653e-01;8.653e-01;8.653e-01;8.653e-01;4.233e-01	0.0145;0.0145;0.0145;0.0145;0.0145;0.9274	0.0139;0.0139;0.0139;0.0139;0.0139;0.9306	t|1e1.1o1|1e2.1o1|2e1.1o1|3e1.1o1|3e2.1o1|i	6	3	0;0;0;0;0;0	chr19	-	12676142-12677291;12676142-12677108;12676105-12677291;12676078-12677291;12676078-12677108;12676143-12676774	12676017-12676142;12677090-12677211;12677271-12677396	12676143-12676774
974	EEF1A2	ENSG00000101210.13	ENSG00000101210.13:s:63488340-63488425	0.0000;-0.0000	2.249e-21;1.958e-13	9.994e-01;9.994e-01	0.0039;0.9961	0.0044;0.9956	s|1e1.1o1|i	2	2	0;0	chr20	-	63488152-63488340;63488153-63488339	63488013-63488152;63488340-63488425	63488153-63488339
975	DENND10	ENSG00000119979.18	ENSG00000119979.18:t:119137057-119137984	-0.0003;-0.0003;0.0007	3.298e-05;3.298e-05;1.331e-04	9.082e-01;9.082e-01;7.871e-01	0.0152;0.0152;0.9697	0.0122;0.0122;0.9755	t|1e1.1o2|1e2.1o1|i	3	3	0;0;0	chr10	+	119132609-119137057;119136920-119137057;119136921-119137056	119132515-119134128;119136471-119136920;119137057-119137984	119136921-119137056
976	CAMSAP1	ENSG00000130559.19	ENSG00000130559.19:s:135811096-135811611	-0.0001;0.0001	2.321e-08;2.321e-08	9.895e-01;9.895e-01	0.0081;0.9919	0.0054;0.9946	s|1e1.1o1|i	2	2	0;0	chr9	-	135810680-135811096;135810681-135811095	135808487-135810680;135811096-135811611	135810681-135811095
977	POMT1	ENSG00000130714.19	ENSG00000130714.19:t:131510357-131510415	-0.0001;-0.0001;-0.0001;0.0005	1.531e-06;1.531e-06;1.531e-06;1.420e-05	9.693e-01;9.693e-01;9.693e-01;8.648e-01	0.0079;0.0079;0.0079;0.9762	0.0066;0.0066;0.0066;0.9803	t|1e1.1o1|1e2.1o1|1e3.1o3|i	4	4	0;0;0;0	chr9	+	131503073-131510357;131509022-131510357;131509996-131510357;131510320-131510356	131502789-131503073;131508965-131509022;131509903-131510141;131510357-131510415	131510320-131510356
978	ZNF767P	ENSG00000133624.14	ENSG00000133624.14:s:149549083-149549374	-0.0003;0.0003	7.003e-04;7.003e-04	6.831e-01;6.831e-01	0.0357;0.9643	0.0345;0.9655	s|1e1.1o1|i	2	2	0;0	chr7	-	149547776-149549193;149547777-149549082	149547154-149547776;149549083-149549374	149547777-149549082
979	FBH1	ENSG00000134452.20	ENSG00000134452.20:t:5937206-5937594	-0.0003;0.0003	5.616e-05;5.616e-05	8.406e-01;8.406e-01	0.0222;0.9778	0.0208;0.9792	t|1e1.1o1|i	2	2	0;0	chr10	+	5936730-5937206;5937129-5937205	5936633-5936730;5937206-5937594	5937129-5937205
980	SAT2	ENSG00000141504.12	ENSG00000141504.12:s:7627363-7627479	0.0002;0.0002;-0.0006	1.713e-04;1.713e-04;6.812e-04	8.286e-01;8.286e-01;6.484e-01	0.0171;0.0171;0.9658	0.0230;0.0230;0.9540	s|1e1.1o1|1e2.1o1|i	3	3	0;0;0	chr17	-	7627226-7627363;7626793-7627363;7627227-7627362	7626707-7626793;7627143-7627226;7627363-7627479	7627227-7627362
981	TMEM138	ENSG00000149483.13	ENSG00000149483.13:s:61364250-61364315	-0.0002;-0.0002;0.0005	1.192e-04;1.192e-04;4.734e-04	8.435e-01;8.435e-01;6.737e-01	0.0202;0.0202;0.9596	0.0185;0.0185;0.9630	s|1e1.1o1|1e2.1o1|i	3	3	0;0;0	chr11	+	61364315-61364433;61364315-61366045;61364316-61364432	61364250-61364315;61364433-61364870;61365703-61366557	61364316-61364432
982	NKAPD1	ENSG00000150776.18	ENSG00000150776.18:s:112074086-112074358	-0.0004;-0.0004;0.0010	1.322e-04;1.322e-04;5.245e-04	8.372e-01;8.372e-01;6.636e-01	0.0230;0.0230;0.9540	0.0171;0.0171;0.9658	s|1e1.1o1|1e2.1o1|i	3	3	0;0;0	chr11	+	112074358-112074887;112074358-112075567;112074359-112074784	112074086-112074358;112074785-112074916;112075567-112075684	112074359-112074784
983	CAMKV	ENSG00000164076.17	ENSG00000164076.17:s:49861789-49861865	-0.0002;-0.0002;-0.0002;0.0008	1.350e-05;1.350e-05;1.350e-05;1.179e-04	9.391e-01;9.391e-01;9.391e-01;7.681e-01	0.0119;0.0119;0.0119;0.9643	0.0083;0.0083;0.0083;0.9750	s|1e1.1o3|1e1.3o3|1e2.1o1|i	4	3	0;0;0;0	chr3	-	49861577-49861791;49861537-49861791;49861448-49861791;49861578-49861788	49861439-49861448;49861464-49861577;49861789-49861865	49861578-49861788
984	CAMKV	ENSG00000164076.17	ENSG00000164076.17:t:49857988-49859676	-0.0001;-0.0001;0.0003	1.938e-06;1.938e-06;8.246e-06	9.602e-01;9.602e-01;8.958e-01	0.0100;0.0100;0.9801	0.0081;0.0081;0.9837	t|1e1.1o1|1e2.1o1|i	3	3	0;0;0	chr3	-	49859676-49860171;49859676-49859770;49859677-49859768	49857988-49859676;49859769-49859881;49860171-49860258	49859677-49859768
985	CAMKV	ENSG00000164076.17	ENSG00000164076.17:t:49860716-49860852	-0.0002;-0.0002;0.0005	4.432e-05;4.432e-05;1.778e-04	8.947e-01;8.947e-01;7.618e-01	0.0159;0.0159;0.9683	0.0128;0.0128;0.9744	t|1e2.1o1|2e1.2o2|i	3	3	0;0;0	chr3	-	49860852-49860943;49860844-49861180;49860853-49860942	49860716-49860852;49860943-49861024;49861130-49861300	49860853-49860942
986	CAMKV	ENSG00000164076.17	ENSG00000164076.17:t:49861439-49861448	-0.0002;0.0002	4.195e-07;4.195e-07	9.651e-01;9.651e-01	0.0116;0.9884	0.0090;0.9910	t|1e1.1o1|i	2	2	0;0	chr3	-	49861448-49861791;49861449-49861463	49861439-49861448;49861789-49861865	49861449-49861463
987	EIF3I	ENSG00000084623.12	ENSG00000084623.12:t:32231260-32231604	-0.0001;0.0001	1.101e-08;1.106e-08	9.902e-01;9.902e-01	0.0077;0.9923	0.0060;0.9940	t|1e1.1o1|i	2	2	0;0	chr1	+	32231019-32231260;32231231-32231259	32230927-32231054;32231260-32231604	32231231-32231259
988	URI1	ENSG00000105176.18	ENSG00000105176.18:t:30015536-30016612	-0.0002;0.0002	8.924e-06;8.923e-06	9.078e-01;9.078e-01	0.0167;0.9833	0.0149;0.9851	t|1e1.1o1|i	2	2	0;0	chr19	+	30012531-30015536;30015027-30015535	30012285-30012899;30015536-30016612	30015027-30015535
989	PSMD3	ENSG00000108344.15	ENSG00000108344.15:t:39997794-39997959	-0.0002;0.0002	1.520e-07;1.519e-07	9.783e-01;9.783e-01	0.0106;0.9894	0.0068;0.9932	t|1e1.1o2|i	2	2	0;0	chr17	+	39989793-39997794;39997612-39997793	39989739-39989929;39997794-39997959	39997612-39997793
990	AIP	ENSG00000110711.11	ENSG00000110711.11:t:67490997-67491154	-0.0001;0.0001	3.290e-06;3.290e-06	9.299e-01;9.299e-01	0.0141;0.9859	0.0139;0.9861	t|1e1.1o1|i	2	2	0;0	chr11	+	67489455-67490997;67490947-67490996	67489267-67489455;67490997-67491154	67490947-67490996
991	ASIC1	ENSG00000110881.12	ENSG00000110881.12:s:50081545-50081940	-0.0002;0.0002	1.307e-05;1.307e-05	8.926e-01;8.926e-01	0.0179;0.9821	0.0161;0.9839	s|1e1.1o1|i	2	2	0;0	chr12	+	50081778-50082716;50081941-50082715	50081545-50081940;50082716-50083611	50081941-50082715
992	ZNF304	ENSG00000131845.15	ENSG00000131845.15:s:57351271-57351417	-0.0004;0.0004	5.501e-05;5.501e-05	8.490e-01;8.490e-01	0.0227;0.9773	0.0179;0.9821	s|1e1.1o1|i	2	2	0;0	chr19	+	57351417-57351492;57351418-57351491	57351271-57351417;57351492-57351697	57351418-57351491
993	RAF1	ENSG00000132155.14	ENSG00000132155.14:s:12586275-12586344	0.0000;-0.0000	1.129e-04;1.129e-04	8.122e-01;8.122e-01	0.0217;0.9783	0.0238;0.9762	s|1e1.2o2|i	2	2	0;0	chr3	-	12585253-12586275;12585820-12586274	12585122-12585406;12586275-12586344	12585820-12586274
994	RAF1	ENSG00000132155.14	ENSG00000132155.14:s:12586641-12587951	0.0001;0.0001;0.0001;0.0001;0.0001;-0.0010	3.328e-05;3.328e-05;3.328e-05;3.328e-05;3.328e-05;6.700e-04	9.415e-01;9.415e-01;9.415e-01;9.415e-01;9.415e-01;6.445e-01	0.0067;0.0067;0.0067;0.0067;0.0067;0.9667	0.0093;0.0093;0.0093;0.0093;0.0093;0.9537	s|1e1.1o1|1e2.1o3|1e2.2o3|1e2.3o3|1e3.1o2|i	6	4	0;0;0;0;0;0	chr3	-	12586344-12587591;12585819-12587591;12585799-12587591;12585781-12587591;12585406-12587591;12586345-12586640	12585122-12585406;12585681-12585819;12586275-12586344;12586641-12587951	12586345-12586640
995	RAF1	ENSG00000132155.14	ENSG00000132155.14:s:12612009-12612098	-0.0000;0.0000	2.248e-21;2.588e-14	9.997e-01;9.997e-01	0.0042;0.9958	0.0029;0.9971	s|1e1.1o1|i	2	2	0;0	chr3	-	12609335-12612009;12612002-12612008	12609165-12609335;12612009-12612098	12612002-12612008
996	RAF1	ENSG00000132155.14	ENSG00000132155.14:t:12585122-12585406	0.0000;0.0000;0.0000;0.0000;-0.0002	2.125e-05;2.125e-05;2.125e-05;2.125e-05;2.987e-04	9.341e-01;9.341e-01;9.341e-01;9.341e-01;6.835e-01	0.0093;0.0093;0.0093;0.0093;0.9628	0.0105;0.0105;0.0105;0.0105;0.9579	t|1e2.1o1|2e1.1o1|2e3.1o1|2e4.1o1|i	5	5	0;0;0;0;0	chr3	-	12585406-12587591;12585253-12590798;12585253-12586275;12585253-12585681;12585407-12585680	12585122-12585406;12585681-12585819;12586275-12586344;12586641-12587951;12587979-12590974	12585407-12585680
[truncated: 2,812 more rows]

## Sheet: rmats
RMATS A3SS JC
ID	GeneID	geneSymbol	chr	strand	longExonStart_0base	longExonEnd	shortES	shortEE	flankingES	flankingEE	ID.1	IJC_SAMPLE_1	SJC_SAMPLE_1	IJC_SAMPLE_2	SJC_SAMPLE_2	IncFormLen	SkipFormLen	PValue	FDR	IncLevel1	IncLevel2	IncLevelDifference
[truncated: 710 more rows]

## Sheet: microexonator
	exon_ID	Gene	Node	Coord	Strand	Type	Psi_A	Psi_B	DeltaPsi	Probability	Complexity	Entropy	gene_name
[truncated: 118 more rows]

[truncated: 1 more sheets: Gene Ontology]
